# Supplementary material for: Overlap between differentially methylated DNA regions in blood B lymphocytes and genetic at-risk loci in primary Sjögren's syndrome
Source: HighWire-hosted journal article supplement (doi:10.1136/annrheumdis-2014-206998), 2015-07-17
Supplement: annrheumdis-2014-206998supp.pdf [file annrheumdis-2014-206998supp.pdf]

## **Supplementary Methods**

### ***Genome-wide DNA methylation study***

DNAs were bisulfite treated using the EpiTect<sup>®</sup> 96 Bisulfite Kit (Qiagen). 200 ng of bisulfite treated DNA of each sample was analysed using the Infinium Human Methylation 450K BeadChips (Illumina, San Diego, CA) according to the manufacture's protocol. The 450K BeadChips analyses 480,000 methylation sites covering 99% of RefSeq genes with an average of 17 CpG sites per gene across the promoter region, 5'-untranslated region (5'UTR), first exon, gene body and 3'-UTR and 96% of CpG islands.[1]

### ***Validation of differentially methylated CpG sites by pyrosequencing***

To validate the results of the array, quantitative DNA methylation analysis was performed by pyrosequencing [2] using the amplification and pyrosequencing primers detailed below. PCR was performed at 96 °C for 10 min, followed by 50 cycles at 95 °C for 10 sec, 10 sec at the respective annealing temperature and 72 °C for 10 sec. Methylation data were analyzed using the Pyro-Q-CpG software (Qiagen). The DNA methylation levels of *ALU* and *LINE1* elements were used as a surrogate marker for global DNA methylation levels and analyzed as previously reported.[3]

| <b>Gene</b>         | <b>PCR primer forward</b>                    | <b>PCR primer reverse</b>                      | <b>PCR annealing temp(°C)</b> | <b>Pyrosequencing primer(s)</b>                     |
|---------------------|----------------------------------------------|------------------------------------------------|-------------------------------|-----------------------------------------------------|
| <i>IFITM1</i>       | TTAGTTTAGGGATAG<br>GAAGATGGTT                | Biotin-<br>AAAACAAAACCAAAAA<br>AACAAAAAC       | 56                            | TAGATAATATAGGAA<br>AAA                              |
| <i>IFITM3</i>       | GGGTAGTGTAGGGG<br>TTGATTAATTT                | Biotin-<br>TCAAAAAACATCACTAA<br>AACCAAAA       | 58                            | TTGAATGTTATTGTAG<br>AAAA                            |
| <i>IFI44L AMP 1</i> | TTATGTTAGTGTGGA<br>TTGAGTGAAG                | Biotin-<br>TCCTACATTTATTAATTA<br>AAATTTAAAAATT | 56                            | AATGTTTTATGAATTT<br>AGT<br>GGGATAGTTATAGTGT<br>TTAT |
| <i>IFI44L AMP 2</i> | ATAAGGAATTGAAT<br>TTTGTTAATAATTAT<br>A       | Biotin-<br>TATAAAAAACCTTAAAA<br>CATCTACC       | 58                            | TGTTGTTTTAAGTTTTT<br>A                              |
| <i>IRF5</i>         | TTTTTTAGGGTTGTT<br>TATTGGATGT                | Biotin-<br>TCAAAACCCATAACTTT<br>AAAAATTC       | 54                            | TATATATTTTATTTAG<br>AGAT                            |
| <i>RUNX3 AMP1</i>   | TAGTTTGGGGTTAAT<br>AATTTTTTTT                | Biotin-<br>ACCACTACTATTTTTCTT<br>TTACCACC      | 56                            | GAGGTTTGTAATAATG                                    |
| <i>RUNX3 AMP2</i>   | TTTATTTGTGAGGTT<br>GGTTTTAGTA                | Biotin-<br>AAATAACATAACAAAA<br>AACTCTCC        | 56                            | GGTTTAAGAAATAGA<br>ATTGA                            |
| <i>TNFAIP8 AMP1</i> | TGTTTTTTTTAAGGT<br>TGGTTTATTG                | Biotin-<br>AAAACATCCAAAAACA<br>ATTTCTTAC       | 56                            | TGGTTAGTTATTATTA<br>TTTA                            |
| <i>TNFAIP8 AMP2</i> | TTTGATTTAGGATGT<br>GTGGTAGAG                 | Biotin-<br>AAAAAATATAACCAACC<br>AAAAAAA        | 56                            | GAAGGGTGTAGTTTTGT                                   |
| <i>IKZF1 AMP1</i>   | AAAAGGATAGAAAAG<br>TAATGTGGATTTAAA           | Biotin-<br>AACATTATTTTATTTTTC<br>AAAATAAACTAA  | 58                            | AATTTAAATAAATTTT<br>AGTG                            |
| <i>IKZF1 AMP2</i>   | Biotin-<br>GGTTTTATTTAGTAT<br>TTGTTTTTTTATGT | ACTCTTAAAACTTTACT<br>ATCCTCCC                  | 56                            | ATACCTAAACTTCCCC<br>C                               |
| <i>IKZF1 AMP3</i>   | TTGAATGTGAGTTTT<br>TTTTAAATTGAG              | Biotin-<br>AAACACTTAAATCCTAT<br>CACACTCCTT     | 56                            | ATTGAGGTTATATTAA<br>GTTT                            |
| <i>SLC15A4</i>      | GTTTGAGGTTTTGAT<br>TTTTGTAGGA                | Biotin-<br>ATATACACTTTATTTTCC<br>CATTTTACCC    | 56                            | AATGAATAGGTTTTAT<br>TAGA                            |
| <i>GRB2</i>         | AAAGTGAGAGGGTT<br>ATAGGGTGATT                | Biotin-<br>CTCAAACCCCAACTAAT<br>AAAAAAA        | 56                            | TTTTTGATTTTTAGA                                     |
| <i>MIR21</i>        | TTTATATGTTAATTT<br>AGTTTTTTTTGT              | Biotin-<br>CAAACATTTCTAACCTA<br>TTAAAATC       | 51                            | ATAGAATAGAATTGG<br>GGTT                             |
| <i>IL21R</i>        | GGTGTAGAGTTTGAT<br>GGGATTTATTT               | Biotin-<br>TCTCCTCCACATACACA<br>AAAAACTA       | 64                            | GGTTGGTGTGTTTATT                                    |
| <i>CXCR5</i>        | GGGAGTTTATAGGTT<br>AAGTTAGTATT               | Biotin-<br>CAACTTATATTTTTAAAT<br>CCTCATATAC    | 58                            | AATTGAAGTTTTGTGA<br>TTTT                            |
| <i>TRAF5</i>        | TGAGGTAGGAGAAT<br>TGTTTGAATTT                | Biotin-<br>TAAACCTAATCATCCCC<br>ATTTTACA       | 64                            | TTAGTTGTAGAGTTTG<br>TTGA                            |

## ***Statistical analyses***

Raw signals of 450K BeadChips were extracted using the GenomeStudio<sup>®</sup> software (v2011.1, Illumina). The DNA methylation level of each CpG was calculated as the ratio of the intensity of fluorescent signals of the methylated alleles to the sum of methylated and unmethylated alleles ( $\beta$  value). A refined version of the SQN pipeline [4] including a revised annotation file [5] was used for data processing, correction and normalization. Intensity values were corrected for potential biases in fluorescent dye intensity and background corrected using the *lumi* R package [6] as implemented in the SQN pipeline. Probes potentially influenced by SNPs underlying the entire sequence of the probe (+1 or + 2 bases depending on the Infinium probe type) that are present in the EUR population of the 1000 Genome project (<http://www.1000genomes.org>) at a frequency of more than 5 % were removed from the analysis. Furthermore, probes previously reported to map to several genomic regions were removed.[7] The Subset Quantile Normalization pipeline uses then the intensity signals of high-quality (i.e. low detection p-value) Infinium I probes as “anchors” to estimate a reference distribution of quantiles for probes in a biologically similar context based on the annotation file.[4] This reference is then used to estimate a target distribution of quantiles for Infil probes as a means to provide an accurate normalization of Infil/InfII probes and correct for the shift. SQN is performed for each individual separately. As principal component analysis as well as hierarchical clustering did not show an overall difference in the methylation patterns between patients and controls, a quantile normalization was performed for between sample normalization.

## ***References***

- 1 Sandoval J, Heyn H, Moran S, *et al.* Validation of a DNA methylation microarray for 450,000 CpG sites in the human genome. *Epigenetics* 2011;**6**(6):692-702.
- 2 Tost J, Gut IG. Analysis of gene-specific DNA methylation patterns by pyrosequencing technology. *Methods Mol Biol* 2007;**373**:89-102.

- 3 Yang AS, Estecio MR, Doshi K, Kondo Y, Tajara EH, Issa JP. A simple method for estimating global DNA methylation using bisulfite PCR of repetitive DNA elements. *Nucleic Acids Res* 2004;**32**(3):e38.
- 4 Touleimat N, Tost J. Complete pipeline for Infinium((R)) Human Methylation 450K BeadChip data processing using subset quantile normalization for accurate DNA methylation estimation. *Epigenomics* 2012;**4**(3):325-41.
- 5 Price ME, Cotton AM, Lam LL, *et al.* Additional annotation enhances potential for biologically-relevant analysis of the Illumina Infinium HumanMethylation450 BeadChip array. *Epigenetics chromatin* 2013;**6**(1):4.
- 6 Du P, Kibbe WA, Lin SM. lumi: a pipeline for processing Illumina microarray. *Bioinformatics* 2008;**24**(13):1547-8
- 7 Chen YA, Lemire M, Choufani S, *et al.* Discovery of cross-reactive probes and polymorphic CpGs in the Illumina Infinium HumanMethylation450 microarray. *Epigenetics* 2013;**8**(2):203-9.
