# Supplementary material for: Overlap between differentially methylated DNA regions in blood B lymphocytes and genetic at-risk loci in primary Sjögren's syndrome
Source: HighWire-hosted journal article supplement (doi:10.1136/annrheumdis-2014-206998), 2015-07-17
Supplement: annrheumdis-2014-206998supp_data.xls [file annrheumdis-2014-206998supp_data.xls]

## Sheet: CpG B cell DiffMedian>7% p<0.01
targetID	geneCode	geneName	p values	median_LB patients	median_LB controls	diffMedian_LB patients to controls
cg05696877	NM_006820	IFI44L	0.000186125	0.19193	0.633779	-0.441849
cg09639108			0.00859181	0.534013	0.934506	-0.400494
cg12501287	NM_005539	INPP5A	0.00663553	0.560641	0.960031	-0.39939
cg14114910	NM_198469	MORN5	0.0066896	0.560745	0.953285	-0.39254
cg05552874	NM_001548	IFIT1	8.47324e-06	0.294863	0.684103	-0.38924
cg16866567	NM_021623	PLEKHA2	0.00530429	0.457565	0.0684451	0.38912
cg16564132			0.0029502	0.219294	0.562267	-0.342973
cg19585676	NM_002116	HLA-A	0.0082544	0.700715	0.359224	0.341491
cg04282082	NM_199160;NM_014368	LHX6;LHX6	0.0013077	0.566787	0.907969	-0.341182
cg03607951	NM_006820	IFI44L	3.26654e-05	0.277229	0.609284	-0.332055
cg13953972	NM_031453	FAM107B	0.00622935	0.530289	0.857657	-0.327369
cg14218851			0.00622935	0.339912	0.626725	-0.286813
cg14293575	NM_017414	USP18	0.000539576	0.309855	0.590538	-0.280683
cg27436995	NM_153350	FBXL16	0.00400884	0.6094	0.337396	0.272004
cg23564471	NM_001005388;NM_001160331;NM_015090;NM_001160332	NFASC;NFASC;NFASC;NFASC	0.00539169	0.659261	0.921084	-0.261823
cg00514723	NM_032221	CHD6	0.0013077	0.224208	0.472673	-0.248465
cg04922029	NM_001122951;NM_002036;NM_002036	DARC;DARC;DARC	0.0057972	0.39891	0.642105	-0.243195
cg19245335	NM_022115;NM_001040424	PRDM15;PRDM15	0.00318837	0.579056	0.820867	-0.241811
cg11693709	NM_020168;NM_001128628;NM_001128629	PAK6;PAK6;PAK6	0.00344351	0.268191	0.509442	-0.241251
cg25830305	NM_003282;NM_001145829	TNNI2;TNNI2	0.00344351	0.324272	0.0852975	0.238975
cg23233416			0.00203521	0.559299	0.796163	-0.236865
cg14102437	NM_001166264;NM_000627;NM_001166266;NM_001166264;NM_000627;NM_206943;NM_001166265;NM_001166266;NM_001166265	LTBP1;LTBP1;LTBP1;LTBP1;LTBP1;LTBP1;LTBP1;LTBP1;LTBP1	0.000251303	0.473046	0.709713	-0.236667
cg06981309	NM_021105	PLSCR1	0.000447907	0.161837	0.396358	-0.234521
cg06872964	NM_006820	IFI44L	0.000305694	0.261192	0.492911	-0.231718
cg27141807	NM_080862	SPSB4	0.00318837	0.872546	0.643605	0.228941
cg12733396	NM_001852	COL9A2	0.000336738	0.599516	0.377431	0.222086
cg22508930	NM_015646;NM_001010942	RAP1B;RAP1B	0.00717946	0.573183	0.356442	0.216741
cg02389040			0.00400884	0.404209	0.620121	-0.215912
cg16682903	NM_001105;NM_001111067	ACVR1;ACVR1	0.00432125	0.357797	0.572296	-0.214499
cg01361499			0.00465502	0.234646	0.449115	-0.214468
cg12903648	NM_031281	FCRL5	3.32831e-06	0.511766	0.299584	0.212182
cg24262870			0.0013077	0.195751	0.407717	-0.211966
cg16174106	NM_018194;NM_001170564;NM_001170580;NM_001170588;NM_001122834;NM_001170587	HHAT;HHAT;HHAT;HHAT;HHAT;HHAT	0.000407605	0.215392	0.426628	-0.211235
cg01974091	NM_206918	DEGS2	0.000407605	0.648929	0.439542	0.209386
cg04332442	NM_014246	CELSR1	0.000647979	0.232226	0.440954	-0.208728
cg16273546			0.000205893	0.552183	0.758472	-0.206289
cg13740929			0.000847879	0.619087	0.82427	-0.205183
cg14167415			0.00946756	0.537061	0.741655	-0.204594
cg21785750			0.00770052	0.643275	0.847624	-0.204349
cg13429555			0.00110202	0.261973	0.466014	-0.204041
cg18910313	NM_001040664;NM_002566	PPAN-P2RY11;P2RY11	0.00182573	0.396674	0.194064	0.20261
cg18076842	NM_020179	C11orf75	0.0013077	0.242353	0.444924	-0.202571
cg08570034	NM_006650	CPLX2	0.00318837	0.368306	0.5692	-0.200895
cg16301894			0.00371664	0.508386	0.706739	-0.198353
cg06318935			0.00946756	0.538239	0.735845	-0.197607
cg05857999			0.00946756	0.436603	0.633854	-0.19725
cg07455790			0.0057972	0.650981	0.847773	-0.196792
cg21211645	NM_015340	LARS2	5.77757e-05	0.415139	0.611589	-0.19645
cg01792601			0.00182573	0.32865	0.132355	0.196295
cg04597312	NM_002163	IRF8	0.000136777	0.520859	0.324774	0.196085
cg15611600	NM_018559;NM_012345	KIAA1704;NUFIP1	0.00717946	0.22437	0.0283973	0.195973
cg04936619	NM_022344	C17orf75	0.00663553	0.307339	0.502991	-0.195651
cg25769566			0.000925989	0.711584	0.907081	-0.195497
cg00050618	NM_181079;NM_181078	IL21R;IL21R	0.000491803	0.429794	0.234409	0.195384
cg02304584			0.0029502	0.386865	0.582147	-0.195283
cg22169990	NM_001042535;NM_031946	AGAP3;AGAP3	0.00182573	0.238807	0.434004	-0.195198
cg10170847			0.00182573	0.487278	0.292463	0.194816
cg12271419	NM_001160036;NM_015178;NM_001160037	RHOBTB2;RHOBTB2;RHOBTB2	0.000491803	0.368901	0.174204	0.194698
cg23985447	NM_001077654;NM_014350	TNFAIP8;TNFAIP8	8.03836e-05	0.443965	0.249268	0.194697
cg10696677	NM_001167827;NM_007162	TFEB;TFEB	0.00272801	0.502023	0.308332	0.193691
cg16704590	NR_003605;NR_003606;NR_003695;NR_003030;NR_031660;NR_003604	C20orf199;C20orf199;SNORD12B;SNORD12;MIR1259;C20orf199	0.000336738	0.472843	0.279537	0.193305
cg18264486			0.00770052	0.433777	0.626804	-0.193027
cg13738155			0.00296513	0.262279	0.454727	-0.192447
cg01099825	NM_015456	COBRA1	0.00371664	0.292666	0.484399	-0.191733
cg07368857	NM_032682;NM_001012505	FOXP1;FOXP1	0.000407605	0.619154	0.42814	0.191014
cg18182216	NM_018379;NM_001163259;NM_001163258;NM_001163260;NM_001040217	FAM63A;FAM63A;FAM63A;FAM63A;FAM63A	7.2074e-05	0.384831	0.574825	-0.189993
cg18281939	NM_005779	LHFPL2	0.000647979	0.227064	0.416566	-0.189502
cg13571460	NM_199160;NM_014368	LHX6;LHX6	0.00539169	0.726317	0.915475	-0.189158
cg11702988	NM_015205;NM_032189	ATP11A;ATP11A	0.00946756	0.371388	0.182527	0.188861
cg02997796	NM_014488	RAB30	0.000277283	0.634386	0.446469	0.187918
cg00480856	NM_003941	WASL	0.000647979	0.530264	0.717983	-0.18772
cg01178099			0.00344351	0.291701	0.479226	-0.187524
cg06315208	NM_014641	MDC1	0.000792279	0.652242	0.465981	0.186261
cg10929921	NM_003506;NM_001164615;NM_001164616	FZD6;FZD6;FZD6	5.77757e-05	0.412654	0.598413	-0.185759
cg03909983			9.97036e-05	0.397898	0.582744	-0.184846
cg22514722	NM_007283;NM_001003794	MGLL;MGLL	0.00101055	0.648029	0.463939	0.18409
cg13886799	NM_001001891;NM_001001666;NM_001001666;NM_001001891	ANO7;ANO7;ANO7;ANO7	0.00344725	0.553288	0.37013	0.183158
cg05542681	NM_153350	FBXL16	0.00656681	0.276772	0.0941461	0.182626
cg21983531	NM_001163636;NM_032999;NM_033000;NM_033001;NM_001518	GTF2I;GTF2I;GTF2I;GTF2I;GTF2I	0.00132378	0.495808	0.313678	0.18213
cg13708645	NM_032590;NM_001005366	KDM2B;KDM2B	0.00182573	0.402733	0.220865	0.181868
cg01050273			2.29128e-05	0.487367	0.305663	0.181704
cg06394109			0.00820381	0.814108	0.634581	0.179527
cg15411840	NR_028595	CCDC162	0.00272801	0.311124	0.489956	-0.178832
cg26168224			6.45615e-05	0.648993	0.827652	-0.178659
cg16075649	NR_024433	LOC283663	0.000136777	0.49711	0.320606	0.176504
cg08861456	NM_175911	OR2L13	0.00214826	0.493734	0.317352	0.176382
cg21158528	NM_004619;NM_001033910	TRAF5;TRAF5	7.2074e-05	0.525228	0.34914	0.176087
cg07460842			0.00622935	0.212206	0.0369217	0.175284
cg26960322	NM_020311	CXCR7	0.000251303	0.622714	0.447739	0.174975
cg05856321			0.00120089	0.411835	0.237106	0.174729
cg25330422	NM_213662;NM_139276;NM_003150	STAT3;STAT3;STAT3	0.0029502	0.437067	0.262904	0.174163
cg13918228	NR_026671;NR_026672;NM_001781	CD69;CD69;CD69	0.000591527	0.24738	0.42147	-0.17409
cg23983453	NM_005654	NR2F1	0.00946756	0.204187	0.378179	-0.173992
cg21477985	NM_016584	IL23A	0.000626927	0.488044	0.314109	0.173935
cg10549986	NM_080657	RSAD2	2.90545e-05	0.287247	0.46097	-0.173724
cg02957270	NM_001075099;NM_003726	SKAP1;SKAP1	5.77757e-05	0.625326	0.798602	-0.173276
cg03626672	NM_020311	CXCR7	0.00318837	0.567571	0.394865	0.172706
cg16281534	NM_006317	BASP1	0.000336738	0.606639	0.434	0.172639
cg20006618	NM_003603;NM_021069;NM_001145670;NM_001145671;NM_001145672;NM_001145673	SORBS2;SORBS2;SORBS2;SORBS2;SORBS2;SORBS2	0.000251303	0.515259	0.342809	0.172449
cg14398557	NM_178578	PSMF1	0.00622935	0.510525	0.338646	0.171878
cg25585279			0.000370631	0.401152	0.229464	0.171688
cg08779649			0.00770052	0.515521	0.344289	0.171231
cg02303805	NM_004456;NM_152998	EZH2;EZH2	0.000305694	0.365755	0.195173	0.170582
cg02956248	NM_005155;NM_030651;NM_138717	PPT2;PRRT1;PPT2	0.000591527	0.667925	0.498348	0.169577
cg06313775	NM_001145317;NM_024918;NM_001145316;NM_001145318;NM_001145315	DSN1;DSN1;DSN1;DSN1;DSN1	0.0082544	0.611659	0.442206	0.169453
cg02394698	NM_001025616	ARHGAP24	0.000227564	0.300568	0.132209	0.168359
cg24995347	NM_001005176;NM_007237	SP140;SP140	0.000407605	0.630289	0.462163	0.168126
cg05649077			0.000258613	0.453193	0.620932	-0.167739
cg01859460	NM_004152	OAZ1	0.00232791	0.792289	0.625037	0.167252
cg16653991	NM_001144914;NM_001144915;NM_022970;NM_001144913;NM_001144916;NM_000141;NM_001144917;NM_001144919;NM_001144918	FGFR2;FGFR2;FGFR2;FGFR2;FGFR2;FGFR2;FGFR2;FGFR2;FGFR2	0.00400884	0.582467	0.749475	-0.167007
cg25988214	NM_001037984;NM_138570	SLC38A10;SLC38A10	0.000847879	0.46703	0.300081	0.166949
cg08428292			6.66743e-07	0.394247	0.227792	0.166455
cg23828876	NM_005017	PCYT1A	0.0066896	0.503449	0.337113	0.166336
cg13832372	NM_199160;NM_014368	LHX6;LHX6	0.000251303	0.374078	0.207754	0.166324
cg04012282	NM_001013650	PRR23B	0.00884283	0.637728	0.803897	-0.166169
cg09125779	NM_139212;NM_001145460;NM_032495	HOPX;HOPX;HOPX	0.0066896	0.546629	0.380545	0.166084
cg22324981	NM_006162;NM_172388;NM_172389;NM_172387	NFATC1;NFATC1;NFATC1;NFATC1	7.77731e-07	0.376664	0.210708	0.165957
cg15278374	NM_198827	GPR133	0.0029502	0.754211	0.588742	0.165469
cg03776082			0.00432125	0.323176	0.488593	-0.165417
cg27019717	NM_053064	GNG2	0.000847879	0.382614	0.547252	-0.164638
cg24118856	NM_001040664;NM_002566	PPAN-P2RY11;P2RY11	0.00122675	0.623225	0.458912	0.164313
cg16960758	NM_001171631;NM_052946;NM_001171632;NM_001039724	NOSTRIN;NOSTRIN;NOSTRIN;NOSTRIN	0.000847879	0.384073	0.548321	-0.164248
cg27317694	NM_001268	RCBTB2	0.00214826	0.643574	0.47933	0.164245
cg01860774	NM_006977	ZBTB25	0.00371664	0.417976	0.254088	0.163887
cg04168675	NM_014689	DOCK10	0.00110857	0.735616	0.571832	0.163784
cg06538345	NR_026712;NR_000020;NR_000018;NR_000019;NM_012423;NR_000021	RPL13AP5;SNORD33;SNORD35A;SNORD34;RPL13A;SNORD32A	0.000591527	0.705543	0.541821	0.163722
cg18831134	NM_001159746	ABR	0.000336738	0.633816	0.470242	0.163574
cg26047334	NM_022648	TNS1	0.00214826	0.383294	0.21982	0.163474
cg16519742	NM_001146326;NM_001146327;NM_015363	ZIM2;ZIM2;ZIM2	0.00622935	0.645636	0.808952	-0.163316
cg01815690	NM_001099743;NM_001099751;NM_001099752;NM_001099754;NM_001099753;NM_001099744;NM_001099748;NM_001099746;NM_001099747;NM_017786;NM_001099745;NM_001099756;NM_001099755;NM_001099749;NM_001099750	GOLSYN;GOLSYN;GOLSYN;GOLSYN;GOLSYN;GOLSYN;GOLSYN;GOLSYN;GOLSYN;GOLSYN;GOLSYN;GOLSYN;GOLSYN;GOLSYN;GOLSYN	0.00120089	0.591148	0.428381	0.162767
cg03678039	NM_134268	CYGB	0.00154733	0.72772	0.565193	0.162528
cg19956889	NM_014688	USP6NL	0.00221305	0.588791	0.426446	0.162345
cg21648069	NM_178039;NR_027948;NR_027949;NM_178040;NR_027946	ERC1;ERC1;ERC1;ERC1;ERC1	0.0066896	0.413524	0.575811	-0.162287
cg05720871	NM_001099743;NM_001099751;NM_001099752;NM_001099754;NM_001099753;NM_001099744;NM_001099748;NM_001099746;NM_001099747;NM_017786;NM_001099745;NM_001099756;NM_001099755;NM_001099749;NM_001099750	GOLSYN;GOLSYN;GOLSYN;GOLSYN;GOLSYN;GOLSYN;GOLSYN;GOLSYN;GOLSYN;GOLSYN;GOLSYN;GOLSYN;GOLSYN;GOLSYN;GOLSYN	0.000647979	0.408823	0.246974	0.161849
cg25545500	NM_001002907	OR8K1	0.00101055	0.545497	0.383681	0.161816
cg23216724	NM_005299	GPR31	0.00120089	0.554118	0.392958	0.16116
cg25654695	NM_004152	OAZ1	0.00246675	0.708783	0.547692	0.161091
cg23035449	NM_198526	ZNF710	0.000136777	0.580587	0.741526	-0.160938
cg23895722	NM_145013;NM_000890	C11orf45;KCNJ5	0.000539576	0.416278	0.577163	-0.160885
cg19634573	NM_014661	FAM53B	0.000539576	0.443814	0.604597	-0.160783
cg14703454	NM_007072	HHLA2	0.0029502	0.42339	0.584088	-0.160698
cg15206834	NM_031438	NUDT12	0.00318837	0.258561	0.419254	-0.160693
cg05688618	NM_001025616;NM_001042669;NM_001042669	ARHGAP24;ARHGAP24;ARHGAP24	0.00110857	0.354034	0.193725	0.160309
cg27583922	NM_145057	CDC42EP5	0.00120089	0.548201	0.387993	0.160208
cg00464046	NR_024185;NR_024186;NM_024033	C7orf49;C7orf49;C7orf49	0.00371664	0.483995	0.323816	0.160179
cg00925492			3.81861e-06	0.539926	0.699424	-0.159498
cg25953417	NM_178014	TUBB	0.000370631	0.475695	0.316361	0.159334
cg27046335	NM_000949	PRLR	0.000336738	0.468275	0.627458	-0.159184
cg13844463	NM_004171	SLC1A2	0.000123209	0.381992	0.223288	0.158704
cg15947697	NR_026816	PSORS1C3	0.00232791	0.364571	0.206026	0.158545
cg24956391	NM_198291;NM_005417	SRC;SRC	2.89698e-06	0.788524	0.630002	0.158522
cg04370983	NM_006265	RAD21	0.00455336	0.35293	0.194479	0.158451
cg00540464			0.00120089	0.606439	0.448464	0.157975
cg08090385			0.00101055	0.902823	0.74492	0.157903
cg23948811			0.000336738	0.612036	0.454337	0.157699
cg14040931	NM_005476;NM_001128227	GNE;GNE	0.00377445	0.713947	0.556377	0.15757
cg26020695	NM_198849	SIAH3	0.00110202	0.690309	0.847805	-0.157496
cg11423096	NM_016290	UIMC1	0.00101353	0.449173	0.291736	0.157437
cg23304647	NM_007353	GNA12	0.00272801	0.359177	0.516372	-0.157195
cg00110545			0.000925989	0.532691	0.375562	0.157129
cg19861842	NM_001160036;NM_015178;NM_001160037	RHOBTB2;RHOBTB2;RHOBTB2	0.00717946	0.355055	0.197972	0.157083
cg14325436	NM_024527	ABHD8	0.000539576	0.73433	0.577374	0.156956
cg02450064	NM_024119	DHX58	2.03143e-05	0.294785	0.138288	0.156498
cg21787323	NM_018480;NM_001142699	TMEM126B;DLG2	0.00432125	0.388263	0.54454	-0.156278
cg08832695	NR_033203;NR_033205;NR_033204;NR_033201;NM_018952;NR_033202	LOC404266;LOC404266;LOC404266;LOC404266;HOXB6;LOC404266	0.000223716	0.376639	0.532896	-0.156257
cg22809047	NM_001099693;NM_000993;NM_001098577	RPL31;RPL31;RPL31	0.00214826	0.652491	0.808703	-0.156212
cg27395654	NM_004198	CHRNA6	0.000434933	0.399962	0.243859	0.156103
cg02787852	NM_181079;NM_181078;NM_181079	IL21R;IL21R;IL21R	0.000539576	0.47792	0.322043	0.155877
cg05365532	NM_006669	LILRB1	0.000491803	0.448075	0.292565	0.15551
cg01787084	NR_024568;NM_024735	FBXO31;FBXO31	0.000336738	0.212805	0.368144	-0.155339
cg12076931	NM_017617	NOTCH1	0.000447907	0.333177	0.488479	-0.155302
cg17934470			0.000925989	0.377873	0.533027	-0.155154
cg00428382			2.03143e-05	0.677477	0.832387	-0.154911
cg13282971	NM_024060;NM_001620	AHNAK;AHNAK	0.00770052	0.573101	0.418283	0.154818
cg22575379	NR_027766;NR_002949	NUDT16P;NUDT16P	0.000110886	0.325015	0.479704	-0.154689
cg20005518	NM_018042;NM_018042	SLFN12;SLFN12	0.00371664	0.35099	0.196436	0.154553
cg07218880	NM_080687;NM_023011	UPF3A;UPF3A	0.00717946	0.459423	0.304912	0.154511
cg01940297	NR_031612;NR_003367	MIR1207;PVT1	0.00339846	0.614689	0.460197	0.154492
cg01965673			0.000305694	0.572164	0.418217	0.153946
cg17990365	NM_021034	IFITM3	0.000227564	0.64004	0.793929	-0.153889
cg03649060	NM_032377	ELOF1	0.00318837	0.42372	0.26984	0.15388
cg22052056	NM_175849;NM_006892;NM_175848	DNMT3B;DNMT3B;DNMT3B	0.000491803	0.512809	0.666611	-0.153803
cg00022997			0.00465502	0.629134	0.782801	-0.153668
cg14255337	NM_032590;NM_001005366	KDM2B;KDM2B	0.00214826	0.409624	0.25626	0.153364
cg21794222	NM_004367;NM_031409	CCR6;CCR6	0.00371664	0.349215	0.195899	0.153317
cg02048922	NM_001702	BAI1	0.00714027	0.6509	0.497674	0.153226
cg19951006	NM_016584	IL23A	5.77757e-05	0.347713	0.1945	0.153213
cg20334079	NM_148957	TNFRSF19	0.00198112	0.467406	0.620533	-0.153127
cg11003133	NM_004833	AIM2	0.00110202	0.527696	0.374579	0.153118
cg13200575			0.00539169	0.254425	0.40753	-0.153106
cg00394261	NM_000163	GHR	8.03836e-05	0.581276	0.428228	0.153048
cg18567954	NM_004416	DTX1	3.26654e-05	0.682466	0.529756	0.152709
cg01876338	NM_006794;NM_001164165;NM_006794	GPR75;LOC100302652;GPR75	0.00120089	0.709214	0.861895	-0.15268
cg25947970			0.000925989	0.44999	0.602532	-0.152542
cg05496603	NM_001137560	TMEM151B	0.0029502	0.712199	0.864492	-0.152294
cg14778922	NM_014228	SLC6A7	0.00717946	0.578012	0.425758	0.152254
cg19666600	NM_001164372;NM_013300	GPN3;C12orf24	0.00829162	0.691985	0.539804	0.152181
cg24757755	NR_003531;NR_003530;NR_002766	MEG3;MEG3;MEG3	0.000370631	0.570684	0.418742	0.151942
cg18963065	NM_203281;NM_001721	BMX;BMX	9.97036e-05	0.512531	0.664233	-0.151703
cg10372770			0.0057972	0.706006	0.857641	-0.151635
cg13095698	NM_001012980;NM_001163541	SATL1;SATL1	0.0066896	0.719803	0.871232	-0.151428
cg10426581	NM_001128852;NM_015908;NM_001128854;NM_001128853	SRRT;SRRT;SRRT;SRRT	8.03836e-05	0.381393	0.230075	0.151318
cg16555533	NM_031849;NM_018905;NM_031411;NM_031857;NM_018910;NM_018900;NM_018909;NM_018908;NM_018901;NM_018906;NM_018907;NM_031860;NM_018911	PCDHA6;PCDHA2;PCDHA1;PCDHA9;PCDHA7;PCDHA1;PCDHA6;PCDHA5;PCDHA10;PCDHA3;PCDHA4;PCDHA10;PCDHA8	0.00252088	0.721077	0.872373	-0.151296
cg01664151	NM_015082	FSTL4	0.00232791	0.645005	0.493792	0.151213
cg14115756	NM_005294;NM_012197	GPR21;RABGAP1	0.00232791	0.289969	0.441167	-0.151198
cg15555017	NM_001143820	ETS1	0.00120089	0.515272	0.666469	-0.151196
cg15907473	NM_180989	GPR180	0.00110857	0.67664	0.827812	-0.151172
cg09277575	NM_005989	AKR1D1	8.03836e-05	0.353712	0.202739	0.150973
cg14847626	NM_006312;NM_001077261	NCOR2;NCOR2	0.000232965	0.643527	0.492603	0.150924
cg08946713	NM_139266;NM_007315	STAT1;STAT1	0.0057972	0.32661	0.4775	-0.15089
cg09122035			0.00120089	0.483588	0.63403	-0.150441
cg04341806	NM_002298	LCP1	0.000227564	0.387221	0.237055	0.150166
cg02522485	NM_001165928;NM_004393	DAG1;DAG1	0.00432125	0.227402	0.377564	-0.150162
cg02419321	NM_002205	ITGA5	0.00318837	0.201211	0.351349	-0.150139
cg14353508	NM_003116	SPAG4	0.00142298	0.535504	0.385443	0.15006
cg26253663			0.000227564	0.320006	0.469993	-0.149987
cg22327338	NM_003550;NM_001013837;NM_001013836	MAD1L1;MAD1L1;MAD1L1	0.00252088	0.390055	0.240215	0.14984
cg25614875	NM_206594;NM_206595;NM_001134285	ESRRG;ESRRG;ESRRG	0.000539576	0.661085	0.810608	-0.149523
cg26589669	NM_183239	GSTO2	0.00232791	0.502351	0.353367	0.148984
cg06893362	NR_003605;NR_003606;NR_003030;NR_003604	C20orf199;C20orf199;SNORD12;C20orf199	0.000925989	0.548141	0.399164	0.148976
cg11724461	NM_147152;NM_019595;NM_006277	ITSN2;ITSN2;ITSN2	0.0013077	0.609154	0.46028	0.148874
cg08792630	NM_001455;NM_201559	FOXO3;FOXO3	0.00142298	0.333162	0.481932	-0.148771
cg10575219	NM_020725;NM_138495	ATXN7L1;ATXN7L1	0.00120089	0.277733	0.426453	-0.14872
cg13461447			0.00142298	0.384537	0.235843	0.148694
cg21887193	NM_001042535;NM_031946	AGAP3;AGAP3	0.00491617	0.184867	0.333556	-0.148689
cg17980508	NM_006820	IFI44L	0.000168109	0.244294	0.392963	-0.148669
cg09633240			8.03836e-05	0.586568	0.4382	0.148367
cg07277549	NM_006092	NOD1	0.000151703	0.449397	0.597726	-0.148329
cg11884933	NM_007353	GNA12	0.00101055	0.273717	0.421872	-0.148156
cg22450991			0.00246929	0.575458	0.427384	0.148074
cg18123677	NM_005025;NM_001122752	SERPINI1;SERPINI1	0.00272801	0.316516	0.464329	-0.147814
cg01028142	NM_207315	CMPK2	1.5915e-05	0.741182	0.88894	-0.147757
cg18595258	NR_028473;NM_153611;NM_001161454;NM_016464	TMEM138;CYBASC3;CYBASC3;TMEM138	0.0029502	0.385877	0.238153	0.147724
cg09152866	NM_032744;NM_001143948	C6orf105;C6orf105	0.00110202	0.413194	0.265558	0.147636
cg00898157			0.00357103	0.34242	0.489961	-0.147542
cg16332065	NM_173536	GABRG1	0.00540516	0.510287	0.657571	-0.147284
cg08726900	NM_013275	ANKRD11	0.00706309	0.213567	0.360697	-0.14713
cg03271761	NM_147182;NM_001035003;NM_001035003	KCNIP4;KCNIP4;KCNIP4	0.00168136	0.439552	0.586665	-0.147112
cg22825261	NM_172131;NM_172005;NM_172006	WFDC10B;WFDC13;WFDC10B	5.16524e-05	0.296197	0.149212	0.146985
cg07268332	NM_001025389;NM_001025390;NM_000480	AMPD3;AMPD3;AMPD3	0.00154733	0.583945	0.437013	0.146932
cg07855456	NM_031451	TEX101	0.00622935	0.703999	0.850917	-0.146918
cg08175413	NM_005575;NM_175920;NM_175920	LNPEP;LNPEP;LNPEP	0.00168136	0.451043	0.304471	0.146572
cg10149533			6.45615e-05	0.476095	0.622507	-0.146412
cg24367957			3.33649e-06	0.688917	0.542621	0.146296
cg05768044	NM_025134	CHD9	0.000591527	0.293614	0.439901	-0.146287
cg19438750	NM_001167580;NM_014848	SV2B;SV2B	0.000205893	0.536866	0.390583	0.146283
cg00767496	NR_033252;NM_001482	LOC145663;GATM	0.000491803	0.410073	0.263992	0.146082
cg09729012			0.00770052	0.411507	0.557557	-0.14605
cg01324550	NR_033203;NR_033205;NR_033204;NR_033201;NM_018952;NR_033202	LOC404266;LOC404266;LOC404266;LOC404266;HOXB6;LOC404266	0.0029502	0.31287	0.458837	-0.145967
cg24919348	NR_030329;NM_017890;NM_152564;NR_030596	MIR599;VPS13B;VPS13B;MIR875	0.000775778	0.321746	0.46762	-0.145874
cg16659497			0.00232791	0.649744	0.795593	-0.145849
cg08899523	NM_001144914;NM_001144915;NM_022970;NM_001144913;NM_001144916;NM_000141;NM_001144917;NM_001144919;NM_001144918	FGFR2;FGFR2;FGFR2;FGFR2;FGFR2;FGFR2;FGFR2;FGFR2;FGFR2	0.00272801	0.631431	0.777266	-0.145835
cg13388731	NM_001039550;NM_006736	DNAJB2;DNAJB2	0.000775778	0.4439	0.298074	0.145826
cg27295342			0.000647979	0.318382	0.463928	-0.145546
cg19402236	NM_001159920;NM_001160030;NM_002019;NM_001160031	FLT1;FLT1;FLT1;FLT1	0.000136777	0.335098	0.480606	-0.145508
cg06567596	NM_014916	LMTK2	0.000775778	0.59183	0.446348	0.145482
cg05481257	NM_182828	GDF7	0.0066896	0.474294	0.619697	-0.145403
cg02351362	NR_027463	SHBG	0.0082544	0.618751	0.764088	-0.145337
cg12288551	NM_001001555;NM_005311;NM_001001549	GRB10;GRB10;GRB10	0.00344351	0.603123	0.457865	0.145257
cg00726046	NM_007066;NM_181805;NM_181804	PKIG;PKIG;PKIG	0.000277283	0.561682	0.706912	-0.145231
cg15723874	NM_005920	MEF2D	0.00232791	0.335929	0.19074	0.145189
cg08450021			0.0029502	0.397004	0.251922	0.145083
cg24375364	NM_133463	AMZ1	0.000647979	0.306242	0.451253	-0.145011
cg23330450			0.00318837	0.415638	0.270668	0.144969
cg05280336	NM_004610	TCP10	0.00622935	0.615049	0.759899	-0.14485
cg22764289	NM_017786;NM_001099755;NM_001099745;NM_001099748;NM_001099744;NM_001099753;NM_001099746;NM_001099747;NM_001099756;NM_001099752;NM_001099750;NM_001099749;NM_001099754;NM_001099751;NM_001099743	GOLSYN;GOLSYN;GOLSYN;GOLSYN;GOLSYN;GOLSYN;GOLSYN;GOLSYN;GOLSYN;GOLSYN;GOLSYN;GOLSYN;GOLSYN;GOLSYN;GOLSYN	0.000227564	0.808727	0.664015	0.144713
cg13749113			0.00320937	0.609839	0.754471	-0.144633
cg05279387	NM_144704;NM_001018060;NR_027464;NM_001146288	AIFM3;AIFM3;AIFM3;AIFM3	0.000591527	0.585905	0.441369	0.144537
cg01367992	NM_001033667;NM_002348	LY9;LY9	0.000251303	0.628592	0.4841	0.144492
cg11498582	NM_014641	MDC1	0.00132378	0.731626	0.587149	0.144478
cg18403080			0.000925989	0.505129	0.649359	-0.144231
cg07700233			0.00101055	0.290886	0.434868	-0.143982
cg10403394	NM_001018007;NM_001018020;NM_001018004;NM_001018005;NM_000366;NM_001018008;NM_001018006	TPM1;TPM1;TPM1;TPM1;TPM1;TPM1;TPM1	2.18556e-06	0.461359	0.605281	-0.143923
cg22221831	NM_000900	MGP	0.000925989	0.591251	0.735051	-0.1438
cg25983544	NM_144662;NM_001025097;NM_001025096	PSMA8;PSMA8;PSMA8	0.000591527	0.697564	0.841355	-0.143791
cg23001905			0.00272801	0.49227	0.348558	0.143712
cg18081818			0.000370631	0.70238	0.846018	-0.143638
cg14409029	NM_001001483;NM_019028	ZDHHC13;ZDHHC13	0.00501141	0.42234	0.278878	0.143462
cg19127638	NM_030625	TET1	6.45615e-05	0.701541	0.844675	-0.143134
cg25150953	NM_014988;NM_001112718;NM_001112717	LIMCH1;LIMCH1;LIMCH1	0.000123209	0.232084	0.375178	-0.143094
cg08707963	NM_007368	RASA3	0.004681	0.841102	0.6981	0.143002
cg05254518	NM_144767;NM_007200;NM_006738	AKAP13;AKAP13;AKAP13	0.00198112	0.390001	0.247089	0.142912
cg14273027	NM_020866;NR_002717	KLHL1;ATXN8OS	0.000647979	0.359177	0.501981	-0.142805
cg22747380	NM_000127	EXT1	1.79907e-05	0.386041	0.52874	-0.142699
cg17831117			0.000370631	0.550992	0.693499	-0.142507
cg09709457	NM_152531	C3orf21	0.000847879	0.256722	0.399218	-0.142497
cg06157561	NM_001163264;NM_001163264	PCYT1B;PCYT1B	0.00110202	0.736296	0.878767	-0.142471
cg15320998	NM_012256	ZNF212	0.00432125	0.442446	0.300034	0.142412
cg26450717			0.00884283	0.305763	0.44813	-0.142367
cg19071879	NM_001025108;NM_002285	AFF3;AFF3	0.00110202	0.78524	0.642874	0.142366
cg19739906	NM_001024075;NM_001024074;NM_006895	HNMT;HNMT;HNMT	2.29128e-05	0.524079	0.666372	-0.142293
cg12816198	NM_001098630;NM_032643;NM_001098629;NM_001098628;NM_001098631;NM_002200	IRF5;IRF5;IRF5;IRF5;IRF5;IRF5	0.00232791	0.545017	0.402742	0.142276
cg04247928			0.000647979	0.78524	0.643009	0.142231
cg08736883			0.00214826	0.560839	0.418842	0.141997
cg26573382	NM_001037132;NM_005010	NRCAM;NRCAM	0.000647979	0.439192	0.297267	0.141924
cg03730314			0.000193354	0.566264	0.424387	0.141877
cg16777090	NM_022094	CIDEC	0.00245962	0.560325	0.418524	0.141801
cg17460183	NM_153034	ZNF488	0.00400884	0.481322	0.339571	0.141751
cg13100118	NM_004930	CAPZB	0.000168109	0.392033	0.250364	0.141668
cg10177030	NR_003605;NR_003606;NR_003030;NR_003604	C20orf199;C20orf199;SNORD12;C20orf199	0.000647979	0.663795	0.522141	0.141655
cg12646029	NM_030883	OR2H1	0.00622935	0.534366	0.392838	0.141528
cg25290779			0.00182573	0.508729	0.367471	0.141257
cg11475300	NM_001830	CLCN4	0.00168136	0.661294	0.802525	-0.141231
cg07431973	NM_152330;NM_001042481	FRMD6;FRMD6	0.00371664	0.637895	0.496842	0.141052
cg24168221	NM_001008693	CST9	0.000277283	0.402732	0.261805	0.140928
cg13581527			0.000186125	0.300829	0.159918	0.14091
cg08608952	NM_001039802;NM_001791;NM_044472	CDC42;CDC42;CDC42	0.000186125	0.401403	0.2605	0.140903
cg08003321	NM_001142633;NM_014308	PIK3R5;PIK3R5	0.000775778	0.368685	0.227797	0.140888
cg25582669	NM_014305	TGDS	0.0016919	0.3824	0.241534	0.140866
cg12590535			0.00622935	0.56075	0.419889	0.140861
cg23003085	NM_012094;NM_181652;NM_016404;NM_181651	PRDX5;PRDX5;TRMT112;PRDX5	0.000539576	0.442798	0.301993	0.140805
cg22022379	NM_001145809;NM_001077186;NM_024729	MYH14;MYH14;MYH14	0.000168109	0.336433	0.195643	0.140789
cg18960324			0.00101055	0.282283	0.42302	-0.140737
cg04080448	NR_024037	RMST	0.0029502	0.486495	0.627166	-0.14067
cg16240368	NM_206996	SPAG17	0.000227564	0.377947	0.518378	-0.14043
cg21878650	NM_197941	ADAMTS6	0.00344351	0.320306	0.460592	-0.140286
cg21855816	NM_001134395;NM_032350;NM_001134396	C7orf50;C7orf50;C7orf50	0.00272801	0.563027	0.703291	-0.140264
cg05780543	NM_001142466;NM_133443	GPT2;GPT2	1.24118e-05	0.361055	0.220798	0.140257
cg06460587			0.00884283	0.46085	0.601097	-0.140247
cg18075666	NM_033157;NM_004342;NM_033138	CALD1;CALD1;CALD1	0.000775778	0.612914	0.472704	0.140209
cg08039084	NR_031680	MIR548H4	0.00120089	0.803758	0.663551	0.140207
cg03889700	NM_001119;NM_014190;NM_014189;NM_176801	ADD1;ADD1;ADD1;ADD1	0.00770052	0.49832	0.638526	-0.140206
cg26562772	NM_144728;NM_007207;NM_144729	DUSP10;DUSP10;DUSP10	0.00182573	0.270676	0.410725	-0.140049
cg03201337			0.000186125	0.730705	0.590893	0.139812
cg00374717	NM_014960	ARSG	0.00400884	0.493796	0.633592	-0.139796
cg01357222			0.000251303	0.661512	0.801198	-0.139686
cg14137381	NM_004174	SLC9A3	0.00432125	0.444077	0.304412	0.139665
cg02058408			0.00240465	0.540727	0.401082	0.139645
cg15134506	NM_152586	USP54	0.00154733	0.628441	0.488808	0.139633
cg23950233	NM_003782	B3GALT4	0.000925989	0.375492	0.235886	0.139606
cg05837855	NM_203315	BDH1	0.00946756	0.554175	0.414629	0.139546
cg02349186			0.000336738	0.300235	0.160781	0.139454
cg01854491	NM_198488	FAM83H	0.00101055	0.673586	0.534169	0.139417
cg26328687	NM_032427	MAML2	0.00168136	0.470606	0.331189	0.139417
cg26710619			0.00186028	0.583451	0.722743	-0.139291
cg27201625	NM_006257	PRKCQ	0.0082544	0.40713	0.267955	0.139175
cg13499923			0.00101055	0.66484	0.803929	-0.139088
cg14843888	NM_001128839;NM_000720;NM_001128840	CACNA1D;CACNA1D;CACNA1D	0.00432125	0.767412	0.628439	0.138973
cg05076730	NR_031612;NR_003367	MIR1207;PVT1	0.00198112	0.475897	0.337141	0.138755
cg09849319	NM_024830	LPCAT1	0.0057972	0.456154	0.317482	0.138672
cg21105955	NM_014641	MDC1	0.0057972	0.478862	0.34019	0.138672
cg10211414	NM_012102;NM_001042681	RERE;RERE	0.00539169	0.426512	0.565131	-0.138619
cg05957749	NM_015038;NM_015038;NM_012090;NM_033044	KIAA0754;KIAA0754;MACF1;MACF1	0.000407605	0.449909	0.588487	-0.138578
cg14423778	NM_207292;NM_021038;NR_027038;NR_027037	MBNL1;MBNL1;LOC401093;LOC401093	0.00400884	0.430963	0.569521	-0.138558
cg07114810			0.00214826	0.381656	0.243159	0.138497
cg26275799			0.00182573	0.463552	0.325078	0.138474
cg20863321	NM_005336	HDLBP	0.00884283	0.545005	0.406867	0.138138
cg08024174			0.000775778	0.427356	0.289254	0.138101
cg24389386	NR_001434	HLA-H	0.00951137	0.578477	0.716554	-0.138077
cg02569509			0.000709274	0.528383	0.6664	-0.138017
cg02625222	NM_173689	CRB2	0.00400884	0.698387	0.560551	0.137836
cg23840027	NM_203342;NM_203343;NM_004437;NM_001166007;NM_001166005	EPB41;EPB41;EPB41;EPB41;EPB41	0.00717946	0.387714	0.5255	-0.137786
cg03962217	NR_028090	LOC202781	0.0029502	0.368181	0.230424	0.137757
cg18156471	NM_001884	HAPLN1	0.0029502	0.506938	0.369189	0.137749
cg14412134	NM_005956	MTHFD1	0.0013077	0.48995	0.352279	0.137672
cg04993279			0.00344351	0.441437	0.579079	-0.137641
cg04747693			0.000647979	0.606866	0.744502	-0.137636
cg08822136			0.00252088	0.683563	0.545928	0.137636
cg14241836			0.0013077	0.522624	0.384997	0.137626
cg18311708	NR_027789;NR_027788	ZNF767;ZNF767	0.00110857	0.424684	0.287102	0.137582
cg17910564	NM_001135694;NM_005662	VDAC3;VDAC3	0.000407605	0.523624	0.386059	0.137565
cg01720520	NM_006669	LILRB1	0.000925989	0.562777	0.425242	0.137535
cg09379146	NM_015508	TIPARP	0.00622935	0.600441	0.737876	-0.137435
cg12394014	NM_006791;NM_206839	MORF4L1;MORF4L1	2.89698e-06	0.759861	0.622429	0.137432
cg09197761	NM_001002844;NM_017661;NM_001002843	ZNF280D;ZNF280D;ZNF280D	0.00272801	0.719587	0.856972	-0.137384
cg16190732	NM_001127895;NM_001127895;NM_001127896;NM_001127896	CHST8;CHST8;CHST8;CHST8	0.000925989	0.205122	0.342402	-0.137279
cg17381692			0.0066896	0.687509	0.824672	-0.137164
cg04847110			0.00501141	0.376091	0.513222	-0.137132
cg19404979	NM_022142;NM_022142	ELSPBP1;ELSPBP1	0.000934316	0.499084	0.362023	0.137061
cg01757168			0.00110202	0.620931	0.757979	-0.137048
cg01561629	NM_024586;NM_148906;NM_148908;NM_148909	OSBPL9;OSBPL9;OSBPL9;OSBPL9	0.00120089	0.648997	0.785971	-0.136974
cg08964643			0.000407605	0.715842	0.852664	-0.136823
cg09800105			2.03143e-05	0.684491	0.8213	-0.136808
cg04931184	NM_152868;NM_004981	KCNJ4;KCNJ4	0.000775778	0.381619	0.244841	0.136778
cg02039987	NM_001083112	GPD2	0.000110886	0.476036	0.339347	0.136689
cg10361005			0.00182573	0.262003	0.39866	-0.136657
cg17333973	NM_000218;NM_181798	KCNQ1;KCNQ1	0.000898278	0.289385	0.425926	-0.136541
cg13252540	NM_001012337	ROPN1B	0.0029502	0.459522	0.595915	-0.136393
cg21031692	NM_001171174;NM_001171171;NM_001171172;NM_001337	CX3CR1;CX3CR1;CX3CR1;CX3CR1	0.00232791	0.637142	0.773514	-0.136372
cg00204748	NM_018099;NM_018099	FAR2;FAR2	0.000775778	0.687282	0.551	0.136282
cg04654299			0.0013077	0.332592	0.468761	-0.136169
cg22657044	NM_018683	RNF114	0.00400884	0.773546	0.637595	0.135951
cg06813419	NM_004619;NM_001033910	TRAF5;TRAF5	0.00318837	0.650831	0.514983	0.135848
cg17157198	NM_006060	IKZF1	0.00339846	0.580072	0.444308	0.135764
cg09978023	NM_002927;NM_144766	RGS13;RGS13	0.00501141	0.54824	0.412545	0.135694
cg01800148	NM_001135585;NR_024180;NM_003039	SLC2A5;SLC2A5;SLC2A5	0.0057972	0.301103	0.436736	-0.135632
cg04495993	NM_018967	SNTG1	0.000205893	0.628464	0.764025	-0.135561
cg26430986	NM_014211	GABRP	0.00620609	0.520418	0.384917	0.135501
cg02723617	NM_004935;NM_001164410;NM_003040	CDK5;CDK5;SLC4A2	0.00371664	0.386575	0.251087	0.135489
cg23615741			0.000227564	0.471981	0.607462	-0.135482
cg16372051	NM_005346	HSPA1B	0.00465502	0.384631	0.249193	0.135438
cg25417675			0.000491803	0.56681	0.702079	-0.135269
cg24951886	NM_152751;NM_001100912	BEND7;BEND7	0.000407605	0.57788	0.442736	0.135143
cg26781129	NM_001134441;NM_001134440;NM_001134442;NM_033210	ZNF502;ZNF502;ZNF502;ZNF502	0.00455336	0.398284	0.533391	-0.135107
cg23659134	NM_183239	GSTO2	0.000407605	0.7359	0.87096	-0.135061
cg21964798	NM_024830	LPCAT1	0.00539169	0.757914	0.62286	0.135054
cg17654050	NM_006186	NR4A2	8.03836e-05	0.533977	0.669029	-0.135053
cg02722434			0.00154733	0.706506	0.841549	-0.135042
cg15919066	NM_003877	SOCS2	0.00198112	0.627894	0.762935	-0.135041
cg19766471	NR_024621;NM_139022;NM_001142946	C11orf21;TSPAN32;C11orf21	1.79907e-05	0.336507	0.20152	0.134987
cg22168489	NM_144668	WDR66	0.0057972	0.66129	0.796272	-0.134982
cg19491207	NM_018968	SNTG2	4.53949e-05	0.529802	0.394833	0.134969
cg20457732			0.000539576	0.403784	0.53862	-0.134836
cg27333886	NM_001145714;NM_001145713;NR_027280;NM_005500	SAE1;SAE1;SAE1;SAE1	0.00198112	0.383452	0.248635	0.134817
cg26531286	NM_001001715;NM_005766	FARP1;FARP1	0.0082544	0.492662	0.357851	0.134811
cg09035930	NM_145648	SLC15A4	0.00214826	0.570911	0.436294	0.134616
cg16707952	NM_001954;NM_013993	DDR1;DDR1	0.000370631	0.548549	0.413963	0.134586
cg22508831	NM_001024843;NM_001162501;NM_015088	TNRC6B;TNRC6B;TNRC6B	0.0082544	0.378409	0.243848	0.134561
cg01916685	NR_027786	SERHL	0.0029502	0.410112	0.544628	-0.134516
cg09977847	NM_021141	XRCC5	0.00465502	0.572224	0.437718	0.134506
cg24700494	NM_014641	MDC1	0.000205893	0.584526	0.450095	0.134431
cg05702052	NM_024942	C10orf88	0.00946756	0.648331	0.782752	-0.134421
cg12498580			0.00501141	0.399935	0.265551	0.134384
cg00214171	NM_004259;NM_001162997	RECQL5;LOC100130933	0.00110202	0.45436	0.588738	-0.134379
cg25641145	NM_198401	ANKRD46	0.00717946	0.493629	0.359283	0.134345
cg21073212	NM_004798	KIF3B	0.000847879	0.449597	0.315254	0.134343
cg21448423	NM_015547;NM_015547;NM_147161;NM_147161	ACOT11;ACOT11;ACOT11;ACOT11	0.0057972	0.479433	0.613756	-0.134322
cg06949933	NM_152392	AHSA2	0.00539169	0.507433	0.373114	0.134318
cg21097733	NM_002145	HOXB2	6.52956e-06	0.674906	0.809141	-0.134236
cg13692134			0.00371664	0.55554	0.689695	-0.134155
cg20536364			0.000370631	0.688584	0.822731	-0.134147
cg21908420	NM_144728;NM_007207;NM_144729	DUSP10;DUSP10;DUSP10	0.00232135	0.826881	0.692788	0.134093
cg23507953	NM_002146	HOXB3	9.97036e-05	0.377071	0.511152	-0.134082
cg01662650	NM_206923;NM_015884	YY2;MBTPS2	0.00101055	0.629606	0.763544	-0.133938
cg14118850	NM_002149;NM_134421	HPCAL1;HPCAL1	4.6132e-05	0.624495	0.758393	-0.133899
cg05994974	NM_022750	PARP12	0.000136777	0.433273	0.567082	-0.133809
cg26405097	NM_004973	JARID2	0.0013077	0.482946	0.616742	-0.133796
cg17715243	NM_014023	WDR37	0.00049451	0.702772	0.568992	0.13378
cg21611682	NM_002335	LRP5	0.000591527	0.35251	0.218746	0.133763
cg00568164	NM_130783;NM_001031730	TSPAN18;TSPAN18	0.0013077	0.431889	0.298174	0.133715
cg24082526	NR_026712;NR_000020;NR_000018;NR_000019;NM_012423;NR_000021	RPL13AP5;SNORD33;SNORD35A;SNORD34;RPL13A;SNORD32A	0.00371664	0.627322	0.493658	0.133664
cg04913265	NM_032801	JAM3	0.0057972	0.723421	0.589876	0.133545
cg21771569	NM_003159	CDKL5	0.0066896	0.455086	0.588581	-0.133494
cg08189198	NM_182946;NM_020921;NM_182944;NM_016350;NM_016350	NIN;NIN;NIN;NIN;NIN	0.00432125	0.447945	0.314481	0.133464
cg17093478	NM_031849;NM_018905;NM_031411;NM_031857;NM_018910;NM_018900;NM_018909;NM_018908;NM_018901;NM_018906;NM_018907;NM_031860;NM_018911	PCDHA6;PCDHA2;PCDHA1;PCDHA9;PCDHA7;PCDHA1;PCDHA6;PCDHA5;PCDHA10;PCDHA3;PCDHA4;PCDHA10;PCDHA8	0.000447907	0.631277	0.764736	-0.133459
cg15590007	NM_000698	ALOX5	9.97036e-05	0.480285	0.346849	0.133435
cg16660091	NM_000078;NM_000078	CETP;CETP	0.000151703	0.400088	0.533506	-0.133418
cg01843999			0.000205893	0.511675	0.378257	0.133418
cg23926543	NM_000124	ERCC6	0.00142298	0.734766	0.601357	0.13341
cg15625636	NM_003608	GPR65	0.000123209	0.619945	0.486538	0.133408
cg21257293			0.00182573	0.335468	0.468839	-0.133371
cg09004241	NM_145236	B3GNT7	0.00318837	0.269575	0.136216	0.133359
cg24796651	NM_018115	SDAD1	0.0022798	0.35716	0.223862	0.133298
cg13750264	NM_001083909	GPR123	0.00770052	0.604683	0.47156	0.133123
cg04265188			6.45615e-05	0.725207	0.85831	-0.133104
cg07833467	NM_138433;NM_138433	KLHDC7B;KLHDC7B	0.0057972	0.205812	0.338907	-0.133095
cg26761826	NM_152765	C8orf46	0.00884283	0.518991	0.385907	0.133084
cg05007126	NM_080489	SDCBP2	0.000370631	0.493255	0.360253	0.133002
cg15257836			0.00182573	0.432009	0.299038	0.132971
cg17326451	NM_021151;NR_015381;NR_026585;NM_001143935	CROT;TP53TG1;CROT;CROT	0.00770052	0.447095	0.58006	-0.132966
cg04557294	NM_014734	KIAA0247	0.000775778	0.585398	0.452467	0.132931
cg23189175	NM_001702	BAI1	0.000709274	0.760097	0.627174	0.132923
cg07441152	NM_198488	FAM83H	0.00160136	0.673516	0.54064	0.132876
cg18399451	NM_001128164;NM_000332	ATXN1;ATXN1	0.00717946	0.619214	0.486435	0.132779
cg17573270	NM_014509	SERHL2	0.00318837	0.838324	0.705579	0.132745
cg06738887	NM_001136015;NM_004039;NM_001002858;NM_001002857	ANXA2;ANXA2;ANXA2;ANXA2	0.00168136	0.420697	0.553349	-0.132652
cg11472424	NM_002625;NM_002625	PFKFB1;PFKFB1	0.00182573	0.483457	0.616096	-0.132639
cg07813142	NM_001003845	SP5	0.000186125	0.144102	0.276737	-0.132635
cg25308322			0.0057972	0.528855	0.396234	0.132621
cg19546057	NM_145013;NM_000890	C11orf45;KCNJ5	0.000407605	0.305182	0.437736	-0.132554
cg18826274			0.00432125	0.560997	0.428459	0.132538
cg21572897	NM_005191	CD80	0.00120089	0.604566	0.472262	0.132304
cg20228731	NR_015431;NR_024153	FLJ43663;FLJ43663	0.00465502	0.457452	0.325185	0.132266
cg04864179	NM_001098630;NM_001098627;NM_032643;NM_001098631;NM_002200;NM_001098629;NM_001098628	IRF5;IRF5;IRF5;IRF5;IRF5;IRF5;IRF5	0.00120089	0.389167	0.256915	0.132252
cg01894875	NM_001146310;NR_024445;NM_182533	C1orf86;LOC100128003;C1orf86	0.0013077	0.633455	0.765694	-0.132239
cg20684197	NM_001144935;NM_001144934;NM_033136;NM_000800;NR_026696;NR_026695	FGF1;FGF1;FGF1;FGF1;FGF1;FGF1	0.00886199	0.555765	0.423623	0.132142
cg10499172	NM_014026	DCPS	0.00110202	0.410391	0.278278	0.132113
cg07520269	NM_001364;NM_001142699;NM_001364	DLG2;DLG2;DLG2	0.00252088	0.315538	0.447579	-0.13204
cg22176709			0.00272801	0.337069	0.469033	-0.131965
cg13485718			0.000434933	0.275236	0.407191	-0.131955
cg23387863	NM_024776	SGK269	1.22229e-06	0.711974	0.843874	-0.1319
cg04100190	NM_001852	COL9A2	0.000186125	0.608843	0.476997	0.131846
cg04370174	NM_018986	SH3TC1	0.00198112	0.25995	0.391777	-0.131827
cg05962382			0.00501141	0.574143	0.705945	-0.131802
cg07076850			0.0057972	0.41521	0.546999	-0.131788
cg05194346			0.00622935	0.564908	0.696546	-0.131638
cg26585452			0.00318837	0.81802	0.686544	0.131476
cg15279364	NM_001134451;NM_152913;NM_001134450	TMEM130;TMEM130;TMEM130	0.000370631	0.429042	0.297596	0.131447
cg19193595	NM_005902	SMAD3	0.000709274	0.632032	0.763461	-0.131429
cg14403099			0.00371664	0.753721	0.885113	-0.131392
cg01370294			0.000136777	0.782322	0.650964	0.131358
cg17513592			0.000168109	0.648907	0.517558	0.131349
cg27117982	NM_145791;NM_145792;NM_145792;NM_020300	MGST1;MGST1;MGST1;MGST1	0.000186125	0.495546	0.626817	-0.131272
cg00869215	NR_002711	CLK2P	3.66865e-05	0.68081	0.812066	-0.131256
cg05415936	NM_004760	STK17A	0.000647979	0.67537	0.544171	0.131199
cg17664128	NM_032488	CNFN	0.000151703	0.372626	0.241457	0.131169
cg04737759			0.00214826	0.384277	0.515427	-0.131151
cg17065772	NM_003298	NR2C2	0.00154733	0.503956	0.635047	-0.131091
cg25628989	NM_033396	TNKS1BP1	0.000647979	0.406039	0.274952	0.131088
cg17606183	NM_019111	HLA-DRA	0.00120089	0.462986	0.331912	0.131074
cg25140783	NM_013441	RCAN3	0.00101055	0.554269	0.423239	0.13103
cg24268663	NM_000808;NR_029521	GABRA3;MIR105-1	0.000277283	0.56773	0.698726	-0.130997
cg15777261	NR_029402;NR_029403;NM_001009570;NM_006429;NM_001166284;NM_001166285	CCT7;CCT7;CCT7;CCT7;CCT7;CCT7	0.00252088	0.58431	0.453381	0.13093
cg24760467	NM_032429	LZTS2	0.00232791	0.447886	0.57873	-0.130844
cg26624021	NM_000078	CETP	0.000709274	0.64174	0.772521	-0.130781
cg17511472	NM_173660;NM_001164673	DOK7;DOK7	0.0066896	0.694867	0.825646	-0.130779
cg09292244	NM_001080826	PRAGMIN	0.00214826	0.82979	0.699109	0.130681
cg14211075	NM_001162427;NM_001162426;NM_000368	TSC1;TSC1;TSC1	1.69844e-05	0.556521	0.425882	0.130639
cg21089930	NM_015177	DTX4	0.00252088	0.430103	0.560737	-0.130634
cg04442806	NM_182935;NM_182935;NR_003090	MOBP;MOBP;MOBP	0.000136777	0.775905	0.645274	0.130632
cg07195224	NM_004833	AIM2	0.00344351	0.656126	0.525557	0.13057
cg20652899	NM_001164831;NM_022003;NM_001164832;NM_001164837;NM_001164836	FXYD6;FXYD6;FXYD6;FXYD6;FXYD6	0.000251303	0.511467	0.641846	-0.130379
cg07796014	NM_005333;NM_001122608	HCCS;HCCS	0.000205893	0.335968	0.466296	-0.130328
cg11915812	NM_002149;NM_134421	HPCAL1;HPCAL1	0.00272801	0.630648	0.500378	0.13027
cg00904966	NR_027242	LOC146336	0.000370631	0.339372	0.469529	-0.130157
cg01739960			0.000407605	0.649859	0.779969	-0.13011
cg08632810	NM_012154;NM_001164623	EIF2C2;EIF2C2	0.00400884	0.257206	0.38725	-0.130044
cg13696490	NR_026915	LOC201651	0.00465502	0.710921	0.580954	0.129967
cg21290162			0.000277283	0.634549	0.764431	-0.129882
cg20271361	NM_198384;NM_198379;NM_198380;NM_198377;NM_198385;NM_018896;NM_198396;NM_198386;NM_198376;NM_198397;NM_198388;NM_198383;NM_198382;NM_198378;NM_198387	CACNA1G;CACNA1G;CACNA1G;CACNA1G;CACNA1G;CACNA1G;CACNA1G;CACNA1G;CACNA1G;CACNA1G;CACNA1G;CACNA1G;CACNA1G;CACNA1G;CACNA1G	0.000205893	0.329682	0.199813	0.129869
cg13719901	NM_024750;NM_024512	LRRC2;LRRC2	0.000591527	0.697413	0.827216	-0.129803
cg15720535	NM_006412;NM_001012727	AGPAT2;AGPAT2	3.81861e-06	0.518697	0.388928	0.129769
cg21125207			2.18556e-06	0.625957	0.755662	-0.129705
cg18476690	NM_001161452;NM_153611;NM_001161454	CYBASC3;CYBASC3;CYBASC3	0.00120089	0.455051	0.325436	0.129616
cg00839584	NM_000575;NM_000575	IL1A;IL1A	0.00272801	0.461801	0.59141	-0.129609
cg23621013	NM_205855;NM_205855	FAM180A;FAM180A	0.0066896	0.515358	0.385786	0.129572
cg03833774	NM_152694	ZCCHC5	0.000766631	0.375189	0.504719	-0.129531
cg09846895			0.00465502	0.76231	0.632823	0.129488
cg02538169	NM_022574	GIGYF1	0.00142298	0.458486	0.5879	-0.129414
cg02176280	NM_052920	KLHL29	0.00465502	0.7163	0.845714	-0.129414
cg22335872	NM_015985;NM_015985	ANGPT4;ANGPT4	0.0066896	0.523506	0.394188	0.129318
cg14437002			7.2074e-05	0.523555	0.652835	-0.12928
cg22587600			0.00371664	0.66704	0.796279	-0.129238
cg06182923	NM_052896	CSMD2	0.00110202	0.635578	0.764797	-0.129218
cg03270204	NM_001954;NM_013993	DDR1;DDR1	0.000305694	0.707135	0.578024	0.129111
cg11826961	NM_003250;NM_199334	THRA;THRA	0.00182573	0.358639	0.487588	-0.128949
cg06381803	NM_012155	EML2	0.000168109	0.697925	0.569015	0.128911
cg14339466			0.00120089	0.767188	0.638364	0.128824
cg20898273	NM_000441;NR_028137	SLC26A4;LOC286002	0.00120089	0.795917	0.667136	0.12878
cg24362829			0.000168109	0.357172	0.485935	-0.128763
cg20995835	NM_182568	CCDC144B	0.00465502	0.522415	0.651172	-0.128757
cg15873449	NM_080423;NM_002828;NM_080422	PTPN2;PTPN2;PTPN2	8.03836e-05	0.768266	0.639538	0.128728
cg15173134	NM_003054	SLC18A2	0.000123209	0.244789	0.373516	-0.128727
cg07660635	NM_002163	IRF8	0.00120089	0.61934	0.490637	0.128702
cg00842595	NM_001013672	C17orf97	0.000647979	0.604396	0.733061	-0.128665
cg11284147			0.00318837	0.512629	0.641243	-0.128613
cg21565575	NM_175077;NM_032214;NM_032214;NM_175077	SLA2;SLA2;SLA2;SLA2	0.00717946	0.404755	0.533317	-0.128561
cg06580800			0.0082544	0.477711	0.349228	0.128483
cg08458692	NM_001004306;NM_001004306	CCDC144NL;CCDC144NL	0.000407605	0.641924	0.770352	-0.128427
cg25985504			0.00465502	0.331987	0.460404	-0.128417
cg10491452			0.00198112	0.225135	0.353551	-0.128416
cg00349404			3.66865e-05	0.485449	0.613846	-0.128397
cg09948419	NM_033054	MYO1G	0.00770052	0.53962	0.411239	0.128381
cg12068280	NM_022462;NM_152795	HIF3A;HIF3A	0.00101055	0.290556	0.418937	-0.128381
cg21540359			0.00488071	0.640696	0.769068	-0.128372
cg26555664			0.000251303	0.660298	0.788667	-0.128369
cg08422803	NM_000211;NM_001127491	ITGB2;ITGB2	0.00272801	0.520107	0.391767	0.12834
cg02343604	NM_002167	ID3	0.000775778	0.520069	0.391747	0.128323
cg27053580	NM_001002254	AWAT2	0.000151703	0.483036	0.354717	0.128319
cg14161821	NM_015061;NM_001146694;NM_001146695;NM_001146696	KDM4C;KDM4C;KDM4C;KDM4C	0.000123209	0.341548	0.469854	-0.128306
cg21049825			0.000447907	0.456503	0.328209	0.128294
cg01116491	NM_001127507;NM_017935	BANK1;BANK1	5.77757e-05	0.803408	0.675155	0.128253
cg12352225	NM_015550;NM_145322;NM_145320;NM_145321	OSBPL3;OSBPL3;OSBPL3;OSBPL3	0.00272801	0.938323	0.810118	0.128205
cg07575896	NM_033274	ADAM19	0.00371664	0.46277	0.334647	0.128123
cg07314983	NM_000560;NM_001040033	CD53;CD53	0.00214826	0.457559	0.329474	0.128086
cg24622544			0.0082544	0.377146	0.249118	0.128029
cg21444500			0.00214826	0.75484	0.626852	0.127988
cg21664636			0.0066896	0.750856	0.622872	0.127983
cg09440866			0.00232791	0.355324	0.227348	0.127976
cg16625671			0.00371664	0.478485	0.606339	-0.127855
cg19667211	NM_001080477	ODZ3	0.00318837	0.664576	0.792402	-0.127825
cg11086127	NM_080841;NM_002836;NM_080840	PTPRA;PTPRA;PTPRA	0.00252088	0.580822	0.70862	-0.127798
cg15319470	NM_178539	FAM19A2	0.00717946	0.514081	0.386287	0.127794
cg23477348	NM_198155;NM_004649	C21orf33;C21orf33	4.6132e-05	0.501467	0.373691	0.127775
cg02093833			0.00884283	0.525477	0.39776	0.127717
cg08130572	NM_002037;NM_153048	FYN;FYN	0.00168136	0.24275	0.370346	-0.127596
cg14114546	NM_005779	LHFPL2	0.0082544	0.400909	0.528499	-0.12759
cg00942920	NM_001136190;NM_017773;NM_017773	LAX1;LAX1;LAX1	0.00252088	0.489477	0.361893	0.127583
cg26230275	NM_002966	S100A10	0.00432125	0.603273	0.730832	-0.127559
cg14155058			0.0066896	0.215601	0.343104	-0.127503
cg24298280	NM_152553	RNF217	0.00465502	0.665692	0.538201	0.127491
cg09088988	NM_145001;NM_001112724	STK32A;STK32A	7.2074e-05	0.265973	0.393438	-0.127465
cg04335714			0.000205893	0.258506	0.385945	-0.127439
cg23693485	NM_018988	GFOD1	0.00318837	0.27871	0.406126	-0.127416
cg21469772	NM_199160;NM_014368	LHX6;LHX6	0.000775778	0.817224	0.944622	-0.127398
cg00555420	NM_153365	TAPT1	0.000227564	0.719175	0.846542	-0.127367
cg02959816	NM_001007525	NWD1	0.00101327	0.47823	0.35087	0.12736
cg22486834	NM_001512	GSTA4	0.00770052	0.44745	0.574794	-0.127345
cg11009100	NM_001098500	KIAA1217	0.00120089	0.580802	0.453513	0.127289
cg11418177	NM_000585;NM_172174	IL15;IL15	0.00182573	0.359455	0.232276	0.127179
cg26216433			0.000539576	0.234396	0.361538	-0.127142
cg03840849	NM_182762	MACC1	0.00344351	0.535751	0.408663	0.127088
cg21350697	NM_001143757;NM_030626;NM_001143759;NM_001143758;NR_026559	LRRC27;LRRC27;LRRC27;LRRC27;LRRC27	0.00539169	0.495874	0.622956	-0.127082
cg08506869	NM_001080394	KIAA0146	0.00120089	0.608013	0.73508	-0.127067
cg21711862			0.00465502	0.58546	0.458516	0.126944
cg23334662	NM_144629;NM_144629	RFTN2;RFTN2	0.000186125	0.407138	0.533994	-0.126857
cg04434593	NR_024469;NM_013246;NM_001166212	LOC100130987;CLCF1;CLCF1	0.000407605	0.268977	0.142158	0.126819
cg06154903	NM_006795	EHD1	5.77757e-05	0.721023	0.594223	0.1268
cg17794299			0.00120089	0.214933	0.341726	-0.126793
cg01030476	NM_201543;NM_006499;NM_201545;NM_201544	LGALS8;LGALS8;LGALS8;LGALS8	0.0029502	0.643552	0.770256	-0.126705
cg18523477	NM_017495;NM_183425	RBM38;RBM38	0.000647979	0.416599	0.289931	0.126668
cg19722698	NM_182729;NM_182743;NM_001093771;NM_003330;NM_182742	TXNRD1;TXNRD1;TXNRD1;TXNRD1;TXNRD1	0.00142298	0.614032	0.487382	0.126651
cg10318744			0.00432125	0.445742	0.319104	0.126639
cg23359665	NM_005155;NM_030651;NM_138717	PPT2;PRRT1;PPT2	0.000647979	0.627474	0.50091	0.126565
cg26334023	NM_016428;NM_031498;NM_001135186	ABI3;GNGT2;ABI3	0.000770054	0.555148	0.428656	0.126492
cg06012804			0.000863533	0.252035	0.125587	0.126448
cg14285788	NM_032740	SFT2D3	5.16524e-05	0.636948	0.510515	0.126433
cg04661436	NM_006791;NM_206839	MORF4L1;MORF4L1	0.00622935	0.619341	0.492938	0.126404
cg00765705	NM_006312;NM_001077261	NCOR2;NCOR2	0.00622935	0.265182	0.391546	-0.126365
cg04303590			0.00120089	0.688916	0.562563	0.126353
cg12289553	NM_001079516	ASAH2B	0.00539169	0.399937	0.526231	-0.126294
cg10559220	NM_001127197	ELF4	0.00232791	0.661677	0.78797	-0.126293
cg22855988	NM_031314;NM_001077442;NM_001077443;NM_004500	HNRNPC;HNRNPC;HNRNPC;HNRNPC	0.000151703	0.410039	0.283747	0.126292
cg24497361	NM_001665	RHOG	0.00252088	0.49193	0.36568	0.126251
cg20640246			0.00465502	0.284156	0.410388	-0.126232
cg06785060	NM_024503;NM_001127714	HIVEP3;HIVEP3	0.000539576	0.678551	0.804759	-0.126208
cg17648076			5.34023e-05	0.786163	0.912327	-0.126164
cg19982684			0.00168136	0.467212	0.593342	-0.12613
cg06473675	NM_212556	ASB18	0.00120089	0.486327	0.360199	0.126128
cg22044342	NM_002558	P2RX1	0.00232791	0.319886	0.445999	-0.126113
cg09781307	NR_002832	BDNFOS	0.00120089	0.387025	0.26097	0.126055
cg06557644	NM_006092	NOD1	0.00198112	0.255633	0.381615	-0.125982
cg13874425			0.00622935	0.481074	0.607005	-0.125931
cg08604416	NM_015385;NM_024991	SORBS1;SORBS1	0.00530429	0.401293	0.275391	0.125902
cg11826008	NM_152931;NM_152926;NM_152930;NM_152929;NM_152925;NM_152838;NM_152928;NM_152927;NM_006047	CPNE1;CPNE1;CPNE1;CPNE1;CPNE1;RBM12;CPNE1;CPNE1;RBM12	0.000186125	0.49502	0.369141	0.125879
cg08993878			0.00214826	0.565354	0.691214	-0.125859
cg01754525			0.00252088	0.588416	0.714131	-0.125715
cg13504059	NM_001838	CCR7	0.000205893	0.371848	0.246536	0.125313
cg23849826	NM_003246	THBS1	0.00465502	0.671716	0.797006	-0.12529
cg08598221	NM_021021	SNTB1	0.000709274	0.325325	0.450592	-0.125267
cg10912292	NM_152989	SOX5	0.00501141	0.767703	0.642455	0.125248
cg04462378	NM_006185	NUMA1	0.0057972	0.283862	0.409095	-0.125233
cg13213889	NM_002531	NTSR1	0.00501141	0.57078	0.445573	0.125207
cg27041619			0.00118021	0.441163	0.566321	-0.125158
cg04922803	NM_031302	GLT8D2	0.000925989	0.642052	0.76715	-0.125098
cg01765641	NM_014744;NM_014744;NM_001134380	TBC1D5;TBC1D5;TBC1D5	0.00101055	0.772732	0.647737	0.124995
cg06417962	NM_002939;NM_203386;NM_203387;NM_203389;NM_203383;NM_203384;NM_203385;NM_203388	RNH1;RNH1;RNH1;RNH1;RNH1;RNH1;RNH1;RNH1	0.0029502	0.651345	0.776327	-0.124982
cg04694619	NM_001001666;NM_001001891	ANO7;ANO7	0.000305694	0.604392	0.47946	0.124932
cg16047471	NM_030762	BHLHE41	0.00232791	0.393293	0.268385	0.124908
cg22737154			0.0013077	0.524067	0.64897	-0.124903
cg20005057	NM_031412	GABARAPL1	5.16524e-05	0.393087	0.268241	0.124846
cg17457912	NR_028505;NR_028503;NR_028504;NR_028502	C17orf91;C17orf91;C17orf91;C17orf91	0.00400884	0.305135	0.42993	-0.124794
cg20276630			5.16524e-05	0.338307	0.213595	0.124712
cg08474748			0.00344351	0.667662	0.792371	-0.124709
cg07870378	NM_145253	FAM100A	0.000277283	0.774585	0.649905	0.12468
cg13333954			0.00168136	0.346822	0.471443	-0.124622
cg20884605	NM_000690	ALDH2	0.000925989	0.302501	0.427077	-0.124576
cg17185921			0.00313792	0.751408	0.626847	0.124561
cg05093429	NR_028288	TCL6	0.00333261	0.522946	0.398415	0.124531
cg17416793	NM_000218;NM_181798	KCNQ1;KCNQ1	0.00168136	0.430281	0.554793	-0.124512
cg17875845	NM_001166693;NM_005935	AFF1;AFF1	0.00539169	0.599268	0.723707	-0.124439
cg15659599	NM_006866;NM_001130917	LILRA2;LILRA2	0.00252088	0.686962	0.562526	0.124436
cg04472001			0.0013077	0.333631	0.209195	0.124436
cg19089328	NM_018161	NADSYN1	0.000336738	0.668633	0.793069	-0.124436
cg03969079	NM_032199	ARID5B	0.000539576	0.564163	0.439741	0.124422
cg19569526	NM_001128209;NM_172244;NM_000337	SGCD;SGCD;SGCD	0.0066896	0.742549	0.866962	-0.124413
cg19691659	NM_015080;NM_138732	NRXN2;NRXN2	0.000775778	0.406914	0.282525	0.124388
cg10766282			0.000251303	0.797507	0.673137	0.124371
cg07825433	NM_001328;NM_001012614	CTBP1;CTBP1	0.00717946	0.757915	0.882284	-0.124368
cg23095556	NM_001136203;NM_138442	CCDC124;CCDC124	0.00154733	0.844597	0.720251	0.124346
cg05897122			0.00120089	0.548317	0.424026	0.12429
cg04367503	NM_002501	NFIX	0.000491803	0.60239	0.478126	0.124264
cg13910813	NM_030767	AKNA	0.00142298	0.648484	0.772746	-0.124262
cg06900514			0.000234428	0.665214	0.540962	0.124252
cg01492538	NM_007353	GNA12	0.00232791	0.304122	0.42834	-0.124218
cg18121713	NM_003385	VSNL1	0.00168136	0.650648	0.526549	0.124099
cg25170017	NM_006795	EHD1	0.00198112	0.696552	0.572482	0.12407
cg23361809	NM_145687;NM_004834;NM_145686	MAP4K4;MAP4K4;MAP4K4	3.66865e-05	0.813834	0.689818	0.124017
cg00539174	NM_001336	CTSZ	0.000797749	0.397825	0.273829	0.123997
cg07059469	NM_001122740;NM_001122742;NM_000125;NM_001122741	ESR1;ESR1;ESR1;ESR1	0.000370631	0.401146	0.525138	-0.123992
cg00854273			0.00232791	0.19378	0.317747	-0.123967
cg22764925	NM_013430	GGT1	0.000168109	0.499259	0.623206	-0.123947
cg06549275	NM_001135191;NM_003887	ASAP2;ASAP2	0.00770052	0.394164	0.270248	0.123916
cg05905124	NM_030782	CLPTM1L	0.00120089	0.692393	0.568478	0.123915
cg06355570	NM_153350	FBXL16	0.0066896	0.702263	0.826098	-0.123836
cg00465247			0.000591527	0.485794	0.361973	0.123821
cg02778609	NM_019116;NR_003501;NM_001083614	UBFD1;EARS2;EARS2	0.0082544	0.480171	0.356514	0.123657
cg17826679	NM_020428;NM_001145056	SLC44A2;SLC44A2	0.00501141	0.656383	0.780014	-0.123631
cg17723143	NM_000870;NM_001040172;NM_001040171;NM_001040169;NM_199453;NM_001040174;NM_001040173	HTR4;HTR4;HTR4;HTR4;HTR4;HTR4;HTR4	0.000847879	0.291163	0.414789	-0.123626
cg21929875	NM_014312;NM_014312	VSIG2;VSIG2	0.000123209	0.768125	0.891678	-0.123552
cg21122225			0.00252088	0.314714	0.191196	0.123518
cg10464773			0.00142298	0.605652	0.729118	-0.123466
cg13431037			0.000407605	0.800597	0.677281	0.123316
cg18649319			0.00622935	0.565113	0.441797	0.123316
cg03181524	NM_000540;NM_001042723	RYR1;RYR1	0.00465502	0.629883	0.506657	0.123227
cg21443659			7.2074e-05	0.364966	0.488191	-0.123226
cg10923838	NM_007174	CIT	0.000491803	0.671918	0.548722	0.123196
cg23538773			0.00432125	0.709722	0.832914	-0.123192
cg22114991			0.00198112	0.419362	0.542535	-0.123173
cg09997532	NM_005114	HS3ST1	0.000775778	0.319201	0.196032	0.12317
cg13984746	NM_173620	HEXDC	0.000447907	0.452739	0.329571	0.123168
cg07235577	NM_018967	SNTG1	0.00120089	0.397123	0.273954	0.123168
cg12942878	NR_026877;NM_020386	MGC2889;HRASLS	0.00272801	0.548199	0.425043	0.123156
cg18893596			0.000110886	0.628681	0.505576	0.123105
cg03217995	NM_152739	HOXA9	4.11601e-05	0.343593	0.466692	-0.123099
cg20693334	NM_024015	HOXB4	1.89426e-06	0.286649	0.409748	-0.123098
cg17810765	NM_001001666;NM_001001891	ANO7;ANO7	0.000227564	0.568656	0.445583	0.123073
cg04904276	NM_015914	TXNDC11	0.000205893	0.721473	0.598472	0.123001
cg25289658	NM_001167819;NR_027621;NM_001159701;NM_001159704;NM_001159703;NM_001159702;NM_001159700;NM_001449;NM_001159699	FHL1;FHL1;FHL1;FHL1;FHL1;FHL1;FHL1;FHL1;FHL1	0.00465502	0.500645	0.623604	-0.122959
cg18493761			0.00168136	0.603882	0.72674	-0.122858
cg09577804			0.00530429	0.300668	0.177829	0.122839
cg00460983			0.000539576	0.634813	0.757644	-0.122831
cg19963522	NM_001130700;NM_015553	IPCEF1;IPCEF1	0.00252088	0.356168	0.233363	0.122805
cg08814947	NM_144947;NM_001167605;NM_001136032;NM_006853	KLK11;KLK11;KLK11;KLK11	0.00400884	0.456831	0.579609	-0.122778
cg04788926			0.00232791	0.704142	0.826847	-0.122706
cg13889934	NM_001025616;NM_001042669;NM_031305	ARHGAP24;ARHGAP24;ARHGAP24	0.00240767	0.273134	0.395836	-0.122702
cg02352281			0.00214826	0.695821	0.573124	0.122697
cg02169713			0.00717946	0.49184	0.614529	-0.122689
cg00329411			0.000775778	0.62035	0.742929	-0.122579
cg08355157	NR_024394	LOC154822	0.0082544	0.507122	0.384605	0.122517
cg15166900	NM_006407	ARL6IP5	6.45615e-05	0.515912	0.39345	0.122462
cg24297418			0.000434933	0.844669	0.722256	0.122414
cg18319852	NM_005355;NM_030615	KIF25;KIF25	0.0013077	0.454049	0.576428	-0.122379
cg06025456	NM_005155;NM_030651;NM_138717	PPT2;PRRT1;PPT2	0.00432125	0.725882	0.603551	0.122331
cg01620611	NM_012121	CDC42EP4	0.00272801	0.328321	0.45065	-0.122329
cg01091514			0.000539576	0.293663	0.17136	0.122303
cg04182865	NM_183399	RNF14	7.2074e-05	0.680233	0.557994	0.12224
cg25526001	NM_207373	C10orf99	0.00400884	0.392814	0.270615	0.1222
cg02512902	NM_014238	KSR1	0.00168136	0.554016	0.431843	0.122173
cg08462194	NR_027692;NM_002636;NM_024165	PHF1;PHF1;PHF1	0.00622935	0.733847	0.611683	0.122164
cg19849557	NM_001161376;NM_145029;NM_001109938	C6orf136;C6orf136;C6orf136	0.00455336	0.405389	0.283227	0.122162
cg15395441	NM_001164468;NM_021649;NM_001164469	TMED7-TICAM2;TICAM2;TMED7-TICAM2	0.00142298	0.471323	0.349195	0.122128
cg03309938	NM_006597;NM_153201	HSPA8;HSPA8	0.000407605	0.508873	0.386768	0.122106
cg21579239	NM_173500	TTBK2	0.00429917	0.35636	0.478443	-0.122082
cg12073436			0.00946756	0.662385	0.540314	0.122071
cg19487868	NR_028379	NCRNA00182	0.0020903	0.446266	0.568289	-0.122024
cg25773695	NM_138959	VANGL1	0.0013077	0.401321	0.279348	0.121973
cg11692021	NM_002075;NM_002075	GNB3;GNB3	0.0057972	0.573968	0.452018	0.12195
cg14635199			3.81861e-06	0.666075	0.544204	0.121871
cg07658646	NM_007244;NM_001098538	PRR4;PRR4	0.00344351	0.261523	0.383336	-0.121813
cg21426003	NM_001485	GBX2	0.000251303	0.241611	0.363365	-0.121754
cg24843157	NM_005499	UBA2	0.0024845	0.408302	0.286564	0.121738
cg18304305	NM_000163	GHR	0.000394252	0.319955	0.441688	-0.121733
cg22928599	NM_020709	PNMAL2	0.000539576	0.545346	0.42362	0.121727
cg17336139	NM_206956;NM_006115;NM_206954;NM_006115;NR_027426;NM_206955;NM_206953;NM_206954;NM_206953	PRAME;PRAME;PRAME;PRAME;LOC648691;PRAME;PRAME;PRAME;PRAME	0.000336738	0.399888	0.278184	0.121704
cg11645532	NM_015711	GLTSCR1	0.00154733	0.840909	0.719304	0.121604
cg05991220	NM_001166435;NM_001166436;NM_001166434;NM_002215	ITIH1;ITIH1;ITIH1;ITIH1	9.97036e-05	0.440862	0.319293	0.121569
cg02836478	NM_002146	HOXB3	2.58154e-05	0.709017	0.830573	-0.121556
cg02308798	NM_152519	C2orf67	0.00622935	0.455397	0.576936	-0.121539
cg24924051	NM_178868	CMTM8	0.00400884	0.493167	0.614694	-0.121527
cg08394248			0.00884283	0.618335	0.496815	0.12152
cg16075641	NM_001170574;NM_001170574	FAM46D;FAM46D	0.000539576	0.472475	0.593993	-0.121517
cg16435627	NM_182946;NM_020921;NM_016350;NM_182944	NIN;NIN;NIN;NIN	0.000110886	0.754538	0.633022	0.121516
cg11169848	NR_024469;NM_013246;NM_001166212	LOC100130987;CLCF1;CLCF1	0.00344351	0.27305	0.394528	-0.121478
cg08453205	NM_175062	RASGEF1C	0.00232791	0.537103	0.658402	-0.121299
cg16703934	NM_178562	TSPAN33	0.00120089	0.642371	0.521181	0.12119
cg03936870			0.000277283	0.528588	0.649744	-0.121156
cg00490406	NM_004833	AIM2	0.000539576	0.627797	0.506653	0.121144
cg08373904	NM_053005	HCCA2	0.00101055	0.352031	0.230888	0.121142
cg08687753	NM_001143837	NOX4	0.00400884	0.396588	0.275464	0.121124
cg01008256	NM_020246;NM_003302	SLC12A9;TRIP6	0.000370631	0.379508	0.500585	-0.121077
cg04875062	NM_001135248;NM_017459;NM_001135247;NM_002403	MFAP2;MFAP2;MFAP2;MFAP2	0.00221305	0.417068	0.538134	-0.121065
cg08623942	NM_020429;NM_181349	SMURF1;SMURF1	1.5915e-05	0.638128	0.759143	-0.121016
cg16646054	NM_032947	C5orf62	0.00432125	0.232921	0.353921	-0.121
cg05942111	NM_178169	RASSF3	0.000847879	0.692921	0.571925	0.120996
cg05107535			0.00154733	0.413161	0.534148	-0.120987
cg17616283	NM_016938	EFEMP2	9.63457e-06	0.290285	0.169315	0.12097
cg20434529	NM_175911	OR2L13	0.00432125	0.167181	0.0462226	0.120958
cg07759162			0.00252088	0.255169	0.376111	-0.120942
cg08397758	NM_032709	PYROXD2	0.000647979	0.313105	0.434005	-0.1209
cg00449067	NM_005795	CALCRL	0.000407605	0.510106	0.630987	-0.120881
cg00046899			0.00465502	0.456911	0.336048	0.120863
cg16678426	NM_019105	TNXB	0.000305694	0.59444	0.473581	0.12086
cg16562776			0.00101055	0.647081	0.767907	-0.120827
cg06691250			0.00142298	0.482094	0.602916	-0.120823
cg13586038	NM_139045;NM_003070	SMARCA2;SMARCA2	0.00198112	0.640513	0.519697	0.120816
cg26501049	NM_001100411	FAM184A	0.00272801	0.528084	0.407304	0.12078
cg09645572	NM_002737	PRKCA	0.00101055	0.540093	0.419387	0.120706
cg17284609	NM_001145819;NM_033326;NM_001145811;NM_017508	SOX6;SOX6;SOX6;SOX6	0.00272801	0.617493	0.496808	0.120686
cg09520501			0.000709274	0.766601	0.645936	0.120665
cg06958535	NM_017773;NM_001136190;NM_017773	LAX1;LAX1;LAX1	0.0057972	0.647516	0.526893	0.120623
cg09646655			0.00432125	0.431525	0.552139	-0.120614
cg13948956			0.00272801	0.507978	0.387395	0.120583
cg04276626	NR_029493	MIR21	0.000775778	0.769554	0.649044	0.120509
cg10487998	NM_000478	ALPL	0.000205893	0.381615	0.50211	-0.120495
cg08306955	NR_002174;NR_027626	CMAH;CMAH	0.00371664	0.299237	0.419691	-0.120453
cg08568554	NM_001159596;NM_017693	BIVM;BIVM	1.40627e-05	0.719356	0.839808	-0.120452
cg01046070	NM_001142497;NM_152649	MLKL;MLKL	0.00432125	0.392139	0.27169	0.12045
cg27316626	NM_004770	KCNB2	0.00318837	0.312478	0.432918	-0.12044
cg26723847	NM_052875;NM_015261	VPS26B;NCAPD3	0.00214826	0.23437	0.354769	-0.120399
cg17711527	NM_017773;NM_001136190;NM_001136190;NM_017773	LAX1;LAX1;LAX1;LAX1	0.00110202	0.370951	0.250611	0.12034
cg25104727	NM_207108;NM_004319	ASTN1;ASTN1	0.00318837	0.77316	0.89343	-0.120269
cg18977541			0.00132378	0.306398	0.186137	0.120261
cg20737909	NM_053005	HCCA2	0.00465502	0.622903	0.502654	0.120249
cg20181887	NM_004642	CDK2AP1	0.000647979	0.454997	0.575214	-0.120217
cg08131547	NM_001008727	ZNF121	0.00717946	0.652177	0.531962	0.120216
cg05209306	NM_003407	ZFP36	0.00120089	0.759222	0.639014	0.120208
cg00741695	NR_027116;NR_027115	LOC285768;LOC285768	0.0082544	0.544152	0.423971	0.120181
cg08614290	NM_003382	VIPR2	0.00232791	0.288904	0.409063	-0.12016
cg14389122	NM_001142443;NM_025083;NM_001142444	EDC3;EDC3;EDC3	0.00622935	0.215586	0.3357	-0.120114
cg11991824			0.000701584	0.401354	0.521409	-0.120054
cg18887458			0.00539169	0.179348	0.299393	-0.120045
cg01173650	NM_198483	RUFY4	0.000447907	0.595966	0.475955	0.120011
cg11294364	NM_134444	NLRP4	0.00182573	0.896524	0.776513	0.120011
cg06816668			0.000591527	0.620925	0.74091	-0.119985
cg22937462	NM_019111	HLA-DRA	0.000238092	0.604125	0.484149	0.119976
cg09909478	NM_001159746	ABR	0.000539576	0.645636	0.52566	0.119976
cg16090330			0.00214826	0.617372	0.737342	-0.11997
cg22897141	NM_130801;NM_130803;NM_130800;NM_130799;NM_000244;NM_130804;NM_130802	MEN1;MEN1;MEN1;MEN1;MEN1;MEN1;MEN1	0.000701584	0.287882	0.167953	0.119929
cg24389054	NM_006896	HOXA7	1.40627e-05	0.664977	0.784902	-0.119925
cg15059804	NM_152493	ZNF362	0.00371664	0.447734	0.567583	-0.119849
cg27569829	NM_000633	BCL2	0.000491803	0.504955	0.38513	0.119825
cg10299976			0.0013077	0.770192	0.889887	-0.119695
cg16736279	NM_152744	SDK1	0.00049451	0.835468	0.715785	0.119684
cg26767974	NM_006037	HDAC4	5.77757e-05	0.195404	0.315081	-0.119677
cg01297670			0.00110202	0.384005	0.503649	-0.119644
cg22145512	NM_001162491;NM_001162490;NM_001012990	ARL13A;ARL13A;ARL13A	0.000591527	0.726475	0.846092	-0.119617
cg13302154	NM_000900	MGP	0.00142298	0.337417	0.456974	-0.119557
cg07216036			0.00884283	0.288821	0.169272	0.119549
cg16737517	NM_025224	ZBTB46	0.000491803	0.485916	0.366376	0.11954
cg18941322			0.00142298	0.193565	0.313092	-0.119527
cg19622623	NM_005447	RASSF9	0.000591527	0.633544	0.514109	0.119435
cg04892766			0.000775778	0.732456	0.613069	0.119387
cg21703255			0.000151703	0.694148	0.574793	0.119355
cg10108196			0.00318837	0.292862	0.173509	0.119353
cg22613968	NR_027042	MDS2	0.00501141	0.353084	0.233744	0.11934
cg10809134			0.00770052	0.205988	0.325326	-0.119338
cg14331899	NM_001161452;NM_153611;NM_001161454	CYBASC3;CYBASC3;CYBASC3	0.000491803	0.272509	0.153174	0.119335
cg16259229			0.00421442	0.354943	0.474142	-0.1192
cg16755833	NM_005993	TBCD	0.00252088	0.45462	0.573787	-0.119168
cg21396646	NM_173508	SLC35F3	0.00252088	0.784178	0.903339	-0.119161
cg13442016	NR_030169	MIR146B	0.00946756	0.509874	0.629015	-0.119141
cg08554554	NM_003224;NM_001134758	ARFRP1;ARFRP1	0.00717946	0.793617	0.674504	0.119113
cg03475509			0.00884283	0.445225	0.564297	-0.119072
cg25120326	NM_001004019;NM_001998	FBLN2;FBLN2	7.20756e-05	0.437991	0.31897	0.119022
cg15952370	NM_001002918	OR8D2	0.000117571	0.726754	0.607741	0.119013
cg17717866	NM_006734	HIVEP2	0.0066896	0.662547	0.543549	0.118999
cg06985993	NM_031478	FAM57B	0.00154733	0.348896	0.229983	0.118913
cg11447162			0.0082544	0.72704	0.845908	-0.118868
cg13745870	NM_181727;NM_001128615;NM_181727	SPATA12;ARHGEF3;SPATA12	0.000925989	0.653784	0.772636	-0.118851
cg14230378	NR_027766;NR_002949	NUDT16P;NUDT16P	2.29128e-05	0.31251	0.431304	-0.118794
cg04352495			4.53949e-05	0.768704	0.649922	0.118782
cg16179938	NM_006162;NM_172388;NM_172389;NM_172387	NFATC1;NFATC1;NFATC1;NFATC1	0.00377445	0.290315	0.171559	0.118756
cg14686042			0.00198112	0.922306	0.803557	0.118749
cg25103337	NM_004285	H6PD	0.00198112	0.666426	0.785122	-0.118695
cg26537280	NM_001128142;NM_015485	RWDD3;RWDD3	0.00371664	0.471492	0.590185	-0.118693
cg14832904	NM_006794;NM_001164165;NM_006794	GPR75;LOC100302652;GPR75	0.00272801	0.707197	0.825869	-0.118672
cg04272820	NM_003250;NM_199334	THRA;THRA	0.00371664	0.468397	0.587047	-0.11865
cg02460141	NR_003713	LOC728613	0.00182573	0.342395	0.223748	0.118647
cg03852551	NM_001145121	TCP10L2	0.00717946	0.365177	0.246658	0.118519
cg00018181	NM_020979	SH2B2	0.00371664	0.37173	0.253233	0.118497
cg23337647	NR_024005;NR_024004	MGC13005;MGC13005	0.00616239	0.535451	0.416955	0.118495
cg04014328	NM_024015	HOXB4	2.29128e-05	0.705277	0.823708	-0.118431
cg23570810	NM_003641	IFITM1	0.00884283	0.577729	0.696144	-0.118414
cg09944626			0.00432125	0.666294	0.547894	0.1184
cg18191547			7.2074e-05	0.902587	0.784209	0.118378
cg16378133			0.0013077	0.710868	0.592519	0.118349
cg11961237	NM_001082537;NM_024549;NM_001082538	TCTN1;TCTN1;TCTN1	0.00884283	0.521106	0.402767	0.118339
cg00055073			0.000847879	0.383645	0.501974	-0.11833
cg22158248	NM_000690	ALDH2	0.00272801	0.449373	0.331071	0.118302
cg01572652	NM_001099336;NM_198521	C12orf42;C12orf42	0.0082544	0.497319	0.615598	-0.118279
cg21920560	NM_001134395;NM_032350;NM_001134396	C7orf50;C7orf50;C7orf50	0.00172636	0.501583	0.383307	0.118276
cg00603418	NR_027020	NCRNA00164	0.00110202	0.720801	0.83906	-0.118259
cg02753027	NM_001014832;NM_001014834;NM_005884;NM_001014831;NM_001014835	PAK4;PAK4;PAK4;PAK4;PAK4	0.00168136	0.48826	0.370035	0.118225
cg22216952			0.00884283	0.707674	0.82589	-0.118216
cg08558886			0.00252088	0.725733	0.843946	-0.118212
cg00469814			0.000675633	0.354619	0.47283	-0.118211
cg20539142	NM_004198	CHRNA6	0.00488071	0.36233	0.24422	0.11811
cg24831140			0.00252088	0.722639	0.604551	0.118088
cg01902845	NM_002763	PROX1	2.29128e-05	0.658734	0.776791	-0.118057
cg02228675	NM_024119	DHX58	0.0029502	0.376909	0.259006	0.117903
cg05935184	NM_052905	FMNL2	0.000647979	0.553373	0.435519	0.117854
cg04688815	NR_029379	LOC100132163	7.2074e-05	0.712543	0.830389	-0.117846
cg03822267	NM_004556	NFKBIE	0.00182573	0.593193	0.475431	0.117762
cg10327756	NM_001130705;NM_001130703;NM_014269;NM_001130704	ADAM29;ADAM29;ADAM29;ADAM29	0.00182573	0.495767	0.378047	0.11772
cg02737554			0.00400884	0.746897	0.629183	0.117714
cg08235864	NM_033267;NM_001134222;NM_178569	IRX2;IRX2;C5orf38	0.000407605	0.0992927	0.216999	-0.117707
cg26534493			0.000539576	0.505344	0.387663	0.117682
cg07632946	NM_139199;NM_001164326;NM_006696;NM_005733	BRD8;BRD8;BRD8;KIF20A	0.00318837	0.503764	0.38611	0.117654
cg08595592			0.00501141	0.749448	0.631823	0.117625
cg19537511	NM_173728	ARHGEF15	0.000205893	0.589718	0.70729	-0.117572
cg24956176			0.00717946	0.555402	0.437842	0.117561
cg03122532	NM_002243;NM_170736;NM_170737	KCNJ15;KCNJ15;KCNJ15	0.00182573	0.581407	0.463868	0.117539
cg16804948	NM_198047;NM_014362	HIBCH;HIBCH	0.00389803	0.537512	0.419994	0.117518
cg09137533			0.00198112	0.397276	0.514721	-0.117445
cg13760683	NR_026958	LOC284749	0.000709274	0.509928	0.392557	0.117371
cg22978477	NM_032427	MAML2	0.00168136	0.618593	0.735955	-0.117362
cg21376148	NM_003802	MYH13	0.0013077	0.409146	0.291793	0.117353
cg25099065	NM_001153	ANXA4	0.00154733	0.134528	0.251865	-0.117336
cg05047521			0.000227564	0.867042	0.749822	0.117221
cg16074643	NM_152729	NT5DC1	3.26654e-05	0.553615	0.436395	0.11722
cg00995520	NM_002232	KCNA3	0.000539576	0.64893	0.766146	-0.117216
cg14997702	NM_006446	SLCO1B1	0.00252088	0.415437	0.53265	-0.117212
cg01682111	NM_023076	UNKL	0.00421442	0.550174	0.432976	0.117198
cg02389252	NM_001024372;NR_027071;NM_024812	BAALC;C8orf56;BAALC	0.00400884	0.682572	0.799763	-0.117192
cg21794419	NM_015078;NM_032047	MCF2L2;B3GNT5	0.0066896	0.623475	0.740664	-0.117189
cg26530341	NM_003844	TNFRSF10A	0.00252088	0.673384	0.55621	0.117174
cg10287970	NM_001003700;NM_001003699;NM_001168344;NM_001003698	RREB1;RREB1;RREB1;RREB1	0.0057972	0.33675	0.453919	-0.117169
cg03481855	NR_003367	PVT1	0.00182573	0.537299	0.420166	0.117133
cg03389720	NM_020686	ABAT	0.0057972	0.488362	0.371327	0.117035
cg20545458			0.000186125	0.440594	0.323597	0.116997
cg14905514			0.00622935	0.291832	0.40882	-0.116988
cg24956866	NM_004342;NM_033157;NM_033138	CALD1;CALD1;CALD1	0.00252088	0.448149	0.565105	-0.116957
cg16266492	NM_001143763;NM_130784;NM_001143764	SYCE1;SYCE1;SYCE1	0.00168136	0.679682	0.796582	-0.116899
cg00767069			0.000136777	0.444744	0.327858	0.116885
cg21151963	NM_002121	HLA-DPB1	0.00182573	0.610651	0.493794	0.116857
cg21963583	NM_181514;NM_181515	MRPL21;MRPL21	0.0066896	0.623036	0.73988	-0.116844
cg24479552	NM_005303	FFAR1	0.000925989	0.804648	0.687836	0.116812
cg19495650	NM_032776	JMJD1C	0.00539169	0.644291	0.761087	-0.116797
cg19777853	NM_145345;NM_001803	UBXN11;CD52	0.00432125	0.59588	0.479085	0.116795
cg10877315			4.43777e-06	0.587902	0.471123	0.116779
cg14219900			0.000399377	0.533981	0.417226	0.116755
cg21034183	NM_001024843	TNRC6B	9.97036e-05	0.438971	0.322308	0.116664
cg12031863	NM_013399	C16orf5	0.000336738	0.309801	0.426464	-0.116662
cg14443606			1.92853e-05	0.51494	0.398284	0.116657
cg21242918	NM_199131;NM_001112704	VAX1;VAX1	0.000168109	0.251299	0.367942	-0.116643
cg25262528	NM_002526	NT5E	0.0057972	0.251414	0.368011	-0.116597
cg00127487			0.00622935	0.338566	0.455156	-0.116591
cg11475454	NM_001135167;NM_000691;NM_001135168;NM_001135167	ALDH3A1;ALDH3A1;ALDH3A1;ALDH3A1	0.00154733	0.627749	0.744317	-0.116568
cg07543883	NM_031917;NM_031917	ANGPTL6;ANGPTL6	0.00240465	0.529793	0.413287	0.116506
cg24213248	NM_014914;NM_001037131	AGAP1;AGAP1	0.00886199	0.546635	0.430139	0.116496
cg07602659	NM_005993	TBCD	0.0013077	0.324164	0.440593	-0.116429
cg02879122	NM_014695	CCDC144A	0.00717946	0.718643	0.835051	-0.116407
cg16478536	NM_002460	IRF4	0.000847879	0.386283	0.502583	-0.116299
cg17201542	NM_006810;NR_028444	PDIA5;PDIA5	0.0029502	0.623552	0.739828	-0.116276
cg17985646	NM_001166220;NM_001077653	TBX20;TBX20	0.00946756	0.158985	0.275255	-0.11627
cg03726357			0.00214826	0.474641	0.358373	0.116268
cg14195249			0.00344351	0.701194	0.817458	-0.116264
cg22796704	NM_021226	ARHGAP22	0.00110202	0.665212	0.781437	-0.116225
cg09279949	NM_000361;NM_000361	THBD;THBD	0.000251303	0.202954	0.319122	-0.116168
cg22843803			9.63457e-06	0.349776	0.233608	0.116167
cg19641804	NM_001127322;NM_001127321;NM_001127322;NM_012117	CBX5;CBX5;CBX5;CBX5	0.00344351	0.444289	0.560454	-0.116165
cg06496546	NM_002780;NM_213633	PSG4;PSG4	8.09065e-05	0.416521	0.300412	0.116108
cg18362003	NR_024430	LOC399959	0.000539576	0.788421	0.672321	0.116101
cg13912224			0.000775778	0.557996	0.674081	-0.116085
cg19132462	NM_001025389;NM_001025390;NM_000480	AMPD3;AMPD3;AMPD3	0.00214826	0.569	0.452947	0.116053
cg08190125			0.000251303	0.687427	0.571376	0.116051
cg16299091	NM_020412;NM_001142339;NM_182978;NM_002071	CHMP1B;GNAL;GNAL;GNAL	0.00101055	0.419511	0.303467	0.116044
cg13066111			5.07198e-05	0.779268	0.663247	0.116021
cg22116041	NM_152680	TMEM154	8.03836e-05	0.2836	0.167584	0.116016
cg23261171	NM_016248	AKAP11	0.00622935	0.459743	0.343782	0.115961
cg19676182	NM_173463;NM_173463	CCDC149;CCDC149	0.00501141	0.349767	0.46571	-0.115943
cg27084712			0.00622935	0.726427	0.84233	-0.115903
cg26995224	NM_032590;NM_001005366	KDM2B;KDM2B	0.00465502	0.575629	0.45982	0.115809
cg17039645	NM_006781	C6orf10	0.000775778	0.693497	0.809288	-0.115791
cg04289069	NM_001033855;NM_001033857;NM_022487;NM_001033858	DCLRE1C;DCLRE1C;DCLRE1C;DCLRE1C	0.000925989	0.399204	0.283421	0.115783
cg17367616	NM_020183	ARNTL2	0.000277283	0.357411	0.241682	0.115729
cg16786808	NM_004438	EPHA4	0.0029502	0.519073	0.634768	-0.115695
cg00088079	NM_001128164;NM_000332	ATXN1;ATXN1	0.00465502	0.810101	0.694413	0.115688
cg02587648	NM_002744;NM_001033581	PRKCZ;PRKCZ	0.000370631	0.337932	0.222332	0.1156
cg15358372	NM_033500;NM_000188;NM_033498;NM_033497;NM_033496	HK1;HK1;HK1;HK1;HK1	2.90545e-05	0.424434	0.308835	0.115599
cg06105555	NR_015410	FLJ22536	0.00142298	0.757761	0.642176	0.115585
cg08987251	NM_002080	GOT2	0.00272801	0.375378	0.490944	-0.115566
cg10796022			0.000136777	0.83291	0.717359	0.115552
cg10639435	NM_001109689;NM_021061	ZNF250;ZNF250	0.00432125	0.490678	0.375138	0.11554
cg07005924			0.00182573	0.561657	0.446127	0.11553
cg01285926			0.00110202	0.619589	0.735095	-0.115506
cg16103159			0.0029502	0.552979	0.437532	0.115446
cg09337852	NM_033157;NM_033157;NM_033138;NM_004342;NM_004342;NM_033138	CALD1;CALD1;CALD1;CALD1;CALD1;CALD1	0.000336738	0.748522	0.863868	-0.115346
cg11020333	NM_007353	GNA12	0.0013077	0.5155	0.400156	0.115344
cg07834069	NM_174892	CD300LB	0.00318837	0.426578	0.311276	0.115301
cg11089117	NM_033632	FBXW7	0.00272801	0.739977	0.624683	0.115294
cg21238609	NM_000964	RARA	0.00101055	0.713535	0.828811	-0.115276
cg04781339			0.000770054	0.41451	0.299246	0.115264
cg15840985	NM_001137674;NM_017784	ZNF860;OSBPL10	0.000775778	0.335406	0.220158	0.115247
cg25675800	NM_198445	RINL	0.000647979	0.385957	0.270739	0.115219
cg23318538	NR_026793	C10orf50	0.00318837	0.458216	0.343005	0.115211
cg00088688			0.00198112	0.706594	0.821755	-0.115161
cg07556261	NM_080627;NM_199181	C20orf117;C20orf117	0.00110202	0.397273	0.512405	-0.115132
cg01489441	NM_001040439;NM_015133	MAPK8IP3;MAPK8IP3	0.00344351	0.303787	0.188693	0.115094
cg06797253			0.00432125	0.451538	0.336459	0.115079
cg21368063	NM_001166240;NM_001166239;NM_006569	CGREF1;CGREF1;CGREF1	0.00214826	0.515954	0.400885	0.115069
cg14909730	NM_001042425;NM_003220	TFAP2A;TFAP2A	0.00245962	0.314196	0.429263	-0.115066
cg19851222			0.000775778	0.657015	0.772074	-0.115058
cg16617366	NM_001142397;NM_014772	KIAA0427;KIAA0427	0.00182573	0.688725	0.803694	-0.114968
cg05399330	NM_057176	BSND	0.000151703	0.638524	0.523559	0.114965
cg05961700	NM_005771;NM_001142271;NM_199204;NM_001142270	DHRS9;DHRS9;DHRS9;DHRS9	0.00272801	0.488497	0.373746	0.114752
cg03672272			0.0013077	0.585541	0.700286	-0.114745
cg22571544	NM_178140	PDZD2	0.000136777	0.555826	0.441086	0.11474
cg03218396			0.00432125	0.277512	0.392246	-0.114735
cg14376467	NM_001025616;NM_001042669;NM_031305	ARHGAP24;ARHGAP24;ARHGAP24	0.00214826	0.240755	0.355463	-0.114708
cg01629240	NM_002146	HOXB3	3.32831e-06	0.30589	0.420563	-0.114673
cg17166262			0.00168136	0.374335	0.259685	0.11465
cg25574849	NM_004788	UBE4A	0.00501141	0.353035	0.238388	0.114647
cg20258249			0.00371664	0.745289	0.859909	-0.11462
cg09644952	NM_006889;NM_175862	CD86;CD86	0.00400884	0.431315	0.316732	0.114583
cg00965578	NM_145641;NM_145642;NM_145641;NM_145642	APOL3;APOL3;APOL3;APOL3	0.00232791	0.403394	0.288897	0.114496
cg21042032			0.00501141	0.688375	0.802866	-0.114491
cg21830849	NM_145648	SLC15A4	0.00198112	0.834723	0.72027	0.114453
cg16318728	NM_005401	PTPN14	0.000407605	0.543127	0.428676	0.114451
cg24593918	NM_002123	HLA-DQB1	0.00946756	0.183621	0.0691805	0.114441
cg01888869	NM_000887	ITGAX	0.00154733	0.439008	0.324579	0.114429
cg10003262			0.000251303	0.461377	0.346951	0.114426
cg14768256	NM_033210;NM_001134441;NM_001134442;NM_001134440	ZNF502;ZNF502;ZNF502;ZNF502	0.00109228	0.512789	0.627198	-0.114409
cg10904740			0.000925989	0.613597	0.727996	-0.114399
cg08228249	NM_013313	YPEL1	0.0082544	0.631981	0.517618	0.114362
cg18113826	NM_004847;NM_032955;NM_001623	AIF1;AIF1;AIF1	0.00179217	0.245235	0.359585	-0.11435
cg04980849	NR_033252;NM_001482	LOC145663;GATM	0.00182573	0.80412	0.689805	0.114315
cg06604249	NM_020686;NM_001127448;NM_000663;NM_001127448	ABAT;ABAT;ABAT;ABAT	0.00272801	0.682712	0.568428	0.114284
cg03546163	NM_004117;NM_001145775;NM_001145777;NM_001145776	FKBP5;FKBP5;FKBP5;FKBP5	0.00946756	0.529258	0.643519	-0.114261
cg01559770	NM_172057;NM_000238	KCNH2;KCNH2	0.00371664	0.38171	0.267481	0.114229
cg14089503	NM_025151;NM_001002814	RAB11FIP1;RAB11FIP1	0.0072662	0.558304	0.444083	0.114221
cg04195774	NM_001077654	TNFAIP8	0.000305694	0.487033	0.372851	0.114182
cg25273707			0.0029502	0.472259	0.358112	0.114147
cg19928377	NM_031849;NM_018905;NM_031411;NM_031857;NM_018910;NM_018900;NM_018909;NM_018908;NM_018902;NM_031861;NM_018901;NM_018906;NM_018907;NM_031860;NM_018911	PCDHA6;PCDHA2;PCDHA1;PCDHA9;PCDHA7;PCDHA1;PCDHA6;PCDHA5;PCDHA11;PCDHA11;PCDHA10;PCDHA3;PCDHA4;PCDHA10;PCDHA8	0.00622935	0.575918	0.69004	-0.114122
cg04142296	NM_021623	PLEKHA2	0.0066896	0.314482	0.200361	0.114121
cg16672562	NM_022462;NM_152795;NM_022462	HIF3A;HIF3A;HIF3A	0.000227564	0.724576	0.838683	-0.114107
cg02402368	NM_001118888;NM_001147;NM_001118887;NM_001118888;NM_001147;NM_001118887;NM_024596	ANGPT2;ANGPT2;ANGPT2;ANGPT2;ANGPT2;ANGPT2;MCPH1	0.000136777	0.601459	0.715516	-0.114057
cg17652174	NM_001009905	B3GNTL1	0.00884283	0.399673	0.285658	0.114016
cg13378649			0.00501141	0.412322	0.526314	-0.113992
cg01881287			0.000168109	0.829965	0.943952	-0.113987
cg02474116	NM_017607	PPP1R12C	0.000136777	0.80881	0.694863	0.113947
cg00970057	NM_024503;NM_001127714	HIVEP3;HIVEP3	0.00501141	0.388355	0.274411	0.113945
cg15490784	NM_014079	KLF15	0.00622935	0.32736	0.213416	0.113943
cg10690467	NM_152439;NM_032735	BEST3;BEST3	0.00432125	0.815986	0.702075	0.113911
cg18973628			0.0057972	0.709399	0.823288	-0.113889
cg06430772	NM_014914;NM_001037131	AGAP1;AGAP1	0.00344351	0.706453	0.592677	0.113776
cg15058645	NM_001077269	WIPF1	0.00232791	0.403358	0.517132	-0.113774
cg02824980	NM_023944	CYP4F12	0.000709274	0.482922	0.369155	0.113767
cg00864012	NM_018469	TEX2	0.00344351	0.491198	0.377434	0.113764
cg04988219			0.00432125	0.525296	0.639055	-0.113759
cg17158584	NM_001328;NM_001012614	CTBP1;CTBP1	0.00708674	0.47152	0.357796	0.113724
cg13424029			2.58154e-05	0.492381	0.606103	-0.113723
cg12184221	NM_018266	TMEM39A	0.00142298	0.484296	0.370629	0.113667
cg24038764	NR_027131	CXorf42	2.90545e-05	0.316669	0.203008	0.113661
cg27584546	NM_001170766;NM_001170765;NM_032440	LCOR;LCOR;LCOR	0.00400884	0.508924	0.395265	0.113658
cg27064708	NM_133509	RAD51L1	0.00198112	0.452117	0.56577	-0.113653
cg26982447	NM_001004441	ANKRD34B	0.00261093	0.784779	0.671133	0.113646
cg26958838			0.000847879	0.654167	0.767797	-0.113629
cg24401487	NM_004481	GALNT2	0.000336738	0.354078	0.467687	-0.113609
cg23985374	NM_031849;NM_018905;NM_031411;NM_031857;NM_018910;NM_018900;NM_018909;NM_018908;NM_018901;NM_018906;NM_018907;NM_031860;NM_018911	PCDHA6;PCDHA2;PCDHA1;PCDHA9;PCDHA7;PCDHA1;PCDHA6;PCDHA5;PCDHA10;PCDHA3;PCDHA4;PCDHA10;PCDHA8	0.00101055	0.681846	0.795405	-0.113559
cg12362478			0.00101055	0.330914	0.217406	0.113508
cg01938023	NM_198282	TMEM173	0.00252088	0.594516	0.707925	-0.11341
cg07048516	NM_182520	C22orf15	0.00198112	0.353711	0.467102	-0.113392
cg01285652	NM_002972	SBF1	0.000647979	0.778357	0.665007	0.113351
cg15218509	NM_021034;NM_021034	IFITM3;IFITM3	5.69161e-05	0.187179	0.300519	-0.11334
cg04815334	NM_018161	NADSYN1	0.0013077	0.664014	0.777343	-0.113329
cg00907200	NM_194312	ESPNL	0.00232791	0.770133	0.88345	-0.113317
cg08747963	NR_026867	LOC134466	0.00501141	0.643053	0.756343	-0.11329
cg11888982			0.00318837	0.684969	0.571708	0.113261
cg14959707	NM_014153;NM_014153	ZC3H7A;ZC3H7A	0.00252088	0.567459	0.454228	0.113231
cg25531857	NR_003605;NR_003606;NR_003604	C20orf199;C20orf199;C20orf199	0.00232791	0.577534	0.464359	0.113175
cg11328127	NM_001135053;NM_021805;NM_001135054	SIGIRR;SIGIRR;SIGIRR	0.0029502	0.319505	0.432678	-0.113174
cg12229979	NM_004145;NM_001130065	MYO9B;MYO9B	0.00182573	0.835599	0.722442	0.113156
cg18159646	NR_000008;NR_002560;NR_002561;NR_003098	SNORD22;SNORD31;SNORD30;SNHG1	0.000168109	0.540253	0.427133	0.11312
cg24375627	NM_014624	S100A6	0.000277283	0.536308	0.649396	-0.113088
cg05027594	NM_153365	TAPT1	0.000123209	0.694524	0.807592	-0.113068
cg07240413			0.00107314	0.840023	0.726989	0.113033
cg20359349	NR_026770	C17orf88	0.00400884	0.425466	0.312435	0.113031
cg10074506	NM_183239	GSTO2	0.00884283	0.682818	0.795842	-0.113023
cg15637765	NM_007118	TRIO	0.000251303	0.259127	0.146139	0.112988
cg26075966			0.000151703	0.559203	0.446221	0.112982
cg18254983	NM_017509;NM_138563;NM_138564	KLK15;KLK15;KLK15	0.0029502	0.800464	0.913424	-0.11296
cg16190265	NM_001164759;NM_001164762;NM_001164758;NM_001164760;NM_001164761;NM_002735	PRKAR1B;PRKAR1B;PRKAR1B;PRKAR1B;PRKAR1B;PRKAR1B	6.45615e-05	0.466646	0.353747	0.112899
cg01890417	NM_032186;NM_201269;NM_016620	ZNF644;ZNF644;ZNF644	0.0029502	0.636274	0.523386	0.112887
cg07830156			0.00252088	0.773235	0.660393	0.112842
cg11274172	NM_003369	UVRAG	0.000847879	0.245097	0.357933	-0.112836
cg09353052	NM_001165964;NM_006920;NM_001165963	SCN1A;SCN1A;SCN1A	0.00198112	0.689805	0.576971	0.112833
cg13951797	NM_032271	TRAF7	0.000647979	0.419356	0.306545	0.112811
cg10959651	NM_080657	RSAD2	3.66865e-05	0.320898	0.433657	-0.112759
cg16462291			0.000539576	0.369146	0.256389	0.112757
cg27169073			0.00198112	0.463346	0.350603	0.112744
cg01636650	NM_015873	VILL	5.16524e-05	0.261805	0.149074	0.112731
cg16098726	NM_000174	GP9	0.00946756	0.310474	0.423199	-0.112725
cg26521448	NM_014153	ZC3H7A	0.00400884	0.655651	0.542927	0.112724
cg24711774			0.00884283	0.715965	0.828688	-0.112723
cg18406700	NM_153711;NM_001139444	FAM26E;BET3L	0.000205893	0.699679	0.58697	0.112709
cg13995230	NR_030390;NR_030157;NR_029868;NR_030266;NR_029861	MIR654;MIR376B;MIR376A1;MIR376A2;MIR376C	0.000775778	0.569724	0.457041	0.112684
cg01147727	NM_015005;NM_001112726	KIAA0284;KIAA0284	0.000591527	0.83018	0.717508	0.112673
cg00169122	NM_013275	ANKRD11	0.00154733	0.454921	0.34225	0.112671
cg03717994			0.00168136	0.685984	0.573347	0.112637
cg05516505			0.00400884	0.377547	0.264921	0.112626
cg11907323			0.00622935	0.805554	0.692958	0.112596
cg25631489	NM_024947	PHC3	0.000227564	0.379049	0.266558	0.112492
cg05891849	NM_001010855	PIK3R6	0.000136777	0.363946	0.251455	0.11249
cg26121053			0.00272801	0.343219	0.230754	0.112465
cg25382573	NM_001037671;NM_001037671	C12orf74;C12orf74	0.00432125	0.713277	0.600821	0.112456
cg10872209	NM_178858;NM_004311	SFXN2;ARL3	0.000591527	0.371922	0.259479	0.112443
cg13292703	NM_002531	NTSR1	0.00344351	0.515454	0.403015	0.11244
cg01374885	NR_030235	MIR508	0.000136777	0.478501	0.366076	0.112425
cg17312546			0.000407605	0.648354	0.536025	0.112329
cg20190772	NM_001080394	KIAA0146	0.000647979	0.520717	0.633029	-0.112313
cg19978416			0.00272801	0.464253	0.352009	0.112244
cg10800620			0.00465502	0.548235	0.435996	0.112239
cg17372758	NM_015947;NM_173473	ASCC1;C10orf104	0.000277283	0.773672	0.661473	0.112199
cg06085579	NM_001130081;NM_002662	PLD1;PLD1	0.0029502	0.349905	0.23771	0.112195
cg05011526	NM_015055	SWAP70	8.47324e-06	0.824473	0.712306	0.112167
cg18623836	NM_001034;NM_001165931	RRM2;RRM2	0.00491617	0.744594	0.632429	0.112165
cg22900266			0.0013077	0.402607	0.290494	0.112113
cg09465703	NM_001005920	JMJD8	0.0029502	0.373598	0.261503	0.112095
cg22301418	NM_015205;NM_032189	ATP11A;ATP11A	0.00987362	0.466318	0.35424	0.112078
cg04399899	NM_014247;NM_014247	RAPGEF2;RAPGEF2	0.000591527	0.701766	0.58971	0.112055
cg13842556	NM_017551	GRID1	0.00884283	0.674029	0.786055	-0.112025
cg01277542	NM_001043	SLC6A2	4.6132e-05	0.121169	0.233175	-0.112006
cg07504763			0.000591527	0.494962	0.606955	-0.111993
cg21655448	NR_003948	HCG22	0.00717946	0.440043	0.328065	0.111977
cg17332198	NM_006576	AVIL	0.00232791	0.644147	0.75611	-0.111963
cg03737080	NM_201398;NM_025207	FLAD1;FLAD1	3.26654e-05	0.311842	0.199935	0.111907
cg12955789	NM_175062	RASGEF1C	0.000447907	0.660427	0.772326	-0.111899
cg11668917	NR_028374;NM_002539	SNORA80B;ODC1	0.000591527	0.425529	0.313636	0.111894
cg07375836	NM_198839;NM_198834	ACACA;ACACA	0.000709274	0.65804	0.769924	-0.111884
cg23664396			0.0057972	0.718334	0.830155	-0.111821
cg07205823			0.00240465	0.564628	0.45282	0.111808
cg10775000			0.00198112	0.727576	0.615783	0.111792
cg07939445	NM_003309;NM_001080976	TSPYL1;DSE	5.16524e-05	0.665409	0.777184	-0.111775
cg15651928	NM_183397;NM_007238	PXMP4;PXMP4	0.00252088	0.600863	0.712614	-0.111752
cg01091565	NM_018670	MESP1	0.00371664	0.845147	0.733441	0.111706
cg13758331	NM_006538;NM_138621	BCL2L11;BCL2L11	9.97036e-05	0.373377	0.485044	-0.111667
cg07219303	NM_001102470;NM_000672	ADH6;ADH6	0.00318837	0.618724	0.507078	0.111647
cg05930586			0.000925989	0.644239	0.532625	0.111614
cg11105610	NM_005567	LGALS3BP	0.000407605	0.684836	0.796447	-0.111611
cg01593673	NM_002146	HOXB3	0.000539576	0.315257	0.426866	-0.111609
cg00186909	NM_001004330	PLEKHG7	0.000186125	0.612671	0.724256	-0.111585
cg04741094			0.000491803	0.816093	0.704532	0.111561
cg07127410	NM_032173	ZNRF3	0.000925989	0.754569	0.866066	-0.111496
cg04995717	NM_000459;NM_000459	TEK;TEK	0.0082544	0.402953	0.514449	-0.111496
cg16340767			0.00344351	0.452602	0.564094	-0.111492
cg08966619			0.0057972	0.477666	0.589141	-0.111475
cg20558112	NM_001010875	SLC25A30	0.00400884	0.505586	0.617057	-0.11147
cg26123647	NM_015025	MYT1L	0.00168136	0.40462	0.29317	0.11145
cg23016776	NM_005479;NM_005479	FRAT1;FRAT1	0.00232791	0.451908	0.563352	-0.111444
cg03015498			0.000775778	0.504243	0.615674	-0.111431
cg22714811			0.00182573	0.743321	0.854748	-0.111427
cg11586034	NM_007259	VPS45	0.00371664	0.326526	0.437946	-0.111421
cg16189091			0.00142298	0.624014	0.735409	-0.111395
cg22627753	NM_198576	AGRN	0.000186125	0.859084	0.747718	0.111366
cg12065616			0.0013077	0.489026	0.377675	0.111351
cg08815110	NM_014960	ARSG	0.00198112	0.644578	0.533232	0.111346
cg04555665	NM_030815	PDRG1	0.00252088	0.686005	0.574671	0.111335
cg26244575			0.00539169	0.47774	0.366409	0.111332
cg19577080	NM_001101669;NM_003866	INPP4B;INPP4B	0.00252088	0.512887	0.401562	0.111326
cg18637380	NM_005956	MTHFD1	0.00465502	0.807947	0.696624	0.111324
cg03417975			0.00539169	0.803318	0.691995	0.111324
cg14834925			0.00539169	0.366242	0.477564	-0.111323
cg26588061	NM_015542;NM_080599	UPF2;UPF2	0.00182573	0.551578	0.440261	0.111316
cg15097489			0.00101055	0.496098	0.384816	0.111282
cg07239897			0.00252088	0.754338	0.865605	-0.111266
cg13878360			0.00539169	0.26944	0.380665	-0.111225
cg21723559	NM_015937	PIGT	0.00182573	0.492883	0.381692	0.111191
cg24861859	NM_003285	TNR	0.00182573	0.700142	0.811283	-0.111141
cg08267399	NR_024441	LOC731779	0.00272801	0.445989	0.334873	0.111116
cg07285983	NM_014857;NM_001035230	RABGAP1L;RABGAP1L	0.00101055	0.58967	0.70074	-0.111071
cg26888012	NM_014068	PSORS1C1	0.00400884	0.565078	0.454067	0.11101
cg19421346	NM_001003656;NR_033191;NM_018461	PPP2R2D;PPP2R2D;PPP2R2D	0.00168136	0.667056	0.778062	-0.111006
cg08748033	NM_001166373	MARCH1	0.00142298	0.597189	0.48621	0.110979
cg17320378	NM_173544	FAM129C	0.000925989	0.671053	0.78197	-0.110917
cg19139729	NM_003167;NM_003167	SULT2A1;SULT2A1	0.00501141	0.67895	0.789788	-0.110839
cg04972979	NM_033409;NM_033409	C20orf54;C20orf54	0.00168136	0.438982	0.54982	-0.110838
cg18990407	NM_004443	EPHB3	0.00188536	0.792484	0.681679	0.110805
cg24037651	NM_145003	TSNARE1	0.00539169	0.664555	0.553861	0.110695
cg05316065	NM_031415;NM_031415	GSDMC;GSDMC	0.00344351	0.554453	0.443761	0.110692
cg00379720			0.000925989	0.355942	0.466618	-0.110676
cg25031824	NM_002558	P2RX1	0.00539169	0.393162	0.503837	-0.110675
cg25885716	NM_000868	HTR2C	0.00318837	0.646496	0.75717	-0.110675
cg01215061	NM_138960;NM_138960	TGIF2LX;TGIF2LX	0.000707747	0.701803	0.812465	-0.110662
cg23753006			0.00272801	0.663526	0.552893	0.110633
cg22745747	NM_203281	BMX	0.00142298	0.668808	0.779435	-0.110627
cg11177526	NM_198930;NM_198929;NM_152501;NM_198928	PYHIN1;PYHIN1;PYHIN1;PYHIN1	0.000479394	0.562076	0.451513	0.110564
cg04596842			0.00142298	0.642573	0.753122	-0.110549
cg08885224	NM_172105;NM_172103;NM_004100	EYA4;EYA4;EYA4	0.00432125	0.53346	0.644007	-0.110548
cg18077971	NM_013942;NM_000438;NM_181460;NM_181457;NM_181458;NM_153038;NM_181461;NM_001127366;NM_181459	PAX3;PAX3;PAX3;PAX3;PAX3;CCDC140;PAX3;PAX3;PAX3	0.00770052	0.206708	0.317255	-0.110547
cg03340754	NM_018938	PCDHB4	0.00432125	0.474179	0.584721	-0.110542
cg25491558			0.00232791	0.188999	0.299535	-0.110536
cg12156154	NM_000044	AR	0.00539169	0.753003	0.863524	-0.110521
cg00374016			0.00344351	0.377396	0.487907	-0.110511
cg10216414	NM_017546	C2orf29	0.0082544	0.4497	0.339189	0.11051
cg24774357			0.000110886	0.286703	0.397155	-0.110452
cg25038311			0.00110202	0.717945	0.607504	0.110441
cg08252303	NM_001161352;NM_002247;NM_001161353;NM_001014797	KCNMA1;KCNMA1;KCNMA1;KCNMA1	0.000925989	0.77398	0.663559	0.110421
cg09735627			0.00110202	0.70025	0.810664	-0.110414
cg03344031	NM_001077186;NM_001145809;NM_024729	MYH14;MYH14;MYH14	0.00214826	0.48082	0.591228	-0.110408
cg10287321			0.000491803	0.662876	0.552488	0.110388
cg21284779	NM_181885	RXFP4	0.00120089	0.335933	0.446269	-0.110335
cg00376544	NM_153230	FBXO39	0.000775778	0.235547	0.345856	-0.110309
cg19860691	NM_001042537;NM_006359	SLC9A6;SLC9A6	0.00101055	0.58971	0.699997	-0.110287
cg07680505			0.000205893	0.644452	0.534175	0.110278
cg08879544			0.00717946	0.632172	0.742437	-0.110265
cg01194336	NM_001142523;NM_007199	IRAK3;IRAK3	0.00168136	0.684133	0.573911	0.110222
cg20824200			1.24118e-05	0.480832	0.370611	0.110221
cg13603599	NM_003977	AIP	0.0066896	0.864112	0.753892	0.110219
cg18900669	NM_001040059;NM_001251	CD68;CD68	0.00198112	0.454224	0.344006	0.110218
cg16257607	NM_000984;NR_000014;NR_000009	RPL23A;SNORD42A;SNORD4B	3.26654e-05	0.760869	0.650654	0.110215
cg07482257			8.95659e-05	0.659931	0.770132	-0.110202
cg00150874	NM_001123384;NM_001123383	BCOR;BCOR	0.000110886	0.550015	0.66017	-0.110155
cg08870893	NM_001025357	C8orf85	0.0013077	0.566788	0.456635	0.110154
cg26332926	NM_001098512;NM_006258	PRKG1;PRKG1	0.00884283	0.151556	0.261697	-0.110141
cg18406852	NM_004854	CHST10	0.00360288	0.409926	0.299804	0.110122
cg13305951	NM_007148;NM_007148	RNF112;RNF112	0.000227564	0.563675	0.673788	-0.110113
cg24624505			0.00455336	0.696395	0.806503	-0.110108
cg22835851	NM_020945	WDFY4	0.000305694	0.416744	0.30664	0.110104
cg19215110	NM_001954;NM_013993	DDR1;DDR1	0.000638675	0.587263	0.477171	0.110092
cg20862097	NM_015345	DAAM2	0.00465502	0.515994	0.626063	-0.110069
cg06453916	NM_014298	QPRT	0.00371664	0.24801	0.358078	-0.110068
cg16710042	NM_173512	SLC38A11	0.000847879	0.356557	0.466614	-0.110056
cg08469255	NM_001954;NM_013993	DDR1;DDR1	8.03836e-05	0.39036	0.280316	0.110044
cg21543918	NM_020464;NM_020464	NHSL1;NHSL1	0.000539576	0.704087	0.814125	-0.110038
cg19735804			0.00142298	0.240496	0.350522	-0.110026
cg16112945	NR_024514;NM_139025;NM_139027;NM_139026	ADAMTS13;ADAMTS13;ADAMTS13;ADAMTS13	0.00198112	0.330776	0.220817	0.109959
cg25574603	NM_001080554;NM_001080555	GSG1;GSG1	0.000370631	0.356382	0.246482	0.1099
cg24251850	NM_001142633;NM_014308	PIK3R5;PIK3R5	0.0029502	0.343992	0.234092	0.1099
cg03281139	NM_005597;NM_205843	NFIC;NFIC	0.000775778	0.646157	0.536302	0.109855
cg05684200			9.63457e-06	0.831155	0.940997	-0.109842
cg06048354	NM_018938	PCDHB4	8.03836e-05	0.411422	0.521263	-0.10984
cg27576271	NM_001037671	C12orf74	0.00432125	0.65349	0.543672	0.109818
cg24301247	NM_145648	SLC15A4	5.00641e-06	0.617791	0.507987	0.109805
cg15362155	NM_206998;NM_206998	SCGB1D4;SCGB1D4	0.0082544	0.536539	0.42675	0.109789
cg14138235			0.00318837	0.46309	0.572853	-0.109762
cg05403316			0.00622935	0.266274	0.376011	-0.109738
cg25371036	NM_130847	AMOTL1	0.000925989	0.587804	0.697526	-0.109722
cg15531512			0.00400884	0.666383	0.776086	-0.109703
cg07890238	NM_001080826	PRAGMIN	0.00717946	0.827019	0.717331	0.109688
cg07772904			0.0032147	0.627268	0.517587	0.109681
cg12743248	NM_024593;NM_001142857;NR_024605	EFCAB1;EFCAB1;EFCAB1	0.00142298	0.596972	0.48732	0.109652
cg10981439	NM_018643;NM_018643	TREM1;TREM1	0.000227564	0.735951	0.845588	-0.109637
cg05496814			0.000227564	0.505075	0.395453	0.109622
cg05626226	NM_017700	FLJ20184	0.00272801	0.476787	0.367179	0.109608
cg16611352	NM_002558	P2RX1	0.00884283	0.235854	0.345411	-0.109557
cg11884704	NM_001006641;NM_001006642	SLC25A25;SLC25A25	0.000447907	0.740016	0.849557	-0.109541
cg22078805	NM_198475	FAM171A2	0.00400884	0.484006	0.374465	0.10954
cg24032691	NM_144575	CAPN13	0.00465502	0.465393	0.355875	0.109518
cg06173889	NM_003108;NM_003108	SOX11;SOX11	0.000205893	0.424772	0.534241	-0.109469
cg17251713	NM_003784;NM_001040147	SERPINB7;SERPINB7	0.00465502	0.480811	0.371346	0.109465
cg15418419	NM_006120	HLA-DMA	0.0029502	0.83119	0.721728	0.109462
cg20927567	NM_000984;NR_000014;NR_000009;NR_000010	RPL23A;SNORD42A;SNORD4B;SNORD4A	0.00272801	0.598911	0.489504	0.109407
cg13100137			0.000847879	0.414902	0.524278	-0.109376
cg11145826	NM_198527;NM_001039675;NM_018671	HDDC3;UNC45A;UNC45A	0.00770052	0.50644	0.397065	0.109374
cg16253634	NM_004342;NM_033157;NM_033138	CALD1;CALD1;CALD1	0.00154733	0.516497	0.625863	-0.109366
cg27162435	NM_004732	KCNAB3	0.00951137	0.821583	0.712218	0.109365
cg25940517	NM_138451	IQCD	0.00622935	0.174619	0.283962	-0.109343
cg18898632			0.00770052	0.778765	0.888107	-0.109342
cg21418052	NM_194318	B3GALTL	0.000591527	0.423119	0.313781	0.109337
cg15704219	NM_017782	C10orf18	0.000709274	0.326524	0.217217	0.109307
cg11356004	NM_001447	FAT2	0.00360288	0.547225	0.43792	0.109304
cg20559537	NM_015111	N4BP3	0.00432125	0.4125	0.303211	0.10929
cg22858525			0.00174246	0.523513	0.414238	0.109275
cg26048333	NM_007118	TRIO	0.000227564	0.610323	0.501063	0.10926
cg24215812			0.00946756	0.4923	0.383047	0.109253
cg23786205			0.00501142	0.628611	0.519365	0.109246
cg15444358			0.00154733	0.414399	0.305201	0.109198
cg14018172	NM_004726;NM_001080975	REPS2;REPS2	0.000847879	0.65608	0.765241	-0.109162
cg09355528	NM_080798;NM_080809;NM_080800;NM_080811;NM_080810;NM_080799;NM_080813;NM_005203;NM_080815;NM_080807;NM_080801;NM_080808;NM_080814;NM_080802;NM_080812;NM_080805;NM_080806;NM_080804;NM_080803;NM_001130103	COL13A1;COL13A1;COL13A1;COL13A1;COL13A1;COL13A1;COL13A1;COL13A1;COL13A1;COL13A1;COL13A1;COL13A1;COL13A1;COL13A1;COL13A1;COL13A1;COL13A1;COL13A1;COL13A1;COL13A1	0.000447907	0.660742	0.551637	0.109105
cg06442199	NM_207189	BRDT	0.000168109	0.620422	0.729525	-0.109104
cg03613942			0.00214826	0.553878	0.444787	0.109091
cg08141873	NM_005343;NM_176795;NM_001130442	HRAS;HRAS;HRAS	0.000186125	0.476585	0.3675	0.109086
cg06553792			0.0029502	0.609237	0.500157	0.10908
cg13787850			0.00214826	0.437438	0.328371	0.109067
cg08498747			0.000925989	0.520353	0.629401	-0.109048
cg06194960	NM_022450	RHBDF1	0.00168136	0.84381	0.734763	0.109047
cg03875678	NM_004131	GZMB	0.00432125	0.49173	0.382686	0.109043
cg03109701	NM_001109903;NM_032814;NM_024738	RNFT2;RNFT2;C12orf49	3.66865e-05	0.734716	0.625733	0.108983
cg08494738			0.00232791	0.535693	0.426771	0.108922
cg27157038	NM_004088;NM_001017520	DNTT;DNTT	0.00182573	0.503198	0.612108	-0.10891
cg15997518			0.00110202	0.723114	0.614208	0.108907
cg01231464	NM_012368	OR2C1	0.000491803	0.527493	0.418615	0.108878
cg13615971			0.00110202	0.323249	0.432118	-0.108869
cg24604013	NM_005986	SOX1	0.00120089	0.260534	0.369394	-0.10886
cg04475307	NM_001077525;NM_022485;NM_001077526	MTMR14;MTMR14;MTMR14	0.00252088	0.701406	0.592601	0.108805
cg27365701	NM_001946;NM_022652	DUSP6;DUSP6	0.00432125	0.294563	0.40333	-0.108767
cg08893575	NM_005884;NM_001014832;NM_001014835;NM_001014831;NM_001014834	PAK4;PAK4;PAK4;PAK4;PAK4	0.000151703	0.536251	0.427503	0.108748
cg08630923			0.000110886	0.337679	0.446422	-0.108744
cg00552235			0.000180543	0.292512	0.401246	-0.108735
cg27236007	NM_001139488;NM_015376;NM_170672	RASGRP3;RASGRP3;RASGRP3	0.00627526	0.404962	0.296228	0.108735
cg27639575	NM_005187	CBFA2T3	0.000775778	0.21417	0.105438	0.108732
cg01193368			0.00198112	0.713744	0.822474	-0.10873
cg12800105	NM_032590;NM_001005366	KDM2B;KDM2B	0.000925989	0.799744	0.691018	0.108726
cg23526087	NM_133509	RAD51L1	0.00501141	0.316802	0.208076	0.108726
cg21150053	NM_016279	CDH9	0.000251303	0.208816	0.317512	-0.108695
cg03167633			0.00622935	0.364455	0.473138	-0.108683
cg12807628	NM_001033017	DEFB135	0.000491803	0.394396	0.285731	0.108665
cg08551036	NM_174917;NR_023316;NM_001127214	ACSF3;ACSF3;ACSF3	0.000539576	0.755705	0.647123	0.108582
cg25031476	NM_130846;NM_002849	PTPRR;PTPRR	0.00371664	0.652781	0.76134	-0.108559
cg03792964			6.45615e-05	0.780128	0.671588	0.10854
cg20367266	NM_152278	TCEAL7	0.0029502	0.580979	0.689516	-0.108538
cg13330559	NM_207386	SHISA6	0.000925422	0.350201	0.458734	-0.108533
cg14836555			0.00432125	0.608675	0.500148	0.108527
cg06808011	NM_001145446;NM_198087;NM_003454;NM_001145447;NM_001145448;NM_198088	ZNF200;ZNF200;ZNF200;ZNF200;ZNF200;ZNF200	0.00770052	0.601362	0.709837	-0.108475
cg26899988			0.0029502	0.621443	0.51298	0.108463
cg27168131	NM_001001582;NM_001001568;NM_001001573;NM_001001567;NM_001001578;NM_002606;NM_001001580;NM_001001579;NM_001001581;NM_001001571;NM_001001584;NM_001001576;NM_001001585;NM_001001574;NM_001001572;NM_001001569;NM_001001570;NM_001001577;NM_001001583;NM_001001575	PDE9A;PDE9A;PDE9A;PDE9A;PDE9A;PDE9A;PDE9A;PDE9A;PDE9A;PDE9A;PDE9A;PDE9A;PDE9A;PDE9A;PDE9A;PDE9A;PDE9A;PDE9A;PDE9A;PDE9A	0.00272801	0.734627	0.843075	-0.108448
cg03389926			0.00154733	0.522381	0.413955	0.108427
cg24800754	NM_005934	MLLT1	0.000539576	0.272617	0.381032	-0.108415
cg11283404	NM_001556	IKBKB	0.00182573	0.618236	0.509859	0.108377
cg25423573	NM_153367	ZCCHC24	0.0029502	0.58527	0.693618	-0.108348
cg20112376	NM_001099433;NM_144720	JAKMIP1;JAKMIP1	0.000491803	0.492004	0.600341	-0.108337
cg23228178	NM_012387	PADI4	0.00182573	0.547714	0.439399	0.108314
cg16646298	NM_005803	FLOT1	0.00168136	0.596048	0.487756	0.108292
cg14528056	NR_002188	GBAP1	0.00501141	0.487675	0.379397	0.108277
cg26510178			0.00120089	0.801469	0.693205	0.108264
cg08773314	NM_001040445	ASB1	0.00182573	0.343988	0.235738	0.108251
cg16476940	NM_020979	SH2B2	0.00110202	0.708909	0.600692	0.108217
cg19930004			0.00278313	0.242897	0.351112	-0.108214
cg17951713			5.16524e-05	0.392946	0.501131	-0.108185
cg24809269	NM_182565	FAM100B	0.00432125	0.671882	0.563723	0.108159
cg17113158	NM_183404;NM_002895	RBL1;RBL1	0.000775778	0.717136	0.608995	0.108141
cg05788080	NM_033397	ITPRIP	0.00154733	0.647868	0.755964	-0.108096
cg07090813	NM_006623	PHGDH	5.72117e-06	0.306537	0.198448	0.108089
cg08271622	NR_027241;NR_002910;NR_015366	LOC388796;SNORA71B;LOC388796	2.90545e-05	0.791784	0.683716	0.108067
cg16534307	NM_182898;NM_182899;NM_182898	CREB5;CREB5;CREB5	0.0066896	0.415497	0.523559	-0.108062
cg19016062	NM_019046	ANKRD16	0.00110202	0.560953	0.452895	0.108058
cg24629663			6.52956e-06	0.633461	0.741518	-0.108057
cg07575680	NM_138368	DKFZp761E198	0.0013077	0.746995	0.85505	-0.108055
cg22352176			0.00232791	0.236638	0.128588	0.10805
cg24450239			5.77757e-05	0.709345	0.817388	-0.108042
cg05166473	NM_017869;NM_079837	BANP;BANP	0.000591527	0.666415	0.558375	0.10804
cg07081739	NM_005865	PRSS16	6.45615e-05	0.471216	0.363183	0.108032
cg02753903	NM_000540;NM_001042723	RYR1;RYR1	0.0057972	0.673411	0.781424	-0.108013
cg13959831	NM_016734	PAX5	1.5915e-05	0.689819	0.581815	0.108003
cg16814023	NM_021237	SELK	0.00491617	0.63881	0.746779	-0.107969
cg11226808	NM_005427	TP73	0.00252088	0.604315	0.496348	0.107967
cg06943385	NM_002086;NM_203506	GRB2;GRB2	0.00198112	0.891464	0.783504	0.10796
cg10323841	NM_194286	SRRM4	4.6132e-05	0.565862	0.457936	0.107927
cg24762962	NM_173667	FLJ37543	0.0013077	0.845065	0.737187	0.107878
cg12127290	NM_000415;NM_134431	IAPP;SLCO1A2	0.00400884	0.703938	0.596071	0.107867
cg08376141	NM_030651	PRRT1	0.00663553	0.31099	0.418855	-0.107865
cg22103219	NM_020979	SH2B2	0.000925989	0.234317	0.126455	0.107862
cg19720260	NM_182495;NM_182495	FAM55B;FAM55B	0.00272801	0.338803	0.230956	0.107847
cg25762679	NM_080682;NM_001078;NM_001078;NM_080682	VCAM1;VCAM1;VCAM1;VCAM1	0.00539169	0.510503	0.402682	0.107822
cg11438552	NM_016335	PRODH	0.00272801	0.311651	0.203831	0.10782
cg14652587			0.00154733	0.585255	0.693069	-0.107814
cg09179743	NM_024761;NM_020124	MOBKL2B;IFNK	0.000775778	0.839239	0.731458	0.107781
cg26312071	NM_020210	SEMA4B	0.00187028	0.740465	0.63269	0.107775
cg15811515	NR_027011	CSDAP1	0.000647979	0.237992	0.345762	-0.10777
cg05217312	NM_001098500	KIAA1217	0.00318837	0.633782	0.52602	0.107762
cg02099474	NM_017781	CYP2W1	0.0066896	0.424596	0.316841	0.107754
cg06582266	NM_001164673;NM_173660	DOK7;DOK7	0.00770052	0.572453	0.680202	-0.107749
cg01297020	NM_172370;NM_001161814;NM_001161812	DAOA;DAOA;DAOA	0.00770052	0.620553	0.512853	0.1077
cg08805241			0.00539169	0.640671	0.748349	-0.107678
cg14130459	NM_016582;NR_027391	SLC15A3;SLC15A3	0.00198112	0.565722	0.458052	0.107671
cg16699635	NM_002125	HLA-DRB5	0.00223788	0.50298	0.395314	0.107667
cg24476449	NM_014238	KSR1	0.00400884	0.435788	0.328122	0.107666
cg12758082	NM_015205;NM_032189	ATP11A;ATP11A	0.00120089	0.385131	0.492782	-0.107651
cg15417798	NM_014921;NM_001008701	LPHN1;LPHN1	0.00371664	0.234524	0.342147	-0.107623
cg05999010	NM_000333;NM_001128149	ATXN7;ATXN7	0.000709274	0.86128	0.753669	0.107611
cg06483505			0.00198112	0.80083	0.693224	0.107606
cg26558485	NM_178033;NM_178033	CYP4X1;CYP4X1	0.000305694	0.450508	0.558111	-0.107604
cg08599792			0.00318837	0.319849	0.212259	0.10759
cg17201227	NM_003569	STX7	0.000491803	0.275002	0.167414	0.107588
cg18235690	NM_015649;NM_015649	IRF2BP1;IRF2BP1	0.00465502	0.36301	0.255425	0.107585
cg09061993	NM_004619;NM_001033910	TRAF5;TRAF5	0.000925989	0.786878	0.679304	0.107574
cg25190513	NM_006018;NM_006018	GPR109B;GPR109B	0.00272801	0.788527	0.680987	0.107541
cg18616558			0.000647979	0.80878	0.701257	0.107522
cg10384725			0.00432125	0.667546	0.560051	0.107495
cg23760945	NM_032377	ELOF1	0.00168136	0.472175	0.364688	0.107487
cg02088996	NR_027118	LOC285954	0.00432125	0.619911	0.512514	0.107397
cg25249728			0.00154733	0.669286	0.561889	0.107397
cg15506609	NM_152739	HOXA9	0.000310394	0.35499	0.462374	-0.107385
cg27213238	NM_145649	GCNT2	0.00363661	0.551825	0.444443	0.107381
cg07652628	NM_000224;NM_199187	KRT18;KRT18	0.00198112	0.696116	0.803493	-0.107377
cg18520696			0.000591527	0.778749	0.67138	0.107368
cg16417374	NM_020379	MAN1C1	0.00465502	0.247995	0.355345	-0.10735
cg24681573	NM_021107;NM_033363;NM_033362	MRPS12;MRPS12;MRPS12	0.000539576	0.692755	0.585413	0.107342
cg20742389	NM_202470;NM_202468;NM_202494;NM_202467;NM_005716;NM_202469	GIPC1;GIPC1;GIPC1;GIPC1;GIPC1;GIPC1	0.00831808	0.237154	0.129832	0.107322
cg08844313	NM_000440	PDE6A	0.000123209	0.31285	0.205533	0.107316
cg04576021	NM_002120	HLA-DOB	0.000709274	0.27164	0.164327	0.107313
cg17442683	NM_012102;NM_001042681	RERE;RERE	0.00501141	0.498463	0.391186	0.107277
cg09906382	NM_006186	NR4A2	0.000227564	0.627793	0.735053	-0.10726
cg17509893	NM_012250;NM_001102669	RRAS2;RRAS2	0.00622935	0.789095	0.681876	0.107219
cg01923075			0.000305694	0.811343	0.918503	-0.10716
cg25325512	NM_002648	PIM1	0.00182573	0.36758	0.474695	-0.107116
cg13569051	NM_001127664;NM_001127667;NM_001127662;NM_198252;NM_001127665;NM_001127663;NM_001127666	GSN;GSN;GSN;GSN;GSN;GSN;GSN	0.000647979	0.532077	0.639192	-0.107115
cg24185357			0.00232791	0.326	0.433115	-0.107115
cg00168942	NM_153368;NM_153368	GJD4;GJD4	0.00539169	0.40988	0.516983	-0.107103
cg12692069			0.00245962	0.803934	0.696882	0.107052
cg00958944	NM_012316	KPNA6	0.00154733	0.759026	0.651975	0.107051
cg08371190	NR_026986;NR_026989;NR_026987;NR_026988;NR_026985	LOC339524;LOC339524;LOC339524;LOC339524;LOC339524	0.00501141	0.731399	0.838445	-0.107046
cg10609310			0.00371664	0.511579	0.404558	0.107022
cg20291162	NM_024119	DHX58	0.00884283	0.731084	0.624066	0.107018
cg11199827			0.00214826	0.460878	0.353884	0.106994
cg06632549			0.00214826	0.438832	0.331858	0.106974
cg21399778	NM_015148	PASK	0.00946756	0.50067	0.393697	0.106974
cg14844815			0.00198112	0.526802	0.419877	0.106926
cg03783907	NM_197974;NM_006994	BTN3A3;BTN3A3	0.000491803	0.328851	0.221938	0.106913
cg01227084	NM_003021	SGTA	0.00142298	0.813614	0.706712	0.106902
cg21394039	NM_198531	ATP9B	0.00120089	0.721233	0.614335	0.106898
cg18455405	NM_000332;NM_001128164	ATXN1;ATXN1	0.00332773	0.838315	0.731445	0.10687
cg23432301	NM_198451	FOXR2	3.66865e-05	0.766016	0.872883	-0.106868
cg08514311			0.00182573	0.508791	0.401933	0.106858
cg23009042	NM_006574	CSPG5	0.000847879	0.609045	0.502253	0.106792
cg04554195	NM_001005738;NM_001462	FPR2;FPR2	0.00770052	0.584104	0.477323	0.106781
cg18144692			0.00539169	0.715968	0.609195	0.106773
cg02954987	NM_002292	LAMB2	0.0082544	0.527847	0.634589	-0.106743
cg26075408			0.000277283	0.624968	0.518248	0.106719
cg03088219	NM_201591;NM_005277;NM_201592	GPM6A;GPM6A;GPM6A	0.00501141	0.567998	0.674692	-0.106694
cg04742550	NM_000887	ITGAX	0.000847879	0.44125	0.334575	0.106675
cg15549810	NM_001112802	SLC8A1	0.0066896	0.811371	0.704713	0.106658
cg26922917	NM_198827	GPR133	0.00371664	0.780012	0.886658	-0.106646
cg03720605			0.00182573	0.440721	0.334077	0.106643
cg11164649	NM_001135186;NM_016428	ABI3;ABI3	0.00439852	0.650898	0.544281	0.106617
cg01066157	NM_182961;NM_133650;NM_015293;NM_033071	SYNE1;SYNE1;SYNE1;SYNE1	0.00344351	0.805868	0.912466	-0.106598
cg20001810	NM_004693	KRT75	0.00182573	0.594093	0.487522	0.106571
cg14792180	NM_001164440	ANKRD33B	0.00272801	0.631686	0.525132	0.106554
cg07164161	NM_012283	KCNG2	0.00622935	0.472052	0.365501	0.106551
cg26769927	NM_001030288;NM_003123	SPN;SPN	0.00232791	0.27542	0.38196	-0.10654
cg18736739	NM_004721	MAP3K13	0.0014449	0.665876	0.559375	0.106501
cg06130354	NM_015528	RNF167	0.000110886	0.265204	0.158714	0.106491
cg08364654			0.00465502	0.555884	0.662369	-0.106485
cg10081941	NM_016315	GULP1	0.000775778	0.632974	0.526567	0.106407
cg09889350	NM_000078	CETP	0.000136777	0.614315	0.720705	-0.106391
cg03767807	NM_001040439;NM_015133	MAPK8IP3;MAPK8IP3	0.00318837	0.808688	0.702302	0.106386
cg07045241	NM_001005463	EBF3	0.000205893	0.213106	0.319472	-0.106366
cg00733722			0.00198112	0.714852	0.608498	0.106354
cg20316538	NM_198483	RUFY4	0.000775778	0.64266	0.536341	0.106318
cg24762231	NM_006163;NM_001136023	NFE2;NFE2	0.00505029	0.251617	0.357921	-0.106304
cg25398315			0.00110202	0.464835	0.358533	0.106302
cg09166085	NM_031438	NUDT12	0.0082544	0.177892	0.284167	-0.106275
cg09113530	NM_005434;NM_005434	MALL;MALL	0.000539576	0.681584	0.787844	-0.10626
cg22332696	NR_002718	TDGF3	0.00371664	0.326292	0.432551	-0.106259
cg22012156			0.00182573	0.735008	0.628777	0.106231
cg04188920	NM_002627	PFKP	0.00717946	0.640783	0.746979	-0.106196
cg14312538	NM_001792	CDH2	0.0013077	0.130916	0.23709	-0.106173
cg27229100	NR_003030;NR_003605;NR_003606;NR_003604	SNORD12;C20orf199;C20orf199;C20orf199	0.00318837	0.456188	0.350043	0.106144
cg27333952	NM_001287;NM_001114331	CLCN7;CLCN7	0.00232791	0.295821	0.189684	0.106137
cg13173415			0.0066896	0.352058	0.245927	0.106131
cg09643312	NM_014880	CD302	0.00168136	0.292411	0.398531	-0.106121
cg10863922	NM_004155	SERPINB9	0.00272801	0.609748	0.503627	0.10612
cg15886307	NM_007174	CIT	0.0029502	0.510718	0.404651	0.106067
cg04763519			0.0082544	0.624749	0.73081	-0.106061
cg09594635			0.00465502	0.701963	0.59592	0.106043
cg08425678	NM_001135610	PRDM2	0.00214826	0.264343	0.158331	0.106012
cg10741422			0.00770052	0.303725	0.409734	-0.106009
cg26182406			0.000775778	0.580121	0.474121	0.106
cg10661769	NM_001167734;NM_020442;NM_001167733;NM_001517	VARS2;VARS2;VARS2;GTF2H4	0.00198112	0.459912	0.353927	0.105984
cg26697334	NM_018032;NM_201412	LUC7L;LUC7L	0.00770052	0.488216	0.382243	0.105973
cg25763292	NM_033340;NM_033339;NM_033338;NM_001227	CASP7;CASP7;CASP7;CASP7	0.00539169	0.575711	0.469759	0.105952
cg27434487			0.00214826	0.591009	0.696957	-0.105948
cg08660562	NM_001142523;NM_007199	IRAK3;IRAK3	5.99627e-05	0.887364	0.781421	0.105944
cg26140475			3.26654e-05	0.368491	0.262565	0.105926
cg21649604	NM_000967;NM_001033853;NR_000026	RPL3;RPL3;RNU86	0.000186125	0.328734	0.222824	0.10591
cg01876531	NM_025179	PLXNA2	0.00182573	0.516966	0.411062	0.105904
cg13048962	NM_006049	SNAPC5	0.000775778	0.493892	0.38801	0.105882
cg10021924			0.00432125	0.575108	0.46924	0.105867
cg13716034	NR_029637	MIR223	0.00432125	0.413895	0.519756	-0.105861
cg01029637			0.000868459	0.751835	0.64598	0.105855
cg02098619	NM_012102;NM_001042681	RERE;RERE	0.00214826	0.375187	0.269337	0.10585
cg12380441			0.000370631	0.499321	0.393504	0.105817
cg22143562	NM_182607;NM_001170553	VSIG1;VSIG1	0.00214826	0.732744	0.838535	-0.10579
cg19648023	NR_031666	MIR548N	0.00821993	0.825618	0.719863	0.105755
cg03462096			0.00168136	0.765391	0.659636	0.105755
cg00404641	NR_002949;NR_027766	NUDT16P;NUDT16P	2.29128e-05	0.395678	0.501411	-0.105733
cg02417427	NM_178276	SERINC5	0.00168136	0.337936	0.443662	-0.105726
cg24456846			0.00770052	0.24973	0.355448	-0.105718
cg27061485	NM_175931;NM_005187	CBFA2T3;CBFA2T3	0.00539169	0.25442	0.360127	-0.105707
cg10995925	NM_000595;NM_001159740	LTA;LTA	0.00198112	0.400964	0.295282	0.105682
cg19510565	NM_006762	LAPTM5	0.000591527	0.349667	0.243991	0.105676
cg06419219	NR_003955	LOC647121	0.00154733	0.772703	0.667027	0.105676
cg10521767			0.00172636	0.359607	0.253962	0.105644
cg18494902	NM_001003943;NM_033503;NM_001003942;NM_001003940;NM_033503	BMF;BMF;BMF;BMF;BMF	0.00770052	0.571883	0.466287	0.105596
cg11087723			0.00371664	0.826058	0.720466	0.105592
cg07156336	NM_004637	RAB7A	0.0013077	0.387703	0.282133	0.10557
cg11174855	NM_177400	NKX6-2	0.00142298	0.312196	0.417755	-0.105559
cg13315706	NM_000211;NM_001127491	ITGB2;ITGB2	0.00182573	0.319753	0.214194	0.105559
cg07737135	NM_032853;NR_024247	MUM1;MUM1	0.00946756	0.697639	0.80316	-0.105521
cg06929583			0.000407605	0.453841	0.348338	0.105503
cg23441595	NM_013416;NM_000631	NCF4;NCF4	0.000539576	0.371129	0.265627	0.105502
cg26720235			0.00770052	0.630019	0.735515	-0.105496
cg03278271			0.00120089	0.671348	0.565878	0.105469
cg22446998			0.00318837	0.496405	0.390963	0.105442
cg17759095	NM_001144769	DST	0.000370631	0.555511	0.450076	0.105435
cg23200509			4.37527e-06	0.77993	0.885362	-0.105432
cg05788927	NM_001009909	LUZP2	0.000491803	0.775851	0.670422	0.105429
cg08965235	NM_001164266;NM_001130144;NM_021070;NM_001164266	LTBP3;LTBP3;LTBP3;LTBP3	0.000168109	0.229369	0.334797	-0.105428
cg27470213	NM_005567	LGALS3BP	0.000775778	0.269986	0.164574	0.105412
cg01904145	NM_021935;NM_001126128	PROK2;PROK2	0.000775778	0.707981	0.602586	0.105396
cg27183173	NM_002579;NM_001040134	PALM;PALM	3.45852e-05	0.550748	0.656125	-0.105377
cg13836380			0.00272801	0.829101	0.723728	0.105373
cg02608831			0.00371664	0.658483	0.553136	0.105347
cg07091481	NM_032333	C10orf58	0.000336738	0.655146	0.760464	-0.105318
cg26691434	NM_001030288;NM_003123	SPN;SPN	0.0013077	0.329091	0.43438	-0.105289
cg09330145			0.0013077	0.474862	0.369584	0.105278
cg18279625			0.00101055	0.830863	0.725587	0.105276
cg11829633	NM_015316	PPP1R13B	0.00110202	0.851132	0.745889	0.105243
cg15925365	NM_001512	GSTA4	0.00142298	0.637752	0.742985	-0.105233
cg07444963			0.00884283	0.819368	0.714158	0.10521
cg12113851			0.000709274	0.783577	0.678371	0.105206
cg13632630			2.29128e-05	0.484423	0.589613	-0.105191
cg09993145	NM_001031680	RUNX3	0.000775778	0.248942	0.143761	0.105181
cg21204860	NM_001113496;NM_001113492;NM_001113493;NM_001113491;NM_006640;NM_001113494	SEPT9;SEPT9;SEPT9;SEPT9;SEPT9;SEPT9	0.00616239	0.375574	0.270431	0.105143
cg18333339			0.00101055	0.466863	0.571997	-0.105135
cg00257775	NM_021943	ZFAND3	0.00110202	0.412806	0.517926	-0.105121
cg14383078	NM_016734	PAX5	6.45615e-05	0.244318	0.139228	0.10509
cg16909914	NM_198401	ANKRD46	0.00770052	0.563521	0.458432	0.105089
cg09174555	NM_002964	S100A8	0.00232791	0.619419	0.514354	0.105065
cg16896205	NM_001040033	CD53	0.000305694	0.552485	0.447438	0.105047
cg02104893	NM_006714	SMPDL3A	3.66865e-05	0.741761	0.84676	-0.104999
cg19701087	NM_001512	GSTA4	0.00142298	0.557944	0.66293	-0.104986
cg03519879	NM_001043318;NM_194278	C14orf43;C14orf43	0.00371664	0.463231	0.358281	0.10495
cg25985721			0.00198112	0.511764	0.406825	0.104939
cg16618493	NM_015872	ZBTB7B	0.00148474	0.46366	0.358743	0.104917
cg06362282	NM_003782	B3GALT4	0.00154733	0.707976	0.603062	0.104914
cg07964754	NM_021149	COTL1	0.00182573	0.771147	0.666243	0.104904
cg06824277	NM_001099336;NM_198521	C12orf42;C12orf42	0.000447907	0.529504	0.634363	-0.104859
cg05616589			0.00371664	0.443439	0.338593	0.104846
cg22820108	NM_006312;NM_001077261	NCOR2;NCOR2	0.00252088	0.33923	0.444071	-0.104841
cg15046062	NM_153692	HTRA4	0.000336738	0.300544	0.405375	-0.104832
cg09332981	NM_014710;NM_001099411;NM_001099410	GPRASP1;GPRASP1;GPRASP1	8.95659e-05	0.481373	0.586188	-0.104814
cg24671330	NM_198505	ATP13A5	2.90545e-05	0.680459	0.57565	0.104809
cg15572745	NM_004796	NRXN3	0.00622935	0.364707	0.259911	0.104796
cg05673882	NM_016218	POLK	7.2074e-05	0.435545	0.330763	0.104783
cg15324978	NM_145648;NR_026666	SLC15A4;MGC16384	0.00400884	0.872667	0.767903	0.104765
cg27073113	NR_026889;NM_020988;NM_138736	DKFZP434H168;GNAO1;GNAO1	0.00157588	0.14743	0.252179	-0.104749
cg11076160	NM_001042517	DIAPH3	0.00121188	0.791473	0.686731	0.104742
cg11385338			0.000775778	0.612525	0.717259	-0.104734
cg08365609			0.0066896	0.648257	0.543547	0.10471
cg08675521			0.000407605	0.713556	0.608849	0.104707
cg10529555			0.00539169	0.56774	0.672413	-0.104673
cg06495803	NM_001242;NR_015382	CD27;LOC678655	0.00214826	0.356805	0.25214	0.104664
cg10732871	NM_002085;NM_001039847	GPX4;GPX4	0.00884283	0.505318	0.40068	0.104639
cg23754934	NM_148975	MS4A4A	0.00272801	0.570634	0.675248	-0.104613
cg26479374	NM_001328;NM_001012614;NM_052861	CTBP1;CTBP1;C4orf42	2.58154e-05	0.785779	0.681185	0.104594
cg08364772			0.00360288	0.699692	0.595098	0.104594
cg26558111	NM_001102595;NM_020892;NM_001102594;NM_001102596	DTX2;DTX2;DTX2;DTX2	0.000251303	0.691086	0.586517	0.104569
cg11165391			0.00371664	0.725554	0.620986	0.104569
cg13911707	NM_032752	ZNF496	0.000110886	0.655214	0.759778	-0.104563
cg25694755	NM_020178;NM_001082534;NM_001082533	CA10;CA10;CA10	0.00198112	0.676762	0.781309	-0.104547
cg08737116	NM_018420	SLC22A15	0.00132378	0.367673	0.263142	0.104531
cg18556420	NM_015155	LARP4B	0.000847879	0.777052	0.672534	0.104518
cg24743301	NM_001128165;NM_153214	FBLN7;FBLN7	0.00344351	0.553261	0.448745	0.104516
cg02385728	NM_032843;NM_001145106	FIBCD1;FIBCD1	0.000336738	0.797733	0.69322	0.104513
cg21183455	NR_026997	C22orf34	0.0057972	0.748891	0.853379	-0.104489
cg17136255			0.00717946	0.347918	0.243456	0.104462
cg09438075	NM_017993	ENOX1	0.00344351	0.684884	0.789343	-0.104458
cg03906115	NM_001166265;NM_000627;NM_206943;NM_001166264;NM_001166266	LTBP1;LTBP1;LTBP1;LTBP1;LTBP1	0.00344351	0.562862	0.667308	-0.104447
cg00285394	NM_003129	SQLE	0.000847879	0.641633	0.537199	0.104434
cg04742719	NM_020246;NM_003302	SLC12A9;TRIP6	0.000205893	0.459431	0.563836	-0.104405
cg27443224	NM_002989;NM_002989	CCL21;CCL21	0.00232791	0.551621	0.447231	0.104391
cg14628982	NM_001170585;NM_153021	PLB1;PLB1	0.000168109	0.755783	0.651393	0.10439
cg10974219	NM_001146312;NM_153604	MYOCD;MYOCD	0.000775778	0.634225	0.529841	0.104383
cg12062672	NM_020637	FGF22	0.000205893	0.673595	0.569228	0.104366
cg15825928			4.11601e-05	0.732765	0.837102	-0.104337
cg10136841	NM_002121	HLA-DPB1	0.00142298	0.619501	0.515172	0.104328
cg02229095	NM_030580	ZNF34	0.00198112	0.431705	0.327383	0.104322
cg06825878			0.0066896	0.700563	0.596304	0.104259
cg27124742	NM_182699	DDX53	0.000847879	0.779164	0.883417	-0.104253
cg12022621	NM_017773;NM_001136190;NM_017773	LAX1;LAX1;LAX1	0.00622935	0.435652	0.331404	0.104247
cg25434864			0.000370631	0.773641	0.877884	-0.104244
cg27214730	NM_004443	EPHB3	0.00214826	0.632723	0.52849	0.104233
cg14411221	NM_001008726;NM_080666	WDR89;WDR89	0.0057972	0.727793	0.623611	0.104182
cg06128198	NM_001380	DOCK1	0.0029502	0.216692	0.320856	-0.104164
cg19235307	NM_052990;NM_018262;NM_003925;NM_052985;NM_052989	IFT122;IFT122;MBD4;IFT122;IFT122	0.000407605	0.684051	0.788203	-0.104152
cg09452082			0.00232791	0.285461	0.389606	-0.104146
cg11399254	NM_003189	TAL1	0.00501141	0.360443	0.464579	-0.104136
cg00032884	NM_002158	FOXN2	0.00371664	0.70024	0.596111	0.104129
cg04475027	NM_001136103	TMEM132C	0.00432125	0.278366	0.382484	-0.104119
cg20668718	NM_014790	JAKMIP2	8.95659e-05	0.766076	0.661967	0.104109
cg14596108	NM_001082967;NM_015381	FAM19A5;FAM19A5	0.00539169	0.745802	0.641715	0.104087
cg07584860	NR_001434	HLA-H	0.00729082	0.446778	0.55086	-0.104082
cg00662956			0.00198112	0.357827	0.253754	0.104074
cg12360084	NM_144704;NM_001018060;NR_027464;NM_001146288	AIFM3;AIFM3;AIFM3;AIFM3	0.00120089	0.544827	0.440755	0.104072
cg04967410	NM_014732	KIAA0513	0.00465502	0.566419	0.670487	-0.104068
cg19782686	NM_145207	SPATA5	0.00432125	0.344973	0.449025	-0.104052
cg05017639	NM_001145204	SHISA9	0.00318837	0.624349	0.520298	0.104051
cg23172671			0.0066896	0.426377	0.322342	0.104035
cg08593157	NR_024007;NM_030665	SMCR5;RAI1	0.00770052	0.616171	0.720189	-0.104019
cg26876834	NR_003142;NR_002326;NR_002327;NM_002952	SNHG9;SNORA64;SNORA10;RPS2	0.00491617	0.760982	0.656966	0.104017
cg11870206	NM_001024656;NM_001114598;NM_001024656	ASPDH;ASPDH;ASPDH	0.00198112	0.489475	0.593453	-0.103978
cg22414262	NR_030414	MIR802	0.00154733	0.48199	0.585968	-0.103978
cg26636045			0.00318837	0.23441	0.338382	-0.103972
cg25215028			0.00611481	0.433001	0.329031	0.10397
cg16462006			0.00717946	0.502839	0.606806	-0.103967
cg04610450	NM_005027	PIK3R2	8.95659e-05	0.269767	0.165801	0.103965
cg02660277	NM_002847;NM_130842;NM_130843	PTPRN2;PTPRN2;PTPRN2	0.00182573	0.794652	0.690696	0.103956
cg03942932			0.000775778	0.32002	0.423971	-0.103951
cg10303698	NM_017949	CUEDC1	0.00232791	0.363058	0.259127	0.103931
cg04367427			0.00371664	0.71137	0.815284	-0.103914
cg19229651			0.00501142	0.744453	0.640563	0.10389
cg13664588	NR_004395	SNORD1A	0.00252088	0.666065	0.562191	0.103873
cg17379932	NM_015542;NM_080599	UPF2;UPF2	0.00616239	0.370362	0.266513	0.103849
cg08809405			0.000336738	0.728316	0.832157	-0.103841
cg08441314	NM_003105	SORL1	0.00465502	0.706977	0.603158	0.10382
cg14678088	NM_007118	TRIO	0.000227564	0.805464	0.701647	0.103817
cg14290450	NM_206918	DEGS2	0.000227564	0.82507	0.721262	0.103808
cg09825327	NM_004619;NM_001033910	TRAF5;TRAF5	0.000370631	0.300438	0.196654	0.103783
cg00301372			0.00400884	0.585032	0.481269	0.103763
cg17387122	NM_001136004;NM_015241;NM_001122731	MICAL3;MICAL3;MICAL3	0.00602163	0.458469	0.354748	0.103721
cg26379258	NR_028338;NM_001164283;NM_001164283;NM_001164281;NM_001164282;NM_147686	TRAF3IP2;TRAF3IP2;TRAF3IP2;TRAF3IP2;TRAF3IP2;TRAF3IP2	0.00344351	0.202173	0.305883	-0.103711
cg20411813	NM_001231	CASQ1	0.00432125	0.437646	0.333966	0.103681
cg13910377	NR_024367	NCRNA00111	0.00214826	0.341772	0.445445	-0.103673
cg11032707	NR_033252;NM_001482	LOC145663;GATM	0.00198112	0.536216	0.432568	0.103648
cg26369382	NM_003227	TFR2	0.000539576	0.659435	0.555818	0.103616
cg08913410			0.00432125	0.648047	0.544481	0.103566
cg18028470	NM_017837	PIGV	0.00371664	0.591495	0.487936	0.103559
cg25357825	NM_014667	VGLL4	0.000336738	0.388462	0.492014	-0.103553
cg07496173			0.00214826	0.617936	0.721487	-0.103551
cg17327331	NM_022474	MPP5	0.00622935	0.425653	0.529192	-0.103539
cg01003666			0.00432125	0.520517	0.416986	0.103531
cg06369349	NM_006666	RUVBL2	2.29128e-05	0.354837	0.251313	0.103524
cg14413354			0.000277283	0.331505	0.227997	0.103508
cg24474852	NM_000029;NM_000029	AGT;AGT	0.00168136	0.349909	0.453409	-0.1035
cg18020065	NM_007368	RASA3	0.00272801	0.693661	0.590174	0.103486
cg24535823	NM_001042532;NM_025233;NM_001042530;NM_001042529;NM_001042531	COASY;COASY;COASY;COASY;COASY	0.00232791	0.789792	0.686337	0.103456
cg19751930	NM_013385	CYTH4	0.00232791	0.369427	0.265972	0.103454
cg01716252	NM_015833;NM_001160230;NM_001112;NR_027674;NR_027672;NM_015834;NR_027673	ADARB1;ADARB1;ADARB1;ADARB1;ADARB1;ADARB1;ADARB1	0.000447907	0.626998	0.730441	-0.103443
cg27619291	NM_007332	TRPA1	0.00101353	0.571723	0.675143	-0.10342
cg16186396			0.000249092	0.81902	0.715616	0.103403
cg15006828			0.0029502	0.531411	0.428047	0.103363
cg03540589	NM_033027	CSRNP1	0.00884283	0.340592	0.443954	-0.103362
cg14264496	NR_024455	LOC100133612	0.00101055	0.315004	0.211646	0.103358
cg20595453	NM_022553	VPS52	0.00539169	0.496913	0.60026	-0.103347
cg26696162	NM_020861	ZBTB2	0.0082544	0.342615	0.445953	-0.103338
cg03411938	NM_000218;NR_002728;NM_181798	KCNQ1;KCNQ1OT1;KCNQ1	0.000251303	0.547165	0.650472	-0.103307
cg01055594	NM_020779;NM_001006657	WDR35;WDR35	0.000539576	0.655413	0.758711	-0.103299
cg21664281			0.000151703	0.701192	0.804487	-0.103295
cg14769207	NM_005069;NM_009586	SIM2;SIM2	9.97036e-05	0.343384	0.446671	-0.103287
cg00635590			0.00770052	0.478685	0.375401	0.103284
cg27370573	NM_177526;NM_003712;NM_177543	PPAP2C;PPAP2C;PPAP2C	0.00400884	0.748474	0.85175	-0.103276
cg01789501			0.00154733	0.723917	0.620642	0.103275
cg03882382	NM_052972	LRG1	5.77757e-05	0.407336	0.304065	0.103271
cg05175803	NM_002231;NM_001024844	CD82;CD82	0.00214826	0.504448	0.401181	0.103267
cg09236311	NM_001002026;NM_016369	CLDN18;CLDN18	5.00641e-06	0.750852	0.647603	0.103249
cg13377102	NM_004732	KCNAB3	0.00240465	0.867557	0.764323	0.103234
cg07329251	NM_001025389;NM_001025390;NM_000480	AMPD3;AMPD3;AMPD3	0.00198112	0.310981	0.20779	0.103191
cg04163638	NM_030797	FAM49A	0.000847879	0.816777	0.713589	0.103188
cg00408605	NM_001160372;NM_031466	TRAPPC9;TRAPPC9	0.0014449	0.828627	0.725456	0.103171
cg17044159			0.00154733	0.275311	0.378422	-0.103111
cg27567922	NM_018406;NM_138297;NM_004532	MUC4;MUC4;MUC4	0.00432125	0.83397	0.730864	0.103105
cg22512367			0.00168136	0.775331	0.672244	0.103087
cg21659714	NM_207368;NM_001093767	FAM195B;FAM195B	0.000227564	0.717264	0.614195	0.103069
cg22509845			0.00884283	0.617687	0.514627	0.103061
cg19325791			0.000591527	0.496621	0.599677	-0.103057
cg25191850	NM_002245	KCNK1	0.000407605	0.210456	0.313496	-0.10304
cg21618521	NM_003782	B3GALT4	0.000847879	0.617992	0.514954	0.103038
cg10431747	NM_032884;NM_001134734	C1orf94;C1orf94	0.00101055	0.354402	0.457439	-0.103038
cg06159340	NM_001142544;NM_001330	CTF1;CTF1	0.00198112	0.627697	0.730728	-0.10303
cg17082225			0.0057972	0.720445	0.823447	-0.103002
cg06192883	NM_018728	MYO5C	9.97036e-05	0.461867	0.358865	0.103002
cg08169020	NM_004926	ZFP36L1	0.0013077	0.528587	0.425588	0.103
cg03930929	NM_020873	LRRN1	0.00110202	0.706768	0.603772	0.102997
cg02980499	NM_001114094;NM_013314	BLNK;BLNK	0.00432125	0.459583	0.356607	0.102976
cg18708233	NM_138357	CCDC109A	0.000539576	0.471814	0.36886	0.102954
cg15075241	NR_028374;NM_002539	SNORA80B;ODC1	0.00344351	0.617357	0.514409	0.102947
cg07842386	NM_144701	IL23R	0.00166278	0.764777	0.661837	0.10294
cg26234223	NM_006363;NM_032985;NM_032986	SEC23B;SEC23B;SEC23B	0.00622935	0.313958	0.416893	-0.102935
cg19514721			0.000447907	0.704917	0.807833	-0.102916
cg07469926	NM_018700;NM_001017397;NM_001017398	TRIM36;TRIM36;TRIM36	0.00465502	0.690424	0.793306	-0.102883
cg17383203	NM_016447	MPP6	0.0020903	0.607903	0.505024	0.102879
cg05819223	NM_005012;NM_001083592	ROR1;ROR1	0.00539169	0.695463	0.592598	0.102866
cg27154651			0.00232791	0.569152	0.672008	-0.102856
cg22529184	NM_198493	ANKRD45	0.00110202	0.788032	0.685178	0.102854
cg03846249			0.00101055	0.297303	0.194456	0.102847
cg01560676	NM_001031711	ERGIC1	0.00154733	0.537862	0.435019	0.102843
cg27308982	NM_006162;NM_172388;NM_172389;NM_172387;NM_172390	NFATC1;NFATC1;NFATC1;NFATC1;NFATC1	0.00770052	0.816928	0.714089	0.102838
cg10102102			0.00432125	0.728375	0.625557	0.102818
cg25989526			0.00252088	0.210232	0.31304	-0.102808
cg17033086			0.000925989	0.699713	0.596917	0.102796
cg03284554	NM_152419	HGSNAT	1.5915e-05	0.350621	0.453417	-0.102795
cg13500877	NM_006186	NR4A2	0.000491803	0.722831	0.825597	-0.102766
cg17470251	NM_001130518;NM_001130518;NR_024040;NM_018371	CSGALNACT1;CSGALNACT1;CSGALNACT1;CSGALNACT1	0.00110202	0.688299	0.791024	-0.102725
cg04932755	NM_004429	EFNB1	0.000447907	0.321974	0.219253	0.102721
cg17504164			1.5915e-05	0.744472	0.641765	0.102707
cg07201475			0.00272801	0.683628	0.7863	-0.102672
cg20927119	NM_001164458;NM_001164459;NM_001164459	ACTR3C;ACTR3C;ACTR3C	0.000539576	0.620169	0.722798	-0.102629
cg05304729	NM_002432	MNDA	0.0029502	0.50341	0.400782	0.102628
cg10913077	NM_001128615	ARHGEF3	0.000407605	0.447411	0.344837	0.102574
cg12840847	NM_001143999;NM_003003;NM_001143998;NM_001039573;NM_001144001	SEC14L1;SEC14L1;SEC14L1;SEC14L1;SEC14L1	0.00344351	0.785248	0.682678	0.10257
cg14688879			0.00252088	0.713435	0.610869	0.102565
cg06959635	NM_005369;NM_001099855	MCF2;MCF2	0.000647979	0.590702	0.693254	-0.102552
cg03391657	NR_003955	LOC647121	0.00120089	0.482131	0.379581	0.102551
cg12954334	NM_022916	VPS33A	0.00110202	0.820821	0.718274	0.102547
cg16207110			0.00101055	0.243873	0.14133	0.102542
cg10888790			0.000205893	0.244503	0.34704	-0.102536
cg22229039			0.0057972	0.537996	0.640524	-0.102528
cg16097772	NM_000239	LYZ	0.000591527	0.72129	0.823814	-0.102524
cg26682661	NM_005107;NM_001145464	EXOG;EXOG	7.71558e-06	0.45019	0.552679	-0.102489
cg05242915			0.000775778	0.583562	0.481079	0.102483
cg27159979	NM_022893;NM_138559;NM_018014	BCL11A;BCL11A;BCL11A	0.00232791	0.581145	0.478677	0.102468
cg12000587	NM_018405	C17orf79	0.000847879	0.3965	0.294047	0.102453
cg25196389	NM_022462;NM_152795;NM_152794	HIF3A;HIF3A;HIF3A	0.00232791	0.675948	0.778401	-0.102453
cg06528575	NM_001142473;NM_001142472;NM_005449	FAIM3;FAIM3;FAIM3	0.00884283	0.191001	0.29345	-0.102449
cg24931355	NM_030665	RAI1	0.00120089	0.209382	0.311828	-0.102445
cg23750365	NM_002121	HLA-DPB1	0.00501141	0.677262	0.574834	0.102428
cg19919383	NM_001144382;NM_015184	PLCL2;PLCL2	0.00887355	0.68835	0.790767	-0.102417
cg05506600			0.0013077	0.474152	0.576546	-0.102394
cg19109050	NM_001098623;NM_052843	OBSCN;OBSCN	0.00371664	0.535354	0.637721	-0.102368
cg06436658	NM_001101426;NM_001101417	ISPD;ISPD	0.00272801	0.806673	0.704316	0.102356
cg11417178			0.0066896	0.736929	0.839274	-0.102346
cg04902838	NM_152744	SDK1	0.000407605	0.880228	0.777896	0.102332
cg24740320			0.0022798	0.636674	0.534353	0.102321
cg21179088	NM_182546	VSTM2A	0.0013077	0.31118	0.4135	-0.10232
cg01692968			2.29128e-05	0.272403	0.374695	-0.102292
cg06987246	NM_017560	ZNF853	0.000591527	0.521123	0.418848	0.102275
cg15832300	NM_001098576;NM_003217	TMBIM6;TMBIM6	0.00154733	0.365464	0.263221	0.102243
cg02213045	NM_153246	C6orf223	0.00252088	0.656932	0.554698	0.102235
cg20154206	NM_032740	SFT2D3	0.000447907	0.705048	0.602815	0.102233
cg25030266	NM_033397	ITPRIP	0.000336738	0.282083	0.179853	0.10223
cg20427144	NM_024963	FBXL18	0.00318837	0.343633	0.445854	-0.102222
cg25444839	NM_001099408;NM_003085;NM_001001502;NM_001099408	EIF4E1B;SNCB;SNCB;EIF4E1B	0.00171743	0.432679	0.330458	0.102222
cg03887438	NM_001012393	OPCML	0.000647979	0.592997	0.695204	-0.102207
cg04148163			0.00182573	0.731551	0.629357	0.102194
cg08619295			0.0082544	0.223658	0.325824	-0.102165
cg05483534	NM_012249	RHOQ	0.00884283	0.509554	0.407401	0.102153
cg03582327	NM_001171160;NM_001171158;NM_001171157;NM_001171156;NM_033130;NM_001171159;NM_001171161	SIGLEC10;SIGLEC10;SIGLEC10;SIGLEC10;SIGLEC10;SIGLEC10;SIGLEC10	0.00182573	0.7151	0.612953	0.102147
cg14446165	NM_001134398;NM_003371	VAV2;VAV2	0.000647979	0.625911	0.523829	0.102082
cg01533849			4.75085e-05	0.490156	0.592212	-0.102056
cg13940444	NM_000966	RARG	0.00344351	0.211795	0.313832	-0.102037
cg04286697	NM_145236	B3GNT7	0.00272801	0.604243	0.502211	0.102031
cg07782241	NM_001135731;NM_024645	ZMAT4;ZMAT4	2.29128e-05	0.57322	0.471204	0.102016
cg10416668	NM_021798;NM_181078;NM_181079	IL21R;IL21R;IL21R	0.0066896	0.363032	0.261046	0.101986
cg21605283	NM_138328	RHBDL3	0.00198112	0.359949	0.461933	-0.101984
cg19795292	NM_016232;NM_003856	IL1RL1;IL1RL1	0.00318837	0.608848	0.710822	-0.101974
cg04190888			0.00272801	0.296826	0.194873	0.101953
cg16928487	NM_001005291;NM_004176	SREBF1;SREBF1	0.00232791	0.33282	0.434749	-0.101929
cg07847989	NM_000868	HTR2C	0.000370631	0.664645	0.766568	-0.101923
cg23856267			0.0029502	0.331288	0.433187	-0.101899
cg05358758	NM_033448	KRT71	0.00261093	0.704065	0.602167	0.101898
cg03382306			0.00132378	0.744281	0.642384	0.101897
cg09474017	NM_019105	TNXB	0.000591527	0.417137	0.315247	0.10189
cg06294384			0.00252088	0.618514	0.516631	0.101883
cg17996401			0.000151703	0.199414	0.301282	-0.101868
cg08076102	NM_005940	MMP11	0.000847879	0.665663	0.767515	-0.101852
cg23639565	NM_006367;NM_001105530	CAP1;CAP1	0.000186125	0.31442	0.21257	0.10185
cg00673685	NM_001004308	ZCCHC16	0.00717946	0.399065	0.297222	0.101843
cg22437699	NM_139058	ARX	0.00344351	0.424312	0.526097	-0.101785
cg14068057			0.00717946	0.815057	0.713354	0.101703
cg15979932	NM_017949	CUEDC1	0.00344351	0.461538	0.359838	0.1017
cg25694915	NM_001171631;NM_052946;NM_001171632;NM_001039724	NOSTRIN;NOSTRIN;NOSTRIN;NOSTRIN	0.00383077	0.734733	0.836428	-0.101695
cg27541604	NM_004833;NM_004833	AIM2;AIM2	0.00252088	0.495409	0.393735	0.101674
cg16996281	NM_031433;NM_015645	MFRP;C1QTNF5	0.0029502	0.585245	0.48358	0.101665
cg01471111	NM_016615	SLC6A13	0.00214826	0.715871	0.817524	-0.101653
cg04144521	NM_017694	MFSD6	0.000305694	0.586956	0.688606	-0.10165
cg08445263	NM_033223	GABRG3	0.000227564	0.298596	0.400234	-0.101638
cg11657817	NM_130794;NM_080830	CST11;CST11	0.000305694	0.544421	0.442783	0.101638
cg05657208	NM_001033855;NM_022487;NM_001033857;NM_001033858	DCLRE1C;DCLRE1C;DCLRE1C;DCLRE1C	0.00252088	0.627431	0.52581	0.101622
cg00781208	NM_020762	SRGAP1	0.00318837	0.704565	0.806186	-0.101621
cg19800670			0.00360288	0.712263	0.813808	-0.101545
cg03694279			0.000251303	0.472799	0.574344	-0.101545
cg02556928	NM_000395	CSF2RB	0.00539169	0.448345	0.346812	0.101533
cg10315334	NM_002985;NM_002985	CCL5;CCL5	0.00110202	0.565141	0.46364	0.1015
cg27321942	NR_026712;NR_000020;NR_000018;NR_000019;NM_012423;NR_000021	RPL13AP5;SNORD33;SNORD35A;SNORD34;RPL13A;SNORD32A	0.000539576	0.683909	0.582412	0.101497
cg23688479	NM_001134848	CCDC152	1.5915e-05	0.723666	0.825159	-0.101493
cg15172739	NR_002561;NR_000008;NR_002560;NR_003098	SNORD30;SNORD22;SNORD31;SNHG1	0.00622935	0.685495	0.584012	0.101483
cg26546113	NM_001357	DHX9	0.000925989	0.657866	0.556409	0.101457
cg10219816	NM_014638	PLCH2	0.00232791	0.777522	0.67608	0.101441
cg09232906	NM_014641	MDC1	0.00110202	0.674944	0.573518	0.101426
cg09730369	NR_002768;NM_001080956;NM_001080951;NM_001080953;NM_001080952;NM_002656;NM_001080955;NM_001080954;NM_006718	HYMAI;PLAGL1;PLAGL1;PLAGL1;PLAGL1;PLAGL1;PLAGL1;PLAGL1;PLAGL1	0.0013077	0.649865	0.751273	-0.101407
cg00907272			0.00110202	0.26965	0.371049	-0.1014
cg13804377	NM_033467	MMEL1	0.00717946	0.613453	0.714853	-0.1014
cg06178073	NR_024553	ZNF204P	0.00198112	0.435551	0.536945	-0.101394
cg06525651	NM_001039762;NM_001039762;NM_001380	FAM196A;FAM196A;DOCK1	3.66865e-05	0.265486	0.36688	-0.101394
cg15815827	NM_022105;NM_080797;NM_033081;NM_080796	DIDO1;DIDO1;DIDO1;DIDO1	0.00884283	0.239827	0.341208	-0.101381
cg14544831	NM_000633;NM_000657	BCL2;BCL2	0.000847879	0.424975	0.323596	0.10138
cg25720114	NM_001017978	CXorf61	0.000168109	0.741129	0.842473	-0.101344
cg23236959	NM_153026	PRICKLE1	0.000775778	0.810368	0.709028	0.10134
cg20115597	NR_029420	LOC650226	0.000186125	0.615331	0.716655	-0.101324
cg22029774			0.000847879	0.812435	0.711134	0.101301
cg23267665	NM_015866;NM_001135610;NM_012231	PRDM2;PRDM2;PRDM2	0.000323097	0.763162	0.661876	0.101286
cg15676988			0.00266955	0.428146	0.529419	-0.101272
cg09012633	NR_027335;NR_027336	LOC100130015;LOC100130015	0.000925989	0.315584	0.416833	-0.101249
cg01133413	NM_130467;NM_001013435	PAGE5;PAGE5	1.79907e-05	0.701598	0.802825	-0.101228
cg15545247	NM_006018;NM_006018	GPR109B;GPR109B	0.00318837	0.728209	0.626984	0.101225
cg21027526	NM_030670;NM_030671;NM_030669;NM_030668;NM_002848;NM_030667	PTPRO;PTPRO;PTPRO;PTPRO;PTPRO;PTPRO	0.0013077	0.582977	0.684168	-0.101191
cg14239307	NM_001143764;NM_001143763;NM_130784	SYCE1;SYCE1;SYCE1	0.00717946	0.747181	0.848365	-0.101184
cg26810767			0.00622935	0.615374	0.514196	0.101177
cg17050756	NR_015410	FLJ22536	0.00501141	0.428344	0.327186	0.101157
cg14649507	NM_001012516;NM_030926;NM_001012514	ITM2C;ITM2C;ITM2C	0.00318837	0.311003	0.412141	-0.101138
cg03817667	NM_182546	VSTM2A	0.00168136	0.374629	0.47575	-0.101121
cg25200182			0.00371664	0.255634	0.154518	0.101116
cg21876925	NM_003326	TNFSF4	0.00110202	0.262085	0.363178	-0.101093
cg01984511	NM_004416;NM_004416	DTX1;DTX1	0.00214826	0.39526	0.294196	0.101064
cg12298755	NM_022805;NM_022804;NM_003097;NM_022808;NM_022807;NM_005678;NM_022806	SNRPN;SNURF;SNRPN;SNRPN;SNRPN;SNURF;SNRPN	0.000110886	0.590386	0.691437	-0.101051
cg00647820	NM_024119	DHX58	7.2074e-05	0.198801	0.0977508	0.10105
cg20118717	NM_006772	SYNGAP1	0.00252088	0.324668	0.425703	-0.101036
cg00869668	NM_003693;NM_145352;NM_145352;NR_028076;NM_003693;NR_028075;NM_145350;NM_145350	SCARF1;SCARF1;SCARF1;SCARF1;SCARF1;SCARF1;SCARF1;SCARF1	0.00491617	0.325185	0.426211	-0.101026
cg17825400	NM_001077269;NM_003387	WIPF1;WIPF1	0.00168136	0.431327	0.33031	0.101017
cg10468737	NM_203408;NM_203408	FAM47A;FAM47A	0.00318837	0.783762	0.884767	-0.101005
cg12630576			0.000305694	0.329819	0.228833	0.100986
cg00806239	NM_001146019;NM_080604;NM_001146020;NM_001146016;NR_027394;NM_001146017;NM_001146018	TJAP1;TJAP1;TJAP1;TJAP1;TJAP1;TJAP1;TJAP1	0.00120089	0.308685	0.2077	0.100985
cg15594550	NM_030895	ZNF696	0.000277283	0.683588	0.784454	-0.100865
cg21386586	NM_002929;NM_002929	GRK1;GRK1	0.000709274	0.527951	0.628796	-0.100845
cg19846758	NM_001171689;NM_020769	AMMECR1;RGAG1	0.00884283	0.336838	0.437682	-0.100843
cg03291819	NM_021785	RAI2	0.000136777	0.60798	0.70881	-0.10083
cg14597723	NM_015016	MAST3	0.00272801	0.753112	0.652283	0.100829
cg23679141	NM_001166373;NM_012403	MARCH1;ANP32C	0.00252088	0.417967	0.317138	0.100829
cg03851835	NM_017515	SLC35F2	0.00884283	0.384488	0.283666	0.100823
cg22960869	NM_016428;NM_031498;NM_001135186	ABI3;GNGT2;ABI3	0.00252088	0.304764	0.203942	0.100822
cg21044572			0.000251303	0.662223	0.763023	-0.100799
cg16962557	NM_152680	TMEM154	0.000491803	0.571383	0.470587	0.100796
cg05759718	NM_032785;NM_032785	AGBL4;AGBL4	0.00400884	0.190779	0.291571	-0.100792
cg07601804	NM_001215	CA6	2.51805e-06	0.373169	0.272423	0.100746
cg12392519	NM_001143804;NM_178500	PHOSPHO1;PHOSPHO1	0.000370631	0.499785	0.399051	0.100735
cg14844236	NM_004642	CDK2AP1	3.81861e-06	0.392894	0.493597	-0.100703
cg11058916			0.000591527	0.742427	0.843119	-0.100692
cg13392022	NM_001025107	ADAR	0.0066896	0.528369	0.427679	0.10069
cg04467093	NM_003202	TCF7	0.00198112	0.426923	0.527613	-0.10069
cg18972123	NM_000242	MBL2	0.000447907	0.654376	0.553695	0.100682
cg11086695			0.000205893	0.698971	0.799631	-0.100659
cg21761853	NM_005803	FLOT1	4.96485e-05	0.317051	0.216401	0.10065
cg13445177	NM_002966	S100A10	4.6132e-05	0.764996	0.664358	0.100638
cg22891070	NM_152795;NM_022462	HIF3A;HIF3A	4.6132e-05	0.733524	0.834142	-0.100618
cg10825847	NM_001136111;NM_001136109;NM_004347;NR_024239;NM_001136110;NM_001136112	CASP5;CASP5;CASP5;CASP5;CASP5;CASP5	0.000227564	0.549662	0.449056	0.100606
cg14523847	NM_001039350;NM_001039350	DPP6;DPP6	0.00142298	0.394452	0.495035	-0.100583
cg16405432			0.00400884	0.417965	0.518529	-0.100564
cg06323332	NM_015246;NM_001142291;NM_001142290;NM_001142289	MGRN1;MGRN1;MGRN1;MGRN1	0.00110202	0.339019	0.439543	-0.100524
cg15867307			0.000407605	0.770518	0.670005	0.100513
cg17204113			0.00465502	0.2874	0.38788	-0.10048
cg26992245			0.000407605	0.7966	0.696132	0.100468
cg21667061	NM_024611;NM_001018089	NARG2;NARG2	0.00717946	0.586617	0.486167	0.100451
cg06598836			0.000591527	0.272956	0.373401	-0.100445
cg04581516			0.000205893	0.742226	0.641787	0.100439
cg21169779	NM_197956	NAIF1	0.000709274	0.742894	0.843328	-0.100434
cg00466334	NM_152380	TBX15	0.00272801	0.246772	0.347197	-0.100425
cg18663307	NM_001127491;NM_000211	ITGB2;ITGB2	0.00154733	0.71358	0.61316	0.10042
cg12153480	NM_001967	EIF4A2	0.00101055	0.736862	0.636454	0.100408
cg06629713			0.000251303	0.639077	0.538669	0.100408
cg23860337			0.00717946	0.298887	0.198484	0.100403
cg19499884	NM_032429	LZTS2	0.00142298	0.174837	0.275231	-0.100394
cg03339537	NM_006186	NR4A2	0.00622935	0.295718	0.396106	-0.100388
cg26257814	NR_027257	FLJ26850	0.000168109	0.253368	0.152994	0.100374
cg21179705			0.00272801	0.75824	0.657879	0.100361
cg06645921	NM_153449	SLC2A14	0.000591527	0.276974	0.377335	-0.100361
cg14016344	NM_001782	CD72	0.000168109	0.413555	0.313219	0.100336
cg17815933	NM_018416	FOXJ2	0.000552276	0.170815	0.271151	-0.100335
cg04722215	NM_212481	ARID5A	0.000370631	0.359419	0.25909	0.100329
cg00530870	NM_144725	TTC23L	0.000123209	0.570502	0.67076	-0.100258
cg15746427	NM_181532	ERAS	0.000447907	0.714322	0.814534	-0.100212
cg13325231	NM_030782	CLPTM1L	0.0029502	0.594803	0.494594	0.100209
cg18675847	NM_001166693	AFF1	0.00946756	0.487741	0.587938	-0.100198
cg12743031	NM_173175;NM_004103;NM_173174;NM_173176	PTK2B;PTK2B;PTK2B;PTK2B	0.000305694	0.404372	0.304181	0.100191
cg17840047			0.000447907	0.800114	0.699924	0.10019
cg12930392	NM_002577	PAK2	0.00371664	0.269761	0.369931	-0.10017
cg06825415			0.00455336	0.789524	0.689356	0.100168
cg22539431	NM_014390	SND1	0.000407605	0.48685	0.386688	0.100162
cg11141696			0.000847879	0.790567	0.690408	0.10016
cg02245467	NM_021020	LZTS1	0.000136777	0.629377	0.72953	-0.100153
cg21854952	NM_001098202;NM_006497	HIC1;HIC1	0.00371664	0.322954	0.222803	0.100151
cg17271585	NM_001167821;NM_001167823;NM_001167820;NM_001167822;NM_006698	BLCAP;BLCAP;BLCAP;BLCAP;BLCAP	0.0013077	0.401177	0.301032	0.100145
cg25926515	NM_030625	TET1	0.00120089	0.377983	0.478114	-0.100131
cg18974084	NM_001008537	KIAA2022	0.00168136	0.799941	0.900058	-0.100116
cg21698310	NM_032595	PPP1R9B	0.000647979	0.253165	0.153052	0.100113
cg08412215			0.00182573	0.50943	0.409344	0.100086
cg11385536	NM_020247	CABC1	0.00110202	0.617023	0.516939	0.100084
cg22574818	NM_014061;NM_014061	MAGEH1;MAGEH1	0.000591527	0.60864	0.708722	-0.100082
cg09549813	NM_013399	C16orf5	0.000305694	0.247557	0.347621	-0.100065
cg24320673	NM_007261	CD300A	0.00884283	0.542277	0.642341	-0.100064
cg08243524	NM_024898	DENND1C	0.000123209	0.279154	0.179126	0.100028
cg00311984	NM_000445;NM_032789	PLEC1;PARP10	8.03836e-05	0.48321	0.38323	0.0999799
cg11209447	NM_001159575;NM_001159576;NM_001038	SCNN1A;SCNN1A;SCNN1A	0.0013077	0.60714	0.507168	0.0999722
cg16585946			0.0002921	0.451887	0.351929	0.0999584
cg03802185	NM_020979	SH2B2	0.000491803	0.432254	0.332304	0.0999502
cg10636896			0.00142298	0.731884	0.631937	0.0999471
cg02723774	NM_001080779;NM_033375;NM_001080950	MYO1C;MYO1C;MYO1C	0.00198112	0.566555	0.466623	0.0999323
cg17578341			0.00465502	0.81893	0.71901	0.0999197
cg12161893	NM_031917	ANGPTL6	0.00203521	0.767649	0.667731	0.0999183
cg15638239	NM_032415	CARD11	0.0029502	0.75225	0.652359	0.0998902
cg20239333	NM_174937	TCERG1L	0.00182573	0.566981	0.467104	0.0998771
cg06437100	NM_170664;NM_001161683;NM_144672	OTOA;OTOA;OTOA	0.000925989	0.467026	0.367149	0.0998768
cg14717752	NM_138348	FAM105B	0.00344351	0.39874	0.298871	0.0998686
cg09373037	NM_031912;NM_181519	SYT15;SYT15	9.97036e-05	0.29459	0.394455	-0.099865
cg11188837	NM_001002916;NR_031657	H2BFWT;MIR1256	0.000709274	0.672359	0.772209	-0.0998501
cg07343027	NM_022156	DUS1L	0.000168109	0.363215	0.263368	0.0998462
cg15385589	NM_022114;NM_199454	PRDM16;PRDM16	0.00154733	0.450744	0.350944	0.0998004
cg24453118	NM_015116;NM_001164213;NM_001164211	LRCH1;LRCH1;LRCH1	0.00232791	0.245586	0.34537	-0.0997844
cg11576486	NM_024830	LPCAT1	0.00252088	0.832894	0.733119	0.0997747
cg08619515	NM_015226	CLEC16A	0.000925989	0.755485	0.855257	-0.0997716
cg18822703	NM_002086;NM_203506	GRB2;GRB2	0.00252088	0.723738	0.623972	0.0997661
cg14472551	NM_012194	C11orf41	0.00318837	0.477934	0.378177	0.0997575
cg15062470	NM_022823;NM_001486	FNDC4;GCKR	0.00232791	0.472233	0.571933	-0.0996999
cg20334115	NM_013328	PYCR2	0.00400884	0.45987	0.559553	-0.0996828
cg27573298			0.00154733	0.471697	0.372016	0.0996812
cg02650512	NM_000984;NR_000010;NR_000014	RPL23A;SNORD4A;SNORD42A	0.0082544	0.83976	0.740102	0.0996583
cg22708150	NM_025262	LY6G5C	0.000136777	0.606499	0.706155	-0.0996552
cg04885037	NM_001082575	HRNBP3	0.0029502	0.658909	0.75856	-0.0996501
cg21039708	NR_029385	OTX2OS1	0.000925989	0.216428	0.31606	-0.0996312
cg01375075			0.0082544	0.719386	0.619761	0.0996258
cg07933656			0.00252088	0.44979	0.549407	-0.0996172
cg08460732			0.000232965	0.67426	0.57465	0.0996107
cg08604960	NM_033274	ADAM19	5.00641e-06	0.735431	0.635839	0.099592
cg07235935	NM_022569	NDST4	0.000709274	0.568811	0.469229	0.0995825
cg19322065			0.00198112	0.442079	0.541659	-0.0995802
cg24517989	NM_021961	TEAD1	0.000925989	0.679478	0.779049	-0.0995702
cg09404516	NM_178313;NM_003128	SPTBN1;SPTBN1	0.00232791	0.26414	0.363678	-0.0995386
cg14676529	NM_031849;NM_018905;NM_031411;NM_031857;NM_018910;NM_018900;NM_018909;NM_031860;NM_018908;NM_018906;NM_018907;NM_031859;NM_018901;NM_018911	PCDHA6;PCDHA2;PCDHA1;PCDHA9;PCDHA7;PCDHA1;PCDHA6;PCDHA10;PCDHA5;PCDHA3;PCDHA4;PCDHA10;PCDHA10;PCDHA8	0.000491803	0.389565	0.489102	-0.0995363
cg01090433	NM_001257	CDH13	0.00884283	0.250479	0.150945	0.0995336
cg01185921	NM_001003407;NM_001003408	ABLIM1;ABLIM1	8.95659e-05	0.573167	0.672697	-0.0995291
cg15711508			0.00400884	0.655438	0.754963	-0.0995243
cg14673936	NM_001010903	C6orf222	0.000407605	0.717455	0.617932	0.0995228
cg12825070	NM_001040174;NM_001040171;NM_001040172;NM_001040173;NM_001040169;NM_001040174;NM_001040169;NM_000870;NM_000870;NM_001040172;NM_199453;NM_001040171;NM_199453;NM_001040173	HTR4;HTR4;HTR4;HTR4;HTR4;HTR4;HTR4;HTR4;HTR4;HTR4;HTR4;HTR4;HTR4;HTR4	0.00344351	0.258008	0.357505	-0.0994975
cg21402921	NM_001165037;NM_000810;NM_001165037	GABRA5;GABRA5;GABRA5	0.00142298	0.327757	0.427245	-0.0994876
cg16426215			0.00371664	0.417894	0.318407	0.099487
cg19649152			0.0029502	0.728597	0.828082	-0.0994857
cg15409712	NM_003998;NM_001165412	NFKB1;NFKB1	0.000110886	0.704125	0.604641	0.0994838
cg24541193	NM_006996	SLC19A2	0.00182573	0.549902	0.649351	-0.099449
cg09098522			6.45615e-05	0.413377	0.512809	-0.0994323
cg20651758			0.0029502	0.689663	0.789093	-0.0994293
cg00613284	NM_152765	C8orf46	0.0029502	0.399285	0.299857	0.0994282
cg13852084	NM_006120	HLA-DMA	0.000136777	0.602487	0.503073	0.0994135
cg08217285	NM_014030;NM_001085454	GIT1;GIT1	0.00371664	0.341274	0.241862	0.0994121
cg07803859	NM_001170765;NM_001170766	LCOR;LCOR	0.00377445	0.349152	0.249746	0.0994057
cg13702222	NM_207296;NM_207296;NM_021038;NM_207295;NM_207294;NM_207295;NM_207297;NM_207293;NM_207294;NM_207292;NM_207297;NM_207293	MBNL1;MBNL1;MBNL1;MBNL1;MBNL1;MBNL1;MBNL1;MBNL1;MBNL1;MBNL1;MBNL1;MBNL1	0.000407605	0.675473	0.576072	0.0994011
cg13651690			0.00344351	0.827164	0.727778	0.0993858
cg27332104			0.00113872	0.715545	0.814924	-0.0993781
cg12628061			0.00400884	0.315958	0.415331	-0.0993729
cg06029700	NM_001159575;NM_001038;NM_001159576	SCNN1A;SCNN1A;SCNN1A	0.00770052	0.351368	0.450737	-0.0993686
cg18601057	NM_000540;NM_001042723	RYR1;RYR1	0.00318837	0.659113	0.559745	0.099368
cg16258657	NM_001003792;NM_001003793;NM_014483	RBMS3;RBMS3;RBMS3	0.00501141	0.794896	0.695538	0.0993587
cg04411041	NM_001164379	FAM180B	5.77757e-05	0.528461	0.627813	-0.0993518
cg27012021			0.000591527	0.81559	0.716243	0.0993469
cg16407164			8.03836e-05	0.338258	0.437589	-0.0993313
cg24535918	NM_002867	RAB3B	0.00110202	0.317298	0.217967	0.0993304
cg00987918	NM_138700	TRIM40	0.00539169	0.543022	0.4437	0.0993217
cg02161292	NM_018917;NM_003735;NM_032092;NM_018914;NM_018921;NM_018912;NM_018922;NM_018926;NM_018924;NM_018927;NM_018919;NM_032088;NM_018913;NM_018918;NM_003736;NM_018916;NM_018915;NM_018923;NM_018920;NM_018925	PCDHGA4;PCDHGA12;PCDHGA11;PCDHGA11;PCDHGA9;PCDHGA1;PCDHGB1;PCDHGB6;PCDHGB3;PCDHGB7;PCDHGA6;PCDHGA8;PCDHGA10;PCDHGA5;PCDHGB4;PCDHGA3;PCDHGA2;PCDHGB2;PCDHGA7;PCDHGB5	0.0066896	0.649723	0.749039	-0.0993164
cg06500337			0.00400884	0.143706	0.24302	-0.0993141
cg23019565	NM_147193	GLIS1	0.00465502	0.757942	0.65863	0.0993111
cg08690094			0.00142298	0.596037	0.695336	-0.0992992
cg17156633	NM_005897;NM_001145349	IPP;IPP	0.000407605	0.741904	0.642624	0.0992793
cg15898840	NM_001013398;NM_001013398;NM_000598;NM_000598	IGFBP3;IGFBP3;IGFBP3;IGFBP3	0.000709274	0.0926606	0.191916	-0.0992555
cg09341793	NM_016150	ASB2	0.00198112	0.436577	0.53583	-0.099253
cg03161803			8.09421e-05	0.24606	0.345294	-0.0992341
cg00163549	NM_003782	B3GALT4	0.00252088	0.721461	0.622234	0.099227
cg10932939			0.0057972	0.754876	0.854099	-0.0992228
cg23018755	NM_002359;NM_032711	MAFG;MAFG	0.00120089	0.461004	0.560225	-0.0992204
cg18571640			0.00501141	0.435259	0.336053	0.0992061
cg22043168	NM_170731;NM_170732;NM_001143806;NM_001143807;NM_001143807;NM_001143805	BDNF;BDNF;BDNF;BDNF;BDNF;BDNF	4.6132e-05	0.266065	0.365245	-0.0991803
cg25557432	NM_080676	MACROD2	2.90545e-05	0.322714	0.421893	-0.0991785
cg07791468			0.0082544	0.718868	0.818043	-0.0991747
cg19350115			0.000305694	0.830718	0.731565	0.0991534
cg22035959	NM_005224	ARID3A	0.00272801	0.674914	0.575762	0.099152
cg22363368			0.00252088	0.576564	0.477412	0.0991514
cg18315831			0.00622935	0.811313	0.712182	0.0991302
cg17727597			0.000277283	0.647893	0.548772	0.0991204
cg24411972	NM_173572	C10orf93	0.00501141	0.637661	0.538547	0.0991137
cg19787448			0.00182573	0.551732	0.452633	0.0990992
cg18195500			0.00214826	0.522091	0.423001	0.0990899
cg04790887			0.00432125	0.811754	0.712692	0.0990615
cg17250929	NM_002962	S100A5	0.000123209	0.552516	0.651569	-0.0990535
cg03548415			0.00421442	0.402947	0.303903	0.0990442
cg05191919			0.00182573	0.390968	0.291929	0.0990388
cg26256901			0.00101044	0.452393	0.353363	0.0990293
cg20353489			0.00539169	0.624004	0.723028	-0.0990238
cg06644515	NR_002746;NR_002578;NR_003938;NR_003940;NR_003944;NR_003939	SNORD47;GAS5;SNORD81;SNORD80;SNORD78;SNORD79	0.00198112	0.641243	0.542222	0.0990216
cg05878630	NM_198527;NM_001039675	HDDC3;UNC45A	0.00501141	0.458932	0.359956	0.098976
cg08044927			0.00429917	0.580621	0.679583	-0.0989626
cg03339817	NM_032740	SFT2D3	8.95659e-05	0.758616	0.659663	0.0989533
cg23421166	NM_001130017	ART3	0.0066896	0.57843	0.479483	0.0989478
cg26544722			0.00272801	0.690463	0.59152	0.0989422
cg05259303			0.00539169	0.492125	0.393191	0.0989349
cg05118587	NM_001004341	ETV3L	0.00675479	0.586096	0.487183	0.0989126
cg06098530	NM_012330	MYST4	0.00252088	0.221378	0.320278	-0.0988999
cg05634879			0.000591527	0.740361	0.641461	0.0988992
cg14570389	NM_021183	RAP2C	0.0013077	0.285633	0.384517	-0.0988841
cg25461186	NM_014938	MLXIP	0.000591527	0.676029	0.774892	-0.0988627
cg04071967			0.0066896	0.687958	0.786812	-0.0988539
cg07606495	NM_024323	C19orf57	0.000709274	0.400523	0.499371	-0.0988483
cg13632655	NM_002847;NM_130842;NM_130843	PTPRN2;PTPRN2;PTPRN2	0.00110202	0.378393	0.279552	0.098841
cg14733637	NM_030782	CLPTM1L	0.00245962	0.669515	0.570677	0.0988382
cg08726863	NM_032740	SFT2D3	5.77757e-05	0.559326	0.460514	0.0988124
cg02171545	NM_022808;NM_022807;NM_022806	SNRPN;SNRPN;SNRPN	0.00539169	0.259263	0.358061	-0.0987977
cg02379079	NM_004139	LBP	0.00884283	0.49148	0.392686	0.0987939
cg26152983	NM_022149;NM_022149	MAGEF1;MAGEF1	0.00432125	0.437248	0.338456	0.0987924
cg01572694	NR_029608	MIR10A	4.6132e-05	0.598841	0.697625	-0.0987838
cg02116437	NM_001077194;NM_170699;NM_001077191	GPBAR1;GPBAR1;GPBAR1	0.0057972	0.540598	0.441837	0.0987609
cg01588592	NM_001004341;NM_001004341	ETV3L;ETV3L	0.000305694	0.674338	0.773093	-0.0987554
cg27103937			0.000277283	0.682263	0.781016	-0.0987531
cg04449562	NM_015025	MYT1L	0.000539576	0.682426	0.781162	-0.0987357
cg06299997	NM_000089	COL1A2	0.00717946	0.387764	0.28903	0.0987347
cg20993403	NM_177996	EPB41L1	0.0057972	0.373083	0.471816	-0.0987331
cg07007035	NM_001128636	ELFN1	0.00539169	0.580774	0.482045	0.0987299
cg26503038	NM_052847	GNG7	6.45615e-05	0.614593	0.515872	0.0987213
cg19776833	NM_032682	FOXP1	0.00198112	0.47007	0.568787	-0.0987171
cg00855901	NM_006820	IFI44L	0.000263838	0.146098	0.244805	-0.0987073
cg04178787			0.00120089	0.316306	0.415009	-0.0987023
cg23202388	NM_001142675;NM_001142675	CHID1;CHID1	0.00313792	0.697992	0.796694	-0.0987015
cg13496755			0.000847879	0.557009	0.655704	-0.0986952
cg16551520			0.00465502	0.77285	0.87153	-0.0986797
cg26878655	NM_001145301;NM_000964;NM_001145302	RARA;RARA;RARA	0.000925989	0.250831	0.152155	0.0986767
cg15714846	NM_003468	FZD5	0.00432125	0.371964	0.273357	0.0986076
cg06219806	NM_024060;NM_001620	AHNAK;AHNAK	0.00400884	0.358462	0.259882	0.0985798
cg21971799			0.00397788	0.507087	0.408527	0.0985597
cg10636246	NM_004833	AIM2	0.00104099	0.606463	0.507907	0.0985561
cg06708720	NM_178040;NR_027949;NR_027946;NR_027948;NM_178039	ERC1;ERC1;ERC1;ERC1;ERC1	0.0013077	0.402043	0.500592	-0.0985496
cg10259521			0.00252088	0.691213	0.592665	0.0985482
cg00863309	NM_016448	DTL	0.00432125	0.404946	0.503484	-0.0985377
cg16008966			0.00884283	0.516964	0.615498	-0.0985339
cg09248714	NM_005427	TP73	0.0057972	0.316918	0.41545	-0.0985326
cg01366985			0.000775778	0.206142	0.30467	-0.098528
cg24198004	NM_001850;NR_031662;NM_020351	COL8A1;MIR548G;COL8A1	0.00232791	0.626988	0.725515	-0.0985269
cg19273683	NM_001113348	ECE1	0.000709274	0.56259	0.464064	0.0985257
cg20164887	NM_001113755;NM_001113756;NM_001953;NM_001113756	TYMP;TYMP;TYMP;TYMP	0.00168136	0.456951	0.358437	0.0985142
cg13407335	NM_004732	KCNAB3	0.00214826	0.879519	0.781007	0.0985128
cg06872313			9.97036e-05	0.568315	0.666805	-0.0984904
cg14392677	NM_017617	NOTCH1	0.000227564	0.441121	0.342633	0.0984879
cg13022993	NM_019111	HLA-DRA	0.00318837	0.757425	0.658938	0.0984867
cg04436383	NM_197965;NM_197965	SLC10A6;SLC10A6	0.000775778	0.7853	0.686819	0.0984816
cg14679780	NM_015898	ZBTB7A	0.000591527	0.776617	0.678137	0.0984796
cg08923349	NM_012250;NM_001102669	RRAS2;RRAS2	0.000205893	0.764228	0.66578	0.0984483
cg08357012	NM_005766	FARP1	0.00198112	0.785616	0.687172	0.0984441
cg12690978	NM_003480	MFAP5	0.00717946	0.694761	0.596373	0.0983878
cg05928873	NM_173808	NEGR1	0.00318837	0.856946	0.758562	0.0983841
cg10184431	NM_021066;NM_003521;NM_003521	HIST1H2AJ;HIST1H2BM;HIST1H2BM	0.00101055	0.380635	0.282269	0.0983655
cg03829739	NR_029420	LOC650226	0.000168109	0.469946	0.568312	-0.0983653
cg06362313	NM_002046	GAPDH	0.00272801	0.36517	0.266813	0.0983569
cg06722407	NR_027248	LOC100101938	0.000922318	0.446358	0.544707	-0.098349
cg05800368	NM_001139442	TTLL11	0.00142298	0.730031	0.828376	-0.0983453
cg14145159	NM_001160036;NM_015178;NM_001160037	RHOBTB2;RHOBTB2;RHOBTB2	0.00120089	0.241349	0.143008	0.0983407
cg01898661	NR_027335;NR_027336	LOC100130015;LOC100130015	0.000775778	0.227595	0.325918	-0.0983228
cg01188753	NR_003605;NR_003606;NR_003030;NR_003604	C20orf199;C20orf199;SNORD12;C20orf199	0.00318837	0.739158	0.640838	0.0983192
cg04870470	NM_001439;NM_001033025	EXTL2;EXTL2	0.00182573	0.476136	0.574437	-0.0983006
cg24368031	NM_006039	MRC2	0.00203521	0.537037	0.438766	0.0982715
cg24803614	NM_002032	FTH1	0.0029502	0.504875	0.406605	0.0982704
cg21325723	NM_006781	C6orf10	0.00717946	0.682295	0.780543	-0.098248
cg25090051	NR_002785;NM_016592	GNASAS;GNAS	0.00168136	0.528047	0.626289	-0.098242
cg24733475	NM_001040275;NM_001040276	ESR2;ESR2	6.45615e-05	0.777975	0.876211	-0.0982359
cg02892624	NM_002963	S100A7	0.00252088	0.523214	0.424989	0.0982245
cg18855780	NM_181443	BTBD3	0.00142298	0.182132	0.280335	-0.0982034
cg05758467	NM_006037	HDAC4	0.000277283	0.698974	0.797172	-0.0981978
cg22122808	NM_001017916;NM_001915;NM_001017917	CYB561;CYB561;CYB561	0.00110202	0.372078	0.470261	-0.0981829
cg18467358			0.00515398	0.899944	0.801766	0.0981784
cg15142214			0.00214826	0.540227	0.638392	-0.0981644
cg14960373	NM_001849;NM_058174;NM_058175	COL6A2;COL6A2;COL6A2	0.00465502	0.608127	0.50997	0.0981567
cg27198931			0.000394252	0.292249	0.390398	-0.0981483
cg07752409	NM_175062	RASGEF1C	0.00501141	0.715195	0.813316	-0.098121
cg08250081			0.000227564	0.442239	0.540349	-0.0981105
cg11084611	NM_013310	C2orf27A	0.000251303	0.58023	0.678339	-0.0981088
cg01385679	NM_182764;NM_133171	ELMO2;ELMO2	0.000123209	0.617942	0.716041	-0.0980993
cg08865099	NM_001989	EVX1	0.000277283	0.440202	0.538297	-0.0980947
cg11820913	NM_001159531;NM_020836	BEGAIN;BEGAIN	0.00142298	0.812201	0.714134	0.0980673
cg25329685	NM_004901;NM_001128930	ENTPD4;ENTPD4	0.00344351	0.422048	0.323985	0.0980626
cg02323003			0.0082544	0.371343	0.273282	0.0980613
cg17853801	NR_024547;NM_003876	TMEM11;TMEM11	0.00272801	0.642559	0.544501	0.0980581
cg24749385			0.00432125	0.748358	0.846412	-0.0980537
cg23463608	NM_052847	GNG7	0.00432125	0.643228	0.545187	0.0980407
[truncated: 4,708 more rows]

## Sheet: CpG BL DiffMedian >10% p<0.01
targetID	geneCode	geneName	p values	median_LB patients	median_LB controls	diffMedian_LB patients to controls
cg05696877	NM_006820	IFI44L	0.000186125	0.19193	0.633779	-0.441849
cg09639108			0.00859181	0.534013	0.934506	-0.400494
cg12501287	NM_005539	INPP5A	0.00663553	0.560641	0.960031	-0.39939
cg14114910	NM_198469	MORN5	0.0066896	0.560745	0.953285	-0.39254
cg05552874	NM_001548	IFIT1	8.47324e-06	0.294863	0.684103	-0.38924
cg16866567	NM_021623	PLEKHA2	0.00530429	0.457565	0.0684451	0.38912
cg16564132			0.0029502	0.219294	0.562267	-0.342973
cg19585676	NM_002116	HLA-A	0.0082544	0.700715	0.359224	0.341491
cg04282082	NM_199160;NM_014368	LHX6;LHX6	0.0013077	0.566787	0.907969	-0.341182
cg03607951	NM_006820	IFI44L	3.26654e-05	0.277229	0.609284	-0.332055
cg13953972	NM_031453	FAM107B	0.00622935	0.530289	0.857657	-0.327369
cg14218851			0.00622935	0.339912	0.626725	-0.286813
cg14293575	NM_017414	USP18	0.000539576	0.309855	0.590538	-0.280683
cg27436995	NM_153350	FBXL16	0.00400884	0.6094	0.337396	0.272004
cg23564471	NM_001005388;NM_001160331;NM_015090;NM_001160332	NFASC;NFASC;NFASC;NFASC	0.00539169	0.659261	0.921084	-0.261823
cg00514723	NM_032221	CHD6	0.0013077	0.224208	0.472673	-0.248465
cg04922029	NM_001122951;NM_002036;NM_002036	DARC;DARC;DARC	0.0057972	0.39891	0.642105	-0.243195
cg19245335	NM_022115;NM_001040424	PRDM15;PRDM15	0.00318837	0.579056	0.820867	-0.241811
cg11693709	NM_020168;NM_001128628;NM_001128629	PAK6;PAK6;PAK6	0.00344351	0.268191	0.509442	-0.241251
cg25830305	NM_003282;NM_001145829	TNNI2;TNNI2	0.00344351	0.324272	0.0852975	0.238975
cg23233416			0.00203521	0.559299	0.796163	-0.236865
cg14102437	NM_001166264;NM_000627;NM_001166266;NM_001166264;NM_000627;NM_206943;NM_001166265;NM_001166266;NM_001166265	LTBP1;LTBP1;LTBP1;LTBP1;LTBP1;LTBP1;LTBP1;LTBP1;LTBP1	0.000251303	0.473046	0.709713	-0.236667
cg06981309	NM_021105	PLSCR1	0.000447907	0.161837	0.396358	-0.234521
cg06872964	NM_006820	IFI44L	0.000305694	0.261192	0.492911	-0.231718
cg27141807	NM_080862	SPSB4	0.00318837	0.872546	0.643605	0.228941
cg12733396	NM_001852	COL9A2	0.000336738	0.599516	0.377431	0.222086
cg22508930	NM_015646;NM_001010942	RAP1B;RAP1B	0.00717946	0.573183	0.356442	0.216741
cg02389040			0.00400884	0.404209	0.620121	-0.215912
cg16682903	NM_001105;NM_001111067	ACVR1;ACVR1	0.00432125	0.357797	0.572296	-0.214499
cg01361499			0.00465502	0.234646	0.449115	-0.214468
cg12903648	NM_031281	FCRL5	3.32831e-06	0.511766	0.299584	0.212182
cg24262870			0.0013077	0.195751	0.407717	-0.211966
cg16174106	NM_018194;NM_001170564;NM_001170580;NM_001170588;NM_001122834;NM_001170587	HHAT;HHAT;HHAT;HHAT;HHAT;HHAT	0.000407605	0.215392	0.426628	-0.211235
cg01974091	NM_206918	DEGS2	0.000407605	0.648929	0.439542	0.209386
cg04332442	NM_014246	CELSR1	0.000647979	0.232226	0.440954	-0.208728
cg16273546			0.000205893	0.552183	0.758472	-0.206289
cg13740929			0.000847879	0.619087	0.82427	-0.205183
cg14167415			0.00946756	0.537061	0.741655	-0.204594
cg21785750			0.00770052	0.643275	0.847624	-0.204349
cg13429555			0.00110202	0.261973	0.466014	-0.204041
cg18910313	NM_001040664;NM_002566	PPAN-P2RY11;P2RY11	0.00182573	0.396674	0.194064	0.20261
cg18076842	NM_020179	C11orf75	0.0013077	0.242353	0.444924	-0.202571
cg08570034	NM_006650	CPLX2	0.00318837	0.368306	0.5692	-0.200895
cg16301894			0.00371664	0.508386	0.706739	-0.198353
cg06318935			0.00946756	0.538239	0.735845	-0.197607
cg05857999			0.00946756	0.436603	0.633854	-0.19725
cg07455790			0.0057972	0.650981	0.847773	-0.196792
cg21211645	NM_015340	LARS2	5.77757e-05	0.415139	0.611589	-0.19645
cg01792601			0.00182573	0.32865	0.132355	0.196295
cg04597312	NM_002163	IRF8	0.000136777	0.520859	0.324774	0.196085
cg15611600	NM_018559;NM_012345	KIAA1704;NUFIP1	0.00717946	0.22437	0.0283973	0.195973
cg04936619	NM_022344	C17orf75	0.00663553	0.307339	0.502991	-0.195651
cg25769566			0.000925989	0.711584	0.907081	-0.195497
cg00050618	NM_181079;NM_181078	IL21R;IL21R	0.000491803	0.429794	0.234409	0.195384
cg02304584			0.0029502	0.386865	0.582147	-0.195283
cg22169990	NM_001042535;NM_031946	AGAP3;AGAP3	0.00182573	0.238807	0.434004	-0.195198
cg10170847			0.00182573	0.487278	0.292463	0.194816
cg12271419	NM_001160036;NM_015178;NM_001160037	RHOBTB2;RHOBTB2;RHOBTB2	0.000491803	0.368901	0.174204	0.194698
cg23985447	NM_001077654;NM_014350	TNFAIP8;TNFAIP8	8.03836e-05	0.443965	0.249268	0.194697
cg10696677	NM_001167827;NM_007162	TFEB;TFEB	0.00272801	0.502023	0.308332	0.193691
cg16704590	NR_003605;NR_003606;NR_003695;NR_003030;NR_031660;NR_003604	C20orf199;C20orf199;SNORD12B;SNORD12;MIR1259;C20orf199	0.000336738	0.472843	0.279537	0.193305
cg18264486			0.00770052	0.433777	0.626804	-0.193027
cg13738155			0.00296513	0.262279	0.454727	-0.192447
cg01099825	NM_015456	COBRA1	0.00371664	0.292666	0.484399	-0.191733
cg07368857	NM_032682;NM_001012505	FOXP1;FOXP1	0.000407605	0.619154	0.42814	0.191014
cg18182216	NM_018379;NM_001163259;NM_001163258;NM_001163260;NM_001040217	FAM63A;FAM63A;FAM63A;FAM63A;FAM63A	7.2074e-05	0.384831	0.574825	-0.189993
cg18281939	NM_005779	LHFPL2	0.000647979	0.227064	0.416566	-0.189502
cg13571460	NM_199160;NM_014368	LHX6;LHX6	0.00539169	0.726317	0.915475	-0.189158
cg11702988	NM_015205;NM_032189	ATP11A;ATP11A	0.00946756	0.371388	0.182527	0.188861
cg02997796	NM_014488	RAB30	0.000277283	0.634386	0.446469	0.187918
cg00480856	NM_003941	WASL	0.000647979	0.530264	0.717983	-0.18772
cg01178099			0.00344351	0.291701	0.479226	-0.187524
cg06315208	NM_014641	MDC1	0.000792279	0.652242	0.465981	0.186261
cg10929921	NM_003506;NM_001164615;NM_001164616	FZD6;FZD6;FZD6	5.77757e-05	0.412654	0.598413	-0.185759
cg03909983			9.97036e-05	0.397898	0.582744	-0.184846
cg22514722	NM_007283;NM_001003794	MGLL;MGLL	0.00101055	0.648029	0.463939	0.18409
cg13886799	NM_001001891;NM_001001666;NM_001001666;NM_001001891	ANO7;ANO7;ANO7;ANO7	0.00344725	0.553288	0.37013	0.183158
cg05542681	NM_153350	FBXL16	0.00656681	0.276772	0.0941461	0.182626
cg21983531	NM_001163636;NM_032999;NM_033000;NM_033001;NM_001518	GTF2I;GTF2I;GTF2I;GTF2I;GTF2I	0.00132378	0.495808	0.313678	0.18213
cg13708645	NM_032590;NM_001005366	KDM2B;KDM2B	0.00182573	0.402733	0.220865	0.181868
cg01050273			2.29128e-05	0.487367	0.305663	0.181704
cg06394109			0.00820381	0.814108	0.634581	0.179527
cg15411840	NR_028595	CCDC162	0.00272801	0.311124	0.489956	-0.178832
cg26168224			6.45615e-05	0.648993	0.827652	-0.178659
cg16075649	NR_024433	LOC283663	0.000136777	0.49711	0.320606	0.176504
cg08861456	NM_175911	OR2L13	0.00214826	0.493734	0.317352	0.176382
cg21158528	NM_004619;NM_001033910	TRAF5;TRAF5	7.2074e-05	0.525228	0.34914	0.176087
cg07460842			0.00622935	0.212206	0.0369217	0.175284
cg26960322	NM_020311	CXCR7	0.000251303	0.622714	0.447739	0.174975
cg05856321			0.00120089	0.411835	0.237106	0.174729
cg25330422	NM_213662;NM_139276;NM_003150	STAT3;STAT3;STAT3	0.0029502	0.437067	0.262904	0.174163
cg13918228	NR_026671;NR_026672;NM_001781	CD69;CD69;CD69	0.000591527	0.24738	0.42147	-0.17409
cg23983453	NM_005654	NR2F1	0.00946756	0.204187	0.378179	-0.173992
cg21477985	NM_016584	IL23A	0.000626927	0.488044	0.314109	0.173935
cg10549986	NM_080657	RSAD2	2.90545e-05	0.287247	0.46097	-0.173724
cg02957270	NM_001075099;NM_003726	SKAP1;SKAP1	5.77757e-05	0.625326	0.798602	-0.173276
cg03626672	NM_020311	CXCR7	0.00318837	0.567571	0.394865	0.172706
cg16281534	NM_006317	BASP1	0.000336738	0.606639	0.434	0.172639
cg20006618	NM_003603;NM_021069;NM_001145670;NM_001145671;NM_001145672;NM_001145673	SORBS2;SORBS2;SORBS2;SORBS2;SORBS2;SORBS2	0.000251303	0.515259	0.342809	0.172449
cg14398557	NM_178578	PSMF1	0.00622935	0.510525	0.338646	0.171878
cg25585279			0.000370631	0.401152	0.229464	0.171688
cg08779649			0.00770052	0.515521	0.344289	0.171231
cg02303805	NM_004456;NM_152998	EZH2;EZH2	0.000305694	0.365755	0.195173	0.170582
cg02956248	NM_005155;NM_030651;NM_138717	PPT2;PRRT1;PPT2	0.000591527	0.667925	0.498348	0.169577
cg06313775	NM_001145317;NM_024918;NM_001145316;NM_001145318;NM_001145315	DSN1;DSN1;DSN1;DSN1;DSN1	0.0082544	0.611659	0.442206	0.169453
cg02394698	NM_001025616	ARHGAP24	0.000227564	0.300568	0.132209	0.168359
cg24995347	NM_001005176;NM_007237	SP140;SP140	0.000407605	0.630289	0.462163	0.168126
cg05649077			0.000258613	0.453193	0.620932	-0.167739
cg01859460	NM_004152	OAZ1	0.00232791	0.792289	0.625037	0.167252
cg16653991	NM_001144914;NM_001144915;NM_022970;NM_001144913;NM_001144916;NM_000141;NM_001144917;NM_001144919;NM_001144918	FGFR2;FGFR2;FGFR2;FGFR2;FGFR2;FGFR2;FGFR2;FGFR2;FGFR2	0.00400884	0.582467	0.749475	-0.167007
cg25988214	NM_001037984;NM_138570	SLC38A10;SLC38A10	0.000847879	0.46703	0.300081	0.166949
cg08428292			6.66743e-07	0.394247	0.227792	0.166455
cg23828876	NM_005017	PCYT1A	0.0066896	0.503449	0.337113	0.166336
cg13832372	NM_199160;NM_014368	LHX6;LHX6	0.000251303	0.374078	0.207754	0.166324
cg04012282	NM_001013650	PRR23B	0.00884283	0.637728	0.803897	-0.166169
cg09125779	NM_139212;NM_001145460;NM_032495	HOPX;HOPX;HOPX	0.0066896	0.546629	0.380545	0.166084
cg22324981	NM_006162;NM_172388;NM_172389;NM_172387	NFATC1;NFATC1;NFATC1;NFATC1	7.77731e-07	0.376664	0.210708	0.165957
cg15278374	NM_198827	GPR133	0.0029502	0.754211	0.588742	0.165469
cg03776082			0.00432125	0.323176	0.488593	-0.165417
cg27019717	NM_053064	GNG2	0.000847879	0.382614	0.547252	-0.164638
cg24118856	NM_001040664;NM_002566	PPAN-P2RY11;P2RY11	0.00122675	0.623225	0.458912	0.164313
cg16960758	NM_001171631;NM_052946;NM_001171632;NM_001039724	NOSTRIN;NOSTRIN;NOSTRIN;NOSTRIN	0.000847879	0.384073	0.548321	-0.164248
cg27317694	NM_001268	RCBTB2	0.00214826	0.643574	0.47933	0.164245
cg01860774	NM_006977	ZBTB25	0.00371664	0.417976	0.254088	0.163887
cg04168675	NM_014689	DOCK10	0.00110857	0.735616	0.571832	0.163784
cg06538345	NR_026712;NR_000020;NR_000018;NR_000019;NM_012423;NR_000021	RPL13AP5;SNORD33;SNORD35A;SNORD34;RPL13A;SNORD32A	0.000591527	0.705543	0.541821	0.163722
cg18831134	NM_001159746	ABR	0.000336738	0.633816	0.470242	0.163574
cg26047334	NM_022648	TNS1	0.00214826	0.383294	0.21982	0.163474
cg16519742	NM_001146326;NM_001146327;NM_015363	ZIM2;ZIM2;ZIM2	0.00622935	0.645636	0.808952	-0.163316
cg01815690	NM_001099743;NM_001099751;NM_001099752;NM_001099754;NM_001099753;NM_001099744;NM_001099748;NM_001099746;NM_001099747;NM_017786;NM_001099745;NM_001099756;NM_001099755;NM_001099749;NM_001099750	GOLSYN;GOLSYN;GOLSYN;GOLSYN;GOLSYN;GOLSYN;GOLSYN;GOLSYN;GOLSYN;GOLSYN;GOLSYN;GOLSYN;GOLSYN;GOLSYN;GOLSYN	0.00120089	0.591148	0.428381	0.162767
cg03678039	NM_134268	CYGB	0.00154733	0.72772	0.565193	0.162528
cg19956889	NM_014688	USP6NL	0.00221305	0.588791	0.426446	0.162345
cg21648069	NM_178039;NR_027948;NR_027949;NM_178040;NR_027946	ERC1;ERC1;ERC1;ERC1;ERC1	0.0066896	0.413524	0.575811	-0.162287
cg05720871	NM_001099743;NM_001099751;NM_001099752;NM_001099754;NM_001099753;NM_001099744;NM_001099748;NM_001099746;NM_001099747;NM_017786;NM_001099745;NM_001099756;NM_001099755;NM_001099749;NM_001099750	GOLSYN;GOLSYN;GOLSYN;GOLSYN;GOLSYN;GOLSYN;GOLSYN;GOLSYN;GOLSYN;GOLSYN;GOLSYN;GOLSYN;GOLSYN;GOLSYN;GOLSYN	0.000647979	0.408823	0.246974	0.161849
cg25545500	NM_001002907	OR8K1	0.00101055	0.545497	0.383681	0.161816
cg23216724	NM_005299	GPR31	0.00120089	0.554118	0.392958	0.16116
cg25654695	NM_004152	OAZ1	0.00246675	0.708783	0.547692	0.161091
cg23035449	NM_198526	ZNF710	0.000136777	0.580587	0.741526	-0.160938
cg23895722	NM_145013;NM_000890	C11orf45;KCNJ5	0.000539576	0.416278	0.577163	-0.160885
cg19634573	NM_014661	FAM53B	0.000539576	0.443814	0.604597	-0.160783
cg14703454	NM_007072	HHLA2	0.0029502	0.42339	0.584088	-0.160698
cg15206834	NM_031438	NUDT12	0.00318837	0.258561	0.419254	-0.160693
cg05688618	NM_001025616;NM_001042669;NM_001042669	ARHGAP24;ARHGAP24;ARHGAP24	0.00110857	0.354034	0.193725	0.160309
cg27583922	NM_145057	CDC42EP5	0.00120089	0.548201	0.387993	0.160208
cg00464046	NR_024185;NR_024186;NM_024033	C7orf49;C7orf49;C7orf49	0.00371664	0.483995	0.323816	0.160179
cg00925492			3.81861e-06	0.539926	0.699424	-0.159498
cg25953417	NM_178014	TUBB	0.000370631	0.475695	0.316361	0.159334
cg27046335	NM_000949	PRLR	0.000336738	0.468275	0.627458	-0.159184
cg13844463	NM_004171	SLC1A2	0.000123209	0.381992	0.223288	0.158704
cg15947697	NR_026816	PSORS1C3	0.00232791	0.364571	0.206026	0.158545
cg24956391	NM_198291;NM_005417	SRC;SRC	2.89698e-06	0.788524	0.630002	0.158522
cg04370983	NM_006265	RAD21	0.00455336	0.35293	0.194479	0.158451
cg00540464			0.00120089	0.606439	0.448464	0.157975
cg08090385			0.00101055	0.902823	0.74492	0.157903
cg23948811			0.000336738	0.612036	0.454337	0.157699
cg14040931	NM_005476;NM_001128227	GNE;GNE	0.00377445	0.713947	0.556377	0.15757
cg26020695	NM_198849	SIAH3	0.00110202	0.690309	0.847805	-0.157496
cg11423096	NM_016290	UIMC1	0.00101353	0.449173	0.291736	0.157437
cg23304647	NM_007353	GNA12	0.00272801	0.359177	0.516372	-0.157195
cg00110545			0.000925989	0.532691	0.375562	0.157129
cg19861842	NM_001160036;NM_015178;NM_001160037	RHOBTB2;RHOBTB2;RHOBTB2	0.00717946	0.355055	0.197972	0.157083
cg14325436	NM_024527	ABHD8	0.000539576	0.73433	0.577374	0.156956
cg02450064	NM_024119	DHX58	2.03143e-05	0.294785	0.138288	0.156498
cg21787323	NM_018480;NM_001142699	TMEM126B;DLG2	0.00432125	0.388263	0.54454	-0.156278
cg08832695	NR_033203;NR_033205;NR_033204;NR_033201;NM_018952;NR_033202	LOC404266;LOC404266;LOC404266;LOC404266;HOXB6;LOC404266	0.000223716	0.376639	0.532896	-0.156257
cg22809047	NM_001099693;NM_000993;NM_001098577	RPL31;RPL31;RPL31	0.00214826	0.652491	0.808703	-0.156212
cg27395654	NM_004198	CHRNA6	0.000434933	0.399962	0.243859	0.156103
cg02787852	NM_181079;NM_181078;NM_181079	IL21R;IL21R;IL21R	0.000539576	0.47792	0.322043	0.155877
cg05365532	NM_006669	LILRB1	0.000491803	0.448075	0.292565	0.15551
cg01787084	NR_024568;NM_024735	FBXO31;FBXO31	0.000336738	0.212805	0.368144	-0.155339
cg12076931	NM_017617	NOTCH1	0.000447907	0.333177	0.488479	-0.155302
cg17934470			0.000925989	0.377873	0.533027	-0.155154
cg00428382			2.03143e-05	0.677477	0.832387	-0.154911
cg13282971	NM_024060;NM_001620	AHNAK;AHNAK	0.00770052	0.573101	0.418283	0.154818
cg22575379	NR_027766;NR_002949	NUDT16P;NUDT16P	0.000110886	0.325015	0.479704	-0.154689
cg20005518	NM_018042;NM_018042	SLFN12;SLFN12	0.00371664	0.35099	0.196436	0.154553
cg07218880	NM_080687;NM_023011	UPF3A;UPF3A	0.00717946	0.459423	0.304912	0.154511
cg01940297	NR_031612;NR_003367	MIR1207;PVT1	0.00339846	0.614689	0.460197	0.154492
cg01965673			0.000305694	0.572164	0.418217	0.153946
cg17990365	NM_021034	IFITM3	0.000227564	0.64004	0.793929	-0.153889
cg03649060	NM_032377	ELOF1	0.00318837	0.42372	0.26984	0.15388
cg22052056	NM_175849;NM_006892;NM_175848	DNMT3B;DNMT3B;DNMT3B	0.000491803	0.512809	0.666611	-0.153803
cg00022997			0.00465502	0.629134	0.782801	-0.153668
cg14255337	NM_032590;NM_001005366	KDM2B;KDM2B	0.00214826	0.409624	0.25626	0.153364
cg21794222	NM_004367;NM_031409	CCR6;CCR6	0.00371664	0.349215	0.195899	0.153317
cg02048922	NM_001702	BAI1	0.00714027	0.6509	0.497674	0.153226
cg19951006	NM_016584	IL23A	5.77757e-05	0.347713	0.1945	0.153213
cg20334079	NM_148957	TNFRSF19	0.00198112	0.467406	0.620533	-0.153127
cg11003133	NM_004833	AIM2	0.00110202	0.527696	0.374579	0.153118
cg13200575			0.00539169	0.254425	0.40753	-0.153106
cg00394261	NM_000163	GHR	8.03836e-05	0.581276	0.428228	0.153048
cg18567954	NM_004416	DTX1	3.26654e-05	0.682466	0.529756	0.152709
cg01876338	NM_006794;NM_001164165;NM_006794	GPR75;LOC100302652;GPR75	0.00120089	0.709214	0.861895	-0.15268
cg25947970			0.000925989	0.44999	0.602532	-0.152542
cg05496603	NM_001137560	TMEM151B	0.0029502	0.712199	0.864492	-0.152294
cg14778922	NM_014228	SLC6A7	0.00717946	0.578012	0.425758	0.152254
cg19666600	NM_001164372;NM_013300	GPN3;C12orf24	0.00829162	0.691985	0.539804	0.152181
cg24757755	NR_003531;NR_003530;NR_002766	MEG3;MEG3;MEG3	0.000370631	0.570684	0.418742	0.151942
cg18963065	NM_203281;NM_001721	BMX;BMX	9.97036e-05	0.512531	0.664233	-0.151703
cg10372770			0.0057972	0.706006	0.857641	-0.151635
cg13095698	NM_001012980;NM_001163541	SATL1;SATL1	0.0066896	0.719803	0.871232	-0.151428
cg10426581	NM_001128852;NM_015908;NM_001128854;NM_001128853	SRRT;SRRT;SRRT;SRRT	8.03836e-05	0.381393	0.230075	0.151318
cg16555533	NM_031849;NM_018905;NM_031411;NM_031857;NM_018910;NM_018900;NM_018909;NM_018908;NM_018901;NM_018906;NM_018907;NM_031860;NM_018911	PCDHA6;PCDHA2;PCDHA1;PCDHA9;PCDHA7;PCDHA1;PCDHA6;PCDHA5;PCDHA10;PCDHA3;PCDHA4;PCDHA10;PCDHA8	0.00252088	0.721077	0.872373	-0.151296
cg01664151	NM_015082	FSTL4	0.00232791	0.645005	0.493792	0.151213
cg14115756	NM_005294;NM_012197	GPR21;RABGAP1	0.00232791	0.289969	0.441167	-0.151198
cg15555017	NM_001143820	ETS1	0.00120089	0.515272	0.666469	-0.151196
cg15907473	NM_180989	GPR180	0.00110857	0.67664	0.827812	-0.151172
cg09277575	NM_005989	AKR1D1	8.03836e-05	0.353712	0.202739	0.150973
cg14847626	NM_006312;NM_001077261	NCOR2;NCOR2	0.000232965	0.643527	0.492603	0.150924
cg08946713	NM_139266;NM_007315	STAT1;STAT1	0.0057972	0.32661	0.4775	-0.15089
cg09122035			0.00120089	0.483588	0.63403	-0.150441
cg04341806	NM_002298	LCP1	0.000227564	0.387221	0.237055	0.150166
cg02522485	NM_001165928;NM_004393	DAG1;DAG1	0.00432125	0.227402	0.377564	-0.150162
cg02419321	NM_002205	ITGA5	0.00318837	0.201211	0.351349	-0.150139
cg14353508	NM_003116	SPAG4	0.00142298	0.535504	0.385443	0.15006
cg26253663			0.000227564	0.320006	0.469993	-0.149987
cg22327338	NM_003550;NM_001013837;NM_001013836	MAD1L1;MAD1L1;MAD1L1	0.00252088	0.390055	0.240215	0.14984
cg25614875	NM_206594;NM_206595;NM_001134285	ESRRG;ESRRG;ESRRG	0.000539576	0.661085	0.810608	-0.149523
cg26589669	NM_183239	GSTO2	0.00232791	0.502351	0.353367	0.148984
cg06893362	NR_003605;NR_003606;NR_003030;NR_003604	C20orf199;C20orf199;SNORD12;C20orf199	0.000925989	0.548141	0.399164	0.148976
cg11724461	NM_147152;NM_019595;NM_006277	ITSN2;ITSN2;ITSN2	0.0013077	0.609154	0.46028	0.148874
cg08792630	NM_001455;NM_201559	FOXO3;FOXO3	0.00142298	0.333162	0.481932	-0.148771
cg10575219	NM_020725;NM_138495	ATXN7L1;ATXN7L1	0.00120089	0.277733	0.426453	-0.14872
cg13461447			0.00142298	0.384537	0.235843	0.148694
cg21887193	NM_001042535;NM_031946	AGAP3;AGAP3	0.00491617	0.184867	0.333556	-0.148689
cg17980508	NM_006820	IFI44L	0.000168109	0.244294	0.392963	-0.148669
cg09633240			8.03836e-05	0.586568	0.4382	0.148367
cg07277549	NM_006092	NOD1	0.000151703	0.449397	0.597726	-0.148329
cg11884933	NM_007353	GNA12	0.00101055	0.273717	0.421872	-0.148156
cg22450991			0.00246929	0.575458	0.427384	0.148074
cg18123677	NM_005025;NM_001122752	SERPINI1;SERPINI1	0.00272801	0.316516	0.464329	-0.147814
cg01028142	NM_207315	CMPK2	1.5915e-05	0.741182	0.88894	-0.147757
cg18595258	NR_028473;NM_153611;NM_001161454;NM_016464	TMEM138;CYBASC3;CYBASC3;TMEM138	0.0029502	0.385877	0.238153	0.147724
cg09152866	NM_032744;NM_001143948	C6orf105;C6orf105	0.00110202	0.413194	0.265558	0.147636
cg00898157			0.00357103	0.34242	0.489961	-0.147542
cg16332065	NM_173536	GABRG1	0.00540516	0.510287	0.657571	-0.147284
cg08726900	NM_013275	ANKRD11	0.00706309	0.213567	0.360697	-0.14713
cg03271761	NM_147182;NM_001035003;NM_001035003	KCNIP4;KCNIP4;KCNIP4	0.00168136	0.439552	0.586665	-0.147112
cg22825261	NM_172131;NM_172005;NM_172006	WFDC10B;WFDC13;WFDC10B	5.16524e-05	0.296197	0.149212	0.146985
cg07268332	NM_001025389;NM_001025390;NM_000480	AMPD3;AMPD3;AMPD3	0.00154733	0.583945	0.437013	0.146932
cg07855456	NM_031451	TEX101	0.00622935	0.703999	0.850917	-0.146918
cg08175413	NM_005575;NM_175920;NM_175920	LNPEP;LNPEP;LNPEP	0.00168136	0.451043	0.304471	0.146572
cg10149533			6.45615e-05	0.476095	0.622507	-0.146412
cg24367957			3.33649e-06	0.688917	0.542621	0.146296
cg05768044	NM_025134	CHD9	0.000591527	0.293614	0.439901	-0.146287
cg19438750	NM_001167580;NM_014848	SV2B;SV2B	0.000205893	0.536866	0.390583	0.146283
cg00767496	NR_033252;NM_001482	LOC145663;GATM	0.000491803	0.410073	0.263992	0.146082
cg09729012			0.00770052	0.411507	0.557557	-0.14605
cg01324550	NR_033203;NR_033205;NR_033204;NR_033201;NM_018952;NR_033202	LOC404266;LOC404266;LOC404266;LOC404266;HOXB6;LOC404266	0.0029502	0.31287	0.458837	-0.145967
cg24919348	NR_030329;NM_017890;NM_152564;NR_030596	MIR599;VPS13B;VPS13B;MIR875	0.000775778	0.321746	0.46762	-0.145874
cg16659497			0.00232791	0.649744	0.795593	-0.145849
cg08899523	NM_001144914;NM_001144915;NM_022970;NM_001144913;NM_001144916;NM_000141;NM_001144917;NM_001144919;NM_001144918	FGFR2;FGFR2;FGFR2;FGFR2;FGFR2;FGFR2;FGFR2;FGFR2;FGFR2	0.00272801	0.631431	0.777266	-0.145835
cg13388731	NM_001039550;NM_006736	DNAJB2;DNAJB2	0.000775778	0.4439	0.298074	0.145826
cg27295342			0.000647979	0.318382	0.463928	-0.145546
cg19402236	NM_001159920;NM_001160030;NM_002019;NM_001160031	FLT1;FLT1;FLT1;FLT1	0.000136777	0.335098	0.480606	-0.145508
cg06567596	NM_014916	LMTK2	0.000775778	0.59183	0.446348	0.145482
cg05481257	NM_182828	GDF7	0.0066896	0.474294	0.619697	-0.145403
cg02351362	NR_027463	SHBG	0.0082544	0.618751	0.764088	-0.145337
cg12288551	NM_001001555;NM_005311;NM_001001549	GRB10;GRB10;GRB10	0.00344351	0.603123	0.457865	0.145257
cg00726046	NM_007066;NM_181805;NM_181804	PKIG;PKIG;PKIG	0.000277283	0.561682	0.706912	-0.145231
cg15723874	NM_005920	MEF2D	0.00232791	0.335929	0.19074	0.145189
cg08450021			0.0029502	0.397004	0.251922	0.145083
cg24375364	NM_133463	AMZ1	0.000647979	0.306242	0.451253	-0.145011
cg23330450			0.00318837	0.415638	0.270668	0.144969
cg05280336	NM_004610	TCP10	0.00622935	0.615049	0.759899	-0.14485
cg22764289	NM_017786;NM_001099755;NM_001099745;NM_001099748;NM_001099744;NM_001099753;NM_001099746;NM_001099747;NM_001099756;NM_001099752;NM_001099750;NM_001099749;NM_001099754;NM_001099751;NM_001099743	GOLSYN;GOLSYN;GOLSYN;GOLSYN;GOLSYN;GOLSYN;GOLSYN;GOLSYN;GOLSYN;GOLSYN;GOLSYN;GOLSYN;GOLSYN;GOLSYN;GOLSYN	0.000227564	0.808727	0.664015	0.144713
cg13749113			0.00320937	0.609839	0.754471	-0.144633
cg05279387	NM_144704;NM_001018060;NR_027464;NM_001146288	AIFM3;AIFM3;AIFM3;AIFM3	0.000591527	0.585905	0.441369	0.144537
cg01367992	NM_001033667;NM_002348	LY9;LY9	0.000251303	0.628592	0.4841	0.144492
cg11498582	NM_014641	MDC1	0.00132378	0.731626	0.587149	0.144478
cg18403080			0.000925989	0.505129	0.649359	-0.144231
cg07700233			0.00101055	0.290886	0.434868	-0.143982
cg10403394	NM_001018007;NM_001018020;NM_001018004;NM_001018005;NM_000366;NM_001018008;NM_001018006	TPM1;TPM1;TPM1;TPM1;TPM1;TPM1;TPM1	2.18556e-06	0.461359	0.605281	-0.143923
cg22221831	NM_000900	MGP	0.000925989	0.591251	0.735051	-0.1438
cg25983544	NM_144662;NM_001025097;NM_001025096	PSMA8;PSMA8;PSMA8	0.000591527	0.697564	0.841355	-0.143791
cg23001905			0.00272801	0.49227	0.348558	0.143712
cg18081818			0.000370631	0.70238	0.846018	-0.143638
cg14409029	NM_001001483;NM_019028	ZDHHC13;ZDHHC13	0.00501141	0.42234	0.278878	0.143462
cg19127638	NM_030625	TET1	6.45615e-05	0.701541	0.844675	-0.143134
cg25150953	NM_014988;NM_001112718;NM_001112717	LIMCH1;LIMCH1;LIMCH1	0.000123209	0.232084	0.375178	-0.143094
cg08707963	NM_007368	RASA3	0.004681	0.841102	0.6981	0.143002
cg05254518	NM_144767;NM_007200;NM_006738	AKAP13;AKAP13;AKAP13	0.00198112	0.390001	0.247089	0.142912
cg14273027	NM_020866;NR_002717	KLHL1;ATXN8OS	0.000647979	0.359177	0.501981	-0.142805
cg22747380	NM_000127	EXT1	1.79907e-05	0.386041	0.52874	-0.142699
cg17831117			0.000370631	0.550992	0.693499	-0.142507
cg09709457	NM_152531	C3orf21	0.000847879	0.256722	0.399218	-0.142497
cg06157561	NM_001163264;NM_001163264	PCYT1B;PCYT1B	0.00110202	0.736296	0.878767	-0.142471
cg15320998	NM_012256	ZNF212	0.00432125	0.442446	0.300034	0.142412
cg26450717			0.00884283	0.305763	0.44813	-0.142367
cg19071879	NM_001025108;NM_002285	AFF3;AFF3	0.00110202	0.78524	0.642874	0.142366
cg19739906	NM_001024075;NM_001024074;NM_006895	HNMT;HNMT;HNMT	2.29128e-05	0.524079	0.666372	-0.142293
cg12816198	NM_001098630;NM_032643;NM_001098629;NM_001098628;NM_001098631;NM_002200	IRF5;IRF5;IRF5;IRF5;IRF5;IRF5	0.00232791	0.545017	0.402742	0.142276
cg04247928			0.000647979	0.78524	0.643009	0.142231
cg08736883			0.00214826	0.560839	0.418842	0.141997
cg26573382	NM_001037132;NM_005010	NRCAM;NRCAM	0.000647979	0.439192	0.297267	0.141924
cg03730314			0.000193354	0.566264	0.424387	0.141877
cg16777090	NM_022094	CIDEC	0.00245962	0.560325	0.418524	0.141801
cg17460183	NM_153034	ZNF488	0.00400884	0.481322	0.339571	0.141751
cg13100118	NM_004930	CAPZB	0.000168109	0.392033	0.250364	0.141668
cg10177030	NR_003605;NR_003606;NR_003030;NR_003604	C20orf199;C20orf199;SNORD12;C20orf199	0.000647979	0.663795	0.522141	0.141655
cg12646029	NM_030883	OR2H1	0.00622935	0.534366	0.392838	0.141528
cg25290779			0.00182573	0.508729	0.367471	0.141257
cg11475300	NM_001830	CLCN4	0.00168136	0.661294	0.802525	-0.141231
cg07431973	NM_152330;NM_001042481	FRMD6;FRMD6	0.00371664	0.637895	0.496842	0.141052
cg24168221	NM_001008693	CST9	0.000277283	0.402732	0.261805	0.140928
cg13581527			0.000186125	0.300829	0.159918	0.14091
cg08608952	NM_001039802;NM_001791;NM_044472	CDC42;CDC42;CDC42	0.000186125	0.401403	0.2605	0.140903
cg08003321	NM_001142633;NM_014308	PIK3R5;PIK3R5	0.000775778	0.368685	0.227797	0.140888
cg25582669	NM_014305	TGDS	0.0016919	0.3824	0.241534	0.140866
cg12590535			0.00622935	0.56075	0.419889	0.140861
cg23003085	NM_012094;NM_181652;NM_016404;NM_181651	PRDX5;PRDX5;TRMT112;PRDX5	0.000539576	0.442798	0.301993	0.140805
cg22022379	NM_001145809;NM_001077186;NM_024729	MYH14;MYH14;MYH14	0.000168109	0.336433	0.195643	0.140789
cg18960324			0.00101055	0.282283	0.42302	-0.140737
cg04080448	NR_024037	RMST	0.0029502	0.486495	0.627166	-0.14067
cg16240368	NM_206996	SPAG17	0.000227564	0.377947	0.518378	-0.14043
cg21878650	NM_197941	ADAMTS6	0.00344351	0.320306	0.460592	-0.140286
cg21855816	NM_001134395;NM_032350;NM_001134396	C7orf50;C7orf50;C7orf50	0.00272801	0.563027	0.703291	-0.140264
cg05780543	NM_001142466;NM_133443	GPT2;GPT2	1.24118e-05	0.361055	0.220798	0.140257
cg06460587			0.00884283	0.46085	0.601097	-0.140247
cg18075666	NM_033157;NM_004342;NM_033138	CALD1;CALD1;CALD1	0.000775778	0.612914	0.472704	0.140209
cg08039084	NR_031680	MIR548H4	0.00120089	0.803758	0.663551	0.140207
cg03889700	NM_001119;NM_014190;NM_014189;NM_176801	ADD1;ADD1;ADD1;ADD1	0.00770052	0.49832	0.638526	-0.140206
cg26562772	NM_144728;NM_007207;NM_144729	DUSP10;DUSP10;DUSP10	0.00182573	0.270676	0.410725	-0.140049
cg03201337			0.000186125	0.730705	0.590893	0.139812
cg00374717	NM_014960	ARSG	0.00400884	0.493796	0.633592	-0.139796
cg01357222			0.000251303	0.661512	0.801198	-0.139686
cg14137381	NM_004174	SLC9A3	0.00432125	0.444077	0.304412	0.139665
cg02058408			0.00240465	0.540727	0.401082	0.139645
cg15134506	NM_152586	USP54	0.00154733	0.628441	0.488808	0.139633
cg23950233	NM_003782	B3GALT4	0.000925989	0.375492	0.235886	0.139606
cg05837855	NM_203315	BDH1	0.00946756	0.554175	0.414629	0.139546
cg02349186			0.000336738	0.300235	0.160781	0.139454
cg01854491	NM_198488	FAM83H	0.00101055	0.673586	0.534169	0.139417
cg26328687	NM_032427	MAML2	0.00168136	0.470606	0.331189	0.139417
cg26710619			0.00186028	0.583451	0.722743	-0.139291
cg27201625	NM_006257	PRKCQ	0.0082544	0.40713	0.267955	0.139175
cg13499923			0.00101055	0.66484	0.803929	-0.139088
cg14843888	NM_001128839;NM_000720;NM_001128840	CACNA1D;CACNA1D;CACNA1D	0.00432125	0.767412	0.628439	0.138973
cg05076730	NR_031612;NR_003367	MIR1207;PVT1	0.00198112	0.475897	0.337141	0.138755
cg09849319	NM_024830	LPCAT1	0.0057972	0.456154	0.317482	0.138672
cg21105955	NM_014641	MDC1	0.0057972	0.478862	0.34019	0.138672
cg10211414	NM_012102;NM_001042681	RERE;RERE	0.00539169	0.426512	0.565131	-0.138619
cg05957749	NM_015038;NM_015038;NM_012090;NM_033044	KIAA0754;KIAA0754;MACF1;MACF1	0.000407605	0.449909	0.588487	-0.138578
cg14423778	NM_207292;NM_021038;NR_027038;NR_027037	MBNL1;MBNL1;LOC401093;LOC401093	0.00400884	0.430963	0.569521	-0.138558
cg07114810			0.00214826	0.381656	0.243159	0.138497
cg26275799			0.00182573	0.463552	0.325078	0.138474
cg20863321	NM_005336	HDLBP	0.00884283	0.545005	0.406867	0.138138
cg08024174			0.000775778	0.427356	0.289254	0.138101
cg24389386	NR_001434	HLA-H	0.00951137	0.578477	0.716554	-0.138077
cg02569509			0.000709274	0.528383	0.6664	-0.138017
cg02625222	NM_173689	CRB2	0.00400884	0.698387	0.560551	0.137836
cg23840027	NM_203342;NM_203343;NM_004437;NM_001166007;NM_001166005	EPB41;EPB41;EPB41;EPB41;EPB41	0.00717946	0.387714	0.5255	-0.137786
cg03962217	NR_028090	LOC202781	0.0029502	0.368181	0.230424	0.137757
cg18156471	NM_001884	HAPLN1	0.0029502	0.506938	0.369189	0.137749
cg14412134	NM_005956	MTHFD1	0.0013077	0.48995	0.352279	0.137672
cg04993279			0.00344351	0.441437	0.579079	-0.137641
cg04747693			0.000647979	0.606866	0.744502	-0.137636
cg08822136			0.00252088	0.683563	0.545928	0.137636
cg14241836			0.0013077	0.522624	0.384997	0.137626
cg18311708	NR_027789;NR_027788	ZNF767;ZNF767	0.00110857	0.424684	0.287102	0.137582
cg17910564	NM_001135694;NM_005662	VDAC3;VDAC3	0.000407605	0.523624	0.386059	0.137565
cg01720520	NM_006669	LILRB1	0.000925989	0.562777	0.425242	0.137535
cg09379146	NM_015508	TIPARP	0.00622935	0.600441	0.737876	-0.137435
cg12394014	NM_006791;NM_206839	MORF4L1;MORF4L1	2.89698e-06	0.759861	0.622429	0.137432
cg09197761	NM_001002844;NM_017661;NM_001002843	ZNF280D;ZNF280D;ZNF280D	0.00272801	0.719587	0.856972	-0.137384
cg16190732	NM_001127895;NM_001127895;NM_001127896;NM_001127896	CHST8;CHST8;CHST8;CHST8	0.000925989	0.205122	0.342402	-0.137279
cg17381692			0.0066896	0.687509	0.824672	-0.137164
cg04847110			0.00501141	0.376091	0.513222	-0.137132
cg19404979	NM_022142;NM_022142	ELSPBP1;ELSPBP1	0.000934316	0.499084	0.362023	0.137061
cg01757168			0.00110202	0.620931	0.757979	-0.137048
cg01561629	NM_024586;NM_148906;NM_148908;NM_148909	OSBPL9;OSBPL9;OSBPL9;OSBPL9	0.00120089	0.648997	0.785971	-0.136974
cg08964643			0.000407605	0.715842	0.852664	-0.136823
cg09800105			2.03143e-05	0.684491	0.8213	-0.136808
cg04931184	NM_152868;NM_004981	KCNJ4;KCNJ4	0.000775778	0.381619	0.244841	0.136778
cg02039987	NM_001083112	GPD2	0.000110886	0.476036	0.339347	0.136689
cg10361005			0.00182573	0.262003	0.39866	-0.136657
cg17333973	NM_000218;NM_181798	KCNQ1;KCNQ1	0.000898278	0.289385	0.425926	-0.136541
cg13252540	NM_001012337	ROPN1B	0.0029502	0.459522	0.595915	-0.136393
cg21031692	NM_001171174;NM_001171171;NM_001171172;NM_001337	CX3CR1;CX3CR1;CX3CR1;CX3CR1	0.00232791	0.637142	0.773514	-0.136372
cg00204748	NM_018099;NM_018099	FAR2;FAR2	0.000775778	0.687282	0.551	0.136282
cg04654299			0.0013077	0.332592	0.468761	-0.136169
cg22657044	NM_018683	RNF114	0.00400884	0.773546	0.637595	0.135951
cg06813419	NM_004619;NM_001033910	TRAF5;TRAF5	0.00318837	0.650831	0.514983	0.135848
cg17157198	NM_006060	IKZF1	0.00339846	0.580072	0.444308	0.135764
cg09978023	NM_002927;NM_144766	RGS13;RGS13	0.00501141	0.54824	0.412545	0.135694
cg01800148	NM_001135585;NR_024180;NM_003039	SLC2A5;SLC2A5;SLC2A5	0.0057972	0.301103	0.436736	-0.135632
cg04495993	NM_018967	SNTG1	0.000205893	0.628464	0.764025	-0.135561
cg26430986	NM_014211	GABRP	0.00620609	0.520418	0.384917	0.135501
cg02723617	NM_004935;NM_001164410;NM_003040	CDK5;CDK5;SLC4A2	0.00371664	0.386575	0.251087	0.135489
cg23615741			0.000227564	0.471981	0.607462	-0.135482
cg16372051	NM_005346	HSPA1B	0.00465502	0.384631	0.249193	0.135438
cg25417675			0.000491803	0.56681	0.702079	-0.135269
cg24951886	NM_152751;NM_001100912	BEND7;BEND7	0.000407605	0.57788	0.442736	0.135143
cg26781129	NM_001134441;NM_001134440;NM_001134442;NM_033210	ZNF502;ZNF502;ZNF502;ZNF502	0.00455336	0.398284	0.533391	-0.135107
cg23659134	NM_183239	GSTO2	0.000407605	0.7359	0.87096	-0.135061
cg21964798	NM_024830	LPCAT1	0.00539169	0.757914	0.62286	0.135054
cg17654050	NM_006186	NR4A2	8.03836e-05	0.533977	0.669029	-0.135053
cg02722434			0.00154733	0.706506	0.841549	-0.135042
cg15919066	NM_003877	SOCS2	0.00198112	0.627894	0.762935	-0.135041
cg19766471	NR_024621;NM_139022;NM_001142946	C11orf21;TSPAN32;C11orf21	1.79907e-05	0.336507	0.20152	0.134987
cg22168489	NM_144668	WDR66	0.0057972	0.66129	0.796272	-0.134982
cg19491207	NM_018968	SNTG2	4.53949e-05	0.529802	0.394833	0.134969
cg20457732			0.000539576	0.403784	0.53862	-0.134836
cg27333886	NM_001145714;NM_001145713;NR_027280;NM_005500	SAE1;SAE1;SAE1;SAE1	0.00198112	0.383452	0.248635	0.134817
cg26531286	NM_001001715;NM_005766	FARP1;FARP1	0.0082544	0.492662	0.357851	0.134811
cg09035930	NM_145648	SLC15A4	0.00214826	0.570911	0.436294	0.134616
cg16707952	NM_001954;NM_013993	DDR1;DDR1	0.000370631	0.548549	0.413963	0.134586
cg22508831	NM_001024843;NM_001162501;NM_015088	TNRC6B;TNRC6B;TNRC6B	0.0082544	0.378409	0.243848	0.134561
cg01916685	NR_027786	SERHL	0.0029502	0.410112	0.544628	-0.134516
cg09977847	NM_021141	XRCC5	0.00465502	0.572224	0.437718	0.134506
cg24700494	NM_014641	MDC1	0.000205893	0.584526	0.450095	0.134431
cg05702052	NM_024942	C10orf88	0.00946756	0.648331	0.782752	-0.134421
cg12498580			0.00501141	0.399935	0.265551	0.134384
cg00214171	NM_004259;NM_001162997	RECQL5;LOC100130933	0.00110202	0.45436	0.588738	-0.134379
cg25641145	NM_198401	ANKRD46	0.00717946	0.493629	0.359283	0.134345
cg21073212	NM_004798	KIF3B	0.000847879	0.449597	0.315254	0.134343
cg21448423	NM_015547;NM_015547;NM_147161;NM_147161	ACOT11;ACOT11;ACOT11;ACOT11	0.0057972	0.479433	0.613756	-0.134322
cg06949933	NM_152392	AHSA2	0.00539169	0.507433	0.373114	0.134318
cg21097733	NM_002145	HOXB2	6.52956e-06	0.674906	0.809141	-0.134236
cg13692134			0.00371664	0.55554	0.689695	-0.134155
cg20536364			0.000370631	0.688584	0.822731	-0.134147
cg21908420	NM_144728;NM_007207;NM_144729	DUSP10;DUSP10;DUSP10	0.00232135	0.826881	0.692788	0.134093
cg23507953	NM_002146	HOXB3	9.97036e-05	0.377071	0.511152	-0.134082
cg01662650	NM_206923;NM_015884	YY2;MBTPS2	0.00101055	0.629606	0.763544	-0.133938
cg14118850	NM_002149;NM_134421	HPCAL1;HPCAL1	4.6132e-05	0.624495	0.758393	-0.133899
cg05994974	NM_022750	PARP12	0.000136777	0.433273	0.567082	-0.133809
cg26405097	NM_004973	JARID2	0.0013077	0.482946	0.616742	-0.133796
cg17715243	NM_014023	WDR37	0.00049451	0.702772	0.568992	0.13378
cg21611682	NM_002335	LRP5	0.000591527	0.35251	0.218746	0.133763
cg00568164	NM_130783;NM_001031730	TSPAN18;TSPAN18	0.0013077	0.431889	0.298174	0.133715
cg24082526	NR_026712;NR_000020;NR_000018;NR_000019;NM_012423;NR_000021	RPL13AP5;SNORD33;SNORD35A;SNORD34;RPL13A;SNORD32A	0.00371664	0.627322	0.493658	0.133664
cg04913265	NM_032801	JAM3	0.0057972	0.723421	0.589876	0.133545
cg21771569	NM_003159	CDKL5	0.0066896	0.455086	0.588581	-0.133494
cg08189198	NM_182946;NM_020921;NM_182944;NM_016350;NM_016350	NIN;NIN;NIN;NIN;NIN	0.00432125	0.447945	0.314481	0.133464
cg17093478	NM_031849;NM_018905;NM_031411;NM_031857;NM_018910;NM_018900;NM_018909;NM_018908;NM_018901;NM_018906;NM_018907;NM_031860;NM_018911	PCDHA6;PCDHA2;PCDHA1;PCDHA9;PCDHA7;PCDHA1;PCDHA6;PCDHA5;PCDHA10;PCDHA3;PCDHA4;PCDHA10;PCDHA8	0.000447907	0.631277	0.764736	-0.133459
cg15590007	NM_000698	ALOX5	9.97036e-05	0.480285	0.346849	0.133435
cg16660091	NM_000078;NM_000078	CETP;CETP	0.000151703	0.400088	0.533506	-0.133418
cg01843999			0.000205893	0.511675	0.378257	0.133418
cg23926543	NM_000124	ERCC6	0.00142298	0.734766	0.601357	0.13341
cg15625636	NM_003608	GPR65	0.000123209	0.619945	0.486538	0.133408
cg21257293			0.00182573	0.335468	0.468839	-0.133371
cg09004241	NM_145236	B3GNT7	0.00318837	0.269575	0.136216	0.133359
cg24796651	NM_018115	SDAD1	0.0022798	0.35716	0.223862	0.133298
cg13750264	NM_001083909	GPR123	0.00770052	0.604683	0.47156	0.133123
cg04265188			6.45615e-05	0.725207	0.85831	-0.133104
cg07833467	NM_138433;NM_138433	KLHDC7B;KLHDC7B	0.0057972	0.205812	0.338907	-0.133095
cg26761826	NM_152765	C8orf46	0.00884283	0.518991	0.385907	0.133084
cg05007126	NM_080489	SDCBP2	0.000370631	0.493255	0.360253	0.133002
cg15257836			0.00182573	0.432009	0.299038	0.132971
cg17326451	NM_021151;NR_015381;NR_026585;NM_001143935	CROT;TP53TG1;CROT;CROT	0.00770052	0.447095	0.58006	-0.132966
cg04557294	NM_014734	KIAA0247	0.000775778	0.585398	0.452467	0.132931
cg23189175	NM_001702	BAI1	0.000709274	0.760097	0.627174	0.132923
cg07441152	NM_198488	FAM83H	0.00160136	0.673516	0.54064	0.132876
cg18399451	NM_001128164;NM_000332	ATXN1;ATXN1	0.00717946	0.619214	0.486435	0.132779
cg17573270	NM_014509	SERHL2	0.00318837	0.838324	0.705579	0.132745
cg06738887	NM_001136015;NM_004039;NM_001002858;NM_001002857	ANXA2;ANXA2;ANXA2;ANXA2	0.00168136	0.420697	0.553349	-0.132652
cg11472424	NM_002625;NM_002625	PFKFB1;PFKFB1	0.00182573	0.483457	0.616096	-0.132639
cg07813142	NM_001003845	SP5	0.000186125	0.144102	0.276737	-0.132635
cg25308322			0.0057972	0.528855	0.396234	0.132621
cg19546057	NM_145013;NM_000890	C11orf45;KCNJ5	0.000407605	0.305182	0.437736	-0.132554
cg18826274			0.00432125	0.560997	0.428459	0.132538
cg21572897	NM_005191	CD80	0.00120089	0.604566	0.472262	0.132304
cg20228731	NR_015431;NR_024153	FLJ43663;FLJ43663	0.00465502	0.457452	0.325185	0.132266
cg04864179	NM_001098630;NM_001098627;NM_032643;NM_001098631;NM_002200;NM_001098629;NM_001098628	IRF5;IRF5;IRF5;IRF5;IRF5;IRF5;IRF5	0.00120089	0.389167	0.256915	0.132252
cg01894875	NM_001146310;NR_024445;NM_182533	C1orf86;LOC100128003;C1orf86	0.0013077	0.633455	0.765694	-0.132239
cg20684197	NM_001144935;NM_001144934;NM_033136;NM_000800;NR_026696;NR_026695	FGF1;FGF1;FGF1;FGF1;FGF1;FGF1	0.00886199	0.555765	0.423623	0.132142
cg10499172	NM_014026	DCPS	0.00110202	0.410391	0.278278	0.132113
cg07520269	NM_001364;NM_001142699;NM_001364	DLG2;DLG2;DLG2	0.00252088	0.315538	0.447579	-0.13204
cg22176709			0.00272801	0.337069	0.469033	-0.131965
cg13485718			0.000434933	0.275236	0.407191	-0.131955
cg23387863	NM_024776	SGK269	1.22229e-06	0.711974	0.843874	-0.1319
cg04100190	NM_001852	COL9A2	0.000186125	0.608843	0.476997	0.131846
cg04370174	NM_018986	SH3TC1	0.00198112	0.25995	0.391777	-0.131827
cg05962382			0.00501141	0.574143	0.705945	-0.131802
cg07076850			0.0057972	0.41521	0.546999	-0.131788
cg05194346			0.00622935	0.564908	0.696546	-0.131638
cg26585452			0.00318837	0.81802	0.686544	0.131476
cg15279364	NM_001134451;NM_152913;NM_001134450	TMEM130;TMEM130;TMEM130	0.000370631	0.429042	0.297596	0.131447
cg19193595	NM_005902	SMAD3	0.000709274	0.632032	0.763461	-0.131429
cg14403099			0.00371664	0.753721	0.885113	-0.131392
cg01370294			0.000136777	0.782322	0.650964	0.131358
cg17513592			0.000168109	0.648907	0.517558	0.131349
cg27117982	NM_145791;NM_145792;NM_145792;NM_020300	MGST1;MGST1;MGST1;MGST1	0.000186125	0.495546	0.626817	-0.131272
cg00869215	NR_002711	CLK2P	3.66865e-05	0.68081	0.812066	-0.131256
cg05415936	NM_004760	STK17A	0.000647979	0.67537	0.544171	0.131199
cg17664128	NM_032488	CNFN	0.000151703	0.372626	0.241457	0.131169
cg04737759			0.00214826	0.384277	0.515427	-0.131151
cg17065772	NM_003298	NR2C2	0.00154733	0.503956	0.635047	-0.131091
cg25628989	NM_033396	TNKS1BP1	0.000647979	0.406039	0.274952	0.131088
cg17606183	NM_019111	HLA-DRA	0.00120089	0.462986	0.331912	0.131074
cg25140783	NM_013441	RCAN3	0.00101055	0.554269	0.423239	0.13103
cg24268663	NM_000808;NR_029521	GABRA3;MIR105-1	0.000277283	0.56773	0.698726	-0.130997
cg15777261	NR_029402;NR_029403;NM_001009570;NM_006429;NM_001166284;NM_001166285	CCT7;CCT7;CCT7;CCT7;CCT7;CCT7	0.00252088	0.58431	0.453381	0.13093
cg24760467	NM_032429	LZTS2	0.00232791	0.447886	0.57873	-0.130844
cg26624021	NM_000078	CETP	0.000709274	0.64174	0.772521	-0.130781
cg17511472	NM_173660;NM_001164673	DOK7;DOK7	0.0066896	0.694867	0.825646	-0.130779
cg09292244	NM_001080826	PRAGMIN	0.00214826	0.82979	0.699109	0.130681
cg14211075	NM_001162427;NM_001162426;NM_000368	TSC1;TSC1;TSC1	1.69844e-05	0.556521	0.425882	0.130639
cg21089930	NM_015177	DTX4	0.00252088	0.430103	0.560737	-0.130634
cg04442806	NM_182935;NM_182935;NR_003090	MOBP;MOBP;MOBP	0.000136777	0.775905	0.645274	0.130632
cg07195224	NM_004833	AIM2	0.00344351	0.656126	0.525557	0.13057
cg20652899	NM_001164831;NM_022003;NM_001164832;NM_001164837;NM_001164836	FXYD6;FXYD6;FXYD6;FXYD6;FXYD6	0.000251303	0.511467	0.641846	-0.130379
cg07796014	NM_005333;NM_001122608	HCCS;HCCS	0.000205893	0.335968	0.466296	-0.130328
cg11915812	NM_002149;NM_134421	HPCAL1;HPCAL1	0.00272801	0.630648	0.500378	0.13027
cg00904966	NR_027242	LOC146336	0.000370631	0.339372	0.469529	-0.130157
cg01739960			0.000407605	0.649859	0.779969	-0.13011
cg08632810	NM_012154;NM_001164623	EIF2C2;EIF2C2	0.00400884	0.257206	0.38725	-0.130044
cg13696490	NR_026915	LOC201651	0.00465502	0.710921	0.580954	0.129967
cg21290162			0.000277283	0.634549	0.764431	-0.129882
cg20271361	NM_198384;NM_198379;NM_198380;NM_198377;NM_198385;NM_018896;NM_198396;NM_198386;NM_198376;NM_198397;NM_198388;NM_198383;NM_198382;NM_198378;NM_198387	CACNA1G;CACNA1G;CACNA1G;CACNA1G;CACNA1G;CACNA1G;CACNA1G;CACNA1G;CACNA1G;CACNA1G;CACNA1G;CACNA1G;CACNA1G;CACNA1G;CACNA1G	0.000205893	0.329682	0.199813	0.129869
cg13719901	NM_024750;NM_024512	LRRC2;LRRC2	0.000591527	0.697413	0.827216	-0.129803
cg15720535	NM_006412;NM_001012727	AGPAT2;AGPAT2	3.81861e-06	0.518697	0.388928	0.129769
cg21125207			2.18556e-06	0.625957	0.755662	-0.129705
cg18476690	NM_001161452;NM_153611;NM_001161454	CYBASC3;CYBASC3;CYBASC3	0.00120089	0.455051	0.325436	0.129616
cg00839584	NM_000575;NM_000575	IL1A;IL1A	0.00272801	0.461801	0.59141	-0.129609
cg23621013	NM_205855;NM_205855	FAM180A;FAM180A	0.0066896	0.515358	0.385786	0.129572
cg03833774	NM_152694	ZCCHC5	0.000766631	0.375189	0.504719	-0.129531
cg09846895			0.00465502	0.76231	0.632823	0.129488
cg02538169	NM_022574	GIGYF1	0.00142298	0.458486	0.5879	-0.129414
cg02176280	NM_052920	KLHL29	0.00465502	0.7163	0.845714	-0.129414
cg22335872	NM_015985;NM_015985	ANGPT4;ANGPT4	0.0066896	0.523506	0.394188	0.129318
cg14437002			7.2074e-05	0.523555	0.652835	-0.12928
cg22587600			0.00371664	0.66704	0.796279	-0.129238
cg06182923	NM_052896	CSMD2	0.00110202	0.635578	0.764797	-0.129218
cg03270204	NM_001954;NM_013993	DDR1;DDR1	0.000305694	0.707135	0.578024	0.129111
cg11826961	NM_003250;NM_199334	THRA;THRA	0.00182573	0.358639	0.487588	-0.128949
cg06381803	NM_012155	EML2	0.000168109	0.697925	0.569015	0.128911
cg14339466			0.00120089	0.767188	0.638364	0.128824
cg20898273	NM_000441;NR_028137	SLC26A4;LOC286002	0.00120089	0.795917	0.667136	0.12878
cg24362829			0.000168109	0.357172	0.485935	-0.128763
cg20995835	NM_182568	CCDC144B	0.00465502	0.522415	0.651172	-0.128757
cg15873449	NM_080423;NM_002828;NM_080422	PTPN2;PTPN2;PTPN2	8.03836e-05	0.768266	0.639538	0.128728
cg15173134	NM_003054	SLC18A2	0.000123209	0.244789	0.373516	-0.128727
cg07660635	NM_002163	IRF8	0.00120089	0.61934	0.490637	0.128702
cg00842595	NM_001013672	C17orf97	0.000647979	0.604396	0.733061	-0.128665
cg11284147			0.00318837	0.512629	0.641243	-0.128613
cg21565575	NM_175077;NM_032214;NM_032214;NM_175077	SLA2;SLA2;SLA2;SLA2	0.00717946	0.404755	0.533317	-0.128561
cg06580800			0.0082544	0.477711	0.349228	0.128483
cg08458692	NM_001004306;NM_001004306	CCDC144NL;CCDC144NL	0.000407605	0.641924	0.770352	-0.128427
cg25985504			0.00465502	0.331987	0.460404	-0.128417
cg10491452			0.00198112	0.225135	0.353551	-0.128416
cg00349404			3.66865e-05	0.485449	0.613846	-0.128397
cg09948419	NM_033054	MYO1G	0.00770052	0.53962	0.411239	0.128381
cg12068280	NM_022462;NM_152795	HIF3A;HIF3A	0.00101055	0.290556	0.418937	-0.128381
cg21540359			0.00488071	0.640696	0.769068	-0.128372
cg26555664			0.000251303	0.660298	0.788667	-0.128369
cg08422803	NM_000211;NM_001127491	ITGB2;ITGB2	0.00272801	0.520107	0.391767	0.12834
cg02343604	NM_002167	ID3	0.000775778	0.520069	0.391747	0.128323
cg27053580	NM_001002254	AWAT2	0.000151703	0.483036	0.354717	0.128319
cg14161821	NM_015061;NM_001146694;NM_001146695;NM_001146696	KDM4C;KDM4C;KDM4C;KDM4C	0.000123209	0.341548	0.469854	-0.128306
cg21049825			0.000447907	0.456503	0.328209	0.128294
cg01116491	NM_001127507;NM_017935	BANK1;BANK1	5.77757e-05	0.803408	0.675155	0.128253
cg12352225	NM_015550;NM_145322;NM_145320;NM_145321	OSBPL3;OSBPL3;OSBPL3;OSBPL3	0.00272801	0.938323	0.810118	0.128205
cg07575896	NM_033274	ADAM19	0.00371664	0.46277	0.334647	0.128123
cg07314983	NM_000560;NM_001040033	CD53;CD53	0.00214826	0.457559	0.329474	0.128086
cg24622544			0.0082544	0.377146	0.249118	0.128029
cg21444500			0.00214826	0.75484	0.626852	0.127988
cg21664636			0.0066896	0.750856	0.622872	0.127983
cg09440866			0.00232791	0.355324	0.227348	0.127976
cg16625671			0.00371664	0.478485	0.606339	-0.127855
cg19667211	NM_001080477	ODZ3	0.00318837	0.664576	0.792402	-0.127825
cg11086127	NM_080841;NM_002836;NM_080840	PTPRA;PTPRA;PTPRA	0.00252088	0.580822	0.70862	-0.127798
cg15319470	NM_178539	FAM19A2	0.00717946	0.514081	0.386287	0.127794
cg23477348	NM_198155;NM_004649	C21orf33;C21orf33	4.6132e-05	0.501467	0.373691	0.127775
cg02093833			0.00884283	0.525477	0.39776	0.127717
cg08130572	NM_002037;NM_153048	FYN;FYN	0.00168136	0.24275	0.370346	-0.127596
cg14114546	NM_005779	LHFPL2	0.0082544	0.400909	0.528499	-0.12759
cg00942920	NM_001136190;NM_017773;NM_017773	LAX1;LAX1;LAX1	0.00252088	0.489477	0.361893	0.127583
cg26230275	NM_002966	S100A10	0.00432125	0.603273	0.730832	-0.127559
cg14155058			0.0066896	0.215601	0.343104	-0.127503
cg24298280	NM_152553	RNF217	0.00465502	0.665692	0.538201	0.127491
cg09088988	NM_145001;NM_001112724	STK32A;STK32A	7.2074e-05	0.265973	0.393438	-0.127465
cg04335714			0.000205893	0.258506	0.385945	-0.127439
cg23693485	NM_018988	GFOD1	0.00318837	0.27871	0.406126	-0.127416
cg21469772	NM_199160;NM_014368	LHX6;LHX6	0.000775778	0.817224	0.944622	-0.127398
cg00555420	NM_153365	TAPT1	0.000227564	0.719175	0.846542	-0.127367
cg02959816	NM_001007525	NWD1	0.00101327	0.47823	0.35087	0.12736
cg22486834	NM_001512	GSTA4	0.00770052	0.44745	0.574794	-0.127345
cg11009100	NM_001098500	KIAA1217	0.00120089	0.580802	0.453513	0.127289
cg11418177	NM_000585;NM_172174	IL15;IL15	0.00182573	0.359455	0.232276	0.127179
cg26216433			0.000539576	0.234396	0.361538	-0.127142
cg03840849	NM_182762	MACC1	0.00344351	0.535751	0.408663	0.127088
cg21350697	NM_001143757;NM_030626;NM_001143759;NM_001143758;NR_026559	LRRC27;LRRC27;LRRC27;LRRC27;LRRC27	0.00539169	0.495874	0.622956	-0.127082
cg08506869	NM_001080394	KIAA0146	0.00120089	0.608013	0.73508	-0.127067
cg21711862			0.00465502	0.58546	0.458516	0.126944
cg23334662	NM_144629;NM_144629	RFTN2;RFTN2	0.000186125	0.407138	0.533994	-0.126857
cg04434593	NR_024469;NM_013246;NM_001166212	LOC100130987;CLCF1;CLCF1	0.000407605	0.268977	0.142158	0.126819
cg06154903	NM_006795	EHD1	5.77757e-05	0.721023	0.594223	0.1268
cg17794299			0.00120089	0.214933	0.341726	-0.126793
cg01030476	NM_201543;NM_006499;NM_201545;NM_201544	LGALS8;LGALS8;LGALS8;LGALS8	0.0029502	0.643552	0.770256	-0.126705
cg18523477	NM_017495;NM_183425	RBM38;RBM38	0.000647979	0.416599	0.289931	0.126668
cg19722698	NM_182729;NM_182743;NM_001093771;NM_003330;NM_182742	TXNRD1;TXNRD1;TXNRD1;TXNRD1;TXNRD1	0.00142298	0.614032	0.487382	0.126651
cg10318744			0.00432125	0.445742	0.319104	0.126639
cg23359665	NM_005155;NM_030651;NM_138717	PPT2;PRRT1;PPT2	0.000647979	0.627474	0.50091	0.126565
cg26334023	NM_016428;NM_031498;NM_001135186	ABI3;GNGT2;ABI3	0.000770054	0.555148	0.428656	0.126492
cg06012804			0.000863533	0.252035	0.125587	0.126448
cg14285788	NM_032740	SFT2D3	5.16524e-05	0.636948	0.510515	0.126433
cg04661436	NM_006791;NM_206839	MORF4L1;MORF4L1	0.00622935	0.619341	0.492938	0.126404
cg00765705	NM_006312;NM_001077261	NCOR2;NCOR2	0.00622935	0.265182	0.391546	-0.126365
cg04303590			0.00120089	0.688916	0.562563	0.126353
cg12289553	NM_001079516	ASAH2B	0.00539169	0.399937	0.526231	-0.126294
cg10559220	NM_001127197	ELF4	0.00232791	0.661677	0.78797	-0.126293
cg22855988	NM_031314;NM_001077442;NM_001077443;NM_004500	HNRNPC;HNRNPC;HNRNPC;HNRNPC	0.000151703	0.410039	0.283747	0.126292
cg24497361	NM_001665	RHOG	0.00252088	0.49193	0.36568	0.126251
cg20640246			0.00465502	0.284156	0.410388	-0.126232
cg06785060	NM_024503;NM_001127714	HIVEP3;HIVEP3	0.000539576	0.678551	0.804759	-0.126208
cg17648076			5.34023e-05	0.786163	0.912327	-0.126164
cg19982684			0.00168136	0.467212	0.593342	-0.12613
cg06473675	NM_212556	ASB18	0.00120089	0.486327	0.360199	0.126128
cg22044342	NM_002558	P2RX1	0.00232791	0.319886	0.445999	-0.126113
cg09781307	NR_002832	BDNFOS	0.00120089	0.387025	0.26097	0.126055
cg06557644	NM_006092	NOD1	0.00198112	0.255633	0.381615	-0.125982
cg13874425			0.00622935	0.481074	0.607005	-0.125931
cg08604416	NM_015385;NM_024991	SORBS1;SORBS1	0.00530429	0.401293	0.275391	0.125902
cg11826008	NM_152931;NM_152926;NM_152930;NM_152929;NM_152925;NM_152838;NM_152928;NM_152927;NM_006047	CPNE1;CPNE1;CPNE1;CPNE1;CPNE1;RBM12;CPNE1;CPNE1;RBM12	0.000186125	0.49502	0.369141	0.125879
cg08993878			0.00214826	0.565354	0.691214	-0.125859
cg01754525			0.00252088	0.588416	0.714131	-0.125715
cg13504059	NM_001838	CCR7	0.000205893	0.371848	0.246536	0.125313
cg23849826	NM_003246	THBS1	0.00465502	0.671716	0.797006	-0.12529
cg08598221	NM_021021	SNTB1	0.000709274	0.325325	0.450592	-0.125267
cg10912292	NM_152989	SOX5	0.00501141	0.767703	0.642455	0.125248
cg04462378	NM_006185	NUMA1	0.0057972	0.283862	0.409095	-0.125233
cg13213889	NM_002531	NTSR1	0.00501141	0.57078	0.445573	0.125207
cg27041619			0.00118021	0.441163	0.566321	-0.125158
cg04922803	NM_031302	GLT8D2	0.000925989	0.642052	0.76715	-0.125098
cg01765641	NM_014744;NM_014744;NM_001134380	TBC1D5;TBC1D5;TBC1D5	0.00101055	0.772732	0.647737	0.124995
cg06417962	NM_002939;NM_203386;NM_203387;NM_203389;NM_203383;NM_203384;NM_203385;NM_203388	RNH1;RNH1;RNH1;RNH1;RNH1;RNH1;RNH1;RNH1	0.0029502	0.651345	0.776327	-0.124982
cg04694619	NM_001001666;NM_001001891	ANO7;ANO7	0.000305694	0.604392	0.47946	0.124932
cg16047471	NM_030762	BHLHE41	0.00232791	0.393293	0.268385	0.124908
cg22737154			0.0013077	0.524067	0.64897	-0.124903
cg20005057	NM_031412	GABARAPL1	5.16524e-05	0.393087	0.268241	0.124846
cg17457912	NR_028505;NR_028503;NR_028504;NR_028502	C17orf91;C17orf91;C17orf91;C17orf91	0.00400884	0.305135	0.42993	-0.124794
cg20276630			5.16524e-05	0.338307	0.213595	0.124712
cg08474748			0.00344351	0.667662	0.792371	-0.124709
cg07870378	NM_145253	FAM100A	0.000277283	0.774585	0.649905	0.12468
cg13333954			0.00168136	0.346822	0.471443	-0.124622
cg20884605	NM_000690	ALDH2	0.000925989	0.302501	0.427077	-0.124576
cg17185921			0.00313792	0.751408	0.626847	0.124561
cg05093429	NR_028288	TCL6	0.00333261	0.522946	0.398415	0.124531
cg17416793	NM_000218;NM_181798	KCNQ1;KCNQ1	0.00168136	0.430281	0.554793	-0.124512
cg17875845	NM_001166693;NM_005935	AFF1;AFF1	0.00539169	0.599268	0.723707	-0.124439
cg15659599	NM_006866;NM_001130917	LILRA2;LILRA2	0.00252088	0.686962	0.562526	0.124436
cg04472001			0.0013077	0.333631	0.209195	0.124436
cg19089328	NM_018161	NADSYN1	0.000336738	0.668633	0.793069	-0.124436
cg03969079	NM_032199	ARID5B	0.000539576	0.564163	0.439741	0.124422
cg19569526	NM_001128209;NM_172244;NM_000337	SGCD;SGCD;SGCD	0.0066896	0.742549	0.866962	-0.124413
cg19691659	NM_015080;NM_138732	NRXN2;NRXN2	0.000775778	0.406914	0.282525	0.124388
cg10766282			0.000251303	0.797507	0.673137	0.124371
cg07825433	NM_001328;NM_001012614	CTBP1;CTBP1	0.00717946	0.757915	0.882284	-0.124368
cg23095556	NM_001136203;NM_138442	CCDC124;CCDC124	0.00154733	0.844597	0.720251	0.124346
cg05897122			0.00120089	0.548317	0.424026	0.12429
cg04367503	NM_002501	NFIX	0.000491803	0.60239	0.478126	0.124264
cg13910813	NM_030767	AKNA	0.00142298	0.648484	0.772746	-0.124262
cg06900514			0.000234428	0.665214	0.540962	0.124252
cg01492538	NM_007353	GNA12	0.00232791	0.304122	0.42834	-0.124218
cg18121713	NM_003385	VSNL1	0.00168136	0.650648	0.526549	0.124099
cg25170017	NM_006795	EHD1	0.00198112	0.696552	0.572482	0.12407
cg23361809	NM_145687;NM_004834;NM_145686	MAP4K4;MAP4K4;MAP4K4	3.66865e-05	0.813834	0.689818	0.124017
cg00539174	NM_001336	CTSZ	0.000797749	0.397825	0.273829	0.123997
cg07059469	NM_001122740;NM_001122742;NM_000125;NM_001122741	ESR1;ESR1;ESR1;ESR1	0.000370631	0.401146	0.525138	-0.123992
cg00854273			0.00232791	0.19378	0.317747	-0.123967
cg22764925	NM_013430	GGT1	0.000168109	0.499259	0.623206	-0.123947
cg06549275	NM_001135191;NM_003887	ASAP2;ASAP2	0.00770052	0.394164	0.270248	0.123916
cg05905124	NM_030782	CLPTM1L	0.00120089	0.692393	0.568478	0.123915
cg06355570	NM_153350	FBXL16	0.0066896	0.702263	0.826098	-0.123836
cg00465247			0.000591527	0.485794	0.361973	0.123821
cg02778609	NM_019116;NR_003501;NM_001083614	UBFD1;EARS2;EARS2	0.0082544	0.480171	0.356514	0.123657
cg17826679	NM_020428;NM_001145056	SLC44A2;SLC44A2	0.00501141	0.656383	0.780014	-0.123631
cg17723143	NM_000870;NM_001040172;NM_001040171;NM_001040169;NM_199453;NM_001040174;NM_001040173	HTR4;HTR4;HTR4;HTR4;HTR4;HTR4;HTR4	0.000847879	0.291163	0.414789	-0.123626
cg21929875	NM_014312;NM_014312	VSIG2;VSIG2	0.000123209	0.768125	0.891678	-0.123552
cg21122225			0.00252088	0.314714	0.191196	0.123518
cg10464773			0.00142298	0.605652	0.729118	-0.123466
cg13431037			0.000407605	0.800597	0.677281	0.123316
cg18649319			0.00622935	0.565113	0.441797	0.123316
cg03181524	NM_000540;NM_001042723	RYR1;RYR1	0.00465502	0.629883	0.506657	0.123227
cg21443659			7.2074e-05	0.364966	0.488191	-0.123226
cg10923838	NM_007174	CIT	0.000491803	0.671918	0.548722	0.123196
cg23538773			0.00432125	0.709722	0.832914	-0.123192
cg22114991			0.00198112	0.419362	0.542535	-0.123173
cg09997532	NM_005114	HS3ST1	0.000775778	0.319201	0.196032	0.12317
cg13984746	NM_173620	HEXDC	0.000447907	0.452739	0.329571	0.123168
cg07235577	NM_018967	SNTG1	0.00120089	0.397123	0.273954	0.123168
cg12942878	NR_026877;NM_020386	MGC2889;HRASLS	0.00272801	0.548199	0.425043	0.123156
cg18893596			0.000110886	0.628681	0.505576	0.123105
cg03217995	NM_152739	HOXA9	4.11601e-05	0.343593	0.466692	-0.123099
cg20693334	NM_024015	HOXB4	1.89426e-06	0.286649	0.409748	-0.123098
cg17810765	NM_001001666;NM_001001891	ANO7;ANO7	0.000227564	0.568656	0.445583	0.123073
cg04904276	NM_015914	TXNDC11	0.000205893	0.721473	0.598472	0.123001
cg25289658	NM_001167819;NR_027621;NM_001159701;NM_001159704;NM_001159703;NM_001159702;NM_001159700;NM_001449;NM_001159699	FHL1;FHL1;FHL1;FHL1;FHL1;FHL1;FHL1;FHL1;FHL1	0.00465502	0.500645	0.623604	-0.122959
cg18493761			0.00168136	0.603882	0.72674	-0.122858
cg09577804			0.00530429	0.300668	0.177829	0.122839
cg00460983			0.000539576	0.634813	0.757644	-0.122831
cg19963522	NM_001130700;NM_015553	IPCEF1;IPCEF1	0.00252088	0.356168	0.233363	0.122805
cg08814947	NM_144947;NM_001167605;NM_001136032;NM_006853	KLK11;KLK11;KLK11;KLK11	0.00400884	0.456831	0.579609	-0.122778
cg04788926			0.00232791	0.704142	0.826847	-0.122706
cg13889934	NM_001025616;NM_001042669;NM_031305	ARHGAP24;ARHGAP24;ARHGAP24	0.00240767	0.273134	0.395836	-0.122702
cg02352281			0.00214826	0.695821	0.573124	0.122697
cg02169713			0.00717946	0.49184	0.614529	-0.122689
cg00329411			0.000775778	0.62035	0.742929	-0.122579
cg08355157	NR_024394	LOC154822	0.0082544	0.507122	0.384605	0.122517
cg15166900	NM_006407	ARL6IP5	6.45615e-05	0.515912	0.39345	0.122462
cg24297418			0.000434933	0.844669	0.722256	0.122414
cg18319852	NM_005355;NM_030615	KIF25;KIF25	0.0013077	0.454049	0.576428	-0.122379
cg06025456	NM_005155;NM_030651;NM_138717	PPT2;PRRT1;PPT2	0.00432125	0.725882	0.603551	0.122331
cg01620611	NM_012121	CDC42EP4	0.00272801	0.328321	0.45065	-0.122329
cg01091514			0.000539576	0.293663	0.17136	0.122303
cg04182865	NM_183399	RNF14	7.2074e-05	0.680233	0.557994	0.12224
cg25526001	NM_207373	C10orf99	0.00400884	0.392814	0.270615	0.1222
cg02512902	NM_014238	KSR1	0.00168136	0.554016	0.431843	0.122173
cg08462194	NR_027692;NM_002636;NM_024165	PHF1;PHF1;PHF1	0.00622935	0.733847	0.611683	0.122164
cg19849557	NM_001161376;NM_145029;NM_001109938	C6orf136;C6orf136;C6orf136	0.00455336	0.405389	0.283227	0.122162
cg15395441	NM_001164468;NM_021649;NM_001164469	TMED7-TICAM2;TICAM2;TMED7-TICAM2	0.00142298	0.471323	0.349195	0.122128
cg03309938	NM_006597;NM_153201	HSPA8;HSPA8	0.000407605	0.508873	0.386768	0.122106
cg21579239	NM_173500	TTBK2	0.00429917	0.35636	0.478443	-0.122082
cg12073436			0.00946756	0.662385	0.540314	0.122071
cg19487868	NR_028379	NCRNA00182	0.0020903	0.446266	0.568289	-0.122024
cg25773695	NM_138959	VANGL1	0.0013077	0.401321	0.279348	0.121973
cg11692021	NM_002075;NM_002075	GNB3;GNB3	0.0057972	0.573968	0.452018	0.12195
cg14635199			3.81861e-06	0.666075	0.544204	0.121871
cg07658646	NM_007244;NM_001098538	PRR4;PRR4	0.00344351	0.261523	0.383336	-0.121813
cg21426003	NM_001485	GBX2	0.000251303	0.241611	0.363365	-0.121754
cg24843157	NM_005499	UBA2	0.0024845	0.408302	0.286564	0.121738
cg18304305	NM_000163	GHR	0.000394252	0.319955	0.441688	-0.121733
cg22928599	NM_020709	PNMAL2	0.000539576	0.545346	0.42362	0.121727
cg17336139	NM_206956;NM_006115;NM_206954;NM_006115;NR_027426;NM_206955;NM_206953;NM_206954;NM_206953	PRAME;PRAME;PRAME;PRAME;LOC648691;PRAME;PRAME;PRAME;PRAME	0.000336738	0.399888	0.278184	0.121704
cg11645532	NM_015711	GLTSCR1	0.00154733	0.840909	0.719304	0.121604
cg05991220	NM_001166435;NM_001166436;NM_001166434;NM_002215	ITIH1;ITIH1;ITIH1;ITIH1	9.97036e-05	0.440862	0.319293	0.121569
cg02836478	NM_002146	HOXB3	2.58154e-05	0.709017	0.830573	-0.121556
cg02308798	NM_152519	C2orf67	0.00622935	0.455397	0.576936	-0.121539
cg24924051	NM_178868	CMTM8	0.00400884	0.493167	0.614694	-0.121527
cg08394248			0.00884283	0.618335	0.496815	0.12152
cg16075641	NM_001170574;NM_001170574	FAM46D;FAM46D	0.000539576	0.472475	0.593993	-0.121517
cg16435627	NM_182946;NM_020921;NM_016350;NM_182944	NIN;NIN;NIN;NIN	0.000110886	0.754538	0.633022	0.121516
cg11169848	NR_024469;NM_013246;NM_001166212	LOC100130987;CLCF1;CLCF1	0.00344351	0.27305	0.394528	-0.121478
cg08453205	NM_175062	RASGEF1C	0.00232791	0.537103	0.658402	-0.121299
cg16703934	NM_178562	TSPAN33	0.00120089	0.642371	0.521181	0.12119
cg03936870			0.000277283	0.528588	0.649744	-0.121156
cg00490406	NM_004833	AIM2	0.000539576	0.627797	0.506653	0.121144
cg08373904	NM_053005	HCCA2	0.00101055	0.352031	0.230888	0.121142
cg08687753	NM_001143837	NOX4	0.00400884	0.396588	0.275464	0.121124
cg01008256	NM_020246;NM_003302	SLC12A9;TRIP6	0.000370631	0.379508	0.500585	-0.121077
cg04875062	NM_001135248;NM_017459;NM_001135247;NM_002403	MFAP2;MFAP2;MFAP2;MFAP2	0.00221305	0.417068	0.538134	-0.121065
cg08623942	NM_020429;NM_181349	SMURF1;SMURF1	1.5915e-05	0.638128	0.759143	-0.121016
cg16646054	NM_032947	C5orf62	0.00432125	0.232921	0.353921	-0.121
cg05942111	NM_178169	RASSF3	0.000847879	0.692921	0.571925	0.120996
cg05107535			0.00154733	0.413161	0.534148	-0.120987
cg17616283	NM_016938	EFEMP2	9.63457e-06	0.290285	0.169315	0.12097
cg20434529	NM_175911	OR2L13	0.00432125	0.167181	0.0462226	0.120958
cg07759162			0.00252088	0.255169	0.376111	-0.120942
cg08397758	NM_032709	PYROXD2	0.000647979	0.313105	0.434005	-0.1209
cg00449067	NM_005795	CALCRL	0.000407605	0.510106	0.630987	-0.120881
cg00046899			0.00465502	0.456911	0.336048	0.120863
cg16678426	NM_019105	TNXB	0.000305694	0.59444	0.473581	0.12086
cg16562776			0.00101055	0.647081	0.767907	-0.120827
cg06691250			0.00142298	0.482094	0.602916	-0.120823
cg13586038	NM_139045;NM_003070	SMARCA2;SMARCA2	0.00198112	0.640513	0.519697	0.120816
cg26501049	NM_001100411	FAM184A	0.00272801	0.528084	0.407304	0.12078
cg09645572	NM_002737	PRKCA	0.00101055	0.540093	0.419387	0.120706
cg17284609	NM_001145819;NM_033326;NM_001145811;NM_017508	SOX6;SOX6;SOX6;SOX6	0.00272801	0.617493	0.496808	0.120686
cg09520501			0.000709274	0.766601	0.645936	0.120665
cg06958535	NM_017773;NM_001136190;NM_017773	LAX1;LAX1;LAX1	0.0057972	0.647516	0.526893	0.120623
cg09646655			0.00432125	0.431525	0.552139	-0.120614
cg13948956			0.00272801	0.507978	0.387395	0.120583
cg04276626	NR_029493	MIR21	0.000775778	0.769554	0.649044	0.120509
cg10487998	NM_000478	ALPL	0.000205893	0.381615	0.50211	-0.120495
cg08306955	NR_002174;NR_027626	CMAH;CMAH	0.00371664	0.299237	0.419691	-0.120453
cg08568554	NM_001159596;NM_017693	BIVM;BIVM	1.40627e-05	0.719356	0.839808	-0.120452
cg01046070	NM_001142497;NM_152649	MLKL;MLKL	0.00432125	0.392139	0.27169	0.12045
cg27316626	NM_004770	KCNB2	0.00318837	0.312478	0.432918	-0.12044
cg26723847	NM_052875;NM_015261	VPS26B;NCAPD3	0.00214826	0.23437	0.354769	-0.120399
cg17711527	NM_017773;NM_001136190;NM_001136190;NM_017773	LAX1;LAX1;LAX1;LAX1	0.00110202	0.370951	0.250611	0.12034
cg25104727	NM_207108;NM_004319	ASTN1;ASTN1	0.00318837	0.77316	0.89343	-0.120269
cg18977541			0.00132378	0.306398	0.186137	0.120261
cg20737909	NM_053005	HCCA2	0.00465502	0.622903	0.502654	0.120249
cg20181887	NM_004642	CDK2AP1	0.000647979	0.454997	0.575214	-0.120217
cg08131547	NM_001008727	ZNF121	0.00717946	0.652177	0.531962	0.120216
cg05209306	NM_003407	ZFP36	0.00120089	0.759222	0.639014	0.120208
cg00741695	NR_027116;NR_027115	LOC285768;LOC285768	0.0082544	0.544152	0.423971	0.120181
cg08614290	NM_003382	VIPR2	0.00232791	0.288904	0.409063	-0.12016
cg14389122	NM_001142443;NM_025083;NM_001142444	EDC3;EDC3;EDC3	0.00622935	0.215586	0.3357	-0.120114
cg11991824			0.000701584	0.401354	0.521409	-0.120054
cg18887458			0.00539169	0.179348	0.299393	-0.120045
cg01173650	NM_198483	RUFY4	0.000447907	0.595966	0.475955	0.120011
cg11294364	NM_134444	NLRP4	0.00182573	0.896524	0.776513	0.120011
cg06816668			0.000591527	0.620925	0.74091	-0.119985
cg22937462	NM_019111	HLA-DRA	0.000238092	0.604125	0.484149	0.119976
cg09909478	NM_001159746	ABR	0.000539576	0.645636	0.52566	0.119976
cg16090330			0.00214826	0.617372	0.737342	-0.11997
cg22897141	NM_130801;NM_130803;NM_130800;NM_130799;NM_000244;NM_130804;NM_130802	MEN1;MEN1;MEN1;MEN1;MEN1;MEN1;MEN1	0.000701584	0.287882	0.167953	0.119929
cg24389054	NM_006896	HOXA7	1.40627e-05	0.664977	0.784902	-0.119925
cg15059804	NM_152493	ZNF362	0.00371664	0.447734	0.567583	-0.119849
cg27569829	NM_000633	BCL2	0.000491803	0.504955	0.38513	0.119825
cg10299976			0.0013077	0.770192	0.889887	-0.119695
cg16736279	NM_152744	SDK1	0.00049451	0.835468	0.715785	0.119684
cg26767974	NM_006037	HDAC4	5.77757e-05	0.195404	0.315081	-0.119677
cg01297670			0.00110202	0.384005	0.503649	-0.119644
cg22145512	NM_001162491;NM_001162490;NM_001012990	ARL13A;ARL13A;ARL13A	0.000591527	0.726475	0.846092	-0.119617
cg13302154	NM_000900	MGP	0.00142298	0.337417	0.456974	-0.119557
cg07216036			0.00884283	0.288821	0.169272	0.119549
cg16737517	NM_025224	ZBTB46	0.000491803	0.485916	0.366376	0.11954
cg18941322			0.00142298	0.193565	0.313092	-0.119527
cg19622623	NM_005447	RASSF9	0.000591527	0.633544	0.514109	0.119435
cg04892766			0.000775778	0.732456	0.613069	0.119387
cg21703255			0.000151703	0.694148	0.574793	0.119355
cg10108196			0.00318837	0.292862	0.173509	0.119353
cg22613968	NR_027042	MDS2	0.00501141	0.353084	0.233744	0.11934
cg10809134			0.00770052	0.205988	0.325326	-0.119338
cg14331899	NM_001161452;NM_153611;NM_001161454	CYBASC3;CYBASC3;CYBASC3	0.000491803	0.272509	0.153174	0.119335
cg16259229			0.00421442	0.354943	0.474142	-0.1192
cg16755833	NM_005993	TBCD	0.00252088	0.45462	0.573787	-0.119168
cg21396646	NM_173508	SLC35F3	0.00252088	0.784178	0.903339	-0.119161
cg13442016	NR_030169	MIR146B	0.00946756	0.509874	0.629015	-0.119141
cg08554554	NM_003224;NM_001134758	ARFRP1;ARFRP1	0.00717946	0.793617	0.674504	0.119113
cg03475509			0.00884283	0.445225	0.564297	-0.119072
cg25120326	NM_001004019;NM_001998	FBLN2;FBLN2	7.20756e-05	0.437991	0.31897	0.119022
cg15952370	NM_001002918	OR8D2	0.000117571	0.726754	0.607741	0.119013
cg17717866	NM_006734	HIVEP2	0.0066896	0.662547	0.543549	0.118999
cg06985993	NM_031478	FAM57B	0.00154733	0.348896	0.229983	0.118913
cg11447162			0.0082544	0.72704	0.845908	-0.118868
cg13745870	NM_181727;NM_001128615;NM_181727	SPATA12;ARHGEF3;SPATA12	0.000925989	0.653784	0.772636	-0.118851
cg14230378	NR_027766;NR_002949	NUDT16P;NUDT16P	2.29128e-05	0.31251	0.431304	-0.118794
cg04352495			4.53949e-05	0.768704	0.649922	0.118782
cg16179938	NM_006162;NM_172388;NM_172389;NM_172387	NFATC1;NFATC1;NFATC1;NFATC1	0.00377445	0.290315	0.171559	0.118756
cg14686042			0.00198112	0.922306	0.803557	0.118749
cg25103337	NM_004285	H6PD	0.00198112	0.666426	0.785122	-0.118695
cg26537280	NM_001128142;NM_015485	RWDD3;RWDD3	0.00371664	0.471492	0.590185	-0.118693
cg14832904	NM_006794;NM_001164165;NM_006794	GPR75;LOC100302652;GPR75	0.00272801	0.707197	0.825869	-0.118672
cg04272820	NM_003250;NM_199334	THRA;THRA	0.00371664	0.468397	0.587047	-0.11865
cg02460141	NR_003713	LOC728613	0.00182573	0.342395	0.223748	0.118647
cg03852551	NM_001145121	TCP10L2	0.00717946	0.365177	0.246658	0.118519
cg00018181	NM_020979	SH2B2	0.00371664	0.37173	0.253233	0.118497
cg23337647	NR_024005;NR_024004	MGC13005;MGC13005	0.00616239	0.535451	0.416955	0.118495
cg04014328	NM_024015	HOXB4	2.29128e-05	0.705277	0.823708	-0.118431
cg23570810	NM_003641	IFITM1	0.00884283	0.577729	0.696144	-0.118414
cg09944626			0.00432125	0.666294	0.547894	0.1184
cg18191547			7.2074e-05	0.902587	0.784209	0.118378
cg16378133			0.0013077	0.710868	0.592519	0.118349
cg11961237	NM_001082537;NM_024549;NM_001082538	TCTN1;TCTN1;TCTN1	0.00884283	0.521106	0.402767	0.118339
cg00055073			0.000847879	0.383645	0.501974	-0.11833
cg22158248	NM_000690	ALDH2	0.00272801	0.449373	0.331071	0.118302
cg01572652	NM_001099336;NM_198521	C12orf42;C12orf42	0.0082544	0.497319	0.615598	-0.118279
cg21920560	NM_001134395;NM_032350;NM_001134396	C7orf50;C7orf50;C7orf50	0.00172636	0.501583	0.383307	0.118276
cg00603418	NR_027020	NCRNA00164	0.00110202	0.720801	0.83906	-0.118259
cg02753027	NM_001014832;NM_001014834;NM_005884;NM_001014831;NM_001014835	PAK4;PAK4;PAK4;PAK4;PAK4	0.00168136	0.48826	0.370035	0.118225
cg22216952			0.00884283	0.707674	0.82589	-0.118216
cg08558886			0.00252088	0.725733	0.843946	-0.118212
cg00469814			0.000675633	0.354619	0.47283	-0.118211
cg20539142	NM_004198	CHRNA6	0.00488071	0.36233	0.24422	0.11811
cg24831140			0.00252088	0.722639	0.604551	0.118088
cg01902845	NM_002763	PROX1	2.29128e-05	0.658734	0.776791	-0.118057
cg02228675	NM_024119	DHX58	0.0029502	0.376909	0.259006	0.117903
cg05935184	NM_052905	FMNL2	0.000647979	0.553373	0.435519	0.117854
cg04688815	NR_029379	LOC100132163	7.2074e-05	0.712543	0.830389	-0.117846
cg03822267	NM_004556	NFKBIE	0.00182573	0.593193	0.475431	0.117762
cg10327756	NM_001130705;NM_001130703;NM_014269;NM_001130704	ADAM29;ADAM29;ADAM29;ADAM29	0.00182573	0.495767	0.378047	0.11772
cg02737554			0.00400884	0.746897	0.629183	0.117714
cg08235864	NM_033267;NM_001134222;NM_178569	IRX2;IRX2;C5orf38	0.000407605	0.0992927	0.216999	-0.117707
cg26534493			0.000539576	0.505344	0.387663	0.117682
cg07632946	NM_139199;NM_001164326;NM_006696;NM_005733	BRD8;BRD8;BRD8;KIF20A	0.00318837	0.503764	0.38611	0.117654
cg08595592			0.00501141	0.749448	0.631823	0.117625
cg19537511	NM_173728	ARHGEF15	0.000205893	0.589718	0.70729	-0.117572
cg24956176			0.00717946	0.555402	0.437842	0.117561
cg03122532	NM_002243;NM_170736;NM_170737	KCNJ15;KCNJ15;KCNJ15	0.00182573	0.581407	0.463868	0.117539
cg16804948	NM_198047;NM_014362	HIBCH;HIBCH	0.00389803	0.537512	0.419994	0.117518
cg09137533			0.00198112	0.397276	0.514721	-0.117445
cg13760683	NR_026958	LOC284749	0.000709274	0.509928	0.392557	0.117371
cg22978477	NM_032427	MAML2	0.00168136	0.618593	0.735955	-0.117362
cg21376148	NM_003802	MYH13	0.0013077	0.409146	0.291793	0.117353
cg25099065	NM_001153	ANXA4	0.00154733	0.134528	0.251865	-0.117336
cg05047521			0.000227564	0.867042	0.749822	0.117221
cg16074643	NM_152729	NT5DC1	3.26654e-05	0.553615	0.436395	0.11722
cg00995520	NM_002232	KCNA3	0.000539576	0.64893	0.766146	-0.117216
cg14997702	NM_006446	SLCO1B1	0.00252088	0.415437	0.53265	-0.117212
cg01682111	NM_023076	UNKL	0.00421442	0.550174	0.432976	0.117198
cg02389252	NM_001024372;NR_027071;NM_024812	BAALC;C8orf56;BAALC	0.00400884	0.682572	0.799763	-0.117192
cg21794419	NM_015078;NM_032047	MCF2L2;B3GNT5	0.0066896	0.623475	0.740664	-0.117189
cg26530341	NM_003844	TNFRSF10A	0.00252088	0.673384	0.55621	0.117174
cg10287970	NM_001003700;NM_001003699;NM_001168344;NM_001003698	RREB1;RREB1;RREB1;RREB1	0.0057972	0.33675	0.453919	-0.117169
cg03481855	NR_003367	PVT1	0.00182573	0.537299	0.420166	0.117133
cg03389720	NM_020686	ABAT	0.0057972	0.488362	0.371327	0.117035
cg20545458			0.000186125	0.440594	0.323597	0.116997
cg14905514			0.00622935	0.291832	0.40882	-0.116988
cg24956866	NM_004342;NM_033157;NM_033138	CALD1;CALD1;CALD1	0.00252088	0.448149	0.565105	-0.116957
cg16266492	NM_001143763;NM_130784;NM_001143764	SYCE1;SYCE1;SYCE1	0.00168136	0.679682	0.796582	-0.116899
cg00767069			0.000136777	0.444744	0.327858	0.116885
cg21151963	NM_002121	HLA-DPB1	0.00182573	0.610651	0.493794	0.116857
cg21963583	NM_181514;NM_181515	MRPL21;MRPL21	0.0066896	0.623036	0.73988	-0.116844
cg24479552	NM_005303	FFAR1	0.000925989	0.804648	0.687836	0.116812
cg19495650	NM_032776	JMJD1C	0.00539169	0.644291	0.761087	-0.116797
cg19777853	NM_145345;NM_001803	UBXN11;CD52	0.00432125	0.59588	0.479085	0.116795
cg10877315			4.43777e-06	0.587902	0.471123	0.116779
cg14219900			0.000399377	0.533981	0.417226	0.116755
cg21034183	NM_001024843	TNRC6B	9.97036e-05	0.438971	0.322308	0.116664
cg12031863	NM_013399	C16orf5	0.000336738	0.309801	0.426464	-0.116662
cg14443606			1.92853e-05	0.51494	0.398284	0.116657
cg21242918	NM_199131;NM_001112704	VAX1;VAX1	0.000168109	0.251299	0.367942	-0.116643
cg25262528	NM_002526	NT5E	0.0057972	0.251414	0.368011	-0.116597
cg00127487			0.00622935	0.338566	0.455156	-0.116591
cg11475454	NM_001135167;NM_000691;NM_001135168;NM_001135167	ALDH3A1;ALDH3A1;ALDH3A1;ALDH3A1	0.00154733	0.627749	0.744317	-0.116568
cg07543883	NM_031917;NM_031917	ANGPTL6;ANGPTL6	0.00240465	0.529793	0.413287	0.116506
cg24213248	NM_014914;NM_001037131	AGAP1;AGAP1	0.00886199	0.546635	0.430139	0.116496
cg07602659	NM_005993	TBCD	0.0013077	0.324164	0.440593	-0.116429
cg02879122	NM_014695	CCDC144A	0.00717946	0.718643	0.835051	-0.116407
cg16478536	NM_002460	IRF4	0.000847879	0.386283	0.502583	-0.116299
cg17201542	NM_006810;NR_028444	PDIA5;PDIA5	0.0029502	0.623552	0.739828	-0.116276
cg17985646	NM_001166220;NM_001077653	TBX20;TBX20	0.00946756	0.158985	0.275255	-0.11627
cg03726357			0.00214826	0.474641	0.358373	0.116268
cg14195249			0.00344351	0.701194	0.817458	-0.116264
cg22796704	NM_021226	ARHGAP22	0.00110202	0.665212	0.781437	-0.116225
cg09279949	NM_000361;NM_000361	THBD;THBD	0.000251303	0.202954	0.319122	-0.116168
cg22843803			9.63457e-06	0.349776	0.233608	0.116167
cg19641804	NM_001127322;NM_001127321;NM_001127322;NM_012117	CBX5;CBX5;CBX5;CBX5	0.00344351	0.444289	0.560454	-0.116165
cg06496546	NM_002780;NM_213633	PSG4;PSG4	8.09065e-05	0.416521	0.300412	0.116108
cg18362003	NR_024430	LOC399959	0.000539576	0.788421	0.672321	0.116101
cg13912224			0.000775778	0.557996	0.674081	-0.116085
cg19132462	NM_001025389;NM_001025390;NM_000480	AMPD3;AMPD3;AMPD3	0.00214826	0.569	0.452947	0.116053
cg08190125			0.000251303	0.687427	0.571376	0.116051
cg16299091	NM_020412;NM_001142339;NM_182978;NM_002071	CHMP1B;GNAL;GNAL;GNAL	0.00101055	0.419511	0.303467	0.116044
cg13066111			5.07198e-05	0.779268	0.663247	0.116021
cg22116041	NM_152680	TMEM154	8.03836e-05	0.2836	0.167584	0.116016
cg23261171	NM_016248	AKAP11	0.00622935	0.459743	0.343782	0.115961
cg19676182	NM_173463;NM_173463	CCDC149;CCDC149	0.00501141	0.349767	0.46571	-0.115943
cg27084712			0.00622935	0.726427	0.84233	-0.115903
cg26995224	NM_032590;NM_001005366	KDM2B;KDM2B	0.00465502	0.575629	0.45982	0.115809
cg17039645	NM_006781	C6orf10	0.000775778	0.693497	0.809288	-0.115791
cg04289069	NM_001033855;NM_001033857;NM_022487;NM_001033858	DCLRE1C;DCLRE1C;DCLRE1C;DCLRE1C	0.000925989	0.399204	0.283421	0.115783
cg17367616	NM_020183	ARNTL2	0.000277283	0.357411	0.241682	0.115729
cg16786808	NM_004438	EPHA4	0.0029502	0.519073	0.634768	-0.115695
cg00088079	NM_001128164;NM_000332	ATXN1;ATXN1	0.00465502	0.810101	0.694413	0.115688
cg02587648	NM_002744;NM_001033581	PRKCZ;PRKCZ	0.000370631	0.337932	0.222332	0.1156
cg15358372	NM_033500;NM_000188;NM_033498;NM_033497;NM_033496	HK1;HK1;HK1;HK1;HK1	2.90545e-05	0.424434	0.308835	0.115599
cg06105555	NR_015410	FLJ22536	0.00142298	0.757761	0.642176	0.115585
cg08987251	NM_002080	GOT2	0.00272801	0.375378	0.490944	-0.115566
cg10796022			0.000136777	0.83291	0.717359	0.115552
cg10639435	NM_001109689;NM_021061	ZNF250;ZNF250	0.00432125	0.490678	0.375138	0.11554
cg07005924			0.00182573	0.561657	0.446127	0.11553
cg01285926			0.00110202	0.619589	0.735095	-0.115506
cg16103159			0.0029502	0.552979	0.437532	0.115446
cg09337852	NM_033157;NM_033157;NM_033138;NM_004342;NM_004342;NM_033138	CALD1;CALD1;CALD1;CALD1;CALD1;CALD1	0.000336738	0.748522	0.863868	-0.115346
cg11020333	NM_007353	GNA12	0.0013077	0.5155	0.400156	0.115344
cg07834069	NM_174892	CD300LB	0.00318837	0.426578	0.311276	0.115301
cg11089117	NM_033632	FBXW7	0.00272801	0.739977	0.624683	0.115294
cg21238609	NM_000964	RARA	0.00101055	0.713535	0.828811	-0.115276
cg04781339			0.000770054	0.41451	0.299246	0.115264
cg15840985	NM_001137674;NM_017784	ZNF860;OSBPL10	0.000775778	0.335406	0.220158	0.115247
cg25675800	NM_198445	RINL	0.000647979	0.385957	0.270739	0.115219
cg23318538	NR_026793	C10orf50	0.00318837	0.458216	0.343005	0.115211
cg00088688			0.00198112	0.706594	0.821755	-0.115161
cg07556261	NM_080627;NM_199181	C20orf117;C20orf117	0.00110202	0.397273	0.512405	-0.115132
cg01489441	NM_001040439;NM_015133	MAPK8IP3;MAPK8IP3	0.00344351	0.303787	0.188693	0.115094
cg06797253			0.00432125	0.451538	0.336459	0.115079
cg21368063	NM_001166240;NM_001166239;NM_006569	CGREF1;CGREF1;CGREF1	0.00214826	0.515954	0.400885	0.115069
cg14909730	NM_001042425;NM_003220	TFAP2A;TFAP2A	0.00245962	0.314196	0.429263	-0.115066
cg19851222			0.000775778	0.657015	0.772074	-0.115058
cg16617366	NM_001142397;NM_014772	KIAA0427;KIAA0427	0.00182573	0.688725	0.803694	-0.114968
cg05399330	NM_057176	BSND	0.000151703	0.638524	0.523559	0.114965
cg05961700	NM_005771;NM_001142271;NM_199204;NM_001142270	DHRS9;DHRS9;DHRS9;DHRS9	0.00272801	0.488497	0.373746	0.114752
cg03672272			0.0013077	0.585541	0.700286	-0.114745
cg22571544	NM_178140	PDZD2	0.000136777	0.555826	0.441086	0.11474
cg03218396			0.00432125	0.277512	0.392246	-0.114735
cg14376467	NM_001025616;NM_001042669;NM_031305	ARHGAP24;ARHGAP24;ARHGAP24	0.00214826	0.240755	0.355463	-0.114708
cg01629240	NM_002146	HOXB3	3.32831e-06	0.30589	0.420563	-0.114673
cg17166262			0.00168136	0.374335	0.259685	0.11465
cg25574849	NM_004788	UBE4A	0.00501141	0.353035	0.238388	0.114647
cg20258249			0.00371664	0.745289	0.859909	-0.11462
cg09644952	NM_006889;NM_175862	CD86;CD86	0.00400884	0.431315	0.316732	0.114583
cg00965578	NM_145641;NM_145642;NM_145641;NM_145642	APOL3;APOL3;APOL3;APOL3	0.00232791	0.403394	0.288897	0.114496
cg21042032			0.00501141	0.688375	0.802866	-0.114491
cg21830849	NM_145648	SLC15A4	0.00198112	0.834723	0.72027	0.114453
cg16318728	NM_005401	PTPN14	0.000407605	0.543127	0.428676	0.114451
cg24593918	NM_002123	HLA-DQB1	0.00946756	0.183621	0.0691805	0.114441
cg01888869	NM_000887	ITGAX	0.00154733	0.439008	0.324579	0.114429
cg10003262			0.000251303	0.461377	0.346951	0.114426
cg14768256	NM_033210;NM_001134441;NM_001134442;NM_001134440	ZNF502;ZNF502;ZNF502;ZNF502	0.00109228	0.512789	0.627198	-0.114409
cg10904740			0.000925989	0.613597	0.727996	-0.114399
cg08228249	NM_013313	YPEL1	0.0082544	0.631981	0.517618	0.114362
cg18113826	NM_004847;NM_032955;NM_001623	AIF1;AIF1;AIF1	0.00179217	0.245235	0.359585	-0.11435
cg04980849	NR_033252;NM_001482	LOC145663;GATM	0.00182573	0.80412	0.689805	0.114315
cg06604249	NM_020686;NM_001127448;NM_000663;NM_001127448	ABAT;ABAT;ABAT;ABAT	0.00272801	0.682712	0.568428	0.114284
cg03546163	NM_004117;NM_001145775;NM_001145777;NM_001145776	FKBP5;FKBP5;FKBP5;FKBP5	0.00946756	0.529258	0.643519	-0.114261
cg01559770	NM_172057;NM_000238	KCNH2;KCNH2	0.00371664	0.38171	0.267481	0.114229
cg14089503	NM_025151;NM_001002814	RAB11FIP1;RAB11FIP1	0.0072662	0.558304	0.444083	0.114221
cg04195774	NM_001077654	TNFAIP8	0.000305694	0.487033	0.372851	0.114182
cg25273707			0.0029502	0.472259	0.358112	0.114147
cg19928377	NM_031849;NM_018905;NM_031411;NM_031857;NM_018910;NM_018900;NM_018909;NM_018908;NM_018902;NM_031861;NM_018901;NM_018906;NM_018907;NM_031860;NM_018911	PCDHA6;PCDHA2;PCDHA1;PCDHA9;PCDHA7;PCDHA1;PCDHA6;PCDHA5;PCDHA11;PCDHA11;PCDHA10;PCDHA3;PCDHA4;PCDHA10;PCDHA8	0.00622935	0.575918	0.69004	-0.114122
cg04142296	NM_021623	PLEKHA2	0.0066896	0.314482	0.200361	0.114121
cg16672562	NM_022462;NM_152795;NM_022462	HIF3A;HIF3A;HIF3A	0.000227564	0.724576	0.838683	-0.114107
cg02402368	NM_001118888;NM_001147;NM_001118887;NM_001118888;NM_001147;NM_001118887;NM_024596	ANGPT2;ANGPT2;ANGPT2;ANGPT2;ANGPT2;ANGPT2;MCPH1	0.000136777	0.601459	0.715516	-0.114057
cg17652174	NM_001009905	B3GNTL1	0.00884283	0.399673	0.285658	0.114016
cg13378649			0.00501141	0.412322	0.526314	-0.113992
cg01881287			0.000168109	0.829965	0.943952	-0.113987
cg02474116	NM_017607	PPP1R12C	0.000136777	0.80881	0.694863	0.113947
cg00970057	NM_024503;NM_001127714	HIVEP3;HIVEP3	0.00501141	0.388355	0.274411	0.113945
cg15490784	NM_014079	KLF15	0.00622935	0.32736	0.213416	0.113943
cg10690467	NM_152439;NM_032735	BEST3;BEST3	0.00432125	0.815986	0.702075	0.113911
cg18973628			0.0057972	0.709399	0.823288	-0.113889
cg06430772	NM_014914;NM_001037131	AGAP1;AGAP1	0.00344351	0.706453	0.592677	0.113776
cg15058645	NM_001077269	WIPF1	0.00232791	0.403358	0.517132	-0.113774
cg02824980	NM_023944	CYP4F12	0.000709274	0.482922	0.369155	0.113767
cg00864012	NM_018469	TEX2	0.00344351	0.491198	0.377434	0.113764
cg04988219			0.00432125	0.525296	0.639055	-0.113759
cg17158584	NM_001328;NM_001012614	CTBP1;CTBP1	0.00708674	0.47152	0.357796	0.113724
cg13424029			2.58154e-05	0.492381	0.606103	-0.113723
cg12184221	NM_018266	TMEM39A	0.00142298	0.484296	0.370629	0.113667
cg24038764	NR_027131	CXorf42	2.90545e-05	0.316669	0.203008	0.113661
cg27584546	NM_001170766;NM_001170765;NM_032440	LCOR;LCOR;LCOR	0.00400884	0.508924	0.395265	0.113658
cg27064708	NM_133509	RAD51L1	0.00198112	0.452117	0.56577	-0.113653
cg26982447	NM_001004441	ANKRD34B	0.00261093	0.784779	0.671133	0.113646
cg26958838			0.000847879	0.654167	0.767797	-0.113629
cg24401487	NM_004481	GALNT2	0.000336738	0.354078	0.467687	-0.113609
cg23985374	NM_031849;NM_018905;NM_031411;NM_031857;NM_018910;NM_018900;NM_018909;NM_018908;NM_018901;NM_018906;NM_018907;NM_031860;NM_018911	PCDHA6;PCDHA2;PCDHA1;PCDHA9;PCDHA7;PCDHA1;PCDHA6;PCDHA5;PCDHA10;PCDHA3;PCDHA4;PCDHA10;PCDHA8	0.00101055	0.681846	0.795405	-0.113559
cg12362478			0.00101055	0.330914	0.217406	0.113508
cg01938023	NM_198282	TMEM173	0.00252088	0.594516	0.707925	-0.11341
cg07048516	NM_182520	C22orf15	0.00198112	0.353711	0.467102	-0.113392
cg01285652	NM_002972	SBF1	0.000647979	0.778357	0.665007	0.113351
cg15218509	NM_021034;NM_021034	IFITM3;IFITM3	5.69161e-05	0.187179	0.300519	-0.11334
cg04815334	NM_018161	NADSYN1	0.0013077	0.664014	0.777343	-0.113329
cg00907200	NM_194312	ESPNL	0.00232791	0.770133	0.88345	-0.113317
cg08747963	NR_026867	LOC134466	0.00501141	0.643053	0.756343	-0.11329
cg11888982			0.00318837	0.684969	0.571708	0.113261
cg14959707	NM_014153;NM_014153	ZC3H7A;ZC3H7A	0.00252088	0.567459	0.454228	0.113231
cg25531857	NR_003605;NR_003606;NR_003604	C20orf199;C20orf199;C20orf199	0.00232791	0.577534	0.464359	0.113175
cg11328127	NM_001135053;NM_021805;NM_001135054	SIGIRR;SIGIRR;SIGIRR	0.0029502	0.319505	0.432678	-0.113174
cg12229979	NM_004145;NM_001130065	MYO9B;MYO9B	0.00182573	0.835599	0.722442	0.113156
cg18159646	NR_000008;NR_002560;NR_002561;NR_003098	SNORD22;SNORD31;SNORD30;SNHG1	0.000168109	0.540253	0.427133	0.11312
cg24375627	NM_014624	S100A6	0.000277283	0.536308	0.649396	-0.113088
cg05027594	NM_153365	TAPT1	0.000123209	0.694524	0.807592	-0.113068
cg07240413			0.00107314	0.840023	0.726989	0.113033
cg20359349	NR_026770	C17orf88	0.00400884	0.425466	0.312435	0.113031
cg10074506	NM_183239	GSTO2	0.00884283	0.682818	0.795842	-0.113023
cg15637765	NM_007118	TRIO	0.000251303	0.259127	0.146139	0.112988
cg26075966			0.000151703	0.559203	0.446221	0.112982
cg18254983	NM_017509;NM_138563;NM_138564	KLK15;KLK15;KLK15	0.0029502	0.800464	0.913424	-0.11296
cg16190265	NM_001164759;NM_001164762;NM_001164758;NM_001164760;NM_001164761;NM_002735	PRKAR1B;PRKAR1B;PRKAR1B;PRKAR1B;PRKAR1B;PRKAR1B	6.45615e-05	0.466646	0.353747	0.112899
cg01890417	NM_032186;NM_201269;NM_016620	ZNF644;ZNF644;ZNF644	0.0029502	0.636274	0.523386	0.112887
cg07830156			0.00252088	0.773235	0.660393	0.112842
cg11274172	NM_003369	UVRAG	0.000847879	0.245097	0.357933	-0.112836
cg09353052	NM_001165964;NM_006920;NM_001165963	SCN1A;SCN1A;SCN1A	0.00198112	0.689805	0.576971	0.112833
cg13951797	NM_032271	TRAF7	0.000647979	0.419356	0.306545	0.112811
cg10959651	NM_080657	RSAD2	3.66865e-05	0.320898	0.433657	-0.112759
cg16462291			0.000539576	0.369146	0.256389	0.112757
cg27169073			0.00198112	0.463346	0.350603	0.112744
cg01636650	NM_015873	VILL	5.16524e-05	0.261805	0.149074	0.112731
cg16098726	NM_000174	GP9	0.00946756	0.310474	0.423199	-0.112725
cg26521448	NM_014153	ZC3H7A	0.00400884	0.655651	0.542927	0.112724
cg24711774			0.00884283	0.715965	0.828688	-0.112723
cg18406700	NM_153711;NM_001139444	FAM26E;BET3L	0.000205893	0.699679	0.58697	0.112709
cg13995230	NR_030390;NR_030157;NR_029868;NR_030266;NR_029861	MIR654;MIR376B;MIR376A1;MIR376A2;MIR376C	0.000775778	0.569724	0.457041	0.112684
cg01147727	NM_015005;NM_001112726	KIAA0284;KIAA0284	0.000591527	0.83018	0.717508	0.112673
cg00169122	NM_013275	ANKRD11	0.00154733	0.454921	0.34225	0.112671
cg03717994			0.00168136	0.685984	0.573347	0.112637
cg05516505			0.00400884	0.377547	0.264921	0.112626
cg11907323			0.00622935	0.805554	0.692958	0.112596
cg25631489	NM_024947	PHC3	0.000227564	0.379049	0.266558	0.112492
cg05891849	NM_001010855	PIK3R6	0.000136777	0.363946	0.251455	0.11249
cg26121053			0.00272801	0.343219	0.230754	0.112465
cg25382573	NM_001037671;NM_001037671	C12orf74;C12orf74	0.00432125	0.713277	0.600821	0.112456
cg10872209	NM_178858;NM_004311	SFXN2;ARL3	0.000591527	0.371922	0.259479	0.112443
cg13292703	NM_002531	NTSR1	0.00344351	0.515454	0.403015	0.11244
cg01374885	NR_030235	MIR508	0.000136777	0.478501	0.366076	0.112425
cg17312546			0.000407605	0.648354	0.536025	0.112329
cg20190772	NM_001080394	KIAA0146	0.000647979	0.520717	0.633029	-0.112313
cg19978416			0.00272801	0.464253	0.352009	0.112244
cg10800620			0.00465502	0.548235	0.435996	0.112239
cg17372758	NM_015947;NM_173473	ASCC1;C10orf104	0.000277283	0.773672	0.661473	0.112199
cg06085579	NM_001130081;NM_002662	PLD1;PLD1	0.0029502	0.349905	0.23771	0.112195
cg05011526	NM_015055	SWAP70	8.47324e-06	0.824473	0.712306	0.112167
cg18623836	NM_001034;NM_001165931	RRM2;RRM2	0.00491617	0.744594	0.632429	0.112165
cg22900266			0.0013077	0.402607	0.290494	0.112113
cg09465703	NM_001005920	JMJD8	0.0029502	0.373598	0.261503	0.112095
cg22301418	NM_015205;NM_032189	ATP11A;ATP11A	0.00987362	0.466318	0.35424	0.112078
cg04399899	NM_014247;NM_014247	RAPGEF2;RAPGEF2	0.000591527	0.701766	0.58971	0.112055
cg13842556	NM_017551	GRID1	0.00884283	0.674029	0.786055	-0.112025
cg01277542	NM_001043	SLC6A2	4.6132e-05	0.121169	0.233175	-0.112006
cg07504763			0.000591527	0.494962	0.606955	-0.111993
cg21655448	NR_003948	HCG22	0.00717946	0.440043	0.328065	0.111977
cg17332198	NM_006576	AVIL	0.00232791	0.644147	0.75611	-0.111963
cg03737080	NM_201398;NM_025207	FLAD1;FLAD1	3.26654e-05	0.311842	0.199935	0.111907
cg12955789	NM_175062	RASGEF1C	0.000447907	0.660427	0.772326	-0.111899
cg11668917	NR_028374;NM_002539	SNORA80B;ODC1	0.000591527	0.425529	0.313636	0.111894
cg07375836	NM_198839;NM_198834	ACACA;ACACA	0.000709274	0.65804	0.769924	-0.111884
cg23664396			0.0057972	0.718334	0.830155	-0.111821
cg07205823			0.00240465	0.564628	0.45282	0.111808
cg10775000			0.00198112	0.727576	0.615783	0.111792
cg07939445	NM_003309;NM_001080976	TSPYL1;DSE	5.16524e-05	0.665409	0.777184	-0.111775
cg15651928	NM_183397;NM_007238	PXMP4;PXMP4	0.00252088	0.600863	0.712614	-0.111752
cg01091565	NM_018670	MESP1	0.00371664	0.845147	0.733441	0.111706
cg13758331	NM_006538;NM_138621	BCL2L11;BCL2L11	9.97036e-05	0.373377	0.485044	-0.111667
cg07219303	NM_001102470;NM_000672	ADH6;ADH6	0.00318837	0.618724	0.507078	0.111647
cg05930586			0.000925989	0.644239	0.532625	0.111614
cg11105610	NM_005567	LGALS3BP	0.000407605	0.684836	0.796447	-0.111611
cg01593673	NM_002146	HOXB3	0.000539576	0.315257	0.426866	-0.111609
cg00186909	NM_001004330	PLEKHG7	0.000186125	0.612671	0.724256	-0.111585
cg04741094			0.000491803	0.816093	0.704532	0.111561
cg07127410	NM_032173	ZNRF3	0.000925989	0.754569	0.866066	-0.111496
cg04995717	NM_000459;NM_000459	TEK;TEK	0.0082544	0.402953	0.514449	-0.111496
cg16340767			0.00344351	0.452602	0.564094	-0.111492
cg08966619			0.0057972	0.477666	0.589141	-0.111475
cg20558112	NM_001010875	SLC25A30	0.00400884	0.505586	0.617057	-0.11147
cg26123647	NM_015025	MYT1L	0.00168136	0.40462	0.29317	0.11145
cg23016776	NM_005479;NM_005479	FRAT1;FRAT1	0.00232791	0.451908	0.563352	-0.111444
cg03015498			0.000775778	0.504243	0.615674	-0.111431
cg22714811			0.00182573	0.743321	0.854748	-0.111427
cg11586034	NM_007259	VPS45	0.00371664	0.326526	0.437946	-0.111421
cg16189091			0.00142298	0.624014	0.735409	-0.111395
cg22627753	NM_198576	AGRN	0.000186125	0.859084	0.747718	0.111366
cg12065616			0.0013077	0.489026	0.377675	0.111351
cg08815110	NM_014960	ARSG	0.00198112	0.644578	0.533232	0.111346
cg04555665	NM_030815	PDRG1	0.00252088	0.686005	0.574671	0.111335
cg26244575			0.00539169	0.47774	0.366409	0.111332
cg19577080	NM_001101669;NM_003866	INPP4B;INPP4B	0.00252088	0.512887	0.401562	0.111326
cg18637380	NM_005956	MTHFD1	0.00465502	0.807947	0.696624	0.111324
cg03417975			0.00539169	0.803318	0.691995	0.111324
cg14834925			0.00539169	0.366242	0.477564	-0.111323
cg26588061	NM_015542;NM_080599	UPF2;UPF2	0.00182573	0.551578	0.440261	0.111316
cg15097489			0.00101055	0.496098	0.384816	0.111282
cg07239897			0.00252088	0.754338	0.865605	-0.111266
cg13878360			0.00539169	0.26944	0.380665	-0.111225
cg21723559	NM_015937	PIGT	0.00182573	0.492883	0.381692	0.111191
cg24861859	NM_003285	TNR	0.00182573	0.700142	0.811283	-0.111141
cg08267399	NR_024441	LOC731779	0.00272801	0.445989	0.334873	0.111116
cg07285983	NM_014857;NM_001035230	RABGAP1L;RABGAP1L	0.00101055	0.58967	0.70074	-0.111071
cg26888012	NM_014068	PSORS1C1	0.00400884	0.565078	0.454067	0.11101
cg19421346	NM_001003656;NR_033191;NM_018461	PPP2R2D;PPP2R2D;PPP2R2D	0.00168136	0.667056	0.778062	-0.111006
cg08748033	NM_001166373	MARCH1	0.00142298	0.597189	0.48621	0.110979
cg17320378	NM_173544	FAM129C	0.000925989	0.671053	0.78197	-0.110917
cg19139729	NM_003167;NM_003167	SULT2A1;SULT2A1	0.00501141	0.67895	0.789788	-0.110839
cg04972979	NM_033409;NM_033409	C20orf54;C20orf54	0.00168136	0.438982	0.54982	-0.110838
cg18990407	NM_004443	EPHB3	0.00188536	0.792484	0.681679	0.110805
cg24037651	NM_145003	TSNARE1	0.00539169	0.664555	0.553861	0.110695
cg05316065	NM_031415;NM_031415	GSDMC;GSDMC	0.00344351	0.554453	0.443761	0.110692
cg00379720			0.000925989	0.355942	0.466618	-0.110676
cg25031824	NM_002558	P2RX1	0.00539169	0.393162	0.503837	-0.110675
cg25885716	NM_000868	HTR2C	0.00318837	0.646496	0.75717	-0.110675
cg01215061	NM_138960;NM_138960	TGIF2LX;TGIF2LX	0.000707747	0.701803	0.812465	-0.110662
cg23753006			0.00272801	0.663526	0.552893	0.110633
cg22745747	NM_203281	BMX	0.00142298	0.668808	0.779435	-0.110627
cg11177526	NM_198930;NM_198929;NM_152501;NM_198928	PYHIN1;PYHIN1;PYHIN1;PYHIN1	0.000479394	0.562076	0.451513	0.110564
cg04596842			0.00142298	0.642573	0.753122	-0.110549
cg08885224	NM_172105;NM_172103;NM_004100	EYA4;EYA4;EYA4	0.00432125	0.53346	0.644007	-0.110548
cg18077971	NM_013942;NM_000438;NM_181460;NM_181457;NM_181458;NM_153038;NM_181461;NM_001127366;NM_181459	PAX3;PAX3;PAX3;PAX3;PAX3;CCDC140;PAX3;PAX3;PAX3	0.00770052	0.206708	0.317255	-0.110547
cg03340754	NM_018938	PCDHB4	0.00432125	0.474179	0.584721	-0.110542
cg25491558			0.00232791	0.188999	0.299535	-0.110536
cg12156154	NM_000044	AR	0.00539169	0.753003	0.863524	-0.110521
cg00374016			0.00344351	0.377396	0.487907	-0.110511
cg10216414	NM_017546	C2orf29	0.0082544	0.4497	0.339189	0.11051
cg24774357			0.000110886	0.286703	0.397155	-0.110452
cg25038311			0.00110202	0.717945	0.607504	0.110441
cg08252303	NM_001161352;NM_002247;NM_001161353;NM_001014797	KCNMA1;KCNMA1;KCNMA1;KCNMA1	0.000925989	0.77398	0.663559	0.110421
cg09735627			0.00110202	0.70025	0.810664	-0.110414
cg03344031	NM_001077186;NM_001145809;NM_024729	MYH14;MYH14;MYH14	0.00214826	0.48082	0.591228	-0.110408
cg10287321			0.000491803	0.662876	0.552488	0.110388
cg21284779	NM_181885	RXFP4	0.00120089	0.335933	0.446269	-0.110335
cg00376544	NM_153230	FBXO39	0.000775778	0.235547	0.345856	-0.110309
cg19860691	NM_001042537;NM_006359	SLC9A6;SLC9A6	0.00101055	0.58971	0.699997	-0.110287
cg07680505			0.000205893	0.644452	0.534175	0.110278
cg08879544			0.00717946	0.632172	0.742437	-0.110265
cg01194336	NM_001142523;NM_007199	IRAK3;IRAK3	0.00168136	0.684133	0.573911	0.110222
cg20824200			1.24118e-05	0.480832	0.370611	0.110221
cg13603599	NM_003977	AIP	0.0066896	0.864112	0.753892	0.110219
cg18900669	NM_001040059;NM_001251	CD68;CD68	0.00198112	0.454224	0.344006	0.110218
cg16257607	NM_000984;NR_000014;NR_000009	RPL23A;SNORD42A;SNORD4B	3.26654e-05	0.760869	0.650654	0.110215
cg07482257			8.95659e-05	0.659931	0.770132	-0.110202
cg00150874	NM_001123384;NM_001123383	BCOR;BCOR	0.000110886	0.550015	0.66017	-0.110155
cg08870893	NM_001025357	C8orf85	0.0013077	0.566788	0.456635	0.110154
cg26332926	NM_001098512;NM_006258	PRKG1;PRKG1	0.00884283	0.151556	0.261697	-0.110141
cg18406852	NM_004854	CHST10	0.00360288	0.409926	0.299804	0.110122
cg13305951	NM_007148;NM_007148	RNF112;RNF112	0.000227564	0.563675	0.673788	-0.110113
cg24624505			0.00455336	0.696395	0.806503	-0.110108
cg22835851	NM_020945	WDFY4	0.000305694	0.416744	0.30664	0.110104
cg19215110	NM_001954;NM_013993	DDR1;DDR1	0.000638675	0.587263	0.477171	0.110092
cg20862097	NM_015345	DAAM2	0.00465502	0.515994	0.626063	-0.110069
cg06453916	NM_014298	QPRT	0.00371664	0.24801	0.358078	-0.110068
cg16710042	NM_173512	SLC38A11	0.000847879	0.356557	0.466614	-0.110056
cg08469255	NM_001954;NM_013993	DDR1;DDR1	8.03836e-05	0.39036	0.280316	0.110044
cg21543918	NM_020464;NM_020464	NHSL1;NHSL1	0.000539576	0.704087	0.814125	-0.110038
cg19735804			0.00142298	0.240496	0.350522	-0.110026
cg16112945	NR_024514;NM_139025;NM_139027;NM_139026	ADAMTS13;ADAMTS13;ADAMTS13;ADAMTS13	0.00198112	0.330776	0.220817	0.109959
cg25574603	NM_001080554;NM_001080555	GSG1;GSG1	0.000370631	0.356382	0.246482	0.1099
cg24251850	NM_001142633;NM_014308	PIK3R5;PIK3R5	0.0029502	0.343992	0.234092	0.1099
cg03281139	NM_005597;NM_205843	NFIC;NFIC	0.000775778	0.646157	0.536302	0.109855
cg05684200			9.63457e-06	0.831155	0.940997	-0.109842
cg06048354	NM_018938	PCDHB4	8.03836e-05	0.411422	0.521263	-0.10984
cg27576271	NM_001037671	C12orf74	0.00432125	0.65349	0.543672	0.109818
cg24301247	NM_145648	SLC15A4	5.00641e-06	0.617791	0.507987	0.109805
cg15362155	NM_206998;NM_206998	SCGB1D4;SCGB1D4	0.0082544	0.536539	0.42675	0.109789
cg14138235			0.00318837	0.46309	0.572853	-0.109762
cg05403316			0.00622935	0.266274	0.376011	-0.109738
cg25371036	NM_130847	AMOTL1	0.000925989	0.587804	0.697526	-0.109722
cg15531512			0.00400884	0.666383	0.776086	-0.109703
cg07890238	NM_001080826	PRAGMIN	0.00717946	0.827019	0.717331	0.109688
cg07772904			0.0032147	0.627268	0.517587	0.109681
cg12743248	NM_024593;NM_001142857;NR_024605	EFCAB1;EFCAB1;EFCAB1	0.00142298	0.596972	0.48732	0.109652
cg10981439	NM_018643;NM_018643	TREM1;TREM1	0.000227564	0.735951	0.845588	-0.109637
cg05496814			0.000227564	0.505075	0.395453	0.109622
cg05626226	NM_017700	FLJ20184	0.00272801	0.476787	0.367179	0.109608
cg16611352	NM_002558	P2RX1	0.00884283	0.235854	0.345411	-0.109557
cg11884704	NM_001006641;NM_001006642	SLC25A25;SLC25A25	0.000447907	0.740016	0.849557	-0.109541
cg22078805	NM_198475	FAM171A2	0.00400884	0.484006	0.374465	0.10954
cg24032691	NM_144575	CAPN13	0.00465502	0.465393	0.355875	0.109518
cg06173889	NM_003108;NM_003108	SOX11;SOX11	0.000205893	0.424772	0.534241	-0.109469
cg17251713	NM_003784;NM_001040147	SERPINB7;SERPINB7	0.00465502	0.480811	0.371346	0.109465
cg15418419	NM_006120	HLA-DMA	0.0029502	0.83119	0.721728	0.109462
cg20927567	NM_000984;NR_000014;NR_000009;NR_000010	RPL23A;SNORD42A;SNORD4B;SNORD4A	0.00272801	0.598911	0.489504	0.109407
cg13100137			0.000847879	0.414902	0.524278	-0.109376
cg11145826	NM_198527;NM_001039675;NM_018671	HDDC3;UNC45A;UNC45A	0.00770052	0.50644	0.397065	0.109374
cg16253634	NM_004342;NM_033157;NM_033138	CALD1;CALD1;CALD1	0.00154733	0.516497	0.625863	-0.109366
cg27162435	NM_004732	KCNAB3	0.00951137	0.821583	0.712218	0.109365
cg25940517	NM_138451	IQCD	0.00622935	0.174619	0.283962	-0.109343
cg18898632			0.00770052	0.778765	0.888107	-0.109342
cg21418052	NM_194318	B3GALTL	0.000591527	0.423119	0.313781	0.109337
cg15704219	NM_017782	C10orf18	0.000709274	0.326524	0.217217	0.109307
cg11356004	NM_001447	FAT2	0.00360288	0.547225	0.43792	0.109304
cg20559537	NM_015111	N4BP3	0.00432125	0.4125	0.303211	0.10929
cg22858525			0.00174246	0.523513	0.414238	0.109275
cg26048333	NM_007118	TRIO	0.000227564	0.610323	0.501063	0.10926
cg24215812			0.00946756	0.4923	0.383047	0.109253
cg23786205			0.00501142	0.628611	0.519365	0.109246
cg15444358			0.00154733	0.414399	0.305201	0.109198
cg14018172	NM_004726;NM_001080975	REPS2;REPS2	0.000847879	0.65608	0.765241	-0.109162
cg09355528	NM_080798;NM_080809;NM_080800;NM_080811;NM_080810;NM_080799;NM_080813;NM_005203;NM_080815;NM_080807;NM_080801;NM_080808;NM_080814;NM_080802;NM_080812;NM_080805;NM_080806;NM_080804;NM_080803;NM_001130103	COL13A1;COL13A1;COL13A1;COL13A1;COL13A1;COL13A1;COL13A1;COL13A1;COL13A1;COL13A1;COL13A1;COL13A1;COL13A1;COL13A1;COL13A1;COL13A1;COL13A1;COL13A1;COL13A1;COL13A1	0.000447907	0.660742	0.551637	0.109105
cg06442199	NM_207189	BRDT	0.000168109	0.620422	0.729525	-0.109104
cg03613942			0.00214826	0.553878	0.444787	0.109091
cg08141873	NM_005343;NM_176795;NM_001130442	HRAS;HRAS;HRAS	0.000186125	0.476585	0.3675	0.109086
cg06553792			0.0029502	0.609237	0.500157	0.10908
cg13787850			0.00214826	0.437438	0.328371	0.109067
cg08498747			0.000925989	0.520353	0.629401	-0.109048
cg06194960	NM_022450	RHBDF1	0.00168136	0.84381	0.734763	0.109047
cg03875678	NM_004131	GZMB	0.00432125	0.49173	0.382686	0.109043
cg03109701	NM_001109903;NM_032814;NM_024738	RNFT2;RNFT2;C12orf49	3.66865e-05	0.734716	0.625733	0.108983
cg08494738			0.00232791	0.535693	0.426771	0.108922
cg27157038	NM_004088;NM_001017520	DNTT;DNTT	0.00182573	0.503198	0.612108	-0.10891
cg15997518			0.00110202	0.723114	0.614208	0.108907
cg01231464	NM_012368	OR2C1	0.000491803	0.527493	0.418615	0.108878
cg13615971			0.00110202	0.323249	0.432118	-0.108869
cg24604013	NM_005986	SOX1	0.00120089	0.260534	0.369394	-0.10886
cg04475307	NM_001077525;NM_022485;NM_001077526	MTMR14;MTMR14;MTMR14	0.00252088	0.701406	0.592601	0.108805
cg27365701	NM_001946;NM_022652	DUSP6;DUSP6	0.00432125	0.294563	0.40333	-0.108767
cg08893575	NM_005884;NM_001014832;NM_001014835;NM_001014831;NM_001014834	PAK4;PAK4;PAK4;PAK4;PAK4	0.000151703	0.536251	0.427503	0.108748
cg08630923			0.000110886	0.337679	0.446422	-0.108744
cg00552235			0.000180543	0.292512	0.401246	-0.108735
cg27236007	NM_001139488;NM_015376;NM_170672	RASGRP3;RASGRP3;RASGRP3	0.00627526	0.404962	0.296228	0.108735
cg27639575	NM_005187	CBFA2T3	0.000775778	0.21417	0.105438	0.108732
cg01193368			0.00198112	0.713744	0.822474	-0.10873
cg12800105	NM_032590;NM_001005366	KDM2B;KDM2B	0.000925989	0.799744	0.691018	0.108726
cg23526087	NM_133509	RAD51L1	0.00501141	0.316802	0.208076	0.108726
cg21150053	NM_016279	CDH9	0.000251303	0.208816	0.317512	-0.108695
cg03167633			0.00622935	0.364455	0.473138	-0.108683
cg12807628	NM_001033017	DEFB135	0.000491803	0.394396	0.285731	0.108665
cg08551036	NM_174917;NR_023316;NM_001127214	ACSF3;ACSF3;ACSF3	0.000539576	0.755705	0.647123	0.108582
cg25031476	NM_130846;NM_002849	PTPRR;PTPRR	0.00371664	0.652781	0.76134	-0.108559
cg03792964			6.45615e-05	0.780128	0.671588	0.10854
cg20367266	NM_152278	TCEAL7	0.0029502	0.580979	0.689516	-0.108538
cg13330559	NM_207386	SHISA6	0.000925422	0.350201	0.458734	-0.108533
cg14836555			0.00432125	0.608675	0.500148	0.108527
cg06808011	NM_001145446;NM_198087;NM_003454;NM_001145447;NM_001145448;NM_198088	ZNF200;ZNF200;ZNF200;ZNF200;ZNF200;ZNF200	0.00770052	0.601362	0.709837	-0.108475
cg26899988			0.0029502	0.621443	0.51298	0.108463
cg27168131	NM_001001582;NM_001001568;NM_001001573;NM_001001567;NM_001001578;NM_002606;NM_001001580;NM_001001579;NM_001001581;NM_001001571;NM_001001584;NM_001001576;NM_001001585;NM_001001574;NM_001001572;NM_001001569;NM_001001570;NM_001001577;NM_001001583;NM_001001575	PDE9A;PDE9A;PDE9A;PDE9A;PDE9A;PDE9A;PDE9A;PDE9A;PDE9A;PDE9A;PDE9A;PDE9A;PDE9A;PDE9A;PDE9A;PDE9A;PDE9A;PDE9A;PDE9A;PDE9A	0.00272801	0.734627	0.843075	-0.108448
cg03389926			0.00154733	0.522381	0.413955	0.108427
cg24800754	NM_005934	MLLT1	0.000539576	0.272617	0.381032	-0.108415
cg11283404	NM_001556	IKBKB	0.00182573	0.618236	0.509859	0.108377
cg25423573	NM_153367	ZCCHC24	0.0029502	0.58527	0.693618	-0.108348
cg20112376	NM_001099433;NM_144720	JAKMIP1;JAKMIP1	0.000491803	0.492004	0.600341	-0.108337
cg23228178	NM_012387	PADI4	0.00182573	0.547714	0.439399	0.108314
cg16646298	NM_005803	FLOT1	0.00168136	0.596048	0.487756	0.108292
cg14528056	NR_002188	GBAP1	0.00501141	0.487675	0.379397	0.108277
cg26510178			0.00120089	0.801469	0.693205	0.108264
cg08773314	NM_001040445	ASB1	0.00182573	0.343988	0.235738	0.108251
cg16476940	NM_020979	SH2B2	0.00110202	0.708909	0.600692	0.108217
cg19930004			0.00278313	0.242897	0.351112	-0.108214
cg17951713			5.16524e-05	0.392946	0.501131	-0.108185
cg24809269	NM_182565	FAM100B	0.00432125	0.671882	0.563723	0.108159
cg17113158	NM_183404;NM_002895	RBL1;RBL1	0.000775778	0.717136	0.608995	0.108141
cg05788080	NM_033397	ITPRIP	0.00154733	0.647868	0.755964	-0.108096
cg07090813	NM_006623	PHGDH	5.72117e-06	0.306537	0.198448	0.108089
cg08271622	NR_027241;NR_002910;NR_015366	LOC388796;SNORA71B;LOC388796	2.90545e-05	0.791784	0.683716	0.108067
cg16534307	NM_182898;NM_182899;NM_182898	CREB5;CREB5;CREB5	0.0066896	0.415497	0.523559	-0.108062
cg19016062	NM_019046	ANKRD16	0.00110202	0.560953	0.452895	0.108058
cg24629663			6.52956e-06	0.633461	0.741518	-0.108057
cg07575680	NM_138368	DKFZp761E198	0.0013077	0.746995	0.85505	-0.108055
cg22352176			0.00232791	0.236638	0.128588	0.10805
cg24450239			5.77757e-05	0.709345	0.817388	-0.108042
cg05166473	NM_017869;NM_079837	BANP;BANP	0.000591527	0.666415	0.558375	0.10804
cg07081739	NM_005865	PRSS16	6.45615e-05	0.471216	0.363183	0.108032
cg02753903	NM_000540;NM_001042723	RYR1;RYR1	0.0057972	0.673411	0.781424	-0.108013
cg13959831	NM_016734	PAX5	1.5915e-05	0.689819	0.581815	0.108003
cg16814023	NM_021237	SELK	0.00491617	0.63881	0.746779	-0.107969
cg11226808	NM_005427	TP73	0.00252088	0.604315	0.496348	0.107967
cg06943385	NM_002086;NM_203506	GRB2;GRB2	0.00198112	0.891464	0.783504	0.10796
cg10323841	NM_194286	SRRM4	4.6132e-05	0.565862	0.457936	0.107927
cg24762962	NM_173667	FLJ37543	0.0013077	0.845065	0.737187	0.107878
cg12127290	NM_000415;NM_134431	IAPP;SLCO1A2	0.00400884	0.703938	0.596071	0.107867
cg08376141	NM_030651	PRRT1	0.00663553	0.31099	0.418855	-0.107865
cg22103219	NM_020979	SH2B2	0.000925989	0.234317	0.126455	0.107862
cg19720260	NM_182495;NM_182495	FAM55B;FAM55B	0.00272801	0.338803	0.230956	0.107847
cg25762679	NM_080682;NM_001078;NM_001078;NM_080682	VCAM1;VCAM1;VCAM1;VCAM1	0.00539169	0.510503	0.402682	0.107822
cg11438552	NM_016335	PRODH	0.00272801	0.311651	0.203831	0.10782
cg14652587			0.00154733	0.585255	0.693069	-0.107814
cg09179743	NM_024761;NM_020124	MOBKL2B;IFNK	0.000775778	0.839239	0.731458	0.107781
cg26312071	NM_020210	SEMA4B	0.00187028	0.740465	0.63269	0.107775
cg15811515	NR_027011	CSDAP1	0.000647979	0.237992	0.345762	-0.10777
cg05217312	NM_001098500	KIAA1217	0.00318837	0.633782	0.52602	0.107762
cg02099474	NM_017781	CYP2W1	0.0066896	0.424596	0.316841	0.107754
cg06582266	NM_001164673;NM_173660	DOK7;DOK7	0.00770052	0.572453	0.680202	-0.107749
cg01297020	NM_172370;NM_001161814;NM_001161812	DAOA;DAOA;DAOA	0.00770052	0.620553	0.512853	0.1077
cg08805241			0.00539169	0.640671	0.748349	-0.107678
cg14130459	NM_016582;NR_027391	SLC15A3;SLC15A3	0.00198112	0.565722	0.458052	0.107671
cg16699635	NM_002125	HLA-DRB5	0.00223788	0.50298	0.395314	0.107667
cg24476449	NM_014238	KSR1	0.00400884	0.435788	0.328122	0.107666
cg12758082	NM_015205;NM_032189	ATP11A;ATP11A	0.00120089	0.385131	0.492782	-0.107651
cg15417798	NM_014921;NM_001008701	LPHN1;LPHN1	0.00371664	0.234524	0.342147	-0.107623
cg05999010	NM_000333;NM_001128149	ATXN7;ATXN7	0.000709274	0.86128	0.753669	0.107611
cg06483505			0.00198112	0.80083	0.693224	0.107606
cg26558485	NM_178033;NM_178033	CYP4X1;CYP4X1	0.000305694	0.450508	0.558111	-0.107604
cg08599792			0.00318837	0.319849	0.212259	0.10759
cg17201227	NM_003569	STX7	0.000491803	0.275002	0.167414	0.107588
cg18235690	NM_015649;NM_015649	IRF2BP1;IRF2BP1	0.00465502	0.36301	0.255425	0.107585
cg09061993	NM_004619;NM_001033910	TRAF5;TRAF5	0.000925989	0.786878	0.679304	0.107574
cg25190513	NM_006018;NM_006018	GPR109B;GPR109B	0.00272801	0.788527	0.680987	0.107541
cg18616558			0.000647979	0.80878	0.701257	0.107522
cg10384725			0.00432125	0.667546	0.560051	0.107495
cg23760945	NM_032377	ELOF1	0.00168136	0.472175	0.364688	0.107487
cg02088996	NR_027118	LOC285954	0.00432125	0.619911	0.512514	0.107397
cg25249728			0.00154733	0.669286	0.561889	0.107397
cg15506609	NM_152739	HOXA9	0.000310394	0.35499	0.462374	-0.107385
cg27213238	NM_145649	GCNT2	0.00363661	0.551825	0.444443	0.107381
cg07652628	NM_000224;NM_199187	KRT18;KRT18	0.00198112	0.696116	0.803493	-0.107377
cg18520696			0.000591527	0.778749	0.67138	0.107368
cg16417374	NM_020379	MAN1C1	0.00465502	0.247995	0.355345	-0.10735
cg24681573	NM_021107;NM_033363;NM_033362	MRPS12;MRPS12;MRPS12	0.000539576	0.692755	0.585413	0.107342
cg20742389	NM_202470;NM_202468;NM_202494;NM_202467;NM_005716;NM_202469	GIPC1;GIPC1;GIPC1;GIPC1;GIPC1;GIPC1	0.00831808	0.237154	0.129832	0.107322
cg08844313	NM_000440	PDE6A	0.000123209	0.31285	0.205533	0.107316
cg04576021	NM_002120	HLA-DOB	0.000709274	0.27164	0.164327	0.107313
cg17442683	NM_012102;NM_001042681	RERE;RERE	0.00501141	0.498463	0.391186	0.107277
cg09906382	NM_006186	NR4A2	0.000227564	0.627793	0.735053	-0.10726
cg17509893	NM_012250;NM_001102669	RRAS2;RRAS2	0.00622935	0.789095	0.681876	0.107219
cg01923075			0.000305694	0.811343	0.918503	-0.10716
cg25325512	NM_002648	PIM1	0.00182573	0.36758	0.474695	-0.107116
cg13569051	NM_001127664;NM_001127667;NM_001127662;NM_198252;NM_001127665;NM_001127663;NM_001127666	GSN;GSN;GSN;GSN;GSN;GSN;GSN	0.000647979	0.532077	0.639192	-0.107115
cg24185357			0.00232791	0.326	0.433115	-0.107115
cg00168942	NM_153368;NM_153368	GJD4;GJD4	0.00539169	0.40988	0.516983	-0.107103
cg12692069			0.00245962	0.803934	0.696882	0.107052
cg00958944	NM_012316	KPNA6	0.00154733	0.759026	0.651975	0.107051
cg08371190	NR_026986;NR_026989;NR_026987;NR_026988;NR_026985	LOC339524;LOC339524;LOC339524;LOC339524;LOC339524	0.00501141	0.731399	0.838445	-0.107046
cg10609310			0.00371664	0.511579	0.404558	0.107022
cg20291162	NM_024119	DHX58	0.00884283	0.731084	0.624066	0.107018
cg11199827			0.00214826	0.460878	0.353884	0.106994
cg06632549			0.00214826	0.438832	0.331858	0.106974
cg21399778	NM_015148	PASK	0.00946756	0.50067	0.393697	0.106974
cg14844815			0.00198112	0.526802	0.419877	0.106926
cg03783907	NM_197974;NM_006994	BTN3A3;BTN3A3	0.000491803	0.328851	0.221938	0.106913
cg01227084	NM_003021	SGTA	0.00142298	0.813614	0.706712	0.106902
cg21394039	NM_198531	ATP9B	0.00120089	0.721233	0.614335	0.106898
cg18455405	NM_000332;NM_001128164	ATXN1;ATXN1	0.00332773	0.838315	0.731445	0.10687
cg23432301	NM_198451	FOXR2	3.66865e-05	0.766016	0.872883	-0.106868
cg08514311			0.00182573	0.508791	0.401933	0.106858
cg23009042	NM_006574	CSPG5	0.000847879	0.609045	0.502253	0.106792
cg04554195	NM_001005738;NM_001462	FPR2;FPR2	0.00770052	0.584104	0.477323	0.106781
cg18144692			0.00539169	0.715968	0.609195	0.106773
cg02954987	NM_002292	LAMB2	0.0082544	0.527847	0.634589	-0.106743
cg26075408			0.000277283	0.624968	0.518248	0.106719
cg03088219	NM_201591;NM_005277;NM_201592	GPM6A;GPM6A;GPM6A	0.00501141	0.567998	0.674692	-0.106694
cg04742550	NM_000887	ITGAX	0.000847879	0.44125	0.334575	0.106675
cg15549810	NM_001112802	SLC8A1	0.0066896	0.811371	0.704713	0.106658
cg26922917	NM_198827	GPR133	0.00371664	0.780012	0.886658	-0.106646
cg03720605			0.00182573	0.440721	0.334077	0.106643
cg11164649	NM_001135186;NM_016428	ABI3;ABI3	0.00439852	0.650898	0.544281	0.106617
cg01066157	NM_182961;NM_133650;NM_015293;NM_033071	SYNE1;SYNE1;SYNE1;SYNE1	0.00344351	0.805868	0.912466	-0.106598
cg20001810	NM_004693	KRT75	0.00182573	0.594093	0.487522	0.106571
cg14792180	NM_001164440	ANKRD33B	0.00272801	0.631686	0.525132	0.106554
cg07164161	NM_012283	KCNG2	0.00622935	0.472052	0.365501	0.106551
cg26769927	NM_001030288;NM_003123	SPN;SPN	0.00232791	0.27542	0.38196	-0.10654
cg18736739	NM_004721	MAP3K13	0.0014449	0.665876	0.559375	0.106501
cg06130354	NM_015528	RNF167	0.000110886	0.265204	0.158714	0.106491
cg08364654			0.00465502	0.555884	0.662369	-0.106485
cg10081941	NM_016315	GULP1	0.000775778	0.632974	0.526567	0.106407
cg09889350	NM_000078	CETP	0.000136777	0.614315	0.720705	-0.106391
cg03767807	NM_001040439;NM_015133	MAPK8IP3;MAPK8IP3	0.00318837	0.808688	0.702302	0.106386
cg07045241	NM_001005463	EBF3	0.000205893	0.213106	0.319472	-0.106366
cg00733722			0.00198112	0.714852	0.608498	0.106354
cg20316538	NM_198483	RUFY4	0.000775778	0.64266	0.536341	0.106318
cg24762231	NM_006163;NM_001136023	NFE2;NFE2	0.00505029	0.251617	0.357921	-0.106304
cg25398315			0.00110202	0.464835	0.358533	0.106302
cg09166085	NM_031438	NUDT12	0.0082544	0.177892	0.284167	-0.106275
cg09113530	NM_005434;NM_005434	MALL;MALL	0.000539576	0.681584	0.787844	-0.10626
cg22332696	NR_002718	TDGF3	0.00371664	0.326292	0.432551	-0.106259
cg22012156			0.00182573	0.735008	0.628777	0.106231
cg04188920	NM_002627	PFKP	0.00717946	0.640783	0.746979	-0.106196
cg14312538	NM_001792	CDH2	0.0013077	0.130916	0.23709	-0.106173
cg27229100	NR_003030;NR_003605;NR_003606;NR_003604	SNORD12;C20orf199;C20orf199;C20orf199	0.00318837	0.456188	0.350043	0.106144
cg27333952	NM_001287;NM_001114331	CLCN7;CLCN7	0.00232791	0.295821	0.189684	0.106137
cg13173415			0.0066896	0.352058	0.245927	0.106131
cg09643312	NM_014880	CD302	0.00168136	0.292411	0.398531	-0.106121
cg10863922	NM_004155	SERPINB9	0.00272801	0.609748	0.503627	0.10612
cg15886307	NM_007174	CIT	0.0029502	0.510718	0.404651	0.106067
cg04763519			0.0082544	0.624749	0.73081	-0.106061
cg09594635			0.00465502	0.701963	0.59592	0.106043
cg08425678	NM_001135610	PRDM2	0.00214826	0.264343	0.158331	0.106012
cg10741422			0.00770052	0.303725	0.409734	-0.106009
cg26182406			0.000775778	0.580121	0.474121	0.106
cg10661769	NM_001167734;NM_020442;NM_001167733;NM_001517	VARS2;VARS2;VARS2;GTF2H4	0.00198112	0.459912	0.353927	0.105984
cg26697334	NM_018032;NM_201412	LUC7L;LUC7L	0.00770052	0.488216	0.382243	0.105973
cg25763292	NM_033340;NM_033339;NM_033338;NM_001227	CASP7;CASP7;CASP7;CASP7	0.00539169	0.575711	0.469759	0.105952
cg27434487			0.00214826	0.591009	0.696957	-0.105948
cg08660562	NM_001142523;NM_007199	IRAK3;IRAK3	5.99627e-05	0.887364	0.781421	0.105944
cg26140475			3.26654e-05	0.368491	0.262565	0.105926
cg21649604	NM_000967;NM_001033853;NR_000026	RPL3;RPL3;RNU86	0.000186125	0.328734	0.222824	0.10591
cg01876531	NM_025179	PLXNA2	0.00182573	0.516966	0.411062	0.105904
cg13048962	NM_006049	SNAPC5	0.000775778	0.493892	0.38801	0.105882
cg10021924			0.00432125	0.575108	0.46924	0.105867
cg13716034	NR_029637	MIR223	0.00432125	0.413895	0.519756	-0.105861
cg01029637			0.000868459	0.751835	0.64598	0.105855
cg02098619	NM_012102;NM_001042681	RERE;RERE	0.00214826	0.375187	0.269337	0.10585
cg12380441			0.000370631	0.499321	0.393504	0.105817
cg22143562	NM_182607;NM_001170553	VSIG1;VSIG1	0.00214826	0.732744	0.838535	-0.10579
cg19648023	NR_031666	MIR548N	0.00821993	0.825618	0.719863	0.105755
cg03462096			0.00168136	0.765391	0.659636	0.105755
cg00404641	NR_002949;NR_027766	NUDT16P;NUDT16P	2.29128e-05	0.395678	0.501411	-0.105733
cg02417427	NM_178276	SERINC5	0.00168136	0.337936	0.443662	-0.105726
cg24456846			0.00770052	0.24973	0.355448	-0.105718
cg27061485	NM_175931;NM_005187	CBFA2T3;CBFA2T3	0.00539169	0.25442	0.360127	-0.105707
cg10995925	NM_000595;NM_001159740	LTA;LTA	0.00198112	0.400964	0.295282	0.105682
cg19510565	NM_006762	LAPTM5	0.000591527	0.349667	0.243991	0.105676
cg06419219	NR_003955	LOC647121	0.00154733	0.772703	0.667027	0.105676
cg10521767			0.00172636	0.359607	0.253962	0.105644
cg18494902	NM_001003943;NM_033503;NM_001003942;NM_001003940;NM_033503	BMF;BMF;BMF;BMF;BMF	0.00770052	0.571883	0.466287	0.105596
cg11087723			0.00371664	0.826058	0.720466	0.105592
cg07156336	NM_004637	RAB7A	0.0013077	0.387703	0.282133	0.10557
cg11174855	NM_177400	NKX6-2	0.00142298	0.312196	0.417755	-0.105559
cg13315706	NM_000211;NM_001127491	ITGB2;ITGB2	0.00182573	0.319753	0.214194	0.105559
cg07737135	NM_032853;NR_024247	MUM1;MUM1	0.00946756	0.697639	0.80316	-0.105521
cg06929583			0.000407605	0.453841	0.348338	0.105503
cg23441595	NM_013416;NM_000631	NCF4;NCF4	0.000539576	0.371129	0.265627	0.105502
cg26720235			0.00770052	0.630019	0.735515	-0.105496
cg03278271			0.00120089	0.671348	0.565878	0.105469
cg22446998			0.00318837	0.496405	0.390963	0.105442
cg17759095	NM_001144769	DST	0.000370631	0.555511	0.450076	0.105435
cg23200509			4.37527e-06	0.77993	0.885362	-0.105432
cg05788927	NM_001009909	LUZP2	0.000491803	0.775851	0.670422	0.105429
cg08965235	NM_001164266;NM_001130144;NM_021070;NM_001164266	LTBP3;LTBP3;LTBP3;LTBP3	0.000168109	0.229369	0.334797	-0.105428
cg27470213	NM_005567	LGALS3BP	0.000775778	0.269986	0.164574	0.105412
cg01904145	NM_021935;NM_001126128	PROK2;PROK2	0.000775778	0.707981	0.602586	0.105396
cg27183173	NM_002579;NM_001040134	PALM;PALM	3.45852e-05	0.550748	0.656125	-0.105377
cg13836380			0.00272801	0.829101	0.723728	0.105373
cg02608831			0.00371664	0.658483	0.553136	0.105347
cg07091481	NM_032333	C10orf58	0.000336738	0.655146	0.760464	-0.105318
cg26691434	NM_001030288;NM_003123	SPN;SPN	0.0013077	0.329091	0.43438	-0.105289
cg09330145			0.0013077	0.474862	0.369584	0.105278
cg18279625			0.00101055	0.830863	0.725587	0.105276
cg11829633	NM_015316	PPP1R13B	0.00110202	0.851132	0.745889	0.105243
cg15925365	NM_001512	GSTA4	0.00142298	0.637752	0.742985	-0.105233
cg07444963			0.00884283	0.819368	0.714158	0.10521
cg12113851			0.000709274	0.783577	0.678371	0.105206
cg13632630			2.29128e-05	0.484423	0.589613	-0.105191
cg09993145	NM_001031680	RUNX3	0.000775778	0.248942	0.143761	0.105181
cg21204860	NM_001113496;NM_001113492;NM_001113493;NM_001113491;NM_006640;NM_001113494	SEPT9;SEPT9;SEPT9;SEPT9;SEPT9;SEPT9	0.00616239	0.375574	0.270431	0.105143
cg18333339			0.00101055	0.466863	0.571997	-0.105135
cg00257775	NM_021943	ZFAND3	0.00110202	0.412806	0.517926	-0.105121
cg14383078	NM_016734	PAX5	6.45615e-05	0.244318	0.139228	0.10509
cg16909914	NM_198401	ANKRD46	0.00770052	0.563521	0.458432	0.105089
cg09174555	NM_002964	S100A8	0.00232791	0.619419	0.514354	0.105065
cg16896205	NM_001040033	CD53	0.000305694	0.552485	0.447438	0.105047
cg02104893	NM_006714	SMPDL3A	3.66865e-05	0.741761	0.84676	-0.104999
cg19701087	NM_001512	GSTA4	0.00142298	0.557944	0.66293	-0.104986
cg03519879	NM_001043318;NM_194278	C14orf43;C14orf43	0.00371664	0.463231	0.358281	0.10495
cg25985721			0.00198112	0.511764	0.406825	0.104939
cg16618493	NM_015872	ZBTB7B	0.00148474	0.46366	0.358743	0.104917
cg06362282	NM_003782	B3GALT4	0.00154733	0.707976	0.603062	0.104914
cg07964754	NM_021149	COTL1	0.00182573	0.771147	0.666243	0.104904
cg06824277	NM_001099336;NM_198521	C12orf42;C12orf42	0.000447907	0.529504	0.634363	-0.104859
cg05616589			0.00371664	0.443439	0.338593	0.104846
cg22820108	NM_006312;NM_001077261	NCOR2;NCOR2	0.00252088	0.33923	0.444071	-0.104841
cg15046062	NM_153692	HTRA4	0.000336738	0.300544	0.405375	-0.104832
cg09332981	NM_014710;NM_001099411;NM_001099410	GPRASP1;GPRASP1;GPRASP1	8.95659e-05	0.481373	0.586188	-0.104814
cg24671330	NM_198505	ATP13A5	2.90545e-05	0.680459	0.57565	0.104809
cg15572745	NM_004796	NRXN3	0.00622935	0.364707	0.259911	0.104796
cg05673882	NM_016218	POLK	7.2074e-05	0.435545	0.330763	0.104783
cg15324978	NM_145648;NR_026666	SLC15A4;MGC16384	0.00400884	0.872667	0.767903	0.104765
cg27073113	NR_026889;NM_020988;NM_138736	DKFZP434H168;GNAO1;GNAO1	0.00157588	0.14743	0.252179	-0.104749
cg11076160	NM_001042517	DIAPH3	0.00121188	0.791473	0.686731	0.104742
cg11385338			0.000775778	0.612525	0.717259	-0.104734
cg08365609			0.0066896	0.648257	0.543547	0.10471
cg08675521			0.000407605	0.713556	0.608849	0.104707
cg10529555			0.00539169	0.56774	0.672413	-0.104673
cg06495803	NM_001242;NR_015382	CD27;LOC678655	0.00214826	0.356805	0.25214	0.104664
cg10732871	NM_002085;NM_001039847	GPX4;GPX4	0.00884283	0.505318	0.40068	0.104639
cg23754934	NM_148975	MS4A4A	0.00272801	0.570634	0.675248	-0.104613
cg26479374	NM_001328;NM_001012614;NM_052861	CTBP1;CTBP1;C4orf42	2.58154e-05	0.785779	0.681185	0.104594
cg08364772			0.00360288	0.699692	0.595098	0.104594
cg26558111	NM_001102595;NM_020892;NM_001102594;NM_001102596	DTX2;DTX2;DTX2;DTX2	0.000251303	0.691086	0.586517	0.104569
cg11165391			0.00371664	0.725554	0.620986	0.104569
cg13911707	NM_032752	ZNF496	0.000110886	0.655214	0.759778	-0.104563
cg25694755	NM_020178;NM_001082534;NM_001082533	CA10;CA10;CA10	0.00198112	0.676762	0.781309	-0.104547
cg08737116	NM_018420	SLC22A15	0.00132378	0.367673	0.263142	0.104531
cg18556420	NM_015155	LARP4B	0.000847879	0.777052	0.672534	0.104518
cg24743301	NM_001128165;NM_153214	FBLN7;FBLN7	0.00344351	0.553261	0.448745	0.104516
cg02385728	NM_032843;NM_001145106	FIBCD1;FIBCD1	0.000336738	0.797733	0.69322	0.104513
cg21183455	NR_026997	C22orf34	0.0057972	0.748891	0.853379	-0.104489
cg17136255			0.00717946	0.347918	0.243456	0.104462
cg09438075	NM_017993	ENOX1	0.00344351	0.684884	0.789343	-0.104458
cg03906115	NM_001166265;NM_000627;NM_206943;NM_001166264;NM_001166266	LTBP1;LTBP1;LTBP1;LTBP1;LTBP1	0.00344351	0.562862	0.667308	-0.104447
cg00285394	NM_003129	SQLE	0.000847879	0.641633	0.537199	0.104434
cg04742719	NM_020246;NM_003302	SLC12A9;TRIP6	0.000205893	0.459431	0.563836	-0.104405
cg27443224	NM_002989;NM_002989	CCL21;CCL21	0.00232791	0.551621	0.447231	0.104391
cg14628982	NM_001170585;NM_153021	PLB1;PLB1	0.000168109	0.755783	0.651393	0.10439
cg10974219	NM_001146312;NM_153604	MYOCD;MYOCD	0.000775778	0.634225	0.529841	0.104383
cg12062672	NM_020637	FGF22	0.000205893	0.673595	0.569228	0.104366
cg15825928			4.11601e-05	0.732765	0.837102	-0.104337
cg10136841	NM_002121	HLA-DPB1	0.00142298	0.619501	0.515172	0.104328
cg02229095	NM_030580	ZNF34	0.00198112	0.431705	0.327383	0.104322
cg06825878			0.0066896	0.700563	0.596304	0.104259
cg27124742	NM_182699	DDX53	0.000847879	0.779164	0.883417	-0.104253
cg12022621	NM_017773;NM_001136190;NM_017773	LAX1;LAX1;LAX1	0.00622935	0.435652	0.331404	0.104247
cg25434864			0.000370631	0.773641	0.877884	-0.104244
cg27214730	NM_004443	EPHB3	0.00214826	0.632723	0.52849	0.104233
cg14411221	NM_001008726;NM_080666	WDR89;WDR89	0.0057972	0.727793	0.623611	0.104182
cg06128198	NM_001380	DOCK1	0.0029502	0.216692	0.320856	-0.104164
cg19235307	NM_052990;NM_018262;NM_003925;NM_052985;NM_052989	IFT122;IFT122;MBD4;IFT122;IFT122	0.000407605	0.684051	0.788203	-0.104152
cg09452082			0.00232791	0.285461	0.389606	-0.104146
cg11399254	NM_003189	TAL1	0.00501141	0.360443	0.464579	-0.104136
cg00032884	NM_002158	FOXN2	0.00371664	0.70024	0.596111	0.104129
cg04475027	NM_001136103	TMEM132C	0.00432125	0.278366	0.382484	-0.104119
cg20668718	NM_014790	JAKMIP2	8.95659e-05	0.766076	0.661967	0.104109
cg14596108	NM_001082967;NM_015381	FAM19A5;FAM19A5	0.00539169	0.745802	0.641715	0.104087
cg07584860	NR_001434	HLA-H	0.00729082	0.446778	0.55086	-0.104082
cg00662956			0.00198112	0.357827	0.253754	0.104074
cg12360084	NM_144704;NM_001018060;NR_027464;NM_001146288	AIFM3;AIFM3;AIFM3;AIFM3	0.00120089	0.544827	0.440755	0.104072
cg04967410	NM_014732	KIAA0513	0.00465502	0.566419	0.670487	-0.104068
cg19782686	NM_145207	SPATA5	0.00432125	0.344973	0.449025	-0.104052
cg05017639	NM_001145204	SHISA9	0.00318837	0.624349	0.520298	0.104051
cg23172671			0.0066896	0.426377	0.322342	0.104035
cg08593157	NR_024007;NM_030665	SMCR5;RAI1	0.00770052	0.616171	0.720189	-0.104019
cg26876834	NR_003142;NR_002326;NR_002327;NM_002952	SNHG9;SNORA64;SNORA10;RPS2	0.00491617	0.760982	0.656966	0.104017
cg11870206	NM_001024656;NM_001114598;NM_001024656	ASPDH;ASPDH;ASPDH	0.00198112	0.489475	0.593453	-0.103978
cg22414262	NR_030414	MIR802	0.00154733	0.48199	0.585968	-0.103978
cg26636045			0.00318837	0.23441	0.338382	-0.103972
cg25215028			0.00611481	0.433001	0.329031	0.10397
cg16462006			0.00717946	0.502839	0.606806	-0.103967
cg04610450	NM_005027	PIK3R2	8.95659e-05	0.269767	0.165801	0.103965
cg02660277	NM_002847;NM_130842;NM_130843	PTPRN2;PTPRN2;PTPRN2	0.00182573	0.794652	0.690696	0.103956
cg03942932			0.000775778	0.32002	0.423971	-0.103951
cg10303698	NM_017949	CUEDC1	0.00232791	0.363058	0.259127	0.103931
cg04367427			0.00371664	0.71137	0.815284	-0.103914
cg19229651			0.00501142	0.744453	0.640563	0.10389
cg13664588	NR_004395	SNORD1A	0.00252088	0.666065	0.562191	0.103873
cg17379932	NM_015542;NM_080599	UPF2;UPF2	0.00616239	0.370362	0.266513	0.103849
cg08809405			0.000336738	0.728316	0.832157	-0.103841
cg08441314	NM_003105	SORL1	0.00465502	0.706977	0.603158	0.10382
cg14678088	NM_007118	TRIO	0.000227564	0.805464	0.701647	0.103817
cg14290450	NM_206918	DEGS2	0.000227564	0.82507	0.721262	0.103808
cg09825327	NM_004619;NM_001033910	TRAF5;TRAF5	0.000370631	0.300438	0.196654	0.103783
cg00301372			0.00400884	0.585032	0.481269	0.103763
cg17387122	NM_001136004;NM_015241;NM_001122731	MICAL3;MICAL3;MICAL3	0.00602163	0.458469	0.354748	0.103721
cg26379258	NR_028338;NM_001164283;NM_001164283;NM_001164281;NM_001164282;NM_147686	TRAF3IP2;TRAF3IP2;TRAF3IP2;TRAF3IP2;TRAF3IP2;TRAF3IP2	0.00344351	0.202173	0.305883	-0.103711
cg20411813	NM_001231	CASQ1	0.00432125	0.437646	0.333966	0.103681
cg13910377	NR_024367	NCRNA00111	0.00214826	0.341772	0.445445	-0.103673
cg11032707	NR_033252;NM_001482	LOC145663;GATM	0.00198112	0.536216	0.432568	0.103648
cg26369382	NM_003227	TFR2	0.000539576	0.659435	0.555818	0.103616
cg08913410			0.00432125	0.648047	0.544481	0.103566
cg18028470	NM_017837	PIGV	0.00371664	0.591495	0.487936	0.103559
cg25357825	NM_014667	VGLL4	0.000336738	0.388462	0.492014	-0.103553
cg07496173			0.00214826	0.617936	0.721487	-0.103551
cg17327331	NM_022474	MPP5	0.00622935	0.425653	0.529192	-0.103539
cg01003666			0.00432125	0.520517	0.416986	0.103531
cg06369349	NM_006666	RUVBL2	2.29128e-05	0.354837	0.251313	0.103524
cg14413354			0.000277283	0.331505	0.227997	0.103508
cg24474852	NM_000029;NM_000029	AGT;AGT	0.00168136	0.349909	0.453409	-0.1035
cg18020065	NM_007368	RASA3	0.00272801	0.693661	0.590174	0.103486
cg24535823	NM_001042532;NM_025233;NM_001042530;NM_001042529;NM_001042531	COASY;COASY;COASY;COASY;COASY	0.00232791	0.789792	0.686337	0.103456
cg19751930	NM_013385	CYTH4	0.00232791	0.369427	0.265972	0.103454
cg01716252	NM_015833;NM_001160230;NM_001112;NR_027674;NR_027672;NM_015834;NR_027673	ADARB1;ADARB1;ADARB1;ADARB1;ADARB1;ADARB1;ADARB1	0.000447907	0.626998	0.730441	-0.103443
cg27619291	NM_007332	TRPA1	0.00101353	0.571723	0.675143	-0.10342
cg16186396			0.000249092	0.81902	0.715616	0.103403
cg15006828			0.0029502	0.531411	0.428047	0.103363
cg03540589	NM_033027	CSRNP1	0.00884283	0.340592	0.443954	-0.103362
cg14264496	NR_024455	LOC100133612	0.00101055	0.315004	0.211646	0.103358
cg20595453	NM_022553	VPS52	0.00539169	0.496913	0.60026	-0.103347
cg26696162	NM_020861	ZBTB2	0.0082544	0.342615	0.445953	-0.103338
cg03411938	NM_000218;NR_002728;NM_181798	KCNQ1;KCNQ1OT1;KCNQ1	0.000251303	0.547165	0.650472	-0.103307
cg01055594	NM_020779;NM_001006657	WDR35;WDR35	0.000539576	0.655413	0.758711	-0.103299
cg21664281			0.000151703	0.701192	0.804487	-0.103295
cg14769207	NM_005069;NM_009586	SIM2;SIM2	9.97036e-05	0.343384	0.446671	-0.103287
cg00635590			0.00770052	0.478685	0.375401	0.103284
cg27370573	NM_177526;NM_003712;NM_177543	PPAP2C;PPAP2C;PPAP2C	0.00400884	0.748474	0.85175	-0.103276
cg01789501			0.00154733	0.723917	0.620642	0.103275
cg03882382	NM_052972	LRG1	5.77757e-05	0.407336	0.304065	0.103271
cg05175803	NM_002231;NM_001024844	CD82;CD82	0.00214826	0.504448	0.401181	0.103267
cg09236311	NM_001002026;NM_016369	CLDN18;CLDN18	5.00641e-06	0.750852	0.647603	0.103249
cg13377102	NM_004732	KCNAB3	0.00240465	0.867557	0.764323	0.103234
cg07329251	NM_001025389;NM_001025390;NM_000480	AMPD3;AMPD3;AMPD3	0.00198112	0.310981	0.20779	0.103191
cg04163638	NM_030797	FAM49A	0.000847879	0.816777	0.713589	0.103188
cg00408605	NM_001160372;NM_031466	TRAPPC9;TRAPPC9	0.0014449	0.828627	0.725456	0.103171
cg17044159			0.00154733	0.275311	0.378422	-0.103111
cg27567922	NM_018406;NM_138297;NM_004532	MUC4;MUC4;MUC4	0.00432125	0.83397	0.730864	0.103105
cg22512367			0.00168136	0.775331	0.672244	0.103087
cg21659714	NM_207368;NM_001093767	FAM195B;FAM195B	0.000227564	0.717264	0.614195	0.103069
cg22509845			0.00884283	0.617687	0.514627	0.103061
cg19325791			0.000591527	0.496621	0.599677	-0.103057
cg25191850	NM_002245	KCNK1	0.000407605	0.210456	0.313496	-0.10304
cg21618521	NM_003782	B3GALT4	0.000847879	0.617992	0.514954	0.103038
cg10431747	NM_032884;NM_001134734	C1orf94;C1orf94	0.00101055	0.354402	0.457439	-0.103038
cg06159340	NM_001142544;NM_001330	CTF1;CTF1	0.00198112	0.627697	0.730728	-0.10303
cg17082225			0.0057972	0.720445	0.823447	-0.103002
cg06192883	NM_018728	MYO5C	9.97036e-05	0.461867	0.358865	0.103002
cg08169020	NM_004926	ZFP36L1	0.0013077	0.528587	0.425588	0.103
cg03930929	NM_020873	LRRN1	0.00110202	0.706768	0.603772	0.102997
cg02980499	NM_001114094;NM_013314	BLNK;BLNK	0.00432125	0.459583	0.356607	0.102976
cg18708233	NM_138357	CCDC109A	0.000539576	0.471814	0.36886	0.102954
cg15075241	NR_028374;NM_002539	SNORA80B;ODC1	0.00344351	0.617357	0.514409	0.102947
cg07842386	NM_144701	IL23R	0.00166278	0.764777	0.661837	0.10294
cg26234223	NM_006363;NM_032985;NM_032986	SEC23B;SEC23B;SEC23B	0.00622935	0.313958	0.416893	-0.102935
cg19514721			0.000447907	0.704917	0.807833	-0.102916
cg07469926	NM_018700;NM_001017397;NM_001017398	TRIM36;TRIM36;TRIM36	0.00465502	0.690424	0.793306	-0.102883
cg17383203	NM_016447	MPP6	0.0020903	0.607903	0.505024	0.102879
cg05819223	NM_005012;NM_001083592	ROR1;ROR1	0.00539169	0.695463	0.592598	0.102866
cg27154651			0.00232791	0.569152	0.672008	-0.102856
cg22529184	NM_198493	ANKRD45	0.00110202	0.788032	0.685178	0.102854
cg03846249			0.00101055	0.297303	0.194456	0.102847
cg01560676	NM_001031711	ERGIC1	0.00154733	0.537862	0.435019	0.102843
cg27308982	NM_006162;NM_172388;NM_172389;NM_172387;NM_172390	NFATC1;NFATC1;NFATC1;NFATC1;NFATC1	0.00770052	0.816928	0.714089	0.102838
cg10102102			0.00432125	0.728375	0.625557	0.102818
cg25989526			0.00252088	0.210232	0.31304	-0.102808
cg17033086			0.000925989	0.699713	0.596917	0.102796
cg03284554	NM_152419	HGSNAT	1.5915e-05	0.350621	0.453417	-0.102795
cg13500877	NM_006186	NR4A2	0.000491803	0.722831	0.825597	-0.102766
cg17470251	NM_001130518;NM_001130518;NR_024040;NM_018371	CSGALNACT1;CSGALNACT1;CSGALNACT1;CSGALNACT1	0.00110202	0.688299	0.791024	-0.102725
cg04932755	NM_004429	EFNB1	0.000447907	0.321974	0.219253	0.102721
cg17504164			1.5915e-05	0.744472	0.641765	0.102707
cg07201475			0.00272801	0.683628	0.7863	-0.102672
cg20927119	NM_001164458;NM_001164459;NM_001164459	ACTR3C;ACTR3C;ACTR3C	0.000539576	0.620169	0.722798	-0.102629
cg05304729	NM_002432	MNDA	0.0029502	0.50341	0.400782	0.102628
cg10913077	NM_001128615	ARHGEF3	0.000407605	0.447411	0.344837	0.102574
cg12840847	NM_001143999;NM_003003;NM_001143998;NM_001039573;NM_001144001	SEC14L1;SEC14L1;SEC14L1;SEC14L1;SEC14L1	0.00344351	0.785248	0.682678	0.10257
cg14688879			0.00252088	0.713435	0.610869	0.102565
cg06959635	NM_005369;NM_001099855	MCF2;MCF2	0.000647979	0.590702	0.693254	-0.102552
cg03391657	NR_003955	LOC647121	0.00120089	0.482131	0.379581	0.102551
cg12954334	NM_022916	VPS33A	0.00110202	0.820821	0.718274	0.102547
cg16207110			0.00101055	0.243873	0.14133	0.102542
cg10888790			0.000205893	0.244503	0.34704	-0.102536
cg22229039			0.0057972	0.537996	0.640524	-0.102528
cg16097772	NM_000239	LYZ	0.000591527	0.72129	0.823814	-0.102524
cg26682661	NM_005107;NM_001145464	EXOG;EXOG	7.71558e-06	0.45019	0.552679	-0.102489
cg05242915			0.000775778	0.583562	0.481079	0.102483
cg27159979	NM_022893;NM_138559;NM_018014	BCL11A;BCL11A;BCL11A	0.00232791	0.581145	0.478677	0.102468
cg12000587	NM_018405	C17orf79	0.000847879	0.3965	0.294047	0.102453
cg25196389	NM_022462;NM_152795;NM_152794	HIF3A;HIF3A;HIF3A	0.00232791	0.675948	0.778401	-0.102453
cg06528575	NM_001142473;NM_001142472;NM_005449	FAIM3;FAIM3;FAIM3	0.00884283	0.191001	0.29345	-0.102449
cg24931355	NM_030665	RAI1	0.00120089	0.209382	0.311828	-0.102445
cg23750365	NM_002121	HLA-DPB1	0.00501141	0.677262	0.574834	0.102428
cg19919383	NM_001144382;NM_015184	PLCL2;PLCL2	0.00887355	0.68835	0.790767	-0.102417
cg05506600			0.0013077	0.474152	0.576546	-0.102394
cg19109050	NM_001098623;NM_052843	OBSCN;OBSCN	0.00371664	0.535354	0.637721	-0.102368
cg06436658	NM_001101426;NM_001101417	ISPD;ISPD	0.00272801	0.806673	0.704316	0.102356
cg11417178			0.0066896	0.736929	0.839274	-0.102346
cg04902838	NM_152744	SDK1	0.000407605	0.880228	0.777896	0.102332
cg24740320			0.0022798	0.636674	0.534353	0.102321
cg21179088	NM_182546	VSTM2A	0.0013077	0.31118	0.4135	-0.10232
cg01692968			2.29128e-05	0.272403	0.374695	-0.102292
cg06987246	NM_017560	ZNF853	0.000591527	0.521123	0.418848	0.102275
cg15832300	NM_001098576;NM_003217	TMBIM6;TMBIM6	0.00154733	0.365464	0.263221	0.102243
cg02213045	NM_153246	C6orf223	0.00252088	0.656932	0.554698	0.102235
cg20154206	NM_032740	SFT2D3	0.000447907	0.705048	0.602815	0.102233
cg25030266	NM_033397	ITPRIP	0.000336738	0.282083	0.179853	0.10223
cg20427144	NM_024963	FBXL18	0.00318837	0.343633	0.445854	-0.102222
cg25444839	NM_001099408;NM_003085;NM_001001502;NM_001099408	EIF4E1B;SNCB;SNCB;EIF4E1B	0.00171743	0.432679	0.330458	0.102222
cg03887438	NM_001012393	OPCML	0.000647979	0.592997	0.695204	-0.102207
cg04148163			0.00182573	0.731551	0.629357	0.102194
cg08619295			0.0082544	0.223658	0.325824	-0.102165
cg05483534	NM_012249	RHOQ	0.00884283	0.509554	0.407401	0.102153
cg03582327	NM_001171160;NM_001171158;NM_001171157;NM_001171156;NM_033130;NM_001171159;NM_001171161	SIGLEC10;SIGLEC10;SIGLEC10;SIGLEC10;SIGLEC10;SIGLEC10;SIGLEC10	0.00182573	0.7151	0.612953	0.102147
cg14446165	NM_001134398;NM_003371	VAV2;VAV2	0.000647979	0.625911	0.523829	0.102082
cg01533849			4.75085e-05	0.490156	0.592212	-0.102056
cg13940444	NM_000966	RARG	0.00344351	0.211795	0.313832	-0.102037
cg04286697	NM_145236	B3GNT7	0.00272801	0.604243	0.502211	0.102031
cg07782241	NM_001135731;NM_024645	ZMAT4;ZMAT4	2.29128e-05	0.57322	0.471204	0.102016
cg10416668	NM_021798;NM_181078;NM_181079	IL21R;IL21R;IL21R	0.0066896	0.363032	0.261046	0.101986
cg21605283	NM_138328	RHBDL3	0.00198112	0.359949	0.461933	-0.101984
cg19795292	NM_016232;NM_003856	IL1RL1;IL1RL1	0.00318837	0.608848	0.710822	-0.101974
cg04190888			0.00272801	0.296826	0.194873	0.101953
cg16928487	NM_001005291;NM_004176	SREBF1;SREBF1	0.00232791	0.33282	0.434749	-0.101929
cg07847989	NM_000868	HTR2C	0.000370631	0.664645	0.766568	-0.101923
cg23856267			0.0029502	0.331288	0.433187	-0.101899
cg05358758	NM_033448	KRT71	0.00261093	0.704065	0.602167	0.101898
cg03382306			0.00132378	0.744281	0.642384	0.101897
cg09474017	NM_019105	TNXB	0.000591527	0.417137	0.315247	0.10189
cg06294384			0.00252088	0.618514	0.516631	0.101883
cg17996401			0.000151703	0.199414	0.301282	-0.101868
cg08076102	NM_005940	MMP11	0.000847879	0.665663	0.767515	-0.101852
cg23639565	NM_006367;NM_001105530	CAP1;CAP1	0.000186125	0.31442	0.21257	0.10185
cg00673685	NM_001004308	ZCCHC16	0.00717946	0.399065	0.297222	0.101843
cg22437699	NM_139058	ARX	0.00344351	0.424312	0.526097	-0.101785
cg14068057			0.00717946	0.815057	0.713354	0.101703
cg15979932	NM_017949	CUEDC1	0.00344351	0.461538	0.359838	0.1017
cg25694915	NM_001171631;NM_052946;NM_001171632;NM_001039724	NOSTRIN;NOSTRIN;NOSTRIN;NOSTRIN	0.00383077	0.734733	0.836428	-0.101695
cg27541604	NM_004833;NM_004833	AIM2;AIM2	0.00252088	0.495409	0.393735	0.101674
cg16996281	NM_031433;NM_015645	MFRP;C1QTNF5	0.0029502	0.585245	0.48358	0.101665
cg01471111	NM_016615	SLC6A13	0.00214826	0.715871	0.817524	-0.101653
cg04144521	NM_017694	MFSD6	0.000305694	0.586956	0.688606	-0.10165
cg08445263	NM_033223	GABRG3	0.000227564	0.298596	0.400234	-0.101638
cg11657817	NM_130794;NM_080830	CST11;CST11	0.000305694	0.544421	0.442783	0.101638
cg05657208	NM_001033855;NM_022487;NM_001033857;NM_001033858	DCLRE1C;DCLRE1C;DCLRE1C;DCLRE1C	0.00252088	0.627431	0.52581	0.101622
cg00781208	NM_020762	SRGAP1	0.00318837	0.704565	0.806186	-0.101621
cg19800670			0.00360288	0.712263	0.813808	-0.101545
cg03694279			0.000251303	0.472799	0.574344	-0.101545
cg02556928	NM_000395	CSF2RB	0.00539169	0.448345	0.346812	0.101533
cg10315334	NM_002985;NM_002985	CCL5;CCL5	0.00110202	0.565141	0.46364	0.1015
cg27321942	NR_026712;NR_000020;NR_000018;NR_000019;NM_012423;NR_000021	RPL13AP5;SNORD33;SNORD35A;SNORD34;RPL13A;SNORD32A	0.000539576	0.683909	0.582412	0.101497
cg23688479	NM_001134848	CCDC152	1.5915e-05	0.723666	0.825159	-0.101493
cg15172739	NR_002561;NR_000008;NR_002560;NR_003098	SNORD30;SNORD22;SNORD31;SNHG1	0.00622935	0.685495	0.584012	0.101483
cg26546113	NM_001357	DHX9	0.000925989	0.657866	0.556409	0.101457
cg10219816	NM_014638	PLCH2	0.00232791	0.777522	0.67608	0.101441
cg09232906	NM_014641	MDC1	0.00110202	0.674944	0.573518	0.101426
cg09730369	NR_002768;NM_001080956;NM_001080951;NM_001080953;NM_001080952;NM_002656;NM_001080955;NM_001080954;NM_006718	HYMAI;PLAGL1;PLAGL1;PLAGL1;PLAGL1;PLAGL1;PLAGL1;PLAGL1;PLAGL1	0.0013077	0.649865	0.751273	-0.101407
cg00907272			0.00110202	0.26965	0.371049	-0.1014
cg13804377	NM_033467	MMEL1	0.00717946	0.613453	0.714853	-0.1014
cg06178073	NR_024553	ZNF204P	0.00198112	0.435551	0.536945	-0.101394
cg06525651	NM_001039762;NM_001039762;NM_001380	FAM196A;FAM196A;DOCK1	3.66865e-05	0.265486	0.36688	-0.101394
cg15815827	NM_022105;NM_080797;NM_033081;NM_080796	DIDO1;DIDO1;DIDO1;DIDO1	0.00884283	0.239827	0.341208	-0.101381
cg14544831	NM_000633;NM_000657	BCL2;BCL2	0.000847879	0.424975	0.323596	0.10138
cg25720114	NM_001017978	CXorf61	0.000168109	0.741129	0.842473	-0.101344
cg23236959	NM_153026	PRICKLE1	0.000775778	0.810368	0.709028	0.10134
cg20115597	NR_029420	LOC650226	0.000186125	0.615331	0.716655	-0.101324
cg22029774			0.000847879	0.812435	0.711134	0.101301
cg23267665	NM_015866;NM_001135610;NM_012231	PRDM2;PRDM2;PRDM2	0.000323097	0.763162	0.661876	0.101286
cg15676988			0.00266955	0.428146	0.529419	-0.101272
cg09012633	NR_027335;NR_027336	LOC100130015;LOC100130015	0.000925989	0.315584	0.416833	-0.101249
cg01133413	NM_130467;NM_001013435	PAGE5;PAGE5	1.79907e-05	0.701598	0.802825	-0.101228
cg15545247	NM_006018;NM_006018	GPR109B;GPR109B	0.00318837	0.728209	0.626984	0.101225
cg21027526	NM_030670;NM_030671;NM_030669;NM_030668;NM_002848;NM_030667	PTPRO;PTPRO;PTPRO;PTPRO;PTPRO;PTPRO	0.0013077	0.582977	0.684168	-0.101191
cg14239307	NM_001143764;NM_001143763;NM_130784	SYCE1;SYCE1;SYCE1	0.00717946	0.747181	0.848365	-0.101184
cg26810767			0.00622935	0.615374	0.514196	0.101177
cg17050756	NR_015410	FLJ22536	0.00501141	0.428344	0.327186	0.101157
cg14649507	NM_001012516;NM_030926;NM_001012514	ITM2C;ITM2C;ITM2C	0.00318837	0.311003	0.412141	-0.101138
cg03817667	NM_182546	VSTM2A	0.00168136	0.374629	0.47575	-0.101121
cg25200182			0.00371664	0.255634	0.154518	0.101116
cg21876925	NM_003326	TNFSF4	0.00110202	0.262085	0.363178	-0.101093
cg01984511	NM_004416;NM_004416	DTX1;DTX1	0.00214826	0.39526	0.294196	0.101064
cg12298755	NM_022805;NM_022804;NM_003097;NM_022808;NM_022807;NM_005678;NM_022806	SNRPN;SNURF;SNRPN;SNRPN;SNRPN;SNURF;SNRPN	0.000110886	0.590386	0.691437	-0.101051
cg00647820	NM_024119	DHX58	7.2074e-05	0.198801	0.0977508	0.10105
cg20118717	NM_006772	SYNGAP1	0.00252088	0.324668	0.425703	-0.101036
cg00869668	NM_003693;NM_145352;NM_145352;NR_028076;NM_003693;NR_028075;NM_145350;NM_145350	SCARF1;SCARF1;SCARF1;SCARF1;SCARF1;SCARF1;SCARF1;SCARF1	0.00491617	0.325185	0.426211	-0.101026
cg17825400	NM_001077269;NM_003387	WIPF1;WIPF1	0.00168136	0.431327	0.33031	0.101017
cg10468737	NM_203408;NM_203408	FAM47A;FAM47A	0.00318837	0.783762	0.884767	-0.101005
cg12630576			0.000305694	0.329819	0.228833	0.100986
cg00806239	NM_001146019;NM_080604;NM_001146020;NM_001146016;NR_027394;NM_001146017;NM_001146018	TJAP1;TJAP1;TJAP1;TJAP1;TJAP1;TJAP1;TJAP1	0.00120089	0.308685	0.2077	0.100985
cg15594550	NM_030895	ZNF696	0.000277283	0.683588	0.784454	-0.100865
cg21386586	NM_002929;NM_002929	GRK1;GRK1	0.000709274	0.527951	0.628796	-0.100845
cg19846758	NM_001171689;NM_020769	AMMECR1;RGAG1	0.00884283	0.336838	0.437682	-0.100843
cg03291819	NM_021785	RAI2	0.000136777	0.60798	0.70881	-0.10083
cg14597723	NM_015016	MAST3	0.00272801	0.753112	0.652283	0.100829
cg23679141	NM_001166373;NM_012403	MARCH1;ANP32C	0.00252088	0.417967	0.317138	0.100829
cg03851835	NM_017515	SLC35F2	0.00884283	0.384488	0.283666	0.100823
cg22960869	NM_016428;NM_031498;NM_001135186	ABI3;GNGT2;ABI3	0.00252088	0.304764	0.203942	0.100822
cg21044572			0.000251303	0.662223	0.763023	-0.100799
cg16962557	NM_152680	TMEM154	0.000491803	0.571383	0.470587	0.100796
cg05759718	NM_032785;NM_032785	AGBL4;AGBL4	0.00400884	0.190779	0.291571	-0.100792
cg07601804	NM_001215	CA6	2.51805e-06	0.373169	0.272423	0.100746
cg12392519	NM_001143804;NM_178500	PHOSPHO1;PHOSPHO1	0.000370631	0.499785	0.399051	0.100735
cg14844236	NM_004642	CDK2AP1	3.81861e-06	0.392894	0.493597	-0.100703
cg11058916			0.000591527	0.742427	0.843119	-0.100692
cg13392022	NM_001025107	ADAR	0.0066896	0.528369	0.427679	0.10069
cg04467093	NM_003202	TCF7	0.00198112	0.426923	0.527613	-0.10069
cg18972123	NM_000242	MBL2	0.000447907	0.654376	0.553695	0.100682
cg11086695			0.000205893	0.698971	0.799631	-0.100659
cg21761853	NM_005803	FLOT1	4.96485e-05	0.317051	0.216401	0.10065
cg13445177	NM_002966	S100A10	4.6132e-05	0.764996	0.664358	0.100638
cg22891070	NM_152795;NM_022462	HIF3A;HIF3A	4.6132e-05	0.733524	0.834142	-0.100618
cg10825847	NM_001136111;NM_001136109;NM_004347;NR_024239;NM_001136110;NM_001136112	CASP5;CASP5;CASP5;CASP5;CASP5;CASP5	0.000227564	0.549662	0.449056	0.100606
cg14523847	NM_001039350;NM_001039350	DPP6;DPP6	0.00142298	0.394452	0.495035	-0.100583
cg16405432			0.00400884	0.417965	0.518529	-0.100564
cg06323332	NM_015246;NM_001142291;NM_001142290;NM_001142289	MGRN1;MGRN1;MGRN1;MGRN1	0.00110202	0.339019	0.439543	-0.100524
cg15867307			0.000407605	0.770518	0.670005	0.100513
cg17204113			0.00465502	0.2874	0.38788	-0.10048
cg26992245			0.000407605	0.7966	0.696132	0.100468
cg21667061	NM_024611;NM_001018089	NARG2;NARG2	0.00717946	0.586617	0.486167	0.100451
cg06598836			0.000591527	0.272956	0.373401	-0.100445
cg04581516			0.000205893	0.742226	0.641787	0.100439
cg21169779	NM_197956	NAIF1	0.000709274	0.742894	0.843328	-0.100434
cg00466334	NM_152380	TBX15	0.00272801	0.246772	0.347197	-0.100425
cg18663307	NM_001127491;NM_000211	ITGB2;ITGB2	0.00154733	0.71358	0.61316	0.10042
cg12153480	NM_001967	EIF4A2	0.00101055	0.736862	0.636454	0.100408
cg06629713			0.000251303	0.639077	0.538669	0.100408
cg23860337			0.00717946	0.298887	0.198484	0.100403
cg19499884	NM_032429	LZTS2	0.00142298	0.174837	0.275231	-0.100394
cg03339537	NM_006186	NR4A2	0.00622935	0.295718	0.396106	-0.100388
cg26257814	NR_027257	FLJ26850	0.000168109	0.253368	0.152994	0.100374
cg21179705			0.00272801	0.75824	0.657879	0.100361
cg06645921	NM_153449	SLC2A14	0.000591527	0.276974	0.377335	-0.100361
cg14016344	NM_001782	CD72	0.000168109	0.413555	0.313219	0.100336
cg17815933	NM_018416	FOXJ2	0.000552276	0.170815	0.271151	-0.100335
cg04722215	NM_212481	ARID5A	0.000370631	0.359419	0.25909	0.100329
cg00530870	NM_144725	TTC23L	0.000123209	0.570502	0.67076	-0.100258
cg15746427	NM_181532	ERAS	0.000447907	0.714322	0.814534	-0.100212
cg13325231	NM_030782	CLPTM1L	0.0029502	0.594803	0.494594	0.100209
cg18675847	NM_001166693	AFF1	0.00946756	0.487741	0.587938	-0.100198
cg12743031	NM_173175;NM_004103;NM_173174;NM_173176	PTK2B;PTK2B;PTK2B;PTK2B	0.000305694	0.404372	0.304181	0.100191
cg17840047			0.000447907	0.800114	0.699924	0.10019
cg12930392	NM_002577	PAK2	0.00371664	0.269761	0.369931	-0.10017
cg06825415			0.00455336	0.789524	0.689356	0.100168
cg22539431	NM_014390	SND1	0.000407605	0.48685	0.386688	0.100162
cg11141696			0.000847879	0.790567	0.690408	0.10016
cg02245467	NM_021020	LZTS1	0.000136777	0.629377	0.72953	-0.100153
cg21854952	NM_001098202;NM_006497	HIC1;HIC1	0.00371664	0.322954	0.222803	0.100151
cg17271585	NM_001167821;NM_001167823;NM_001167820;NM_001167822;NM_006698	BLCAP;BLCAP;BLCAP;BLCAP;BLCAP	0.0013077	0.401177	0.301032	0.100145
cg25926515	NM_030625	TET1	0.00120089	0.377983	0.478114	-0.100131
cg18974084	NM_001008537	KIAA2022	0.00168136	0.799941	0.900058	-0.100116
cg21698310	NM_032595	PPP1R9B	0.000647979	0.253165	0.153052	0.100113
cg08412215			0.00182573	0.50943	0.409344	0.100086
cg11385536	NM_020247	CABC1	0.00110202	0.617023	0.516939	0.100084
cg22574818	NM_014061;NM_014061	MAGEH1;MAGEH1	0.000591527	0.60864	0.708722	-0.100082
cg09549813	NM_013399	C16orf5	0.000305694	0.247557	0.347621	-0.100065
cg24320673	NM_007261	CD300A	0.00884283	0.542277	0.642341	-0.100064
cg08243524	NM_024898	DENND1C	0.000123209	0.279154	0.179126	0.100028

## Sheet: CpG BL DiffMedian>15% p<0.01
targetID	geneCode	geneName	p values	median_LB patients	median_LB controls	diffMedian_LB patients to controls
cg05696877	NM_006820	IFI44L	0.000186125	0.19193	0.633779	-0.441849
cg09639108			0.00859181	0.534013	0.934506	-0.400494
cg12501287	NM_005539	INPP5A	0.00663553	0.560641	0.960031	-0.39939
cg14114910	NM_198469	MORN5	0.0066896	0.560745	0.953285	-0.39254
cg05552874	NM_001548	IFIT1	8.47324e-06	0.294863	0.684103	-0.38924
cg16866567	NM_021623	PLEKHA2	0.00530429	0.457565	0.0684451	0.38912
cg16564132			0.0029502	0.219294	0.562267	-0.342973
cg19585676	NM_002116	HLA-A	0.0082544	0.700715	0.359224	0.341491
cg04282082	NM_199160;NM_014368	LHX6;LHX6	0.0013077	0.566787	0.907969	-0.341182
cg03607951	NM_006820	IFI44L	3.26654e-05	0.277229	0.609284	-0.332055
cg13953972	NM_031453	FAM107B	0.00622935	0.530289	0.857657	-0.327369
cg14218851			0.00622935	0.339912	0.626725	-0.286813
cg14293575	NM_017414	USP18	0.000539576	0.309855	0.590538	-0.280683
cg27436995	NM_153350	FBXL16	0.00400884	0.6094	0.337396	0.272004
cg23564471	NM_001005388;NM_001160331;NM_015090;NM_001160332	NFASC;NFASC;NFASC;NFASC	0.00539169	0.659261	0.921084	-0.261823
cg00514723	NM_032221	CHD6	0.0013077	0.224208	0.472673	-0.248465
cg04922029	NM_001122951;NM_002036;NM_002036	DARC;DARC;DARC	0.0057972	0.39891	0.642105	-0.243195
cg19245335	NM_022115;NM_001040424	PRDM15;PRDM15	0.00318837	0.579056	0.820867	-0.241811
cg11693709	NM_020168;NM_001128628;NM_001128629	PAK6;PAK6;PAK6	0.00344351	0.268191	0.509442	-0.241251
cg25830305	NM_003282;NM_001145829	TNNI2;TNNI2	0.00344351	0.324272	0.0852975	0.238975
cg23233416			0.00203521	0.559299	0.796163	-0.236865
cg14102437	NM_001166264;NM_000627;NM_001166266;NM_001166264;NM_000627;NM_206943;NM_001166265;NM_001166266;NM_001166265	LTBP1;LTBP1;LTBP1;LTBP1;LTBP1;LTBP1;LTBP1;LTBP1;LTBP1	0.000251303	0.473046	0.709713	-0.236667
cg06981309	NM_021105	PLSCR1	0.000447907	0.161837	0.396358	-0.234521
cg06872964	NM_006820	IFI44L	0.000305694	0.261192	0.492911	-0.231718
cg27141807	NM_080862	SPSB4	0.00318837	0.872546	0.643605	0.228941
cg12733396	NM_001852	COL9A2	0.000336738	0.599516	0.377431	0.222086
cg22508930	NM_015646;NM_001010942	RAP1B;RAP1B	0.00717946	0.573183	0.356442	0.216741
cg02389040			0.00400884	0.404209	0.620121	-0.215912
cg16682903	NM_001105;NM_001111067	ACVR1;ACVR1	0.00432125	0.357797	0.572296	-0.214499
cg01361499			0.00465502	0.234646	0.449115	-0.214468
cg12903648	NM_031281	FCRL5	3.32831e-06	0.511766	0.299584	0.212182
cg24262870			0.0013077	0.195751	0.407717	-0.211966
cg16174106	NM_018194;NM_001170564;NM_001170580;NM_001170588;NM_001122834;NM_001170587	HHAT;HHAT;HHAT;HHAT;HHAT;HHAT	0.000407605	0.215392	0.426628	-0.211235
cg01974091	NM_206918	DEGS2	0.000407605	0.648929	0.439542	0.209386
cg04332442	NM_014246	CELSR1	0.000647979	0.232226	0.440954	-0.208728
cg16273546			0.000205893	0.552183	0.758472	-0.206289
cg13740929			0.000847879	0.619087	0.82427	-0.205183
cg14167415			0.00946756	0.537061	0.741655	-0.204594
cg21785750			0.00770052	0.643275	0.847624	-0.204349
cg13429555			0.00110202	0.261973	0.466014	-0.204041
cg18910313	NM_001040664;NM_002566	PPAN-P2RY11;P2RY11	0.00182573	0.396674	0.194064	0.20261
cg18076842	NM_020179	C11orf75	0.0013077	0.242353	0.444924	-0.202571
cg08570034	NM_006650	CPLX2	0.00318837	0.368306	0.5692	-0.200895
cg16301894			0.00371664	0.508386	0.706739	-0.198353
cg06318935			0.00946756	0.538239	0.735845	-0.197607
cg05857999			0.00946756	0.436603	0.633854	-0.19725
cg07455790			0.0057972	0.650981	0.847773	-0.196792
cg21211645	NM_015340	LARS2	5.77757e-05	0.415139	0.611589	-0.19645
cg01792601			0.00182573	0.32865	0.132355	0.196295
cg04597312	NM_002163	IRF8	0.000136777	0.520859	0.324774	0.196085
cg15611600	NM_018559;NM_012345	KIAA1704;NUFIP1	0.00717946	0.22437	0.0283973	0.195973
cg04936619	NM_022344	C17orf75	0.00663553	0.307339	0.502991	-0.195651
cg25769566			0.000925989	0.711584	0.907081	-0.195497
cg00050618	NM_181079;NM_181078	IL21R;IL21R	0.000491803	0.429794	0.234409	0.195384
cg02304584			0.0029502	0.386865	0.582147	-0.195283
cg22169990	NM_001042535;NM_031946	AGAP3;AGAP3	0.00182573	0.238807	0.434004	-0.195198
cg10170847			0.00182573	0.487278	0.292463	0.194816
cg12271419	NM_001160036;NM_015178;NM_001160037	RHOBTB2;RHOBTB2;RHOBTB2	0.000491803	0.368901	0.174204	0.194698
cg23985447	NM_001077654;NM_014350	TNFAIP8;TNFAIP8	8.03836e-05	0.443965	0.249268	0.194697
cg10696677	NM_001167827;NM_007162	TFEB;TFEB	0.00272801	0.502023	0.308332	0.193691
cg16704590	NR_003605;NR_003606;NR_003695;NR_003030;NR_031660;NR_003604	C20orf199;C20orf199;SNORD12B;SNORD12;MIR1259;C20orf199	0.000336738	0.472843	0.279537	0.193305
cg18264486			0.00770052	0.433777	0.626804	-0.193027
cg13738155			0.00296513	0.262279	0.454727	-0.192447
cg01099825	NM_015456	COBRA1	0.00371664	0.292666	0.484399	-0.191733
cg07368857	NM_032682;NM_001012505	FOXP1;FOXP1	0.000407605	0.619154	0.42814	0.191014
cg18182216	NM_018379;NM_001163259;NM_001163258;NM_001163260;NM_001040217	FAM63A;FAM63A;FAM63A;FAM63A;FAM63A	7.2074e-05	0.384831	0.574825	-0.189993
cg18281939	NM_005779	LHFPL2	0.000647979	0.227064	0.416566	-0.189502
cg13571460	NM_199160;NM_014368	LHX6;LHX6	0.00539169	0.726317	0.915475	-0.189158
cg11702988	NM_015205;NM_032189	ATP11A;ATP11A	0.00946756	0.371388	0.182527	0.188861
cg02997796	NM_014488	RAB30	0.000277283	0.634386	0.446469	0.187918
cg00480856	NM_003941	WASL	0.000647979	0.530264	0.717983	-0.18772
cg01178099			0.00344351	0.291701	0.479226	-0.187524
cg06315208	NM_014641	MDC1	0.000792279	0.652242	0.465981	0.186261
cg10929921	NM_003506;NM_001164615;NM_001164616	FZD6;FZD6;FZD6	5.77757e-05	0.412654	0.598413	-0.185759
cg03909983			9.97036e-05	0.397898	0.582744	-0.184846
cg22514722	NM_007283;NM_001003794	MGLL;MGLL	0.00101055	0.648029	0.463939	0.18409
cg13886799	NM_001001891;NM_001001666;NM_001001666;NM_001001891	ANO7;ANO7;ANO7;ANO7	0.00344725	0.553288	0.37013	0.183158
cg05542681	NM_153350	FBXL16	0.00656681	0.276772	0.0941461	0.182626
cg21983531	NM_001163636;NM_032999;NM_033000;NM_033001;NM_001518	GTF2I;GTF2I;GTF2I;GTF2I;GTF2I	0.00132378	0.495808	0.313678	0.18213
cg13708645	NM_032590;NM_001005366	KDM2B;KDM2B	0.00182573	0.402733	0.220865	0.181868
cg01050273			2.29128e-05	0.487367	0.305663	0.181704
cg06394109			0.00820381	0.814108	0.634581	0.179527
cg15411840	NR_028595	CCDC162	0.00272801	0.311124	0.489956	-0.178832
cg26168224			6.45615e-05	0.648993	0.827652	-0.178659
cg16075649	NR_024433	LOC283663	0.000136777	0.49711	0.320606	0.176504
cg08861456	NM_175911	OR2L13	0.00214826	0.493734	0.317352	0.176382
cg21158528	NM_004619;NM_001033910	TRAF5;TRAF5	7.2074e-05	0.525228	0.34914	0.176087
cg07460842			0.00622935	0.212206	0.0369217	0.175284
cg26960322	NM_020311	CXCR7	0.000251303	0.622714	0.447739	0.174975
cg05856321			0.00120089	0.411835	0.237106	0.174729
cg25330422	NM_213662;NM_139276;NM_003150	STAT3;STAT3;STAT3	0.0029502	0.437067	0.262904	0.174163
cg13918228	NR_026671;NR_026672;NM_001781	CD69;CD69;CD69	0.000591527	0.24738	0.42147	-0.17409
cg23983453	NM_005654	NR2F1	0.00946756	0.204187	0.378179	-0.173992
cg21477985	NM_016584	IL23A	0.000626927	0.488044	0.314109	0.173935
cg10549986	NM_080657	RSAD2	2.90545e-05	0.287247	0.46097	-0.173724
cg02957270	NM_001075099;NM_003726	SKAP1;SKAP1	5.77757e-05	0.625326	0.798602	-0.173276
cg03626672	NM_020311	CXCR7	0.00318837	0.567571	0.394865	0.172706
cg16281534	NM_006317	BASP1	0.000336738	0.606639	0.434	0.172639
cg20006618	NM_003603;NM_021069;NM_001145670;NM_001145671;NM_001145672;NM_001145673	SORBS2;SORBS2;SORBS2;SORBS2;SORBS2;SORBS2	0.000251303	0.515259	0.342809	0.172449
cg14398557	NM_178578	PSMF1	0.00622935	0.510525	0.338646	0.171878
cg25585279			0.000370631	0.401152	0.229464	0.171688
cg08779649			0.00770052	0.515521	0.344289	0.171231
cg02303805	NM_004456;NM_152998	EZH2;EZH2	0.000305694	0.365755	0.195173	0.170582
cg02956248	NM_005155;NM_030651;NM_138717	PPT2;PRRT1;PPT2	0.000591527	0.667925	0.498348	0.169577
cg06313775	NM_001145317;NM_024918;NM_001145316;NM_001145318;NM_001145315	DSN1;DSN1;DSN1;DSN1;DSN1	0.0082544	0.611659	0.442206	0.169453
cg02394698	NM_001025616	ARHGAP24	0.000227564	0.300568	0.132209	0.168359
cg24995347	NM_001005176;NM_007237	SP140;SP140	0.000407605	0.630289	0.462163	0.168126
cg05649077			0.000258613	0.453193	0.620932	-0.167739
cg01859460	NM_004152	OAZ1	0.00232791	0.792289	0.625037	0.167252
cg16653991	NM_001144914;NM_001144915;NM_022970;NM_001144913;NM_001144916;NM_000141;NM_001144917;NM_001144919;NM_001144918	FGFR2;FGFR2;FGFR2;FGFR2;FGFR2;FGFR2;FGFR2;FGFR2;FGFR2	0.00400884	0.582467	0.749475	-0.167007
cg25988214	NM_001037984;NM_138570	SLC38A10;SLC38A10	0.000847879	0.46703	0.300081	0.166949
cg08428292			6.66743e-07	0.394247	0.227792	0.166455
cg23828876	NM_005017	PCYT1A	0.0066896	0.503449	0.337113	0.166336
cg13832372	NM_199160;NM_014368	LHX6;LHX6	0.000251303	0.374078	0.207754	0.166324
cg04012282	NM_001013650	PRR23B	0.00884283	0.637728	0.803897	-0.166169
cg09125779	NM_139212;NM_001145460;NM_032495	HOPX;HOPX;HOPX	0.0066896	0.546629	0.380545	0.166084
cg22324981	NM_006162;NM_172388;NM_172389;NM_172387	NFATC1;NFATC1;NFATC1;NFATC1	7.77731e-07	0.376664	0.210708	0.165957
cg15278374	NM_198827	GPR133	0.0029502	0.754211	0.588742	0.165469
cg03776082			0.00432125	0.323176	0.488593	-0.165417
cg27019717	NM_053064	GNG2	0.000847879	0.382614	0.547252	-0.164638
cg24118856	NM_001040664;NM_002566	PPAN-P2RY11;P2RY11	0.00122675	0.623225	0.458912	0.164313
cg16960758	NM_001171631;NM_052946;NM_001171632;NM_001039724	NOSTRIN;NOSTRIN;NOSTRIN;NOSTRIN	0.000847879	0.384073	0.548321	-0.164248
cg27317694	NM_001268	RCBTB2	0.00214826	0.643574	0.47933	0.164245
cg01860774	NM_006977	ZBTB25	0.00371664	0.417976	0.254088	0.163887
cg04168675	NM_014689	DOCK10	0.00110857	0.735616	0.571832	0.163784
cg06538345	NR_026712;NR_000020;NR_000018;NR_000019;NM_012423;NR_000021	RPL13AP5;SNORD33;SNORD35A;SNORD34;RPL13A;SNORD32A	0.000591527	0.705543	0.541821	0.163722
cg18831134	NM_001159746	ABR	0.000336738	0.633816	0.470242	0.163574
cg26047334	NM_022648	TNS1	0.00214826	0.383294	0.21982	0.163474
cg16519742	NM_001146326;NM_001146327;NM_015363	ZIM2;ZIM2;ZIM2	0.00622935	0.645636	0.808952	-0.163316
cg01815690	NM_001099743;NM_001099751;NM_001099752;NM_001099754;NM_001099753;NM_001099744;NM_001099748;NM_001099746;NM_001099747;NM_017786;NM_001099745;NM_001099756;NM_001099755;NM_001099749;NM_001099750	GOLSYN;GOLSYN;GOLSYN;GOLSYN;GOLSYN;GOLSYN;GOLSYN;GOLSYN;GOLSYN;GOLSYN;GOLSYN;GOLSYN;GOLSYN;GOLSYN;GOLSYN	0.00120089	0.591148	0.428381	0.162767
cg03678039	NM_134268	CYGB	0.00154733	0.72772	0.565193	0.162528
cg19956889	NM_014688	USP6NL	0.00221305	0.588791	0.426446	0.162345
cg21648069	NM_178039;NR_027948;NR_027949;NM_178040;NR_027946	ERC1;ERC1;ERC1;ERC1;ERC1	0.0066896	0.413524	0.575811	-0.162287
cg05720871	NM_001099743;NM_001099751;NM_001099752;NM_001099754;NM_001099753;NM_001099744;NM_001099748;NM_001099746;NM_001099747;NM_017786;NM_001099745;NM_001099756;NM_001099755;NM_001099749;NM_001099750	GOLSYN;GOLSYN;GOLSYN;GOLSYN;GOLSYN;GOLSYN;GOLSYN;GOLSYN;GOLSYN;GOLSYN;GOLSYN;GOLSYN;GOLSYN;GOLSYN;GOLSYN	0.000647979	0.408823	0.246974	0.161849
cg25545500	NM_001002907	OR8K1	0.00101055	0.545497	0.383681	0.161816
cg23216724	NM_005299	GPR31	0.00120089	0.554118	0.392958	0.16116
cg25654695	NM_004152	OAZ1	0.00246675	0.708783	0.547692	0.161091
cg23035449	NM_198526	ZNF710	0.000136777	0.580587	0.741526	-0.160938
cg23895722	NM_145013;NM_000890	C11orf45;KCNJ5	0.000539576	0.416278	0.577163	-0.160885
cg19634573	NM_014661	FAM53B	0.000539576	0.443814	0.604597	-0.160783
cg14703454	NM_007072	HHLA2	0.0029502	0.42339	0.584088	-0.160698
cg15206834	NM_031438	NUDT12	0.00318837	0.258561	0.419254	-0.160693
cg05688618	NM_001025616;NM_001042669;NM_001042669	ARHGAP24;ARHGAP24;ARHGAP24	0.00110857	0.354034	0.193725	0.160309
cg27583922	NM_145057	CDC42EP5	0.00120089	0.548201	0.387993	0.160208
cg00464046	NR_024185;NR_024186;NM_024033	C7orf49;C7orf49;C7orf49	0.00371664	0.483995	0.323816	0.160179
cg00925492			3.81861e-06	0.539926	0.699424	-0.159498
cg25953417	NM_178014	TUBB	0.000370631	0.475695	0.316361	0.159334
cg27046335	NM_000949	PRLR	0.000336738	0.468275	0.627458	-0.159184
cg13844463	NM_004171	SLC1A2	0.000123209	0.381992	0.223288	0.158704
cg15947697	NR_026816	PSORS1C3	0.00232791	0.364571	0.206026	0.158545
cg24956391	NM_198291;NM_005417	SRC;SRC	2.89698e-06	0.788524	0.630002	0.158522
cg04370983	NM_006265	RAD21	0.00455336	0.35293	0.194479	0.158451
cg00540464			0.00120089	0.606439	0.448464	0.157975
cg08090385			0.00101055	0.902823	0.74492	0.157903
cg23948811			0.000336738	0.612036	0.454337	0.157699
cg14040931	NM_005476;NM_001128227	GNE;GNE	0.00377445	0.713947	0.556377	0.15757
cg26020695	NM_198849	SIAH3	0.00110202	0.690309	0.847805	-0.157496
cg11423096	NM_016290	UIMC1	0.00101353	0.449173	0.291736	0.157437
cg23304647	NM_007353	GNA12	0.00272801	0.359177	0.516372	-0.157195
cg00110545			0.000925989	0.532691	0.375562	0.157129
cg19861842	NM_001160036;NM_015178;NM_001160037	RHOBTB2;RHOBTB2;RHOBTB2	0.00717946	0.355055	0.197972	0.157083
cg14325436	NM_024527	ABHD8	0.000539576	0.73433	0.577374	0.156956
cg02450064	NM_024119	DHX58	2.03143e-05	0.294785	0.138288	0.156498
cg21787323	NM_018480;NM_001142699	TMEM126B;DLG2	0.00432125	0.388263	0.54454	-0.156278
cg08832695	NR_033203;NR_033205;NR_033204;NR_033201;NM_018952;NR_033202	LOC404266;LOC404266;LOC404266;LOC404266;HOXB6;LOC404266	0.000223716	0.376639	0.532896	-0.156257
cg22809047	NM_001099693;NM_000993;NM_001098577	RPL31;RPL31;RPL31	0.00214826	0.652491	0.808703	-0.156212
cg27395654	NM_004198	CHRNA6	0.000434933	0.399962	0.243859	0.156103
cg02787852	NM_181079;NM_181078;NM_181079	IL21R;IL21R;IL21R	0.000539576	0.47792	0.322043	0.155877
cg05365532	NM_006669	LILRB1	0.000491803	0.448075	0.292565	0.15551
cg01787084	NR_024568;NM_024735	FBXO31;FBXO31	0.000336738	0.212805	0.368144	-0.155339
cg12076931	NM_017617	NOTCH1	0.000447907	0.333177	0.488479	-0.155302
cg17934470			0.000925989	0.377873	0.533027	-0.155154
cg00428382			2.03143e-05	0.677477	0.832387	-0.154911
cg13282971	NM_024060;NM_001620	AHNAK;AHNAK	0.00770052	0.573101	0.418283	0.154818
cg22575379	NR_027766;NR_002949	NUDT16P;NUDT16P	0.000110886	0.325015	0.479704	-0.154689
cg20005518	NM_018042;NM_018042	SLFN12;SLFN12	0.00371664	0.35099	0.196436	0.154553
cg07218880	NM_080687;NM_023011	UPF3A;UPF3A	0.00717946	0.459423	0.304912	0.154511
cg01940297	NR_031612;NR_003367	MIR1207;PVT1	0.00339846	0.614689	0.460197	0.154492
cg01965673			0.000305694	0.572164	0.418217	0.153946
cg17990365	NM_021034	IFITM3	0.000227564	0.64004	0.793929	-0.153889
cg03649060	NM_032377	ELOF1	0.00318837	0.42372	0.26984	0.15388
cg22052056	NM_175849;NM_006892;NM_175848	DNMT3B;DNMT3B;DNMT3B	0.000491803	0.512809	0.666611	-0.153803
cg00022997			0.00465502	0.629134	0.782801	-0.153668
cg14255337	NM_032590;NM_001005366	KDM2B;KDM2B	0.00214826	0.409624	0.25626	0.153364
cg21794222	NM_004367;NM_031409	CCR6;CCR6	0.00371664	0.349215	0.195899	0.153317
cg02048922	NM_001702	BAI1	0.00714027	0.6509	0.497674	0.153226
cg19951006	NM_016584	IL23A	5.77757e-05	0.347713	0.1945	0.153213
cg20334079	NM_148957	TNFRSF19	0.00198112	0.467406	0.620533	-0.153127
cg11003133	NM_004833	AIM2	0.00110202	0.527696	0.374579	0.153118
cg13200575			0.00539169	0.254425	0.40753	-0.153106
cg00394261	NM_000163	GHR	8.03836e-05	0.581276	0.428228	0.153048
cg18567954	NM_004416	DTX1	3.26654e-05	0.682466	0.529756	0.152709
cg01876338	NM_006794;NM_001164165;NM_006794	GPR75;LOC100302652;GPR75	0.00120089	0.709214	0.861895	-0.15268
cg25947970			0.000925989	0.44999	0.602532	-0.152542
cg05496603	NM_001137560	TMEM151B	0.0029502	0.712199	0.864492	-0.152294
cg14778922	NM_014228	SLC6A7	0.00717946	0.578012	0.425758	0.152254
cg19666600	NM_001164372;NM_013300	GPN3;C12orf24	0.00829162	0.691985	0.539804	0.152181
cg24757755	NR_003531;NR_003530;NR_002766	MEG3;MEG3;MEG3	0.000370631	0.570684	0.418742	0.151942
cg18963065	NM_203281;NM_001721	BMX;BMX	9.97036e-05	0.512531	0.664233	-0.151703
cg10372770			0.0057972	0.706006	0.857641	-0.151635
cg13095698	NM_001012980;NM_001163541	SATL1;SATL1	0.0066896	0.719803	0.871232	-0.151428
cg10426581	NM_001128852;NM_015908;NM_001128854;NM_001128853	SRRT;SRRT;SRRT;SRRT	8.03836e-05	0.381393	0.230075	0.151318
cg16555533	NM_031849;NM_018905;NM_031411;NM_031857;NM_018910;NM_018900;NM_018909;NM_018908;NM_018901;NM_018906;NM_018907;NM_031860;NM_018911	PCDHA6;PCDHA2;PCDHA1;PCDHA9;PCDHA7;PCDHA1;PCDHA6;PCDHA5;PCDHA10;PCDHA3;PCDHA4;PCDHA10;PCDHA8	0.00252088	0.721077	0.872373	-0.151296
cg01664151	NM_015082	FSTL4	0.00232791	0.645005	0.493792	0.151213
cg14115756	NM_005294;NM_012197	GPR21;RABGAP1	0.00232791	0.289969	0.441167	-0.151198
cg15555017	NM_001143820	ETS1	0.00120089	0.515272	0.666469	-0.151196
cg15907473	NM_180989	GPR180	0.00110857	0.67664	0.827812	-0.151172
cg09277575	NM_005989	AKR1D1	8.03836e-05	0.353712	0.202739	0.150973
cg14847626	NM_006312;NM_001077261	NCOR2;NCOR2	0.000232965	0.643527	0.492603	0.150924
cg08946713	NM_139266;NM_007315	STAT1;STAT1	0.0057972	0.32661	0.4775	-0.15089
cg09122035			0.00120089	0.483588	0.63403	-0.150441
cg04341806	NM_002298	LCP1	0.000227564	0.387221	0.237055	0.150166
cg02522485	NM_001165928;NM_004393	DAG1;DAG1	0.00432125	0.227402	0.377564	-0.150162
cg02419321	NM_002205	ITGA5	0.00318837	0.201211	0.351349	-0.150139
cg14353508	NM_003116	SPAG4	0.00142298	0.535504	0.385443	0.15006

## Sheet: CpG BL DiffMedian>20% p<0.01
targetID	geneCode	geneName	p values	median_LB patients	median_LB controls	diffMedian_LB patients to controls
cg05696877	NM_006820	IFI44L	0.000186125	0.19193	0.633779	-0.441849
cg09639108			0.00859181	0.534013	0.934506	-0.400494
cg12501287	NM_005539	INPP5A	0.00663553	0.560641	0.960031	-0.39939
cg14114910	NM_198469	MORN5	0.0066896	0.560745	0.953285	-0.39254
cg05552874	NM_001548	IFIT1	8.47324e-06	0.294863	0.684103	-0.38924
cg16866567	NM_021623	PLEKHA2	0.00530429	0.457565	0.0684451	0.38912
cg16564132			0.0029502	0.219294	0.562267	-0.342973
cg19585676	NM_002116	HLA-A	0.0082544	0.700715	0.359224	0.341491
cg04282082	NM_199160;NM_014368	LHX6;LHX6	0.0013077	0.566787	0.907969	-0.341182
cg03607951	NM_006820	IFI44L	3.26654e-05	0.277229	0.609284	-0.332055
cg13953972	NM_031453	FAM107B	0.00622935	0.530289	0.857657	-0.327369
cg14218851			0.00622935	0.339912	0.626725	-0.286813
cg14293575	NM_017414	USP18	0.000539576	0.309855	0.590538	-0.280683
cg27436995	NM_153350	FBXL16	0.00400884	0.6094	0.337396	0.272004
cg23564471	NM_001005388;NM_001160331;NM_015090;NM_001160332	NFASC;NFASC;NFASC;NFASC	0.00539169	0.659261	0.921084	-0.261823
cg00514723	NM_032221	CHD6	0.0013077	0.224208	0.472673	-0.248465
cg04922029	NM_001122951;NM_002036;NM_002036	DARC;DARC;DARC	0.0057972	0.39891	0.642105	-0.243195
cg19245335	NM_022115;NM_001040424	PRDM15;PRDM15	0.00318837	0.579056	0.820867	-0.241811
cg11693709	NM_020168;NM_001128628;NM_001128629	PAK6;PAK6;PAK6	0.00344351	0.268191	0.509442	-0.241251
cg25830305	NM_003282;NM_001145829	TNNI2;TNNI2	0.00344351	0.324272	0.0852975	0.238975
cg23233416			0.00203521	0.559299	0.796163	-0.236865
cg14102437	NM_001166264;NM_000627;NM_001166266;NM_001166264;NM_000627;NM_206943;NM_001166265;NM_001166266;NM_001166265	LTBP1;LTBP1;LTBP1;LTBP1;LTBP1;LTBP1;LTBP1;LTBP1;LTBP1	0.000251303	0.473046	0.709713	-0.236667
cg06981309	NM_021105	PLSCR1	0.000447907	0.161837	0.396358	-0.234521
cg06872964	NM_006820	IFI44L	0.000305694	0.261192	0.492911	-0.231718
cg27141807	NM_080862	SPSB4	0.00318837	0.872546	0.643605	0.228941
cg12733396	NM_001852	COL9A2	0.000336738	0.599516	0.377431	0.222086
cg22508930	NM_015646;NM_001010942	RAP1B;RAP1B	0.00717946	0.573183	0.356442	0.216741
cg02389040			0.00400884	0.404209	0.620121	-0.215912
cg16682903	NM_001105;NM_001111067	ACVR1;ACVR1	0.00432125	0.357797	0.572296	-0.214499
cg01361499			0.00465502	0.234646	0.449115	-0.214468
cg12903648	NM_031281	FCRL5	3.32831e-06	0.511766	0.299584	0.212182
cg24262870			0.0013077	0.195751	0.407717	-0.211966
cg16174106	NM_018194;NM_001170564;NM_001170580;NM_001170588;NM_001122834;NM_001170587	HHAT;HHAT;HHAT;HHAT;HHAT;HHAT	0.000407605	0.215392	0.426628	-0.211235
cg01974091	NM_206918	DEGS2	0.000407605	0.648929	0.439542	0.209386
cg04332442	NM_014246	CELSR1	0.000647979	0.232226	0.440954	-0.208728
cg16273546			0.000205893	0.552183	0.758472	-0.206289
cg13740929			0.000847879	0.619087	0.82427	-0.205183
cg14167415			0.00946756	0.537061	0.741655	-0.204594
cg21785750			0.00770052	0.643275	0.847624	-0.204349
cg13429555			0.00110202	0.261973	0.466014	-0.204041
cg18910313	NM_001040664;NM_002566	PPAN-P2RY11;P2RY11	0.00182573	0.396674	0.194064	0.20261
cg18076842	NM_020179	C11orf75	0.0013077	0.242353	0.444924	-0.202571
cg08570034	NM_006650	CPLX2	0.00318837	0.368306	0.5692	-0.200895

## Sheet: CpG T cell DiffMedian˃7% p<0.01
targetID	geneCode	geneName	p values	median_LT patients	median_LT controls	diffMedian_LT patients to controls
cg27308738	NM_014631	SH3PXD2A	0.000785973	0.373284	0.866642	-0.493358
cg01462799	NM_002911	UPF1	0.00449673	0.845439	0.396808	0.448631
cg27639199	NM_001080532	TMC3	0.00288193	0.0768269	0.521215	-0.444388
cg10064060	NM_001142469;NM_033201	C16orf45;C16orf45	0.0055714	0.583803	0.161091	0.422712
cg07791065			0.00900061	0.396338	0.782922	-0.386585
cg14114910	NM_198469	MORN5	0.00841894	0.570474	0.942466	-0.371991
cg07903626			0.00211577	0.420361	0.790244	-0.369883
cg03748376	NM_175911;NM_175911	OR2L13;OR2L13	0.00180589	0.388994	0.0639157	0.325078
cg07271471	NM_001166271;NM_153023	SPATA13;SPATA13	0.00834087	0.614068	0.932074	-0.318006
cg12483005	NM_033631;NM_001142546	LUZP1;LUZP1	0.00211577	0.389297	0.0724498	0.316847
cg06085042	NR_030296	MIR570	0.00110529	0.905004	0.592757	0.312247
cg13688186	NM_016361	ACP6	0.00310852	0.909163	0.6127	0.296463
cg04028570	NM_175911	OR2L13	0.00211577	0.34644	0.0514021	0.295038
cg02304584			0.00961706	0.580517	0.872237	-0.29172
cg02389040			0.00247245	0.69886	0.942306	-0.243445
cg08944170	NM_175911;NM_175911	OR2L13;OR2L13	0.00686652	0.230439	0.0371123	0.193327
cg08260406	NM_175911	OR2L13	0.0055714	0.241362	0.0524977	0.188864
cg06888746	NM_014631	SH3PXD2A	0.00888822	0.537577	0.349937	0.18764
cg13593530			0.00867602	0.755996	0.5804	0.175596
cg02169713			0.00273717	0.62947	0.79997	-0.1705
cg24074253	NM_004239	TRIP11	0.00130531	0.646683	0.478822	0.167861
cg21549285	NM_002462;NM_001144925	MX1;MX1	0.00141707	0.565293	0.722601	-0.157308
cg00959259	NM_001146106;NM_001146104;NM_138287;NM_031458;NM_001146103;NM_001146105;NM_001146102	PARP9;PARP9;DTX3L;PARP9;PARP9;PARP9;PARP9	0.00961706	0.410289	0.560417	-0.150128
cg26450717			0.00195534	0.522712	0.666807	-0.144095
cg00785941	NM_175911;NM_175911	OR2L13;OR2L13	0.00597688	0.20201	0.0681358	0.133874
cg12537405			0.00686652	0.825901	0.69423	0.131671
cg20433858	NM_175911	OR2L13	0.00141707	0.339302	0.21176	0.127542
cg10590338			0.00961706	0.169694	0.0426923	0.127001
cg16361249			0.00735345	0.361737	0.485722	-0.123985
cg08779649			0.00787042	0.565084	0.441228	0.123856
cg06949812	NM_152219;NM_152219	GJD3;GJD3	0.00841894	0.681334	0.557571	0.123763
cg10604476	NM_003259	ICAM5	0.00961706	0.396974	0.275831	0.121143
cg13794372	NM_001166137	LOC645961	0.00418173	0.902122	0.784819	0.117303
cg18403080			0.00267019	0.425424	0.53779	-0.112366
cg08122652	NM_001146106;NM_001146104;NM_138287;NM_031458;NM_001146103;NM_001146105;NM_001146102	PARP9;PARP9;DTX3L;PARP9;PARP9;PARP9;PARP9	0.000318649	0.655834	0.767896	-0.112062
cg23244022			0.00900061	0.130811	0.242502	-0.111691
cg25417675			0.00689165	0.760771	0.87179	-0.11102
cg01550828	NM_152617	RNF168	0.00597688	0.623289	0.733978	-0.110689
cg17583263			0.00166678	0.727569	0.618384	0.109184
cg17546721	NM_001024847;NM_003242	TGFBR2;TGFBR2	0.000769768	0.428566	0.320635	0.10793
cg26168224			0.00211577	0.683053	0.790779	-0.107726
cg13150925			0.00180589	0.71946	0.612255	0.107205
cg00376816	NM_001005335;NM_001533	HNRNPL;HNRNPL	0.00449673	0.359326	0.25275	0.106575
cg06847624	NM_001029886	PFN3	0.00310852	0.594898	0.488601	0.106297
cg07951728			0.0072849	0.25336	0.358014	-0.104654
cg24847846			0.00597688	0.224848	0.122944	0.101904
cg09539908	NM_025232	REEP4	0.00388645	0.848529	0.747546	0.100983
cg02737384	NM_032023	RASSF4	0.00180589	0.335312	0.435867	-0.100556
cg06182923	NM_052896	CSMD2	0.00841894	0.599142	0.699565	-0.100423
cg06188083	NM_001549;NM_001031683	IFIT3;IFIT3	2.61732e-05	0.251133	0.350989	-0.0998553
cg19935756	NM_000812	GABRB1	0.00418173	0.542176	0.442623	0.0995523
cg27436995	NM_153350	FBXL16	0.00519038	0.884514	0.786996	0.0975181
cg00005849			0.00841894	0.492888	0.588839	-0.0959518
cg23910413	NR_026705	VTRNA1-3	0.00640813	0.587357	0.492084	0.0952734
cg18924229			0.00110529	0.893099	0.799259	0.09384
cg11829633	NM_015316	PPP1R13B	0.00180589	0.88561	0.792381	0.0932287
cg00174901	NM_002579;NM_001040134	PALM;PALM	0.00961706	0.475011	0.568037	-0.0930259
cg15065340	NM_005781	TNK2	0.00211577	0.470997	0.561525	-0.0905286
cg16533363			0.00418173	0.194666	0.284721	-0.0900554
cg20434529	NM_175911	OR2L13	0.00640813	0.142973	0.0529272	0.090046
cg14951497	NM_139266;NM_007315	STAT1;STAT1	0.0055714	0.249866	0.339804	-0.0899379
cg03088219	NM_201591;NM_005277;NM_201592	GPM6A;GPM6A;GPM6A	0.00166678	0.560981	0.650767	-0.0897858
cg25563983	NR_015352	CECR7	0.00961706	0.41675	0.504945	-0.0881951
cg21197594	NM_024757;NR_024341;NM_001145527	EHMT1;FLJ40292;EHMT1	0.000785973	0.732996	0.820453	-0.0874571
cg27540367	NM_000660	TGFB1	0.00153737	0.297422	0.210037	0.0873847
cg17212919	NM_006317	BASP1	0.0055714	0.824732	0.737494	0.0872381
cg10356904			0.00449673	0.874	0.786939	0.0870614
cg02879122	NM_014695	CCDC144A	0.00101604	0.767552	0.854504	-0.0869525
cg07833467	NM_138433;NM_138433	KLHDC7B;KLHDC7B	0.000132346	0.402307	0.48925	-0.0869429
cg03049249	NM_014695	CCDC144A	0.00418173	0.559342	0.646134	-0.086792
cg01046070	NM_001142497;NM_152649	MLKL;MLKL	0.00519038	0.660094	0.573533	0.0865612
cg11155432	NM_016279	CDH9	0.00686652	0.706888	0.620389	0.0864996
cg27183173	NM_002579;NM_001040134	PALM;PALM	0.000832015	0.742031	0.828506	-0.0864743
cg05821634	NR_024279	FLJ37453	0.00640813	0.363611	0.449943	-0.0863318
cg15554694	NM_057162;NM_019117	KLHL4;KLHL4	0.000383996	0.342487	0.428398	-0.0859109
cg03689146			0.00735345	0.60983	0.695179	-0.0853493
cg14106933	NM_015535;NM_001100424;NM_001100423;NM_001100422	SPATS2L;SPATS2L;SPATS2L;SPATS2L	0.000552606	0.60591	0.521119	0.0847912
cg02169692	NM_017414	USP18	0.00388645	0.305846	0.390312	-0.084466
cg03651054			0.00267019	0.630558	0.546218	0.08434
cg14118997			0.00735345	0.382447	0.466234	-0.0837864
cg01444808	NM_015146;NM_001098813;NM_001098812;NM_001098811	SEPT8;SEPT8;SEPT8;SEPT8	0.00597688	0.841734	0.758034	0.0836999
cg23051926	NM_170662	CBLB	0.00180589	0.641195	0.557632	0.0835625
cg20674658	NM_020216	RNPEP	5.72195e-05	0.542234	0.45905	0.0831846
cg23782413	NM_001004416;NM_173568	UMODL1;UMODL1	0.00597688	0.848314	0.765254	0.0830601
cg03110996			0.00166678	0.340986	0.422303	-0.0813175
cg01948202	NM_017554	PARP14	0.00195534	0.190037	0.271219	-0.0811819
cg17334646			0.00483256	0.304281	0.385266	-0.080985
cg18373318	NM_052870;NM_001145427;NM_001102575	SNX18;SNX18;SNX18	0.00211577	0.237372	0.317791	-0.0804191
cg13903421	NM_006522	WNT6	0.00900061	0.464812	0.38494	0.0798714
cg08697116	NM_004917	KLK4	0.00686652	0.76419	0.685239	0.0789515
cg18710053	NM_001164478;NM_001164479	FLJ44606;FLJ44606	0.00310852	0.427131	0.348798	0.0783323
cg02379437	NM_021963	NAP1L2	0.00597688	0.367661	0.445973	-0.078312
cg06787125			0.00360983	0.933623	0.855566	0.0780572
cg21098323	NM_133168;NM_004542;NM_206818;NM_130771;NM_133169	OSCAR;NDUFA3;OSCAR;OSCAR;OSCAR	0.00180589	0.544233	0.622259	-0.0780252
cg27514565			0.00288193	0.753433	0.675943	0.0774908
cg16166826	NR_002812	HCG26	0.00288193	0.807341	0.884451	-0.0771094
cg03811829	NM_005101	ISG15	0.000461339	0.807744	0.884796	-0.0770519
cg10420063			0.00640813	0.54946	0.472542	0.0769172
cg24908058	NM_033043;NM_033043	CGB5;CGB5	0.00841894	0.531232	0.454396	0.0768361
cg07885785	NM_025159	CXorf21	0.00180589	0.630321	0.707109	-0.076788
cg14753631	NM_001168320;NM_006675	TSPAN9;TSPAN9	0.00961706	0.722332	0.798999	-0.0766671
cg15261730			0.0008568	0.400291	0.324094	0.0761971
cg15358372	NM_033500;NM_000188;NM_033498;NM_033497;NM_033496	HK1;HK1;HK1;HK1;HK1	0.00360983	0.357414	0.28136	0.0760537
cg07972458			0.00195534	0.394554	0.318837	0.0757174
cg21198300	NM_030648	SETD7	0.000552606	0.814595	0.739807	0.0747872
cg11991824			0.00211577	0.46135	0.535635	-0.0742852
cg10468737	NM_203408;NM_203408	FAM47A;FAM47A	0.00120155	0.790009	0.864116	-0.0741073
cg07123730			0.00418173	0.695912	0.621992	0.0739198
cg06660976			0.00483256	0.621199	0.547721	0.0734776
cg24503712	NM_001083965;NM_001083963;NM_001083964;NM_006862	TDRKH;TDRKH;TDRKH;TDRKH	0.0055714	0.766997	0.694186	0.0728104
cg27529018	NM_058172;NM_001145794	ANTXR2;ANTXR2	0.00247245	0.754493	0.68227	0.0722229
cg13606287	NM_001135920;NM_020829	KIAA1432;KIAA1432	0.00335084	0.179238	0.10709	0.0721481
cg14044426	NM_022107	GPSM3	0.00211577	0.538829	0.466724	0.0721044
cg05333146	NM_033309	B3GNT9	0.00211577	0.869706	0.797895	0.0718113
cg15811568	NM_015347	RIMBP2	0.00388645	0.735251	0.663636	0.0716153
cg20062691	NM_005101	ISG15	0.00072049	0.66178	0.733373	-0.0715922
cg00411413	NM_001257	CDH13	0.00961706	0.844767	0.773449	0.071318
cg22064475			0.00418173	0.706214	0.635053	0.0711605
cg06717221	NM_138813	ATP8B3	0.0055714	0.662289	0.732384	-0.0700947

## Sheet: CpG TL DiffMedian˃10% p<0.01
targetID	geneCode	geneName	p values	median_LT patients	median_LT controls	diffMedian_LT patients to controls
cg27308738	NM_014631	SH3PXD2A	0.000785973	0.373284	0.866642	-0.493358
cg01462799	NM_002911	UPF1	0.00449673	0.845439	0.396808	0.448631
cg27639199	NM_001080532	TMC3	0.00288193	0.0768269	0.521215	-0.444388
cg10064060	NM_001142469;NM_033201	C16orf45;C16orf45	0.0055714	0.583803	0.161091	0.422712
cg07791065			0.00900061	0.396338	0.782922	-0.386585
cg14114910	NM_198469	MORN5	0.00841894	0.570474	0.942466	-0.371991
cg07903626			0.00211577	0.420361	0.790244	-0.369883
cg03748376	NM_175911;NM_175911	OR2L13;OR2L13	0.00180589	0.388994	0.0639157	0.325078
cg07271471	NM_001166271;NM_153023	SPATA13;SPATA13	0.00834087	0.614068	0.932074	-0.318006
cg12483005	NM_033631;NM_001142546	LUZP1;LUZP1	0.00211577	0.389297	0.0724498	0.316847
cg06085042	NR_030296	MIR570	0.00110529	0.905004	0.592757	0.312247
cg13688186	NM_016361	ACP6	0.00310852	0.909163	0.6127	0.296463
cg04028570	NM_175911	OR2L13	0.00211577	0.34644	0.0514021	0.295038
cg02304584			0.00961706	0.580517	0.872237	-0.29172
cg02389040			0.00247245	0.69886	0.942306	-0.243445
cg08944170	NM_175911;NM_175911	OR2L13;OR2L13	0.00686652	0.230439	0.0371123	0.193327
cg08260406	NM_175911	OR2L13	0.0055714	0.241362	0.0524977	0.188864
cg06888746	NM_014631	SH3PXD2A	0.00888822	0.537577	0.349937	0.18764
cg13593530			0.00867602	0.755996	0.5804	0.175596
cg02169713			0.00273717	0.62947	0.79997	-0.1705
cg24074253	NM_004239	TRIP11	0.00130531	0.646683	0.478822	0.167861
cg21549285	NM_002462;NM_001144925	MX1;MX1	0.00141707	0.565293	0.722601	-0.157308
cg00959259	NM_001146106;NM_001146104;NM_138287;NM_031458;NM_001146103;NM_001146105;NM_001146102	PARP9;PARP9;DTX3L;PARP9;PARP9;PARP9;PARP9	0.00961706	0.410289	0.560417	-0.150128
cg26450717			0.00195534	0.522712	0.666807	-0.144095
cg00785941	NM_175911;NM_175911	OR2L13;OR2L13	0.00597688	0.20201	0.0681358	0.133874
cg12537405			0.00686652	0.825901	0.69423	0.131671
cg20433858	NM_175911	OR2L13	0.00141707	0.339302	0.21176	0.127542
cg10590338			0.00961706	0.169694	0.0426923	0.127001
cg16361249			0.00735345	0.361737	0.485722	-0.123985
cg08779649			0.00787042	0.565084	0.441228	0.123856
cg06949812	NM_152219;NM_152219	GJD3;GJD3	0.00841894	0.681334	0.557571	0.123763
cg10604476	NM_003259	ICAM5	0.00961706	0.396974	0.275831	0.121143
cg13794372	NM_001166137	LOC645961	0.00418173	0.902122	0.784819	0.117303
cg18403080			0.00267019	0.425424	0.53779	-0.112366
cg08122652	NM_001146106;NM_001146104;NM_138287;NM_031458;NM_001146103;NM_001146105;NM_001146102	PARP9;PARP9;DTX3L;PARP9;PARP9;PARP9;PARP9	0.000318649	0.655834	0.767896	-0.112062
cg23244022			0.00900061	0.130811	0.242502	-0.111691
cg25417675			0.00689165	0.760771	0.87179	-0.11102
cg01550828	NM_152617	RNF168	0.00597688	0.623289	0.733978	-0.110689
cg17583263			0.00166678	0.727569	0.618384	0.109184
cg17546721	NM_001024847;NM_003242	TGFBR2;TGFBR2	0.000769768	0.428566	0.320635	0.10793
cg26168224			0.00211577	0.683053	0.790779	-0.107726
cg13150925			0.00180589	0.71946	0.612255	0.107205
cg00376816	NM_001005335;NM_001533	HNRNPL;HNRNPL	0.00449673	0.359326	0.25275	0.106575
cg06847624	NM_001029886	PFN3	0.00310852	0.594898	0.488601	0.106297
cg07951728			0.0072849	0.25336	0.358014	-0.104654
cg24847846			0.00597688	0.224848	0.122944	0.101904
cg09539908	NM_025232	REEP4	0.00388645	0.848529	0.747546	0.100983
cg02737384	NM_032023	RASSF4	0.00180589	0.335312	0.435867	-0.100556
cg06182923	NM_052896	CSMD2	0.00841894	0.599142	0.699565	-0.100423

## Sheet: CpG TL DiffMedian˃15% p<0.01
targetID	geneCode	geneName	p values	median_LT patients	median_LT controls	diffMedian_LT patients to controls
cg27308738	NM_014631	SH3PXD2A	0.000785973	0.373284	0.866642	-0.493358
cg01462799	NM_002911	UPF1	0.00449673	0.845439	0.396808	0.448631
cg27639199	NM_001080532	TMC3	0.00288193	0.0768269	0.521215	-0.444388
cg10064060	NM_001142469;NM_033201	C16orf45;C16orf45	0.0055714	0.583803	0.161091	0.422712
cg07791065			0.00900061	0.396338	0.782922	-0.386585
cg14114910	NM_198469	MORN5	0.00841894	0.570474	0.942466	-0.371991
cg07903626			0.00211577	0.420361	0.790244	-0.369883
cg03748376	NM_175911;NM_175911	OR2L13;OR2L13	0.00180589	0.388994	0.0639157	0.325078
cg07271471	NM_001166271;NM_153023	SPATA13;SPATA13	0.00834087	0.614068	0.932074	-0.318006
cg12483005	NM_033631;NM_001142546	LUZP1;LUZP1	0.00211577	0.389297	0.0724498	0.316847
cg06085042	NR_030296	MIR570	0.00110529	0.905004	0.592757	0.312247
cg13688186	NM_016361	ACP6	0.00310852	0.909163	0.6127	0.296463
cg04028570	NM_175911	OR2L13	0.00211577	0.34644	0.0514021	0.295038
cg02304584			0.00961706	0.580517	0.872237	-0.29172
cg02389040			0.00247245	0.69886	0.942306	-0.243445
cg08944170	NM_175911;NM_175911	OR2L13;OR2L13	0.00686652	0.230439	0.0371123	0.193327
cg08260406	NM_175911	OR2L13	0.0055714	0.241362	0.0524977	0.188864
cg06888746	NM_014631	SH3PXD2A	0.00888822	0.537577	0.349937	0.18764
cg13593530			0.00867602	0.755996	0.5804	0.175596
cg02169713			0.00273717	0.62947	0.79997	-0.1705
cg24074253	NM_004239	TRIP11	0.00130531	0.646683	0.478822	0.167861
cg21549285	NM_002462;NM_001144925	MX1;MX1	0.00141707	0.565293	0.722601	-0.157308
cg00959259	NM_001146106;NM_001146104;NM_138287;NM_031458;NM_001146103;NM_001146105;NM_001146102	PARP9;PARP9;DTX3L;PARP9;PARP9;PARP9;PARP9	0.00961706	0.410289	0.560417	-0.150128

## Sheet: CpG TL DiffMedian˃20% p<0.01
targetID	geneCode	geneName	p values	median_LT patients	median_LT controls	diffMedian_LT patients to controls
cg27308738	NM_014631	SH3PXD2A	0.000785973	0.373284	0.866642	-0.493358
cg01462799	NM_002911	UPF1	0.00449673	0.845439	0.396808	0.448631
cg27639199	NM_001080532	TMC3	0.00288193	0.0768269	0.521215	-0.444388
cg10064060	NM_001142469;NM_033201	C16orf45;C16orf45	0.0055714	0.583803	0.161091	0.422712
cg07791065			0.00900061	0.396338	0.782922	-0.386585
cg14114910	NM_198469	MORN5	0.00841894	0.570474	0.942466	-0.371991
cg07903626			0.00211577	0.420361	0.790244	-0.369883
cg03748376	NM_175911;NM_175911	OR2L13;OR2L13	0.00180589	0.388994	0.0639157	0.325078
cg07271471	NM_001166271;NM_153023	SPATA13;SPATA13	0.00834087	0.614068	0.932074	-0.318006
cg12483005	NM_033631;NM_001142546	LUZP1;LUZP1	0.00211577	0.389297	0.0724498	0.316847
cg06085042	NR_030296	MIR570	0.00110529	0.905004	0.592757	0.312247
cg13688186	NM_016361	ACP6	0.00310852	0.909163	0.6127	0.296463
cg04028570	NM_175911	OR2L13	0.00211577	0.34644	0.0514021	0.295038
cg02304584			0.00961706	0.580517	0.872237	-0.29172
cg02389040			0.00247245	0.69886	0.942306	-0.243445
