# Supplementary material for: Overlap between differentially methylated DNA regions in blood B lymphocytes and genetic at-risk loci in primary Sjögren's syndrome
Source: HighWire-hosted journal article supplement (doi:10.1136/annrheumdis-2014-206998), 2015-07-17

**Supplementary figure S1.** Numbers of probes with a median methylation difference of at least 7%, 10%, 15% or 20% and  $p < 0.01$  in purified T or B lymphocyte from pSS patients compared to controls. Hypermethylated probes are denoted with '+'; hypomethylated probes with '-'.

## T lymphocytes

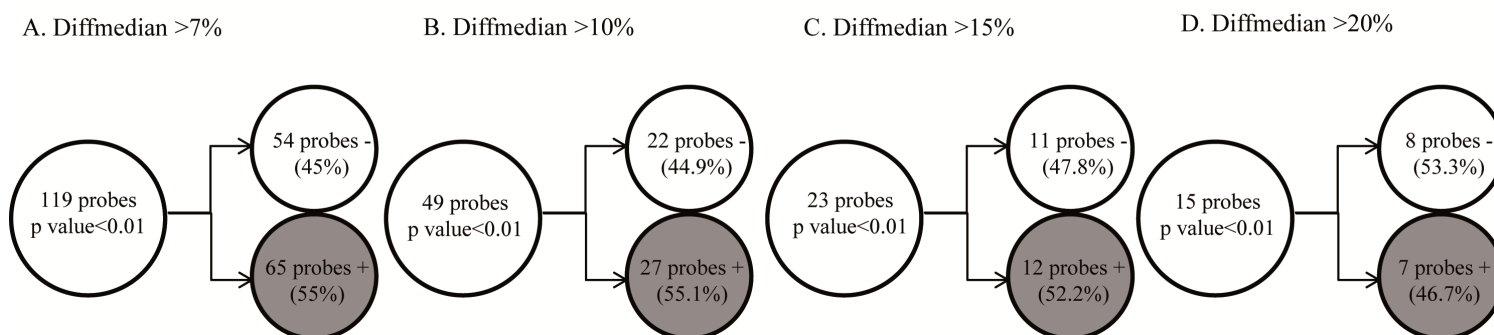

## B lymphocytes

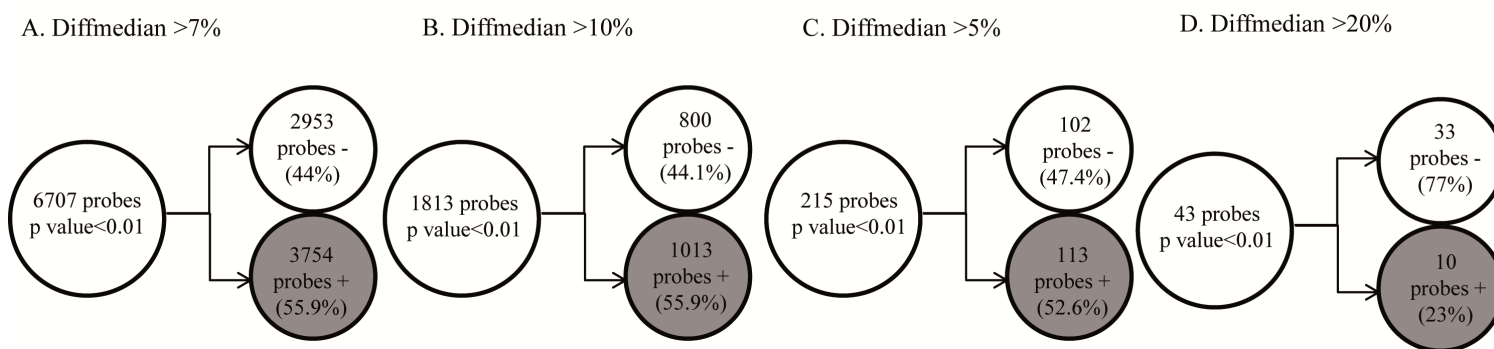

**Supplementary figure S2.** The distribution of differentially methylated probes found in B lymphocytes in relation to the UCSC annotated CpG islands (A) and the distribution of differentially methylated probes found in B lymphocytes (B) in function of their position in the gene compared to the all probes present on the 450K array.

A.

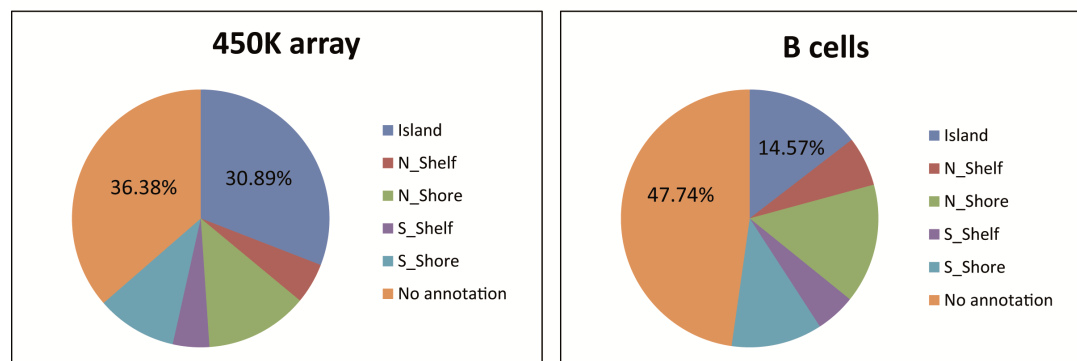

B.

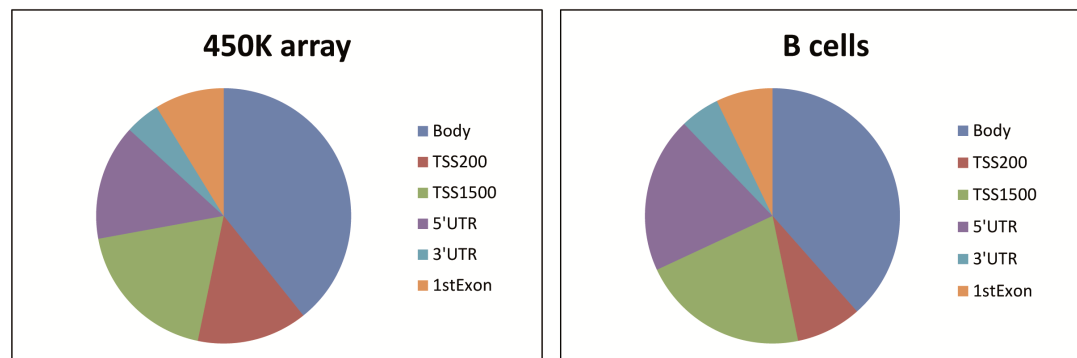

**Supplementary figure S3.** Association of DNA methylation differences with ESSDAI score in B lymphocytes from pSS patients. Genes with at least one CpG site showing at least a 7% median methylation difference and a  $p < 0.01$  in B lymphocytes from pSS patients with high ESSDAI score (A) and low ESSDAI score (B) compared to the control cohort, respectively;

**A. Patients with high ESSDAI score**

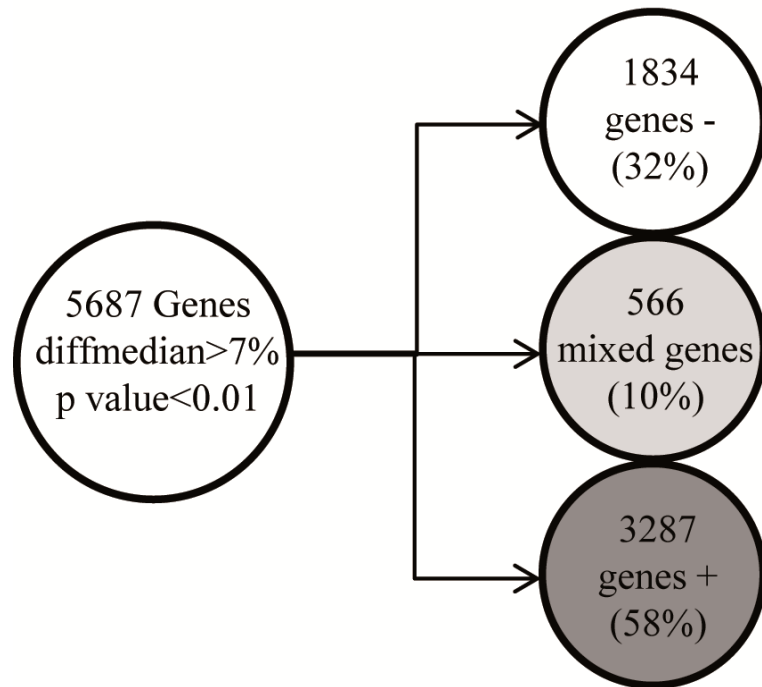

**B. Patients with low ESSDAI score**

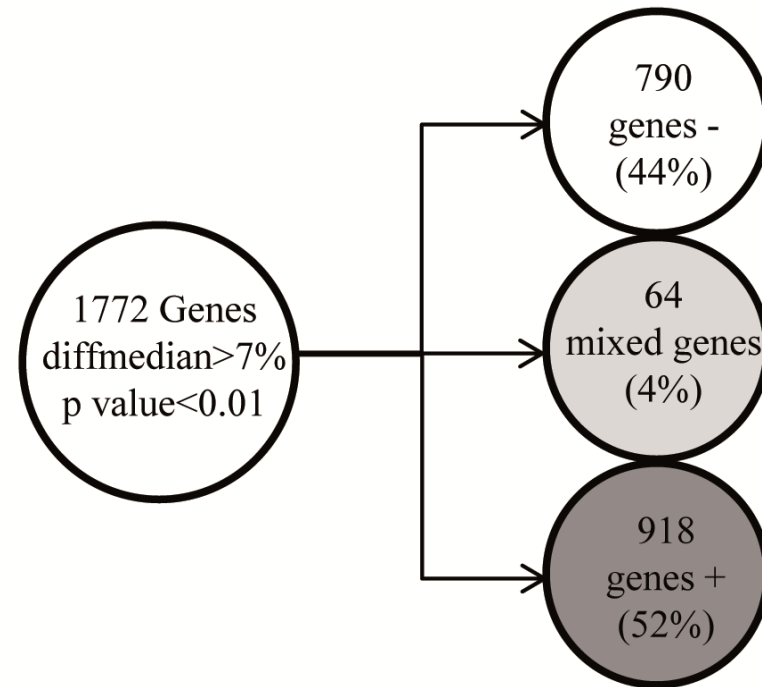

**Supplementary figure S4.** Association of DNA methylation differences with autoantibody producing activity in B lymphocytes from pSS patients. Genes with at least one CpG site showing at least a 7% median methylation difference and a  $p < 0.01$  found in B lymphocytes from pSS patients with anti-SSA+ and anti-SSB+ (A), anti-SSA+ and anti-SSB- (B) and patients with anti-SSA- (C) compared to the control cohort, respectively.

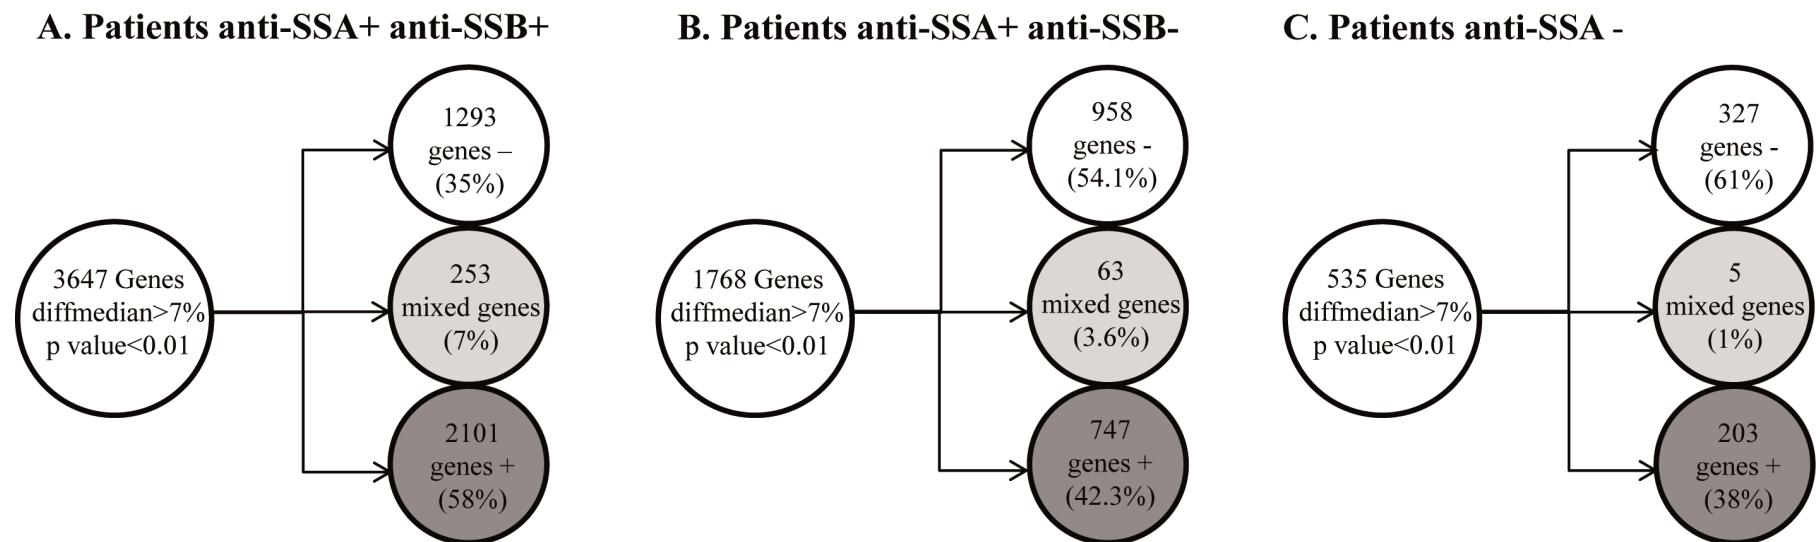

Supplement: annrheumdis-2014-206998supp_figures.pdf [file annrheumdis-2014-206998supp_figures.pdf]
