# Supplementary material for: Overlap between differentially methylated DNA regions in blood B lymphocytes and genetic at-risk loci in primary Sjögren's syndrome
Source: HighWire-hosted journal article supplement (doi:10.1136/annrheumdis-2014-206998), 2015-07-17
Supplement: annrheumdis-2014-206998supp_tables.pdf [file annrheumdis-2014-206998supp_tables.pdf]

**Supplementary table S1:** Characteristics of the analyzed cohort with primary Sjögren's syndrome (pSS) and healthy controls

|                                     | <b>pSS patients<br/>(n=26)</b> | <b>Healthy controls<br/>(n=22)</b> |
|-------------------------------------|--------------------------------|------------------------------------|
| Age, mean +/- SD (range) years      | 58 +/- 14                      | 58 +/- 19.13                       |
| Female sex (%)                      | 100                            | 100                                |
| No antibody (%)                     | 7 (27)                         | 100                                |
| anti-SSA+ anti SSB- (%)             | 8 (31)                         |                                    |
| anti-SSA+ anti-SSB+ (%)             | 11 (42)                        | NA                                 |
| ESSDAI, mean +/- SD (range)         | 3.5 +/- 4 (0 - 15)             | NA                                 |
| <u>Treatments:</u>                  |                                |                                    |
| Methotrexate (15mg/week) (%)        | 1 (3)                          | NA                                 |
| Hydroxychloroquine (400mg/d)<br>(%) | 7 (27)                         | NA                                 |

**Supplementary table S2.** List of significantly differentially methylated IFN regulated genes (IRGs) found in B lymphocytes from seropositive and seronegative pSS patients (red denotes hypomethylated genes; green hypermethylated genes; blue are genes with both hyper- and hypomethylated probes). Genes with at least 2 CpG sites significantly differentially methylated (at least 7% median difference of methylation,  $p < 0.01$ ) were included in the analysis.

| Differentially methylated IRGs found in anti-SSA+ anti-SSB + patients                                                                                                                                                       | Differentially methylated IRGs found in anti-SSA+ anti-SSB- patients                                                                                                                                                                      | Differentially methylated IRGs found in anti-SSA - patients |
|-----------------------------------------------------------------------------------------------------------------------------------------------------------------------------------------------------------------------------|-------------------------------------------------------------------------------------------------------------------------------------------------------------------------------------------------------------------------------------------|-------------------------------------------------------------|
| 76 genes                                                                                                                                                                                                                    | 24 genes                                                                                                                                                                                                                                  | 2 genes                                                     |
| <i>AHNAK</i><br><i>AIM2</i><br><i>AMPD3</i><br><i>ARAP1</i><br><i>ARHGEF2</i><br><i>ARID5A</i><br><i>ATXN1</i><br><i>CBFA2T3</i><br><i>CCL8</i><br><i>CD80</i><br><i>CETP</i><br><i>CHST15</i><br><i>CPM</i><br><i>DLG4</i> | <i>AMPD3</i><br><i>ARHGEF15</i><br><i>ATP1B2</i><br><i>CBFA2T3</i><br><i>CDH18</i><br><i>FOXO3</i><br><i>HOXB2</i><br><i>IFI44L</i><br><i>IFITM1</i><br><i>IFITM3</i><br><i>ISG15</i><br><i>JARID2</i><br><i>KIAA0754</i><br><i>MACF1</i> | <i>AR</i><br><i>DHX58</i>                                   |

*DTX3L*  
*DUSP2*  
*EMP1*  
*FAM49A*  
*FAM53B*  
*FGL2*  
*FOXO3*  
*GATM*  
*GNA12*  
*HMHA1*  
*HOXB2*  
*IFI44L*  
*IFITM1*  
*IFITM3*  
*IL10RA*  
*IRAK3*  
*IRF7*  
*ISG15*  
*ITPR2*  
*JARID2*  
*LAG3*  
*LGALS3BP*  
*LPCAT1*  
*MX1*  
*N4BP3*  
*NF1*  
*PARP12*  
*PARP9*  
*PGM1*  
*PHACTR4*  
*PIK3CD*  
*PLSCR1*  
*PPFIBP2*  
*PPM1H*  
*PRDM2*  
*PRKCA*  
*PRKCE*  
*PTPRCAP*  
*RAB8B*  
*RASSF2*  
*RERE*  
*RPL13A*  
*RPL3*  
*RSAD2*  
*RUNX3*  
*SBNO2*

*MAP3K5*  
*N4BP3*  
*PARP12*  
*PHLDA2*  
*RABGAP1L*  
*RPL3*  
*RSAD2*  
*SBNO2*  
*SNRPN*  
*ZAP70*

|                |  |  |
|----------------|--|--|
| <i>SECTM1</i>  |  |  |
| <i>SH2B2</i>   |  |  |
| <i>SLAMF7</i>  |  |  |
| <i>SNRPN</i>   |  |  |
| <i>SOCS1</i>   |  |  |
| <i>SOCS2</i>   |  |  |
| <i>SORL1</i>   |  |  |
| <i>SP140</i>   |  |  |
| <i>SPATS2L</i> |  |  |
| <i>STK17A</i>  |  |  |
| <i>TG</i>      |  |  |
| <i>TNF</i>     |  |  |
| <i>TREM1</i>   |  |  |
| <i>TRIP6</i>   |  |  |
| <i>USP6NL</i>  |  |  |
| <i>ZMIZ1</i>   |  |  |
